# Supplementary material for: An Acinetobacter baumannii acyltransferase represses pilin production to maintain energy homeostasis and overcome nutritional immunity
Source: Research Square preprint supplement (doi:10.21203/rs.3.rs-10119738/v1), 2026-06-30
Supplement: Supplementary file 1 [file 926bf04d9c404822393e5ddb.xlsx]

## Sheet: S5 untargeted metabolomics
Compound	Confidence	Prioritized Compound IDs	Prioritized Descriptions	Prioritized ID Count	Prioritized Origins	All Potential IDs	All Descriptions	All Fragmentation Scores	Potential ID Count	Adducts	Formula	Score	Mass Error (ppm)	Isotope Similarity	Neutral mass (Da)	m/z	Charge	Retention time (min)	Chromatographic peak width (min)	QC_07	QC_08	QC_09	QC_10	QC_11	QC_12	WT UT 1	WT UT 2	WT UT 3	WT UT 4	WT UT 5	aimS UT 1	aimS UT 2	aimS UT 3	aimS UT 4	aimS UT 5	WT dipyridyl 1	WT dipyridyl 2	WT dipyridyl 3	WT dipyridyl 4	WT dipyridyl 5	aimS dipyridyl 1	aimS dipyridyl 2	aimS dipyridyl 3	aimS dipyridyl 4	aimS dipyridyl 5		Fold Change WT UT vs WT dipyriyl	Anova (p). WT UT vs WT dipyriyl	q Value WT UT vs WT dipyriyl
4.66_144.0772m/z	L1	HMDB0003464	4-GUANIDINOBUTANOATE	1	Endogenous|Food	HMDB0003464|HMDB0003464	4-Guanidinobutanoic acid|4-GUANIDINOBUTANOATE	14.9|35.8	2	M-H	C5H11N3O2	47.3	-4.24865	94.7538		144.077	1	4.661	0.131367	1194.38	1230.69	1241.24	1225.16	1233.14	1145.46	1083.4	1031.06	1051.39	1065.57	1124.85	1569.46	1623.57	1057.65	1726.46	1756.2	1456.67	733.584	1440.99	1333.73	1395.53	1703.83	839.834	948.817	991.657	1650.8		1.18749	0.312197	0.134296
7.93_167.9967m/z	L1	HMDB0002757	CYSTEATE	1	Endogenous	HMDB0002757|HMDB0002757	Cysteic acid|CYSTEATE	73.2|0	2	M-H	C3H7NO5S	39.3	-2.86338	90.8698		167.997	1	7.9272	0.293383	50612.9	50749.5	50847	50984.8	50953.7	51786.7	110264	124028	122561	113780	142412	96079.3	78510.1	21408.9	115064	101013	21827.2	8044.56	15936.5	6263.17	17003.1	9119.61	2923.67	5231.43	7770.79	26662.2		-8.87513	1.32e-05	2.58e-05
7.77_330.0613m/z	L1	HMDB0000905	DEOXYADENOSINE MONOPHOSPHATE	1	Endogenous	HMDB0014387|HMDB0000905|HMDB0000905	Cladribine|Deoxyadenosine monophosphate|DEOXYADENOSINE MONOPHOSPHATE	0|38.2|80.6	3	M-H	C10H14N5O6P	55.6	1.33528	87.0301		330.061	1	7.76518	0.477383	78307.7	80522.8	80211.8	80836.8	79822.6	74849.7	128644	120822	114450	123125	133575	104820	104691	94069.2	112527	99953.7	72725.4	66087.6	65671.1	56495.8	62397.8	50845.1	50163.2	51171.1	50748.6	49467.3		-1.91917	9.5e-07	3.05e-06
4.02_272.0892m/z	L1	HMDB0000014	DEOXYCYTIDINE	1	Endogenous|Food	HMDB0000014|HMDB0000014	Deoxycytidine|DEOXYCYTIDINE	31.6|70.8	2	M+FA-H	C9H13N3O4	54.9	1.76498	91.1331		272.089	1	4.02157	0.241367	5039.88	5265.66	5233.16	5225.3	5253.5	4810.61	4494.01	3847.42	3759.02	4100.8	3728.1	5999.92	6007.02	7581.73	6390.39	6410.18	4462.59	12456.9	5121.15	5981.25	4119.27	2558.08	5433.68	5387.78	4704.44	3170.54		1.61276	0.0880502	0.0471426
7.77_174.0880m/z	L1	HMDB0000904	L-CITRULLINE	1	Endogenous|Food	HMDB0000904|HMDB0003148|HMDB0000904	L-CITRULLINE|Argininic acid|Citrulline	0|0|39.7	3	M-H	C6H13N3O3	39.8	-2.57657	92.3849		174.088	1	7.76957	0.27595	10038.6	10177	10326.4	10444.3	10474.2	10476	7214.83	7392.71	7577.09	7710.15	7870.95	10665.4	10942.1	22187.5	12935.4	17513.8	8132.4	5115.64	8842.71	7532.75	7347.16	8244.94	11273.1	13112.6	15502.2	9117.15		-1.02151	0.705366	0.251951
1.98_342.0881m/z	L1	HMDB0001173	METHYLTHIOADENOSINE	1	Endogenous|Food	HMDB0001173|HMDB0001173	METHYLTHIOADENOSINE|5'-Methylthioadenosine	56.3|22.2	2	M+FA-H	C11H15N5O3S	56.4	1.01382	91.1752		342.088	1	1.97537	0.389717	22082.1	22695.7	24135	27273.8	29292.6	29296.1	17083.2	10950.7	17142.2	19102	8591.6	4090.91	4248.42	16548.8	3465.18	5287.42	50208.8	36655.5	50419.7	84331.8	54606	30447.9	52220	56139.2	54058.1	15672		3.79063	0.000176158	0.000237951
7.93_289.1278n	L1	HMDB0005765	OPHTHALMIC ACID	1	Endogenous	HMDB0005765|HMDB0005765	OPHTHALMIC ACID|Ophthalmic acid	0|78.6	2	M+Na-2H, M-H	C11H19N3O6	40.7	1.35325	92.8359	289.128	288.12	1	7.9272	0.30215	128628	128374	131005	133096	132010	129302	93839.2	96927.9	103455	103645	121464	160277	163846	128530	170323	155846	155780	132874	179775	149837	180918	190410	107216	107563	120356	170870		1.53887	0.00038505	0.000465535
2.19_219.1105n	L1	HMDB0000210	PANTOTHENATE	1	Food	HMDB0000210|HMDB0000210	PANTOTHENATE|Pantothenic acid	70.9|16.2	2	M-H, 2M-H	C9H17NO5	73.4	-0.761391	97.9062	219.111	218.103	1	2.18993	0.337183	90059.3	88106.1	86932.7	84960.3	86615.3	86950.7	95890.7	122125	129445	102791	112109	42950.4	41157.7	38863.1	39334.6	38617.8	137089	59313	108293	103874	101173	174662	66519.8	76109.7	139023	167238		-1.10323	0.416003	0.168193
7.63_302.1013m/z	L1	HMDB0000086	SN-GLYCERO-3-PHOSPHOCHOLINE	1	Endogenous|Food	HMDB0000086|HMDB0000086	SN-GLYCERO-3-PHOSPHOCHOLINE|Glycerophosphocholine	95.9|62.2	2	M+FA-H	C8H20NO6P	59.9	1.13413	95.2505		302.101	1	7.63373	0.197133	9426.15	9895.6	10275.7	10705.5	11000.5	10807.7	3443.88	3023.57	3705.88	4154.87	1816.69	12165.5	15088.9	14658.5	10387.3	17527.2	10350.9	8684.21	7155.56	6864.9	7506.14	16725.3	13542.9	17721	14155.4	16980.3		2.51236	0.000392262	0.000473105
8.53_306.0500m/z	L2	HMDB0001202	2'-DEOXYCYTIDINE 5'-MONOPHOSPHATE	1	Endogenous|Food	HMDB0125118|HMDB0062545|HMDB0001202|HMDB0001202	3,5,7-trihydroxy-2-(3-methoxyphenyl)-1Î»â´-chromen-1-ylium|2'-deoxycytidine 3'-monophosphate|dCMP|2'-DEOXYCYTIDINE 5'-MONOPHOSPHATE	0|53.1|51.7|90.7	4	M-H	C9H14N3O7P	59.4	1.1629	95.0371		306.05	1	8.5315	0.587033	31021.7	31804	31428.5	32663.6	32680.1	31743.9	45636.9	40741.9	40226.4	41465.1	46038.8	38084.7	38116.8	37895.2	41778.7	38480.3	42775	20556.2	30769.2	34679.7	38776	24370.8	18717.1	21069.2	20483.8	27904.8		-1.27783	0.0693628	0.0384732
1.40_163.0396m/z	L2	HMDB0002035	4-COUMARATE	1	Endogenous|Food	HMDB0000118|HMDB0240266|HMDB0141768|HMDB0141767|HMDB0140892|HMDB0140294|HMDB0134043|HMDB0134042|HMDB0134031|HMDB0134030|HMDB0134029|HMDB0134028|HMDB0133788|HMDB0133494|HMDB0131428|HMDB0129375|HMDB0129348|HMDB0128076|HMDB0127495|HMDB0126545|HMDB0126386|HMDB0125595|HMDB0125591|HMDB0125533|HMDB0125104|HMDB0124923|HMDB0062774|HMDB0062655|HMDB0062605|HMDB0062595|HMDB0059763|HMDB0041592|HMDB0041270|HMD…	Homovanillic Acid|Methyl vanillate|3-(4-hydroxyphenyl)oxirane-2-carbaldehyde|(2E)-3-(3,4-dihydroxyphenyl)prop-2-enal|2-hydroxy-3-(3-hydroxyphenyl)propanoic acid|2-hydroxy-2-(4-methoxyphenyl)acetic acid|3-(2,5-dihydroxyphenyl)propanoic acid|3-(2,3-dihydroxyphenyl)propanoic acid|3-(2-hydroxyphenyl)oxirane-2-carbaldehyde|3-(2,5-dihydroxyphenyl)prop-2-enal|3-(2,3-dihydroxyphenyl)prop-2-enal|3-(2-hydr…	0|0|0|0|35.4|35.3|35.4|35.4|0|0|0|37.1|35.4|35.3|35.3|0|35.4|37.1|33.4|37.1|35.4|0|0|35.4|37.1|35.4|37.1|37.1|0|35.4|33.4|37.1|0|36.6|36.6|3.67|35.4|33.1|35.9|37.1|0|33.4|35.4|37.1|0|35.4|37.1|37.1|37.1|35.4|35.4|35.3|37.1|35.3|91.2	55	M-H	C9H8O3	71.8	-3.10111	94.7892		163.04	1	1.40172	0.179533	1745.15	1783.66	1721.27	1625.85	1741.04	1869.23	624.338	701.348	820.005	703.464	804.831	1776.96	1771.7	1740.34	2115.17	2508.94	3122.68	2042.08	2778.85	3076.13	3578.65	2489.78	1689.4	1494.78	1655.92	2091.08		3.99519	1.26e-06	3.81e-06
5.58_219.0774m/z	L2	HMDB0000472	5-HYDROXY-L-TRYPTOPHAN	1	Endogenous|Food	HMDB0061174|HMDB0040988|HMDB0029739|HMDB0029451|HMDB0029105|HMDB0028853|HMDB0015084|HMDB0006240|HMDB0000472|HMDB0000472	p-Hydroxyl-ethotoin|Falimint|1H-Indole-3-acetamide|gamma-Glutaminyl-4-hydroxybenzene|Tyrosyl-Glycine|Glycyltyrosine|Felbamate|Demethylated antipyrine|5-Hydroxy-L-tryptophan|5-HYDROXY-L-TRYPTOPHAN	18|0|31.7|42.7|41.5|41|0|35.5|48|14	10	M-H	C11H12N2O3	42.1	-0.40826	87.4582		219.077	1	5.57678	0.227983	9879.62	10636.7	10647.8	11073.1	11270.6	10398.6	5868.92	3332.97	3981.99	5793.09	3186.4	17133.4	17572.6	14327.6	19750.2	21520.9	5420.64	8877.54	4717.53	4422.22	5066.19	9042.45	11423.5	15520.4	16261.5	16547.1		1.28609	0.199678	0.0935894
2.93_134.0466m/z	L2	HMDB0000034	ADENINE	1	Endogenous|Food	HMDB0004816|HMDB0000034|HMDB0000034	FAPy-adenine|Adenine|ADENINE	64.1|63.9|79.6	3	M-H	C5H5N5	59	-4.69029	94.3028		134.047	1	2.92612	0.35065	48370.2	48996	49003.2	50089.9	51291.4	52210.1	43466.1	41943.7	46101.1	42931.7	37867.8	22592.8	23946.5	37260.6	22891.1	24966.6	55497.1	175736	81621.9	92282.6	58817.3	44905.5	22327	30515.8	31609.4	37031.2		2.18527	0.0107826	0.00791152
5.81_328.0457m/z	L2	HMDB0011616	ADENOSINE 2',3'-CYCLIC MONOPHOSPHATE	1	Endogenous	HMDB0059594|HMDB0031800|HMDB0011617|HMDB0011616|HMDB0003540|HMDB0001044|HMDB0000058|HMDB0000045|HMDB0011616	2-hydroxy-dAMP|Mecarbam|Adenosine 2'-phosphate|Adenosine 2',3'-cyclic phosphate|3'-AMP|2'-Deoxyguanosine 5'-monophosphate|Cyclic AMP|Adenosine monophosphate|ADENOSINE 2',3'-CYCLIC MONOPHOSPHATE	10.2|0|28.9|28.9|28.9|35.6|28.9|39.1|71.3	9	M-H	C10H12N5O6P	53.4	1.29385	86.96		328.046	1	5.81352	0.188383	15231.2	14857.7	14949.9	14576.7	13934.6	13522.1	7262.2	8228.55	8590.09	7984.56	7273.33	14021.4	15271.9	16838.8	13384.4	15280.3	14415.1	11698.8	13362.9	14768	12951.5	21066.3	19244.8	23055.7	21869.2	19824.8		1.70815	8.38e-06	1.77e-05
3.22_267.0972n	L2	HMDB0000050	ADENOSINE	1	Endogenous|Food	HMDB0014638|HMDB0014340|HMDB0000085|HMDB0000050|HMDB0000050	Zidovudine|Vidarabine|Deoxyguanosine|Adenosine|ADENOSINE	12.4|29.9|25.8|29.9|84.5	5	M-H, M+FA-H	C10H13N5O4	58.2	1.72454	87.831	267.097	312.095	1	3.21952	0.380967	114291	114838	112450	115073	116597	116453	29369.7	27215.5	28498.3	26619.1	22867.2	28333.3	27935.4	80440.9	26471.4	36405.2	80312.7	614404	81420.2	152013	73959.6	43610.7	329308	211776	183838	39876.2		7.44677	0.00383005	0.00325873
1.40_187.0972m/z	L2	HMDB0000784	AZELAIC ACID	1	Endogenous|Food	HMDB0059908|HMDB0059879|HMDB0059814|HMDB0059783|HMDB0059760|HMDB0040215|HMDB0040212|HMDB0039872|HMDB0039793|HMDB0038310|HMDB0038036|HMDB0037630|HMDB0037624|HMDB0037622|HMDB0036236|HMDB0036233|HMDB0036212|HMDB0035422|HMDB0032533|HMDB0032387|HMDB0032278|HMDB0032268|HMDB0032267|HMDB0032266|HMDB0032258|HMDB0032207|HMDB0032200|HMDB0032164|HMDB0031403|HMDB0031352|HMDB0031343|HMDB0031293|HMDB0029761|HMD…	Ethyl-3-hexanoate|Diethyl glutarate|Diethyl methylsuccinate|3-Methylsuberic acid|2,4-Dimethylpimelic acid|cis-3-Hexenyl acetate|2-Hexenyl acetate|Methyl 2-heptenoate|(E)-4-Octenoic acid|xi-Tetrahydro-6-propyl-2H-pyran-2-one|2-Propenyl 3-methylbutanoate|xi-Tetrahydro-3-propyl-2H-pyran-2-one|Isopropyl tiglate|Ethyl 2-methyl-3-pentenoate|2-Methylallyl butyrate|Butyl ethyl malonate|2-Methylpropyl (2E…	25|0|0|37.6|37.6|23|23|23|36|25.1|23.2|25.2|23|25|25|1.81|23|23.4|23|0.385|25|25|25.1|25|0.384|36|0.233|23.2|37.6|23|23|23|25.1|7.86|37.5|37.5|33.3|37.9|35.5|35.9|37.6|35.9|81.3	43	M-H	C9H16O4	61.7	-1.98612	96.8521		187.097	1	1.40172	0.345933	13335.5	13711.6	13856	13763.6	14035.7	14529.1	41932.4	14757.3	12608.7	11012.2	14568	10976.9	8483.22	13578.5	9950.09	11367.4	10606.1	12246.1	12026	13134.6	10246.1	8395.27	12436.8	10067.7	10456.7	12735		-1.62857	0.179477	0.0853754
5.37_162.0766m/z	L2	HMDB0000043	BETAINE	1	Endogenous|Food	HMDB0013716|HMDB0035359|HMDB0032862|HMDB0015550|HMDB0013716|HMDB0011727|HMDB0003355|HMDB0002141|HMDB0001382|HMDB0000883|HMDB0000043|HMDB0000043|HMDB0003355	NORVALINE|1-Deoxynojirimycin|2-Amino-4-ethoxy-3-hydroxybutanoic acid|Amyl Nitrite|Norvaline|Bicine|5-Aminopentanoic acid|N-Methyl-a-aminoisobutyric acid|Vaporole|L-Valine|Betaine|BETAINE|5-AMINOPENTANOATE	0|5.45|0|5.6|6.3|5.06|5.5|6.3|5.6|6.3|6.44|30.9|0	13	M+FA-H	C5H11NO2	45.6	-4.73551	94.1216		162.077	1	5.36618	0.34655	107219	109628	107697	112279	109901	105700	142156	149561	150562	144458	136522	98514	100151	104016	104859	99848.2	143461	122451	140535	145355	141373	92220.3	75092.5	75302.4	80066.3	90034.8		-1.0434	0.257521	0.115579
7.03_304.0344m/z	L2	HMDB0011691	CYTIDINE 2',3'-CYCLIC PHOSPHATE	1	Endogenous	HMDB0011692|HMDB0011691|HMDB0001481|HMDB0000592|HMDB0000095|HMDB0011691	Cytidine 2'-phosphate|Cytidine 2',3'-cyclic phosphate|N-Sulfo-D-glucosamine|Glucosamine 6-sulfate|Cytidine monophosphate|CYTIDINE 2',3'-CYCLIC PHOSPHATE	20.4|20.3|0.178|2.71|20.2|65.3	6	M-H	C9H12N3O7P	53.8	1.25506	95.7599		304.034	1	7.02892	0.210367	16920.7	17616.4	17747.8	17907.8	18063.5	16869	10049	10537.4	11130.4	11265.2	9861.49	18184.6	21331.9	22277.3	19125.1	22508.5	15796.4	12740	13496.5	15478	14243.3	23072.8	21294.5	24704.9	23289.6	22627.3		1.35786	0.000239359	0.000310438
8.95_322.0449m/z	L2	HMDB0000095	CYTIDINE 5'-MONOPHOSPHATE	1	Endogenous|Food	HMDB0011692|HMDB0005923|HMDB0000095|HMDB0000095|HMDB0240312	Cytidine 2'-phosphate|N4-Acetylcytidine|Cytidine monophosphate|CYTIDINE 5'-MONOPHOSPHATE|CYTIDINE 3'-MONOPHOSPHATE	67.1|46|72|0|53.3	5	M-H	C9H14N3O8P	39.1	1.16389	88.2199		322.045	1	8.95215	0.728083	421449	437130	436427	443672	439286	420528	473761	481020	462089	445280	522059	355215	358712	333123	366227	333853	650108	462955	630957	634331	686612	533343	381763	358051	395849	508450		1.28553	0.0113092	0.00823505
4.82_243.0857n	L2	HMDB0000089	CYTIDINE	1	Endogenous|Food	HMDB0060478|HMDB0015122|HMDB0000089|HMDB0000089	gamma-Glutamyl-beta-cyanoalanine|Cytarabine|Cytidine|CYTIDINE	2.95|16.2|16.2|52.8	4	M-H, M+FA-H	C9H13N3O5	50.9	0.638331	88.8079	243.086	242.078	1	4.82303	0.3023	99688.8	102154	101472	97430.9	99007.7	95884	63392.4	60988.3	58674.5	61352.9	58650.2	69989.4	68535.6	73985.1	68080.3	63430.6	123461	332345	132805	135115	120499	85981.6	141909	126542	127176	72082.7		2.78568	0.00125303	0.00125714
8.47_229.0118m/z	L2	HMDB0001548	D-RIBOSE 5-PHOSPHATE	1	Endogenous|Food	HMDB0130546|HMDB0129376|HMDB0012195|HMDB0011734|HMDB0006534|HMDB0003072|HMDB0001548|HMDB0001489|HMDB0000868|HMDB0000618|HMDB0001548	6,8-dihydroxy-7-methoxy-2H-chromen-2-one|3-(2H-1,3-benzodioxol-5-yl)-3-oxopropanoic acid|Beta-L-arabinose 1-phosphate|D-Arabinose 5-phosphate|D-Xylulose 1-phosphate|Quinic acid|D-Ribose 5-phosphate|Ribose 1-phosphate|Xylulose 5-phosphate|D-Ribulose 5-phosphate|D-RIBOSE 5-PHOSPHATE	9.14|9.65|29.4|29|27.8|27.1|29.4|29.4|29|29|0	11	M-H	C5H11O8P	40.7	-0.129824	93.907		229.012	1	8.4702	0.4379	7563.37	7815.38	7869.26	8018.91	8001.29	7883.91	12048	12570.4	12164.2	12067.1	12963.9	8578.96	7357.55	5831.87	9143.12	8637.39	5084.61	7235.4	6501.24	6068.55	4951.97	4042.55	6113.93	5826.05	6561.1	6009.53		-2.07138	8.4e-06	1.77e-05
7.98_172.0132n	L2	HMDB0000126	GLYCEROL 3-PHOSPHATE	1	Endogenous|Food	HMDB0002520|HMDB0000126|HMDB0000126|HMDB0002520	Beta-Glycerophosphoric acid|Glycerol 3-phosphate|GLYCEROL 3-PHOSPHATE|BETA-GLYCEROPHOSPHATE	20.7|20.9|0|53.7	4	M-H, 2M-H	C3H9O6P	41.1	-2.84519	99.2053	172.013	171.006	1	7.97538	0.76195	408924	430276	430301	438283	441720	391936	134615	142972	131147	122525	155809	49148.5	48101.7	350953	52340.2	47071.8	76433	1.98138e+06	242034	481361	79136.5	71330.5	1.89326e+06	1.33502e+06	1.42237e+06	69601.3		4.16312	0.302042	0.130713
7.05_345.0478n	L2	HMDB0001314	GUANOSINE 3',5'-CYCLIC MONOPHOSPHATE	1	Endogenous|Food	HMDB0011683|HMDB0011629|HMDB0001314|HMDB0001314	Molybdopterin precursor Z|Guanosine 2',3'-cyclic phosphate|Cyclic GMP|GUANOSINE 3',5'-CYCLIC MONOPHOSPHATE	31.7|34.9|34.9|73.5	4	M-H, M+Na-2H	C10H12N5O7P	54.7	1.05257	88.1635	345.048	344.041	1	7.04643	0.254167	41543.6	43581.2	43432.4	43457.3	43483.6	41377.1	22395	21812.3	23290.6	24675.8	18608.1	37421.4	45427.9	57691.3	34128.1	39223	42651.2	40242.7	37918.5	43195.1	40299.9	60604.7	58039.5	66093.8	62314.4	55300.9		1.84423	2.68e-06	6.77e-06
3.04_136.0378n	L2	HMDB0000157	HYPOXANTHINE	1	Endogenous|Food	HMDB0000157|HMDB0062620|HMDB0033054|HMDB0033053|HMDB0031160|HMDB0014581|HMDB0000943|HMDB0000613|HMDB0000157	HYPOXANTHINE|L-threonic Acid|Ethyl isopropyl disulfide|Ethyl propyl disulfide|1-Pentanesulfenothioic acid|Allopurinol|Threonic acid|Erythronic acid|Hypoxanthine	45.8|0.823|0|0|0|30.1|0.823|0.823|38.1	9	M-H, M+FA-H	C5H4N4O	49.5	-4.87074	94.4023	136.038	135.031	1	3.04435	0.42915	192751	198866	198054	197921	199201	192784	225576	228954	233333	235664	228637	200465	203639	221553	204476	194726	194118	185382	194228	210960	211045	196174	173543	183281	195677	191699		-1.1571	0.000573445	0.000646515
1.41_174.0556m/z	L2	HMDB0000197	INDOLE-3-ACETIC ACID	1	Endogenous|Food	HMDB0000197|HMDB0060758|HMDB0060389|HMDB0060366|HMDB0040972|HMDB0038628|HMDB0034250|HMDB0034244|HMDB0033731|HMDB0032388|HMDB0013292|HMDB0013245|HMDB0011723|HMDB0011664|HMDB0004073|HMDB0000859|HMDB0000821|HMDB0000197	INDOLE-3-ACETIC ACID|4-Anilino-4-oxobutanoic acid|4-Hydroxy-5-phenyltetrahydro-1,3-oxazin-2-one|3-Carbamoyl-2-phenylpropionaldehyde|1-Methoxy-1H-indole-3-carboxaldehyde|Hydroxymethyl indol-3-yl ketone|Betamipron|Isoquinoline|Quinoline|Methyl n-acetylanthranilate|p-Methylhippuric acid|m-Methylhippuric acid|2-Methylhippuric acid|3-Methylene-indolenine|5-Hydroxyindoleacetaldehyde|Methyl hippurate|Ph…	83.6|48.4|50.8|24.6|19.2|17.8|47.3|20.6|20.6|9.01|47.4|47.4|47.4|26|32.7|9.01|47.4|39.7	18	M-H	C10H9NO2	56.8	-2.87366	96.3486		174.056	1	1.41047	0.162033	4589.5	4717.73	4592.86	4648.1	4618.75	4765.13	4860.37	4854.27	5184.23	4984.94	5241.02	5486.75	5978.55	6112.11	5624.8	5916.35	3923.23	3718.95	3721.9	3880.87	3888.24	4724.39	4347.16	5003.09	5077.25	4717.14		-1.31315	7.31e-07	2.45e-06
4.14_267.0739m/z	L2	HMDB0000195	INOSINE	1	Endogenous|Food	HMDB0000195|HMDB0040410|HMDB0040263|HMDB0034377|HMDB0032409|HMDB0031521|HMDB0003040|HMDB0000481|HMDB0000195	INOSINE|Ethyl 3-mercaptopropanoic acid|Ethyl 2-(methylthio)acetate|Methyl 3-(methylthio)propanoate|Methyl 3-mercaptobutanoate|Ethyl 2-mercaptopropionate|Arabinosylhypoxanthine|Allopurinol riboside|Inosine	0|0|0|0|0|0|20|20|20	9	M-H	C10H12N4O5	38.2	1.41687	87.4069		267.074	1	4.14427	0.201867	17662.1	18304	17687.8	17390.3	18015	16847.1	41769.3	38401.2	40436.7	32655.3	35797.3	20895.1	27485.8	1566.4	20646.3	25775	32509.2	12.9531	6981.51	2762.78	17691.5	28653.2	0	41.6783	279.119	22803		-3.15321	0.0964634	0.0509128
8.72_173.1039m/z	L2	HMDB0000517	L-ARGININE	1	Endogenous|Food	HMDB0000517|HMDB0003416|HMDB0000517	L-ARGININE|D-Arginine|L-Arginine	0|52.2|52.2	3	M-H	C6H14N4O2	39.8	-2.64554	93.0023		173.104	1	8.72418	0.46885	123484	126329	126947	131027	131179	126342	96985.9	96310.8	98545	100860	103511	109373	117606	116233	118752	123978	148985	137079	140009	145131	151262	157874	159266	168144	164889	166219		1.45596	1.82e-07	8.96e-07
7.56_147.0525n	L2	HMDB0000148	L-GLUTAMIC ACID	1	Endogenous|Food	HMDB0000148|HMDB0062183|HMDB0060475|HMDB0033550|HMDB0006556|HMDB0003339|HMDB0003011|HMDB0002931|HMDB0002393|HMDB0000148	L-GLUTAMIC ACID|N-lactoyl-Glycine|DL-Glutamate|3-(Carboxymethylamino)propanoic acid|L-4-Hydroxyglutamate semialdehyde|D-Glutamic acid|O-Acetylserine|N-Acetylserine|N-Methyl-D-aspartic acid|L-Glutamic acid	84.8|31.1|33.5|31.1|33.9|33.5|33.3|30.8|31.3|33.5	10	M-H2O-H, M-H, 2M-H	C5H9NO4	56.9	-4.63868	94.0373	147.052	146.045	1	7.55928	0.424833	2.30415e+06	2.31966e+06	2.33859e+06	2.33434e+06	2.35806e+06	2.33461e+06	3.04502e+06	2.99926e+06	3.03526e+06	2.951e+06	3.18705e+06	2.49543e+06	2.40732e+06	2.07478e+06	2.58818e+06	2.33331e+06	2.62864e+06	2.52337e+06	2.10467e+06	2.72008e+06	2.97981e+06	3.54764e+06	2.37943e+06	1.55866e+06	1.29386e+06	1.65927e+06		-1.17451	0.0218372	0.0143616
7.47_145.0613m/z	L2	HMDB0000641	L-GLUTAMINE	1	Endogenous|Food	HMDB0000641|HMDB0006899|HMDB0003423|HMDB0002031|HMDB0000641	L-GLUTAMINE|Alanylglycine|D-Glutamine|Ureidoisobutyric acid|L-Glutamine	43.3|45.5|80|74.5|80	5	M-H	C5H10N2O3	48.6	-3.95603	93.5919		145.061	1	7.47172	0.24085	17625	17978.2	17797.9	17153.9	17256.3	16303.4	17523	19807.2	18691.5	18668.8	18959.4	15542.7	14889.4	13979.8	14584.2	13551.5	23785.7	16517.4	24640.4	23332.7	22327.8	20748.8	12072.6	16537.9	17185.6	18934.6		1.18104	0.0690426	0.0383379
8.74_154.0617m/z	L2	HMDB0000177	L-HISTIDINE	1	Food	HMDB0000177|HMDB0034267|HMDB0004225|HMDB0000177	L-HISTIDINE|L-2-Amino-3-(1-pyrazolyl)propanoic acid|2-Oxoarginine|L-Histidine	93.4|63|43.2|60.3	4	M-H	C6H9N3O2	58.8	-3.41272	92.5111		154.062	1	8.73732	0.2496	8109.78	8149.27	7771.26	7139.17	6843.4	7171.04	4283.54	4293.13	4574.25	4841.13	4617.73	8552.42	11184.5	23199.4	8021.26	8668.6	4830.14	10066.2	6542.57	6653.28	4978	8894.54	10963.7	10209.6	8870.27	6884.63		1.46265	0.0332245	0.0206449
4.66_164.0712m/z	L2	HMDB0000159	L-PHENYLALANINE	1	Food	HMDB0000159|HMDB0062515|HMDB0062407|HMDB0062402|HMDB0061679|HMDB0059934|HMDB0034169|HMDB0033589|HMDB0033485|HMDB0029455|HMDB0015652|HMDB0006044|HMDB0004992|HMDB0002832|HMDB0001007|HMDB0000819|HMDB0000159|HMDB0000068|HMDB0000068	L-PHENYLALANINE|Oxidized-adrenal-ferredoxin|5-(3-Pyridyl)-2-hydroxytetrahydrofuran|4-Hydroxy-1-(3-pyridinyl)-1-butanone|3,4,5,6-Tetrahydrohippuric acid|Benzyl glycinate|Methyl N-methylanthranilate|Ethyl 2-aminobenzoate|Gentiatibetine|Ginkgotoxin|Levonordefrin|Norsalsolinol|Benzocaine|Methylnoradrenaline|3-Pyridinebutanoic acid|Normetanephrine|L-Phenylalanine|Epinephrine|EPINEPHRINE	98.5|2.81|3.79|2.41|4.71|75.2|0|69.1|2.75|2.19|72.2|3.59|69.1|72.2|3.79|72.1|79.3|2.81|1.54	19	M-H	C9H11NO2	58.7	-2.84905	90.1273		164.071	1	4.661	0.4906	124078	126977	128763	124706	124291	117711	25304	22278.6	21800.3	27861.5	23427	139501	155173	159836	151833	173822	133375	119308	119117	135451	127594	192020	164642	184332	184769	177663		5.26094	1.06e-09	2.32e-08
7.55_104.0351m/z	L2	HMDB0000187	L-SERINE	1	Endogenous|Food	HMDB0000187|HMDB0062263|HMDB0031645|HMDB0003656|HMDB0003406|HMDB0001122|HMDB0000187	L-SERINE|Protein serine|Acetamide|Acetaldehyde oxime|D-Serine|N-Methylformamide|L-Serine	86.7|55|24.6|0|55|24.4|55	7	M-H	C3H7NO3	58.6	-2.13837	98.1803		104.035	1	7.54615	0.398567	25844.5	26051.5	25676.7	26115.7	26091.3	24872.9	15841.7	14885.6	15554.6	16503.1	17584.2	20187.2	23184.8	23441.5	19848.9	24258.4	34798.3	33167.7	31023.3	35423.1	32525.2	35199.3	32163.3	37433.6	33601.5	31746.4		2.07713	4.39e-08	3.14e-07
4.62_203.0824m/z	L2	HMDB0000929	L-TRYPTOPHAN	1	Food	HMDB0000929|HMDB0060967|HMDB0060878|HMDB0060533|HMDB0030396|HMDB0028995|HMDB0028848|HMDB0014892|HMDB0013840|HMDB0013609|HMDB0000929	L-TRYPTOPHAN|S-nirvanol|4-Hydroxyantipyrine|Nirvanol|(Â±)-Tryptophan|Phenylalanyl-Glycine|Glycyl-Phenylalanine|Ethotoin|3-Hydroxymethylantipyrine|D-Tryptophan|L-Tryptophan	79.3|2.49|0|1.74|42.6|28.7|26.4|0|10.5|42.6|42.6	11	M-H	C11H12N2O2	56.3	-0.93014	96.8664		203.082	1	4.61722	0.337183	15355.8	16288.8	15930	16087.2	15738.8	14167.9	2761.87	1339.17	1580.06	2624.37	1096.86	13027.7	15103.1	4279.43	9964.2	8616.24	13698.2	24772.5	4574.12	5437.12	16779.3	36063.3	23873.2	42532.3	36574	32493.4		6.94096	0.00133348	0.0013312
5.74_180.0662m/z	L2	HMDB0000158	L-TYROSINE	1	Endogenous|Food	HMDB0000158|HMDB0060280|HMDB0059720|HMDB0040224|HMDB0040223|HMDB0040222|HMDB0040013|HMDB0040008|HMDB0037072|HMDB0037071|HMDB0035177|HMDB0032630|HMDB0032628|HMDB0012883|HMDB0010715|HMDB0006050|HMDB0003831|HMDB0002184|HMDB0001250|HMDB0001119|HMDB0000158	L-TYROSINE|4,6,7-Trihydroxy-1,2,3,4-tetrahydroisoquinoline|Meta-Tyrosine|4-Acetyl-3-methylpyridine|4-Acetyl-2-methylpyridine|2-Acetyl-5-methylpyridine|5-(2-Furanyl)-3,4-dihydro-2H-pyrrole|2,3-Dihydro-1H-pyrrolizine-5-carboxaldehyde|2-Acetyl-6-methylpyridine|2-Acetyl-4-methylpyridine|2-Acetyl-1,5,6,7-tetrahydro-6-hydroxy-7-(hydroxymethyl)-4H-azepine-4-one|2'-Aminoacetophenone|2-Aminoacetophenone|A…	98.8|7.94|82.2|6.12|6.12|10.5|15.3|5.53|6.12|10.5|11.3|68.3|70.1|7.94|68|82.3|78|78|6.12|11.4|82.2	21	M-H	C9H11NO3	59.4	-2.12147	89.9329		180.066	1	5.74345	0.3023	105212	109358	109682	106815	105442	95666.8	30511.5	31604.5	32073.9	33293.1	34348.8	65560.1	67468.4	72746.3	65974.7	78848.1	135407	109106	146914	144899	137467	241851	161899	181569	182546	205022		4.16353	7.61e-09	9.91e-08
1.69_146.0573n	L2	HMDB0000752	METHYLGLUTARIC ACID	1	Endogenous|Food	HMDB0000752|HMDB0061930|HMDB0033837|HMDB0006900|HMDB0002173|HMDB0002074|HMDB0000858|HMDB0000752|HMDB0000448|HMDB0000422	METHYLGLUTARIC ACID|4-Ethoxy-4-oxobutanoic acid|Dimethyl succinate|(S)-2-Aceto-2-hydroxybutanoic acid|Solerol|2,2-Dimethylsuccinic acid|Monomethyl glutaric acid|Methylglutaric acid|Adipic acid|2-Methylglutaric acid	66.6|26.2|4.08|29.4|33.4|30.3|25|30.3|32.4|32.4	10	M-H, M-H2O-H	C6H10O4	53.8	-4.19467	98.5257	146.057	145.05	1	1.69073	0.350317	18892.1	19793.3	19740.2	19569.5	19471.9	17108.8	17498.5	16118.3	11994.7	10746	14184	9056.16	8531.57	9268.29	7985.56	6969.67	33661.4	27918.2	86297.1	35497.1	27275.3	23184.3	14940.5	23072.1	23482.1	22563		2.98617	0.00239569	0.00218684
5.16_174.0403m/z	L2	HMDB0000812	N-ACETYLASPARTIC ACID	1	Endogenous	HMDB0000267|HMDB0000812|HMDB0062585|HMDB0061093|HMDB0060273|HMDB0060262|HMDB0039163|HMDB0004816|HMDB0003470|HMDB0002234|HMDB0001843|HMDB0001369|HMDB0000812|HMDB0000805|HMDB0000267	PYROGLUTAMIC ACID|N-ACETYLASPARTIC ACID|(3R,5S)-1-pyrroline-3-hydroxy-5-carboxylic Acid|dimethadione|2-Amino-3-oxoadipate|5-Oxoprolinate|D-N-(Carboxyacetyl)alanine|FAPy-adenine|N-Formyl-L-glutamic acid|1-Pyrroline-4-hydroxy-2-carboxylate|N-Acryloylglycine|Pyrroline hydroxycarboxylic acid|N-Acetyl-L-aspartic acid|Pyrrolidonecarboxylic acid|Pyroglutamic acid	0|43.5|40.1|40.9|41.4|40.1|41.3|0.702|41.4|39.7|39.6|40.1|41.3|40.1|40.1	15	M-H	C6H9NO5	51.3	-2.60723	96.8281		174.04	1	5.16037	0.205817	2819.43	3432.2	3745.59	4995.44	5605.9	4113.97	5558.07	4568.4	5149.57	6209.36	5779.03	5979.69	6521.89	5114.84	7555.15	9266.27	1724	1544.99	1759.95	2746.58	2203.15	4203.7	3230.14	2116.94	1978.95	2372.47		-2.73227	2.11e-05	3.73e-05
4.61_189.0634n	L2	HMDB0001138	N-ACETYLGLUTAMATE	1	Endogenous	HMDB0001138|HMDB0001138|HMDB0000590	N-ACETYLGLUTAMATE|N-Acetylglutamic acid|Glutarylglycine	97.4|57.8|47	3	M-H2O-H, M-H	C7H11NO5	59.3	-1.76078	91.4796	189.063	188.056	1	4.61283	0.341567	189472	208625	196155	170696	166152	117712	123434	141226	100164	111953	169069	166737	176808	171704	176597	159737	110735	100489	100734	162262	130305	238167	227902	262882	237676	212052		-1.06835	0.619774	0.229729
1.79_172.0975m/z	L2	HMDB0011756	N-ACETYLLEUCINE	1	Endogenous	HMDB0011756|HMDB0061684|HMDB0040030|HMDB0031667|HMDB0011756|HMDB0002087|HMDB0000747|HMDB0000701	N-ACETYLLEUCINE|N-Acetylisoleucine|1-(1-Pyrrolidinyl)-2-propanone|Nor-psi-tropine|N-Acetylleucine|Isovalerylsarcosine|Isovalerylalanine|Hexanoylglycine	84.9|39.7|37.1|4.34|39.7|5.13|5.13|4.08	8	M-H	C8H15NO3	58.2	-2.66232	97.1356		172.097	1	1.79145	0.2058	5884.99	5955.39	5892.02	5978.59	5996.68	5978.35	4789.22	4477.32	4894.32	4706.62	4612.2	5678.34	6262.53	6842.23	5819.62	6719.52	5267.3	5033.94	4606.55	5804.14	5263.77	6479.02	6942.24	8505.22	8091.73	6834.29		1.10631	0.040659	0.0243294
1.86_206.0820m/z	L2	HMDB0000512	N-ACETYLPHENYLALANINE	1	Endogenous	HMDB0000512|HMDB0142154|HMDB0061682|HMDB0060608|HMDB0040048|HMDB0040042|HMDB0040028|HMDB0030267|HMDB0003447|HMDB0002042|HMDB0000860|HMDB0000512	N-ACETYLPHENYLALANINE|(2S)-2-amino-3-(4-hydroxy-3-methoxyphenyl)-2-methylpropanoic acid|2-Acetamido-4-methylphenyl acetate|N-isopropylterephthalamic acid|3,4-Dihydro-4-[(5-methyl-2-furanyl)methylene-2H-pyrrole|3-[(5-Methyl-2-furanyl)methyl-1H-pyrrole|1-(2,3-Dihydro-1H-pyrrolizin-5-yl)-2-propen-1-one|(R)-Boschniakine|Tryptophanol|3-Phenylpropionylglycine|Phenylpropionylglycine|N-Acetyl-L-phenylala…	89.7|1.12|66|0|41.5|41.4|0|0|0|1.17|3.6|69.8	12	M-H	C11H13NO3	61.8	-1.08591	94.9678		206.082	1	1.8615	0.148883	1834.97	1909.58	1830.02	1923.42	1831.52	1871.15	796.709	597.361	751.957	761.435	727.092	1995.54	2326.91	2478.89	2016.34	2334.91	1709.2	1860.99	1459.85	1859.39	1810.35	2250.82	2470.5	2684.84	2538.23	2416.8		2.39363	1.23e-06	3.75e-06
5.17_146.0453m/z	L2	HMDB0002931	N-ACETYLSERINE	1	Endogenous|Food	HMDB0002931|HMDB0062183|HMDB0060475|HMDB0033550|HMDB0006556|HMDB0003339|HMDB0003011|HMDB0002931|HMDB0002393|HMDB0000148	N-ACETYLSERINE|N-lactoyl-Glycine|DL-Glutamate|3-(Carboxymethylamino)propanoic acid|L-4-Hydroxyglutamate semialdehyde|D-Glutamic acid|O-Acetylserine|N-Acetylserine|N-Methyl-D-aspartic acid|L-Glutamic acid	51|9.61|10.3|9.61|23.8|10.3|8.16|23.5|4|10.3	10	M-H	C5H9NO4	50.2	-4.10645	96.664		146.045	1	5.16913	0.258367	2431.52	2748.94	2877.13	3641.23	3888.84	3218.89	1797.11	1309.84	1787.59	1882.98	1703.28	3237.2	3397.6	2983.57	3559.44	4683.6	2726.93	2392.41	1898.95	2071.27	3484.76	4827.75	6606.99	7796.49	7787.83	5291.34		1.48268	0.0164519	0.0113174
7.00_187.1085m/z	L2	HMDB0000446	N-ALPHA-ACETYLLYSINE	1	Endogenous	HMDB0000446|HMDB0029120|HMDB0028929|HMDB0028907|HMDB0028844|HMDB0028700|HMDB0000759|HMDB0000446|HMDB0000206	N-ALPHA-ACETYLLYSINE|Valyl-Alanine|Leucyl-Glycine|Isoleucyl-Glycine|Glycyl-Isoleucine|Alanyl-Valine|Glycylleucine|N-Alpha-acetyllysine|N6-Acetyl-L-lysine	88.6|9.95|9.03|9.03|8.65|8.35|8.65|41.9|42.4	9	M-H	C8H16N2O3	59.1	-1.62514	96.4753		187.109	1	6.99808	0.202017	3729.44	4053.73	3895.47	3728.22	3813.82	3309.42	7767.24	7912.17	7086.73	7881.61	9008.07	1966.28	2165.6	1920.95	2058.78	1853.29	2795.01	1886.42	2857.2	3475.22	3483.95	3465.38	2849.5	2670.54	2714.47	3367.67		-2.7353	2.41e-05	4.18e-05
3.18_162.0416m/z	L2	HMDB0000802	PTERIN	1	Endogenous|Food	HMDB0000802|HMDB0031187|HMDB0006037|HMDB0000802	PTERIN|Thialdine|8-Hydroxy-7-methylguanine|Pterin	82.6|0|37.1|36.6	4	M-H	C6H5N5O	60.1	-3.1205	94.7454		162.042	1	3.18448	0.3153	2877.68	2866.47	2826.52	2874.51	2930.84	2735.59	2871.7	2604.66	2436.53	2769.94	2387.77	1967.79	2253.25	2155.36	2022.28	1978.83	4131.2	5788.29	4544.86	5851.57	4126.23	3667.27	2143.59	2160.2	2781.74	3558.92		1.87001	9.55e-05	0.000139565
3.76_150.0526n	L2	HMDB0000283	RIBOSE	1	Endogenous|Food	HMDB0000283|HMDB0127617|HMDB0094694|HMDB0060254|HMDB0059753|HMDB0029942|HMDB0029941|HMDB0012325|HMDB0003371|HMDB0001644|HMDB0000751|HMDB0000646|HMDB0000621|HMDB0000366|HMDB0000283|HMDB0000098	RIBOSE|3-hydroxy-2,2-bis(hydroxymethyl)propanoic acid|beta-Arabinose|Aldehydo-D-xylose|2-Deoxypentonic acid|D-Arabinose|D-Apiose|Arabinofuranose|L-Ribulose|D-Xylulose|L-Threo-2-pentulose|L-Arabinose|D-Ribulose|2-Deoxyribonic acid|D-Ribose|D-Xylose	71.7|2.18|8.7|8.69|7.48|7.27|7.5|8.7|8.61|6.05|6.05|8.7|6.05|7.48|8.69|8.69	16	M-H2O-H, M-H, M+FA-H	C5H10O5	63.2	-1.78487	99.2624	150.053	195.051	1	3.76263	0.635333	62343.3	64496.6	64622.6	63623.2	62859.8	59260.8	47237.3	48820.1	46521.7	49576.5	47740	44393.4	48150.7	107840	47716.3	50247.8	37353.5	98213	71499.8	81217.9	38763.6	34860.3	90200.2	102139	105105	44621.1		1.36329	0.267275	0.118978
1.46_173.0814m/z	L2	HMDB0000893	SUBERIC ACID	1	Endogenous|Food	HMDB0000893|HMDB0060684|HMDB0059876|HMDB0059757|HMDB0059727|HMDB0041606|HMDB0040591|HMDB0040214|HMDB0039819|HMDB0038962|HMDB0038271|HMDB0033838|HMDB0033793|HMDB0032460|HMDB0032391|HMDB0031681|HMDB0031603|HMDB0031593|HMDB0031504|HMDB0031500|HMDB0031484|HMDB0031477|HMDB0031476|HMDB0031351|HMDB0031342|HMDB0031174|HMDB0030330|HMDB0029314|HMDB0029165|HMDB0002023|HMDB0000893	SUBERIC ACID|2-Propylglutaric acid|Pantolactone|3-Methylpimelic acid|2,4-Dimethyladipic acid|Dimethyl adipate|Allyl butyrate|cis-3-Hexenyl formate|2,4-Dimethyl-2-pentenoic acid|Ethyl tiglate|2-Hexenyl formate|Diethyl succinate|4-Heptenoic acid|4-Pentenyl acetate|3-Methyl-3-butenyl acetate|Dihydro-5-propyl-2(3H)-furanone|Ethyl 4-pentenoate|5-Methyl-2,3-hexanedione|Methyl (Z)-3-hexenoate|Methyl 2E-…	65.5|24.5|21.6|23.2|23.2|0.252|21.6|19.1|21.4|21.4|19.1|4.17|22|23.7|22.3|24.2|21.6|22.3|19.1|19.1|22|20.2|22.3|20.4|24|25|20.2|22.3|23.3|24.5|23.2	31	M-H	C8H14O4	55.7	-2.97727	94.2935		173.081	1	1.45863	0.376583	5598.44	5441.64	5569.21	5531.87	5779.56	5550.47	11911.8	5308.52	4399.91	3753.05	5966.09	4636.24	3368.86	5456.44	3897.6	3842.22	4800.97	5271.64	5322	5965.99	4616.55	3561.58	5894.31	4373.79	4616.67	6058.67		-1.20642	0.624935	0.230618
7.31_321.0497m/z	L2	HMDB0001227	THYMIDINE 5'-MONOPHOSPHATE	1	Endogenous|Food	HMDB0001227|HMDB0062560|HMDB0001227	THYMIDINE 5'-MONOPHOSPHATE|thymidine 3'-monophosphate|5-Thymidylic acid	96.5|63.1|64	3	M-H	C10H15N2O8P	61.3	1.09097	97.163		321.05	1	7.31393	0.714383	176721	186309	185086	184461	186162	168738	223800	213715	199758	214411	232992	232067	227809	227363	254273	231723	256342	113650	216157	242140	268733	150830	98985.6	102583	93806.5	138441		1.01138	0.85353	0.290905
2.17_242.0906n	L2	HMDB0000273	THYMIDINE	1	Endogenous|Food	HMDB0000273|HMDB0015394|HMDB0000273	THYMIDINE|Telbivudine|Thymidine	31.7|2.86|2.86	3	M-H, M+FA-H	C10H14N2O5	53.6	1.41861	95.5728	242.091	287.089	1	2.16803	0.262733	19227.7	18327	18289.8	18006.9	18116.3	18967.7	11679.7	12895.6	14365.5	13861.7	12841.8	28469.2	28694.1	35776.6	29542.7	29880.2	11507.5	24188.4	19035.2	28492.8	12959.6	12209.6	15590.5	13095.2	10882.7	7192.19		1.46522	0.105508	0.0549057
8.17_324.0362n	L2	HMDB0000288	URIDINE-5-MONOPHOSPHATE	1	Endogenous|Food	HMDB0000288|HMDB0060282|HMDB0011641|HMDB0001271|HMDB0000288	URIDINE-5-MONOPHOSPHATE|3'-UMP|Uridine 2'-phosphate|Pseudouridine 5'-phosphate|Uridine 5'-monophosphate	0|50.3|50|51|50.8	5	M-H, 2M-H	C9H13N2O9P	41.5	0.888069	98.3182	324.036	323.029	1	8.16805	0.766317	1.15146e+06	1.18411e+06	1.17365e+06	1.20914e+06	1.20506e+06	1.15755e+06	1.55336e+06	1.47564e+06	1.43021e+06	1.49526e+06	1.38165e+06	1.06902e+06	1.05196e+06	1.02117e+06	1.02071e+06	1.01143e+06	2.06796e+06	1.76891e+06	2.18098e+06	2.01319e+06	2.09476e+06	1.21848e+06	815447	835685	892853	1.16099e+06		1.38027	4.97e-05	7.83e-05
2.36_137.0350m/z	L2	HMDB0000301	UROCANATE	1	Endogenous|Food	HMDB0000301|HMDB0062719|HMDB0062562|HMDB0061680|HMDB0034174|HMDB0031338|HMDB0002730|HMDB0002320|HMDB0001014|HMDB0000544|HMDB0000301	UROCANATE|5-(2-carboxylatoethyl)-4-oxo-4,5-dihydro-1H-imidazol-5-ide|Trans-urocanate|2-Aminonicotinic acid|(E)-Urocanic acid|5-Oxo-2(5H)-isoxazolepropanenitrile|Nicotinamide N-oxide|Imidazolelactic acid|4-Imidazolone-5-propionic acid|5-Hydroxymethyl-4-methyluracil|Urocanic acid	59.8|23.3|26.6|26.6|26.6|25.7|0|27.2|23.3|1.01|26.6	11	M-H	C6H6N2O2	55.5	-4.94376	96.8902		137.035	1	2.35633	0.253983	5231.63	5244.95	5317.56	5436.62	5234.97	4976.29	1391.35	873.175	1086.69	1331.21	883.651	5210.86	7596.35	16468.2	3925.06	3745.3	1952	2859.62	2129.84	2816.68	2260.13	4992.11	10726.2	12926.6	10167.4	5139.54		2.1592	0.00024524	0.000316344
3.34_152.0328n	L2	HMDB0000292	XANTHINE	1	Endogenous|Food	HMDB0000292|HMDB0001182|HMDB0000786|HMDB0000292	XANTHINE|6,8-Dihydroxypurine|Oxypurinol|Xanthine	94.6|15.9|12.9|12.9	4	M-H, 2M-H	C5H4N4O2	60.2	-3.93813	95.0199	152.033	151.026	1	3.33775	0.402867	192227	200277	196955	190712	197113	185815	181978	187420	188393	192707	218794	190388	190278	200336	211681	181758	141220	280067	151921	168330	156142	187195	220324	238222	245401	204006		-1.07977	0.41967	0.169334
7.86_190.0830m/z	L2	HMDB0029384	4-Hydroxycitrulline	1	Endogenous|Food	HMDB0029384|HMDB0003464	4-Hydroxycitrulline|4-Guanidinobutanoic acid	53.2|21.1	2	M-H	C6H13N3O4	48.7	-1.67624	92.1499		190.083	1	7.85715	0.346017	10203.4	10287.5	10420	10592.9	10800.4	10571.6	1926.49	1310.82	2180.59	1194.66	12556.9	28941.6	31164.8	4548.53	38056.9	23009.4	219.765	0	20.9744	0	570.72	40870.9	7789.01	3055.43	2736.47	29254.3		-23.6235	0.0105067	0.00774882
9.43_540.0548m/z	L2	HMDB0001178	Adenosine diphosphate ribose	1	Endogenous	HMDB0012276|HMDB0001178	Phosphoribosyl-AMP|Adenosine diphosphate ribose	33.7|90.6	2	M-H2O-H	C15H23N5O14P2	56.9	1.64499	95.6822		540.055	1	9.43473	0.46955	214421	219945	219405	220598	223862	206891	271871	268310	267078	272856	277446	220433	209717	212786	220686	210005	224621	229477	221502	219195	242323	209464	191036	192774	198704	198729		-1.19386	1.39e-05	2.67e-05
10.25_425.0815m/z	L2	HMDB0000656	Cysteineglutathione disulfide	1	Endogenous	HMDB0032299|HMDB0000656	Glyceryl lactopalmitate|Cysteineglutathione disulfide	5.18|77.6	2	M-H	C13H22N4O8S2	52.6	2.02631	87.7012		425.081	1	10.2468	0.4781	493401	517224	519948	541767	536349	472859	738034	749843	757971	812300	951071	644545	582200	493662	617022	601842	913468	355874	640651	555302	760836	365235	111433	163704	219304	555678		-1.24273	0.156777	0.0763529
9.06_784.1532m/z	L2	HMDB0001248	FAD	1	Endogenous|Food	HMDB0001248	FAD	59.6	1	M-H	C27H33N9O15P2	49	4.288	90.3461		784.153	1	9.05728	0.381633	41806.5	46170	44502.4	44971.4	43123.4	40132.2	43029.4	58731	49911	53353.5	46937.5	30481.1	27741.3	72590.4	22759.7	21750.5	28022	67599.3	48353.3	52118.1	32724.9	23687	68671.2	58585.1	64117.2	18023.2		-1.10115	0.428117	0.171912
7.87_330.1311m/z	L2	HMDB0002171	Glycylprolylhydroxyproline	1	Endogenous	HMDB0014484|HMDB0002171	Metixene|Glycylprolylhydroxyproline	0|25.3	2	M+FA-H	C12H19N3O5	44	1.44138	96.4612		330.131	1	7.8659	0.33725	18953.5	19377.3	19547.9	19899.7	20117.3	18967.3	10636.8	11662.3	13772.3	13621.9	9769.17	24844.9	30731	28106.1	24125.7	30513.2	14503	11100.4	13804.2	13787.9	13704.1	23008.4	19634.2	25540.1	22208.3	25476.3		1.12507	0.17338	0.0830666
3.05_466.2581m/z	L2	HMDB0000712	Hexadecanedioic acid mono-L-carnitine ester	1	Endogenous|Food	HMDB0041421|HMDB0038568|HMDB0000712	Sarcodon scabrosus Depsipeptide|PC-M6|Hexadecanedioic acid mono-L-carnitine ester	0.255|2.25|51.8	3	M+K-2H	C23H43NO6	48.7	1.15081	93.0681		466.258	1	3.04873	0.709917	56315.7	58546.4	57155.6	59048.7	58460.3	56699.5	53319.1	73774	80999.5	63562.2	76400.2	127692	129502	731.937	174073	154226	18456	0	2479.17	364.162	24199.9	68185.2	38.3449	1593.55	1887.44	127807		-7.64969	0.0499216	0.0288805
7.92_337.0447m/z	L2	HMDB0006032	Imidazoleacetic acid ribotide	1	Endogenous	HMDB0006032	Imidazoleacetic acid ribotide	34.9	1	M-H	C10H15N2O9P	45.3	1.43856	93.1501		337.045	1	7.91845	0.297767	7980.22	7983.63	7991.82	8158.15	7927.25	7883.36	4954.43	4562.4	4449.86	4689.93	4613.27	4053.97	3907.3	3418.57	4096.08	4315.82	17528.8	23821.6	15006.8	15622.1	18895.7	11384.8	5714.33	6785.99	10683	14173.6		3.90526	2.27e-07	1.04e-06
10.01_297.0457n	L2	HMDB0000709	L-Cysteinylglycine disulfide	1	Endogenous	HMDB0000709	L-Cysteinylglycine disulfide	63.9	1	M-H, M+Na-2H	C8H15N3O5S2	51.3	1.16707	93.8393	297.046	296.038	1	10.0135	0.496133	55973.9	60296.5	59763.8	56550.1	53458.6	44167.6	141783	167408	144269	148589	141522	47503.5	49219	45686.9	36653.6	37732.3	101005	19850.7	112713	61603.9	56992.9	8784.74	4022.72	5794.28	8752.93	16566.8		-2.11143	0.0194796	0.0130421
9.70_240.0240n	L2	HMDB0000192	L-Cystine	1	Endogenous|Food	HMDB0000192	L-Cystine	44.8	1	M-H, 2M-H, M+Na-2H	C6H12N2O4S2	45.7	0.55463	84.5194	240.024	239.017	1	9.70262	0.4343	165847	173296	174325	181516	177817	158860	617492	572477	545119	552059	497545	169819	146184	129685	144896	140909	117805	17955.4	104629	64964.3	70850	15296.3	4654.39	7628.23	13470.3	39163.2		-7.4021	0.000197341	0.000261974
8.31_182.0125m/z	L2	HMDB0002205	L-Homocysteic acid	1	Endogenous	HMDB0002205	L-Homocysteic acid	64.2	1	M-H	C4H9NO5S	50.7	-1.8908	91.5634		182.013	1	8.31255	0.214567	3391.34	3511.96	3413.69	3425.3	3393.29	3370.98	5397.26	5784.87	5817	5172.73	6794.26	3307.44	3488.1	2989.19	3914.57	3908.37	4154.27	424.291	3151.1	3537.45	5238.51	3969.04	1136.72	1059.43	1661.05	3605.49		-1.75492	0.108165	0.0559975
6.79_502.2320m/z	L2	HMDB0010380	LysoPC(14:1)	1	Endogenous|Food	HMDB0010380	LysoPC(14:1(9Z))	29.6	1	M+K-2H	C22H44NO7P	43.9	-4.6844	95.4785		502.232	1	6.78722	0.267833	13941.2	14410.9	14280.4	14313.7	15213.3	12826.6	14876.4	13631	14691.3	14959.8	15672.3	24741.7	28592	26951.9	28270.8	26966.5	2662.09	2682.15	2569.23	3586.28	3406.33	8076.08	8812.65	11573.6	9878.25	9843.53		-4.95306	1.98e-08	1.84e-07
4.50_152.0824m/z	L2	HMDB0013253	N-Acetylhistamine	1	Endogenous|Food	HMDB0013253	N-Acetylhistamine	34.5	1	M-H	C7H11N3O	44.3	-3.82299	91.5285		152.082	1	4.49898	0.25835	1942.26	2011.51	2008.09	1956.1	1958.54	2022.94	0	0	0	0	0	0	0	0	0	0	382.261	14441.2	2082.69	3577.25	489.655	245.823	4456.92	7033	7211.4	378.795		Infinity	1.8e-06	5.01e-06
7.94_393.1535m/z	L2	HMDB0032055	N-Acetylhistidine	1	Endogenous|Food	HMDB0032055	N-Acetylhistidine	36.5	1	2M-H	C8H11N3O3	45.9	1.67633	95.0173		393.153	1	7.94472	0.166417	7236.19	7374.67	7178.33	7606.76	7836.33	7726.16	5014.58	4752.58	5543.76	5540.69	3814.91	8953.54	11747.3	10965	8163.09	10381.5	10048.3	4446.34	7663.69	6912.91	8986.11	13409.6	7178.58	8742.09	7682.81	12418.5		1.54287	0.0319992	0.0200326
7.21_173.0927m/z	L2	HMDB0003357	N-Acetylornithine	1	Endogenous|Food	HMDB0094702|HMDB0034365|HMDB0029127|HMDB0028854|HMDB0003357	Gly-Norvaline|L-Theanine|Valyl-Glycine|Glycyl-Valine|N-Acetylornithine	15.7|15.7|16.2|15.7|34.7	5	M-H	C7H14N2O3	45.5	-2.55924	95.8167		173.093	1	7.21283	0.188683	2283.84	2404.55	2416.7	2421.59	2584.21	2209.69	2762.67	2885.11	2804.07	2935.87	3366.86	2948.04	2658.73	3947.46	3567.83	4278.74	1191.67	1381.97	1559.97	1905.94	1385.78	1579.35	1766.15	1593.83	1784.38	1771.79		-1.98706	3.92e-05	6.39e-05
7.85_140.0112m/z	L2	HMDB0000224	O-Phosphoethanolamine	1	Endogenous|Food	HMDB0000224	O-Phosphoethanolamine	31.8	1	M-H	C2H8NO4P	44.6	-4.60317	96.5056		140.011	1	7.85277	0.170767	1343.43	1327.64	1327.4	1330.22	1331.3	1280.45	854.388	873.756	845.89	745.927	803.713	530.087	515.189	1940.79	558.423	433.552	796.381	2729.36	970.034	1484.34	793.9	658.205	2608.34	2568.06	2623.81	616.316		1.64271	0.150545	0.0740447
10.46_612.1536n	L2	HMDB0003337	Oxidized glutathione	1	Endogenous|Food	HMDB0003337	Oxidized glutathione	81.6	1	M-H, M+Na-2H	C20H32N6O12S2	54.2	2.66879	92.4708	612.154	611.146	1	10.4617	0.49155	1.35686e+06	1.43474e+06	1.46595e+06	1.58862e+06	1.61912e+06	1.47139e+06	277199	277892	336009	371855	421882	843954	903089	724260	978314	965034	1.93793e+06	2.59686e+06	1.68673e+06	2.17375e+06	2.43243e+06	3.10574e+06	2.44364e+06	2.66232e+06	2.97585e+06	2.83346e+06		6.42657	1.85e-07	8.97e-07
8.06_1030.2919m/z	L2	HMDB0006508	Retinoyl CoA	1	Endogenous|Food	HMDB0006508	Retinoyl CoA	31	1	M-H2O-H	C41H62N7O17P3S	42.5	-3.65437	85.8657		1030.29	1	8.05858	0.2277	305817	313627	308121	330422	305127	312494	101856	101833	109464	99808.7	189201	339074	353331	295448	368398	336243	58985.7	13648.6	46513.3	50554.7	95560.6	350800	247932	240066	254186	338503		-2.27006	0.0242973	0.0157348
11.23_402.9955m/z	L2	HMDB0000295	Uridine 5'-diphosphate	1	Endogenous|Food	HMDB0000295	Uridine 5'-diphosphate	65.4	1	M-H	C9H14N2O12P2	51.6	1.48814	94.6438		402.996	1	11.2254	2.53802	84327.8	89137.7	86960	84587.1	84750.7	70810.3	58073.4	54485	50344.1	56347.3	53406.4	100118	81269.7	91709.9	88233.5	82612.7	101616	114255	105229	124313	104759	118596	110542	112723	120990	120417		2.01782	2.46e-07	1.07e-06
4.14_544.1390n	L3	HMDB0033422	(2S,2''S,3S,3''R,4S)-3,4',5,7-Tetrahydroxyflavan(2->7,4->8)-3,4',5,7-tetrahydroxyflavan	1	Food	HMDB0033422	(2S,2''S,3S,3''R,4S)-3,4',5,7-Tetrahydroxyflavan(2->7,4->8)-3,4',5,7-tetrahydroxyflavan	26.7	1	M-H, M+Na-2H	C30H24O10	41.6	3.81132	85.7052	544.139	543.132	1	4.14427	0.1884	58904.1	57927.6	57700.9	54788.3	57320.5	53256.8	65061.1	71526.4	61341.6	70917	71547.5	54609.9	49953.5	53915.5	54842.2	45969.1	65741.4	68488.6	76730	70870.6	71612.2	50038.4	50132.7	40605.3	46406.7	50108.4		1.03834	0.371763	0.153527
7.13_275.0890m/z	L3	HMDB0039110	(2S,3'S)-alpha-Amino-2-carboxy-5-oxo-1-pyrrolidinebutanoic acid	1	Food	HMDB0042036|HMDB0039110|HMDB0038753|HMDB0038752|HMDB0032796|HMDB0031701|HMDB0029756|HMDB0029013|HMDB0028818|HMDB0028761|HMDB0011737|HMDB0002335	Thymidine glycol|(2S,3'S)-alpha-Amino-2-carboxy-5-oxo-1-pyrrolidinebutanoic acid|Distichonic acid B|Distichonic acid A|Methyl 3-(2,3-dihydroxy-3-methylbutyl)-4-hydroxybenzoate|1-(gamma-Glutamylamino)cyclopropanecarboxylic acid|(1R,2S,3R)-2-Acetyl-4(5)-(1,2,3,4-tetrahydroxybutyl)imidazole|Prolyl-Aspartate|Glutamylglutamic acid|Aspartyl-Proline|gamma-Glutamylglutamic acid|Aspartyl-L-proline	16.1|35.1|13.5|10.9|0.0493|9.1|3.34|4.31|5.84|13.7|7.77|13.7	12	M+FA-H	C9H14N2O5	45.8	2.1088	96.5432		275.089	1	7.12963	0.645083	17656.5	19062.5	18491.2	18045.7	18260.1	15555.1	10030.2	10798	9584.45	10077.9	13009.9	20993.6	20031.1	20224.5	23089.1	19303.1	11421.7	10092.6	11709.7	12645.3	12216.6	29474.8	22120.9	24522.2	27600.7	28191.3		1.08571	0.233837	0.10658
7.52_353.0372m/z	L3	HMDB0001409	2'-DEOXYURIDINE 5'-MONOPHOSPHATE	1	Endogenous|Food	HMDB0001409	2'-DEOXYURIDINE 5'-MONOPHOSPHATE	0	1	M+FA-H	C9H13N2O8P	38.5	-6.29104	89.9812		353.037	1	7.5155	0.0875667	675.181	733.659	686.761	685.003	820.491	1184.12	3337.37	2883.56	3447.96	3082.97	3403.09	1847.41	1604.67	935.986	1828.83	1626.53	864.564	857.234	966.776	843.357	900.453	1182.47	549.683	194.389	131.429	572.827		-3.64476	1.32e-09	2.7e-08
8.31_152.0017m/z	L3	HMDB0000996	3-SULFINOALANINE	1	Endogenous	HMDB0060179|HMDB0000996	3-Sulfinato-L-alaninate|3-SULFINOALANINE	46.8|0	2	M-H	C3H7NO4S	38.6	-3.75163	88.721		152.002	1	8.30818	0.569267	5590.67	5620.57	5456.47	5937.49	5804.65	6385.22	7962.21	7820.8	7245.86	7932.75	6481.89	8099.61	9276.55	11124.8	6220.27	5925.07	3629.91	3422.58	5462.64	4029.5	3865.95	4382.52	2242.83	2291.97	2807.19	6003.11		-1.83451	0.000131192	0.000184161
1.92_144.0660m/z	L3	HMDB0003681	4-ACETAMIDOBUTANOATE	1	Endogenous|Food	HMDB0094698|HMDB0061156|HMDB0059595|HMDB0035359|HMDB0032862|HMDB0029426|HMDB0029425|HMDB0015127|HMDB0012151|HMDB0012131|HMDB0011727|HMDB0003681|HMDB0001263|HMDB0000808|HMDB0000730|HMDB0003681	N-Propionylalanine|N-(2-Carboxymethyl)-morpholine|(S)-2-amino-6-oxohexanoate|1-Deoxynojirimycin|2-Amino-4-ethoxy-3-hydroxybutanoic acid|L-trans-5-Hydroxy-2-piperidinecarboxylic acid|L-cis-4-(Hydroxymethyl)-2-pyrrolidinecarboxylic acid|Methyl aminolevulinate|2-Keto-6-aminocaproate|(S)-5-Amino-3-oxohexanoate|Bicine|4-Acetamidobutanoic acid|Allysine|N-Butyrylglycine|Isobutyrylglycine|4-ACETAMIDOBUTA…	0|0|0|0|0|0|0|0|0|0|0|0|0|0|0|0	16	M-H	C6H11NO3	42.8	-4.27173	93.4756		144.066	1	1.92282	0.122617	566.923	619.112	579.781	577.39	615.721	562.666	2329.91	351.99	314.669	386.797	363.336	506.285	597.442	625.405	551.08	607.429	554.783	331.937	392.833	446.088	530.47	512.9	600.992	645.897	584.862	588.032		-1.66069	0.710646	0.253385
8.98_225.0993m/z	L3	HMDB0000033	CARNOSINE	1	Endogenous|Food	HMDB0001325|HMDB0028878|HMDB0028689|HMDB0000033|HMDB0000033	N,N,N-TRIMETHYLLYSINE|Histidinyl-Alanine|Alanyl-Histidine|Carnosine|CARNOSINE	0|0|0|0|0	5	M-H	C9H14N4O3	40.6	0.10725	94.2401		225.099	1	8.9828	0.236917	2266.21	2269.5	2276.04	2266.97	2275.56	2176.19	3254.25	3502.97	3331.92	3627.98	3316.47	1079.82	1177.94	1561.38	1014.09	1132.54	2289.08	2195.79	2375.15	2335.54	2177.98	2659.46	2432.67	2773.07	2844.32	2452.74		-1.49765	3.18e-07	1.3e-06
4.63_115.0030m/z	L3	HMDB0000134	FUMARATE	1	Endogenous|Food	HMDB0000134	FUMARATE	0	1	M-H	C4H4O4	39	-5.99148	95.2267		115.003	1	4.63473	0.197067	642.139	659.817	628.651	536.356	515.682	521.724	1233.42	852.395	674.55	848.581	754.753	786.507	841.935	870.699	821.64	615.502	185.774	214.698	225.436	323.391	262.538	256.602	299.678	254.046	236.431	300.771		-3.60089	1.56e-05	2.91e-05
9.70_241.0126m/z	L3	HMDB0001401	GLUCOSE 6-PHOSPHATE	1	Endogenous	HMDB0129373|HMDB0060467|HMDB0041031|HMDB0039820|HMDB0036346|HMDB0035086|HMDB0030789|HMDB0006873|HMDB0006814|HMDB0006800|HMDB0006797|HMDB0006330|HMDB0006328|HMDB0003971|HMDB0003498|HMDB0002985|HMDB0001586|HMDB0001401|HMDB0001313|HMDB0001125|HMDB0001078|HMDB0001076|HMDB0000994|HMDB0000645|HMDB0000213|HMDB0000124|HMDB0001401|HMDB0001586|HMDB0000645	2-(4-methoxy-1-benzofuran-5-yl)-2-oxoacetic acid|D-fructose 1-phosphate|3,5,6-Trihydroxy-5-(hydroxymethyl)-2-methoxy-2-cyclohexen-1-one|8-Methoxy-6,7-methylenedioxycoumarin|7-Hydroxy-2-methyl-4-oxo-4H-1-benzopyran-5-carboxylic acid|Buntansin A|Dracunculin|D-Tagatose 6-phosphate|1D-myo-Inositol 3-phosphate|Beta-D-Fructose 2-phosphate|Sorbose 1-phosphate|D-Mannose 1-phosphate|D-Tagatose 1-phosphate…	0|0|0|0|0|0|0|0|0|0|0|0|0|0|0|0|0|0|0|0|0|0|0|0|0|0|0|0|0	29	M-H2O-H	C6H13O9P	42.1	2.60423	96.4567		241.013	1	9.70262	0.320433	13760.2	14383.9	14660.2	15130.6	14941.7	13176	52041.6	48083	46217	47143.2	41756.4	13948.3	12067.8	10542.9	11917.9	11462.1	9760.52	1996.96	8703.93	5441.14	5912.38	1793.18	1550.27	1417.48	1678.97	3552.28		-7.39405	6.71e-05	0.000102384
1.83_131.0343m/z	L3	HMDB0000661	GLUTARATE	1	Endogenous|Food	HMDB0127617|HMDB0094694|HMDB0060254|HMDB0059753|HMDB0029942|HMDB0029941|HMDB0012325|HMDB0003371|HMDB0001644|HMDB0000751|HMDB0000646|HMDB0000621|HMDB0000366|HMDB0000283|HMDB0000098|HMDB0000661|HMDB0000622	3-hydroxy-2,2-bis(hydroxymethyl)propanoic acid|beta-Arabinose|Aldehydo-D-xylose|2-Deoxypentonic acid|D-Arabinose|D-Apiose|Arabinofuranose|L-Ribulose|D-Xylulose|L-Threo-2-pentulose|L-Arabinose|D-Ribulose|2-Deoxyribonic acid|D-Ribose|D-Xylose|GLUTARATE|ETHYLMALONIC ACID	36.8|31.2|31.2|37.2|11.2|31.3|31.2|11.6|10.5|10.5|31.2|10.5|37.2|31.2|31.2|84.1|41.5	17	M-H	C5H8O4	57	-5.28316	97.8042		131.034	1	1.83085	0.28025	7016.96	6886.43	6923.39	7024.94	7107.35	8447.18	8037.07	6810.24	7581.48	6415.11	6817.28	5143.01	5327.84	6655.53	5015.53	5089.58	5138.82	5809.51	5948.7	6351.9	4872.43	6379.88	7333.96	7439.29	7745.22	7447.76		-1.26812	0.00558738	0.00452718
7.12_74.0248m/z	L3	HMDB0000123	GLYCINE	1	Endogenous|Food	HMDB0031239|HMDB0014691|HMDB0000123|HMDB0000123	Ethyl nitrite|Acetohydroxamic Acid|Glycine|GLYCINE	0|0|0|0	4	M-H	C2H5NO2	41.1	0.336477	97.9977		74.0248	1	7.11648	0.289567	3181.51	3305.13	3275.56	3177.21	3234.26	3099.61	4161.58	4160.97	3959	4142.27	4243.33	4046.3	4137.58	4235.61	4179.07	4034.55	2545.55	1904.77	2336.06	2510.82	2378.09	2961.68	2419.38	2500.37	2462.36	2769.91		-1.77016	4.81e-06	1.11e-05
4.26_150.0415m/z	L3	HMDB0000132	GUANINE	1	Endogenous|Food	HMDB0000542|HMDB0000403|HMDB0000132|HMDB0000132	8-Hydroxyadenine|2-Hydroxyadenine|Guanine|GUANINE	0|0|0|0	4	M-H	C5H5N5O	41.8	-3.92101	92.9588		150.042	1	4.26252	0.28465	4068.88	4259.21	4143.69	4358.28	4529.06	4166.98	4150.04	4070.11	4157.64	3811.8	2887.59	1802.37	1997.75	4527.41	1597.77	1575.31	1391.73	2810.82	2149.14	5581.71	1787.2	1645.4	13068.8	10505.6	8406.13	1662.93		-1.3904	0.110875	0.0570178
8.34_347.0403m/z	L3	HMDB0000175	INOSINIC ACID	1	Endogenous|Food	HMDB0000175|HMDB0131885|HMDB0131884|HMDB0131883|HMDB0130175|HMDB0129456|HMDB0129357|HMDB0129351|HMDB0128632|HMDB0128631|HMDB0128630|HMDB0128629|HMDB0128214|HMDB0126017|HMDB0126016|HMDB0125361|HMDB0125217|HMDB0125206|HMDB0125010|HMDB0062708|HMDB0041689|HMDB0041687|HMDB0036632|HMDB0033264|HMDB0030796|HMDB0029620|HMDB0011681|HMDB0005794|HMDB0001439|HMDB0000175	INOSINIC ACID|3,5,7-trihydroxy-6-methoxy-2-(2,4,5-trihydroxyphenyl)-4H-chromen-4-one|3,5,7-trihydroxy-6-methoxy-2-(2,3,4-trihydroxyphenyl)-4H-chromen-4-one|3,5,7-trihydroxy-6-methoxy-2-(3,4,5-trihydroxyphenyl)-4H-chromen-4-one|5,6,7,8-tetrahydroxy-2-(4-hydroxyphenyl)-4H-chromen-4-one|2-(2,5-dihydroxy-4-methoxyphenyl)-3,5,6,7-tetrahydroxy-4H-chromen-4-one|5,7-dihydroxy-3-(2,4,5-trihydroxyphenyl)-4…	0|0|0|0|0|0|0|0|0|0|0|0|0|0|0|0|0|0|0|0|0|0|0|0|0|0|0|0|0|0	30	M-H	C10H13N4O8P	39.7	1.39517	91.6069		347.04	1	8.33883	0.2715	8990.16	9025.33	9207.46	8993.87	9331.37	9117.03	6714.88	6355.54	6084.32	7478.53	5313.78	8736.63	8487.33	7266.38	8384.45	8936.11	16106.8	8173.77	18559.3	10490.3	11453.3	12421.6	7037.61	8652.33	9256.02	16739.9		2.02784	0.0028969	0.00256947
1.98_129.0550m/z	L3	HMDB0000695	KETOLEUCINE	1	Endogenous|Food	HMDB0000695|HMDB0059705|HMDB0059629|HMDB0031639|HMDB0012140|HMDB0000227	KETOLEUCINE|(2-Methoxyethoxy)propanoic acid|(R)-mevalonate|Glycerol 1-propanoate|(R) 2,3-Dihydroxy-3-methylvalerate|Mevalonic acid	6.35|5.33|5.34|0|0|5.34	6	M-H	C6H10O3	51.1	-5.29326	95.1643		129.055	1	1.97537	0.402867	3376.48	3499.16	3396.3	3610.72	3680.28	3466.03	1187.31	1003.19	1279.58	1086.69	967.426	834.914	890.078	5335.2	882.572	994.71	1261.51	3857.52	1770.85	2386.76	1144.08	1983.65	11070.4	13812.6	11065.8	1767.44		1.88638	0.0459464	0.0268676
6.78_88.0404m/z	L3	HMDB0000161	L-ALANINE	1	Endogenous|Food	HMDB0000271|HMDB0000161|HMDB0062251|HMDB0031219|HMDB0001310|HMDB0000271|HMDB0000161|HMDB0000056|HMDB0000056	SARCOSINE|L-ALANINE|(alpha-D-mannosyl)7-beta-D-mannosyl-diacetylchitobiosyl-L-asparagine, isoform A (protein)|Ethyl carbamate|D-Alanine|Sarcosine|L-Alanine|beta-Alanine|BETA-ALANINE	0|0|0|0|0|0|0|0|0	9	M-H	C3H7NO2	41.4	0.473603	97.6486		88.0404	1	6.78283	0.192967	1190.07	1261.86	1273.45	1183.97	1203.3	1131.36	861.06	892.531	828.111	851.313	1048.47	990.313	979.273	973.049	1140.81	926.598	1547.11	1716.96	1566.51	1805.29	1587.77	1807.32	1575.26	1491.49	1441.09	1433.93		1.83503	2.38e-06	6.28e-06
7.73_131.0455m/z	L3	HMDB0000168	L-ASPARAGINE	1	Endogenous|Food|Synthetic	HMDB0000168	L-ASPARAGINE	63.1	1	M-H	C4H8N2O3	53	-5.13342	95.4866		131.046	1	7.7257	0.275967	2200.02	2334.65	2377.73	2526.22	2591.09	2509.15	3493.64	3497.74	3766.47	3712.31	3739.1	1786.76	1869.94	1610.76	1750.15	2062.04	2618.5	2082.48	2163.44	2094.82	2200.41	2472.42	2299.65	3011.7	2652.72	2705.02		-1.63171	4.5e-06	1.05e-05
8.23_132.0296m/z	L3	HMDB0000191	L-ASPARTIC ACID	1	Endogenous|Food	HMDB0000191	L-ASPARTIC ACID	95.8	1	M-H	C4H7NO4	59.3	-5.09503	94.6456		132.03	1	8.22935	0.420367	70280.7	71110.8	69822.4	68729.6	67971.3	68509.6	96376.2	97654.8	101235	97928.4	104424	97344.4	92591.7	91225.4	91010.1	86600.9	44001.9	30822.4	90659.6	44953.8	41499.7	61358.2	45769.7	54287.3	44833.8	40337.3		-1.97517	0.0029734	0.00262802
4.80_229.0619m/z	L3	HMDB0000684	L-KYNURENINE	1	Endogenous|Food	HMDB0000684|HMDB0060826|HMDB0060537|HMDB0004185	L-KYNURENINE|Hydroxynalidixic acid|p-Hydroxyphenobarbital|5-Hydroxyindoleacetylglycine	0|40.4|8.48|41	4	M+Na-2H	C10H12N2O3	40.8	11.4964	97.8465		229.062	1	4.80113	0.657017	13926.6	15248.7	15261.7	15265.6	15171	12005.4	11993.8	6346.88	5248.06	9318.99	7308.53	28784.2	35917.3	37966.9	44141.1	74185.7	5790.87	3270.69	9076.73	9209.2	5508.85	6155.87	4176.05	3281.26	4058.57	20379.9		-1.224	0.3702	0.153008
5.34_148.0432m/z	L3	HMDB0000696	L-METHIONINE	1	Endogenous|Food	HMDB0000696|HMDB0033951|HMDB0014997|HMDB0000696	L-METHIONINE|Racemethionine|Penicillamine|L-Methionine	0|2.58|2.58|2.58	4	M-H	C5H11NO2S	39.2	-4.11992	89.3028		148.043	1	5.34428	0.390333	11946.2	12382.7	12186.7	12116.8	12501.6	11833	1857.94	1555.38	1432.37	1517.6	788.425	1943.35	2895.11	22319.2	1456.97	1946.01	2931.9	22274.8	7033.22	14305.5	3029.47	12857.4	41404.1	46510.5	40478.8	2816.45		6.9319	0.00492518	0.00404293
1.87_115.0030m/z	L3	HMDB0000176	MALEIC ACID	1	Endogenous|Food	HMDB0000176	MALEIC ACID	47.5	1	M-H	C4H4O4	49.8	-6.01062	96.6087		115.003	1	1.86588	0.223333	1416.81	1380.25	1489.92	1445.66	1481.18	1883.78	14453.6	487.972	421.039	483.462	514.51	277.528	292.381	378.17	254.733	334.965	918.435	631.363	439.679	1061.21	364.803	182.386	713.882	554.916	492.173	1279.51		-4.7901	0.588245	0.220736
7.98_225.0615m/z	L3	HMDB0000211	MYOINOSITOL	1	Endogenous|Food	HMDB0000211|HMDB0240292|HMDB0240211|HMDB0240210|HMDB0240209|HMDB0240208|HMDB0240207|HMDB0125599|HMDB0062538|HMDB0062473|HMDB0062202|HMDB0062138|HMDB0061922|HMDB0034220|HMDB0033704|HMDB0032222|HMDB0012326|HMDB0006088|HMDB0003449|HMDB0003418|HMDB0003345|HMDB0001266|HMDB0001151|HMDB0000660|HMDB0000516|HMDB0000346|HMDB0000211|HMDB0000169|HMDB0000143|HMDB0000122	MYOINOSITOL|2,3,4,5,6,7-Hexahydroxyheptanoic acid|allo-inositol|cis-inositol|D-chiro-inositol|neo-inositol|epi-Inositol|2,5-bis(hydroxymethyl)oxolane-2,3,4-triol|Fructose-1P|Glycoprotein-phospho-D-mannose|3(S)-hydroxy-all-cis-8,11,14,17-eicosatetraenoyl-CoA|muco-Inositol|Alpha-D-Glucopyranoside|Levoinositol|L-Galactose|Dihydroxyacetone (dimer)|L-Gulose|scyllo-Inositol|Beta-D-Galactose|D-Tagatose|…	0|8.13|7.86|7.86|7.86|7.86|7.86|8.28|7.86|7.86|8.55|7.86|8.55|7.86|8.55|8.31|8.55|7.86|8.55|7.86|8.55|7.86|8.55|7.86|8.55|8.49|7.86|8.55|8.55|8.55	30	M+FA-H	C6H12O6	41.1	-0.326093	96.4838		225.062	1	7.98413	0.162017	3458.05	3584.38	3677.24	3919.22	3632.88	3707.1	3330.99	3322.85	3822.74	3630.05	3104.65	4702.78	5303.08	4762.12	4882.66	5561.37	3624.6	2390.06	2966.47	2987.52	3361.64	4621.85	3178.73	4117.16	3805.16	4236.53		-1.1227	0.161302	0.0782904
3.81_116.0346m/z	L3	HMDB0000532	N-ACETYLGLYCINE	1	Endogenous	HMDB0000532	N-ACETYLGLYCINE	0	1	M-H	C4H7NO3	39.2	-5.90527	95.2449		116.035	1	3.81087	0.170917	673.162	707.155	728.987	730.833	741.99	675.655	699.43	686.73	753.429	659.562	716.586	949.96	912.168	983.026	970.725	981.499	571.248	431.028	523.606	557.986	603.533	719.858	616.006	675.403	698.716	795.246		-1.30823	0.0022752	0.00208827
2.16_190.0540m/z	L3	HMDB0011745	N-ACETYLMETHIONINE	1	Endogenous	HMDB0011745|HMDB0011745	N-ACETYLMETHIONINE|N-Acetyl-L-methionine	0|0	2	M-H	C7H13NO3S	42.9	-1.68829	89.5822		190.054	1	2.16365	0.1664	1606.49	1524.79	1497.81	1508.23	1551.73	1396.53	5.26189	0	0	0	4.33192	0	0	1667.61	11.819	0	42.3945	4850.58	1458.98	4345.15	190.333	944.235	5548.92	6307.36	5671.34	0		1134.84	0.000346166	0.00042467
2.67_122.0241m/z	L3	HMDB0001488	NICOTINATE	1	Endogenous|Food	HMDB0001488|HMDB0001280	NICOTINATE|2-Aminomuconic acid semialdehyde	23.3|16.4	2	M-H	C6H5NO2	49.5	-5.49823	92.9988		122.024	1	2.6717	0.32455	17077.9	17714.7	17372.5	17221.6	17285.2	15945.4	9688	9777.93	9618.03	10423.3	9570.24	18607.5	21092.2	26654.2	20394.5	20635.8	10566.1	26253.6	14992.6	14335.6	10123.8	18474.1	27035	24532	23652.8	17687.3		1.55411	0.058064	0.0329725
1.30_215.1651m/z	L3	HMDB0002059	OMEGA-HYDROXYDODECANOIC ACID	1	Endogenous|Food	HMDB0002059|HMDB0040169|HMDB0034856|HMDB0033713|HMDB0032379|HMDB0032371|HMDB0031065|HMDB0031064|HMDB0031016|HMDB0030943|HMDB0030941|HMDB0010728|HMDB0002059|HMDB0000387	OMEGA-HYDROXYDODECANOIC ACID|xi-5-Hydroxydodecanoic acid|2-Undecen-1-ol|2-Undecanone|trans- and cis-1-Methoxy-1-decene|1-Menthyl methyl ether|(Â±)-(E)-3-Methyl-4-decen-1-ol|(Z)-3-Methyl-3-decen-1-ol|10-Undecen-1-ol|6-Undecanone|Undecanal|(R)-3-Hydroxydodecanoic acid|12-Hydroxydodecanoic acid|3-Hydroxydodecanoic acid	0|0|0|0|0|0|0|0|0|0|0|0|0|0	14	M-H	C12H24O3	42.7	-0.540162	94.4496		215.165	1	1.301	0.188283	3895.23	3803.65	3844.07	3903.22	3939.04	3541.51	3687.34	3780.8	3364.24	3644.18	3411.64	3506.3	3615.18	5141.04	3643.74	3451.72	2843.58	4183.06	3822.66	3261.52	2271.16	1844.14	4222.76	2953.87	2697.42	2393.37		-1.09194	0.350895	0.146601
5.06_128.0346m/z	L3	HMDB0000267	PYROGLUTAMIC ACID	1	Endogenous|Food	HMDB0000267|HMDB0002931|HMDB0062183|HMDB0060475|HMDB0033550|HMDB0006556|HMDB0003339|HMDB0003011|HMDB0002931|HMDB0002393|HMDB0000148	PYROGLUTAMIC ACID|N-ACETYLSERINE|N-lactoyl-Glycine|DL-Glutamate|3-(Carboxymethylamino)propanoic acid|L-4-Hydroxyglutamate semialdehyde|D-Glutamic acid|O-Acetylserine|N-Acetylserine|N-Methyl-D-aspartic acid|L-Glutamic acid	0|0|0|1.49|0|1.49|1.49|1.49|0|0|1.49	11	M-H	C5H7NO3	39.6	-5.35686	94.0049		128.035	1	5.05527	0.280417	239140	252031	247049	233891	217375	202000	16008	14014.4	12963.1	13362.9	30588.1	18732.8	16512.9	16237.5	17206.5	16426.1	308985	280304	213518	343762	295523	438154	547555	630023	518765	449835		16.5879	2.35e-07	1.05e-06
7.74_383.1149m/z	L3	HMDB0000939	S-ADENOSYLHOMOCYSTEINE	1	Endogenous|Food	HMDB0000939|HMDB0139010|HMDB0135551|HMDB0135549|HMDB0135547|HMDB0135545|HMDB0135228|HMDB0135227|HMDB0135225|HMDB0135223|HMDB0135221|HMDB0135219|HMDB0135217|HMDB0134903|HMDB0131487|HMDB0130343|HMDB0130342|HMDB0129094|HMDB0129093|HMDB0125991|HMDB0125990|HMDB0125989|HMDB0125988|HMDB0125986|HMDB0040934|HMDB0040837|HMDB0040813|HMDB0040134|HMDB0039634|HMDB0039617|HMDB0039379|HMDB0038950|HMDB0038902|HMD…	S-ADENOSYLHOMOCYSTEINE|7,14-dihydroxy-6-methoxy-4,12-dimethyl-5-(3-methylbut-2-enoyl)-2,9-dioxatricyclo[9.4.0.0Â³,â¸pentadeca-1(11),3(8),4,6,12,14-hexaen-10-one|3,4,5-trihydroxy-6-[2-(2-oxo-3-phenylpropyl)phenoxyoxane-2-carboxylic acid|3,4,5-trihydroxy-6-[4-(2-oxo-3-phenylpropyl)phenoxyoxane-2-carboxylic acid|3,4,5-trihydroxy-6-[3-(2-oxo-3-phenylpropyl)phenoxyoxane-2-carboxylic acid|3,4,5-trihyd…	0|0|0|0|0|0|0|0|0|0|0|0|0|0|0|0|0|0|0|0|0|0|0|0|0|0|0|0|0|0|0|0|0|0|0|0|0|0|0|0|0|0|0|0|0|0|0|0|0|0|0|0|0|0|0|19.2	56	M-H	C14H20N6O5S	39.3	1.55771	88.6745		383.115	1	7.73883	0.197133	5419.16	5511.77	5520.66	5411.88	5422	5010.66	3070.61	2882.42	2075.78	3162.61	1610.65	2434.16	3472.83	8170.6	1367.6	1539.88	6755.02	7739.48	7407.48	7404.56	6460.19	9224.39	9308.17	9688.72	9294.81	5743.49		2.79382	5.23e-05	8.19e-05
1.98_118.0259n	L3	HMDB0000254	SUCCINIC ACID	1	Endogenous|Food	HMDB0000254	SUCCINIC ACID	95.9	1	M-H2O-H, M-H, 2M-H	C4H6O4	59.5	-6.3126	99.9175	118.026	117.019	1	1.97537	0.319667	781873	796628	792336	799823	801479	790409	906216	1.02784e+06	1.0672e+06	995262	881952	827248	774155	752616	782041	769612	634732	749882	907270	831244	797960	1.03299e+06	730600	695261	694179	680067		-1.24416	0.0130078	0.00926611
4.42_283.0687m/z	L3	HMDB0000299	XANTHOSINE	1	Endogenous|Food	HMDB0000299|HMDB0031360|HMDB0000469|HMDB0000299	XANTHOSINE|L-cis-Cyclo(aspartylphenylalanyl)|5-Hydroxymethyluracil|Xanthosine	0|0|0|0	4	M-H	C10H12N4O6	39.7	1.13875	92.0152		283.069	1	4.42455	0.192683	2997.83	3525.8	3146.57	3389.29	3453.4	2407.06	1493.62	1072.12	845.46	1593.05	599.065	2971.96	3828.48	8756.86	1636.09	2690.56	2677.34	4791.98	2638.37	2568.24	2127.47	4268.1	5621.66	6702.63	6586.03	4268.67		2.6419	0.00240875	0.00219078
15.90_256.9554m/z	L3	HMDB0059917	1,2-Ethanediyldicarbamodithioic acid	1		HMDB0059917	1,2-Ethanediyldicarbamodithioic acid	23.9	1	M+FA-H	C4H8N2S4	40.7	0.916773	80.5528		256.955	1	15.903	2.92185	418256	400441	417240	445543	476934	574070	567404	514364	660547	579202	496145	403083	401924	381700	421908	435687	509607	522767	483468	438774	490336	453673	455271	420211	435479	444546		-1.15244	0.045407	0.0266193
8.15_481.2424m/z	L3	HMDB0010351	11-beta-Hydroxyandrosterone-3-glucuronide	1	Endogenous|Food	HMDB0010351	11-beta-Hydroxyandrosterone-3-glucuronide	24.1	1	M-H	C25H38O9	41.5	-4.0117	88.1638		481.242	1	8.14615	0.2102	13990.6	13915	14360.6	14496.5	13363.9	12996.4	9313.43	9576.36	10173.5	9930	9006.4	16942.2	18638.9	19205	16521.8	19876.6	11579.7	10428.5	10784.4	11243.5	10142.7	14624.5	14363.6	18919.1	16178.1	15573.9		1.12873	0.00587976	0.0047183
2.20_546.2825m/z	L3	HMDB0061698	1-Stearoylglycerophosphoserine	1	Endogenous|Food	HMDB0061698|HMDB0011518|HMDB0011517|HMDB0011488|HMDB0011487	1-Stearoylglycerophosphoserine|LysoPE(20:4(8Z,11Z,14Z,17Z)/0:0)|LysoPE(20:4(5Z,8Z,11Z,14Z)/0:0)|LysoPE(0:0/20:4(8Z,11Z,14Z,17Z))|LysoPE(0:0/20:4(5Z,8Z,11Z,14Z))	59.1|1.74|1.76|3.19|3.21	5	M+Na-2H	C24H48NO9P	50.1	2.2278	94.258		546.283	1	2.20307	0.481683	74945.9	68000.6	68638.8	71064.5	70497.2	87057.6	83097.3	81082.5	88107.6	80246	72754.2	64490.4	64649.9	59209.9	60214.4	55525.1	96709.1	28140	101576	97840.2	100531	74900	22864.4	55081.3	56674.7	72872.3		1.04814	0.853167	0.290905
7.85_405.1397m/z	L3	HMDB0033063	2,3-Butanediol apiosylglucoside	1	Food	HMDB0039473|HMDB0038381|HMDB0037028|HMDB0034627|HMDB0034626|HMDB0033063	2'-Methoxy-3-(2,4-dihydroxyphenyl)-1,2-propanediol 4'-glucoside|2-(4-Hydroxy-3,5-dimethoxyphenyl)ethanol 4'-glucoside|Deoxyloganic acid|1-(3,4-Dimethoxyphenyl)-1,2-ethanediol 2-O-b-D-glucoside|1-(3,4-Dimethoxyphenyl)-1,2-ethanediol 1-O-b-D-glucoside|2,3-Butanediol apiosylglucoside	0|0|0.102|0|0|40.6	6	M+Na-2H	C15H28O11	45.5	4.90883	92.636		405.14	1	7.85277	0.214667	36041.6	35136.6	36082.8	34575	34842.2	35789.2	5583.35	3978.22	5488.97	3337.61	35977.3	63608.2	66496.8	16958	81199.1	42530.7	631.428	0	110.706	32.2547	1593.48	95399.7	23711.4	9004.66	8069.08	68084.7		-22.9596	0.0147715	0.0103029
8.64_483.2946m/z	L3	HMDB0030987	2-Carboxy-4-dodecanolide	1	Endogenous|Food	HMDB0038736|HMDB0038540|HMDB0038539|HMDB0030987	(3S,5R,6R,7E)-3,5,6-Trihydroxy-7-megastigmen-9-one|Goshonoside F2|Goshonoside F1|2-Carboxy-4-dodecanolide	0|0|0|20.8	4	2M-H	C13H22O4	41.9	-3.65758	93.1372		483.295	1	8.64098	0.232083	10145.9	10509.5	10491.1	10906.7	10262.3	9582.83	4730.39	5028.7	5312.62	5234.09	4325.26	11142.7	13832.8	13931.5	11340.9	13855.1	9380.04	8543.28	8370.5	9113.96	8508.94	14294.5	13120	16403.3	14694.1	13874.7		1.78298	9.81e-07	3.11e-06
3.36_317.1357m/z	L3	HMDB0041551	3,8-Dihydroxy-6-methoxy-7(11)-eremophilen-12,8-olide	1	Endogenous|Food	HMDB0041551|HMDB0039376|HMDB0038120	3,8-Dihydroxy-6-methoxy-7(11)-eremophilen-12,8-olide|Methyl dihydrophaseate|Ovalicin	21.7|6.29|6.05	3	M+Na-2H	C16H24O5	42.1	-4.47165	93.8729		317.136	1	3.35527	0.24085	16288.1	17862	16906.1	16713	17382.5	14221.4	20830	18382.5	18418.1	21902.9	20635.8	30480.4	38039.7	26917.4	36278.5	34658.1	9328.94	8419.32	8366.12	9322.57	9394.74	10973.7	8487.15	8078.12	8228.36	12747.8		-2.23434	8.45e-08	4.81e-07
1.21_489.2786m/z	L3	HMDB0037065	3-Oxo-12,18-ursadien-28-oic acid	1	Endogenous|Food	HMDB0037065|HMDB0035888	3-Oxo-12,18-ursadien-28-oic acid|Tyromycic acid	64.3|0	2	M+K-2H	C30H44O3	50.6	2.1289	91.2761		489.279	1	1.20903	0.18845	15065.8	15405.8	15974.5	15967.8	15185.8	11983	20062.1	19650.6	13140.3	15455.8	16795.4	11938.1	10313.8	17219.7	12821.1	12859.9	13314.2	23187.5	17580	18519.2	15264.7	12457.5	22613.8	15118.1	20493.9	10212.3		1.03245	0.834449	0.286507
3.03_354.0198m/z	L3	HMDB0061102	3-oxobrimonidine	1	Endogenous	HMDB0061102|HMDB0060726	3-oxobrimonidine|2,8-bis-Trifluoromethyl-4-quinoline carboxylic acid	30.1|0	2	M+FA-H	C11H12BrN5O	35.2	-3.03266	49.3198		354.02	1	3.02683	0.284633	57478	57847.5	57155.6	56104	57883.3	57070.2	56709.5	48573.9	48870.3	56279.4	48067.8	58929.7	59895.5	63056.9	63443.3	60045.8	58008.9	82183.8	66159.6	48443	47564.6	45760.2	66756.3	66198.7	71152	66415.6		1.16967	0.23955	0.108641
7.78_303.0950m/z	L3	HMDB0062179	AICA-riboside	1		HMDB0062179|HMDB0061146|HMDB0034073|HMDB0032943|HMDB0029115|HMDB0029073	AICA-riboside|Hydroxy-lacosamide|Vicine|Diazinon|Tyrosyl-Threonine|Threoninyl-Tyrosine	57.1|8.57|6.29|0|9.01|6.62	6	M+FA-H	C9H14N4O5	50.4	1.40261	96.3454		303.095	1	7.77832	0.258433	8773.65	8795.81	8773.39	8797.73	8840.47	9212.69	4834.97	4914.13	4334.34	5311.47	3765.72	4601.33	5201.94	3834.13	3807.35	3686.11	24288.1	7871.19	20945.3	25992.6	25298	23572.4	9891.74	3570.12	3264.7	19939.7		4.50744	0.000286612	0.000359532
3.36_397.0636m/z	L3	HMDB0039720	a-L-threo-4-Hex-4-enopyranuronosyl-D-galacturonic acid	1	Food	HMDB0039720	a-L-threo-4-Hex-4-enopyranuronosyl-D-galacturonic acid	28.4	1	M+FA-H	C12H16O12	43.8	3.49279	94.9489		397.064	1	3.35527	0.210183	5832.38	5587.87	5356.69	5533.1	5878.09	7190.18	9280.02	9116.76	10191.3	9405.85	8444.88	6667.91	6698.85	4141.81	6851.06	6264.59	6478.12	1852.67	5681.62	3665.86	6016.76	4516.21	1163.6	1115.8	1642.28	5766.57		-1.95985	0.01187	0.00856499
4.25_425.2049m/z	L3	HMDB0014905	Benzquinamide	1		HMDB0014905	Benzquinamide	67.7	1	M+Na-2H	C22H32N2O5	51.4	-2.10884	91.8674		425.205	1	4.25377	0.271517	60823.1	63117.9	61458	65021.7	65043.3	58896.3	45974.5	43888.6	47706.6	47928.8	42583.1	69864.5	81211.3	81275.3	73129.6	87167.8	58462.1	43243.5	50536.7	54193.2	53212.8	80952.9	70138.4	78885.3	75302.9	78292.4		1.1384	0.0527801	0.0303328
10.30_548.1845m/z	L3	HMDB0041224	beta-D-Galactopyranosyl-(1->4)-2-amino-2-deoxy-beta-D-glucopyranosyl-(1->6)-D-mannose	1	Food	HMDB0041224|HMDB0015381	beta-D-Galactopyranosyl-(1->4)-2-amino-2-deoxy-beta-D-glucopyranosyl-(1->6)-D-mannose|Gliquidone	92.5|0	2	M+FA-H	C18H33NO15	57.7	2.50661	98.824		548.184	1	10.3038	0.306783	478289	466714	476309	488203	485088	485697	62714.9	65414.7	73755	61155.5	112327	1.19209e+06	1.08297e+06	1.06054e+06	1.18948e+06	1.05553e+06	443.467	44.5902	221.9	209.624	392.475	471858	444832	438291	470933	395894		-286.091	7.16e-07	2.43e-06
2.02_403.1839m/z	L3	HMDB0030452	Blasticidin S	1	Endogenous|Food	HMDB0034266|HMDB0030452|HMDB0029047|HMDB0029026|HMDB0028856|HMDB0028688	L-Coprine|Blasticidin S|Serylproline|Prolyl-Serine|Hydroxyprolyl-Alanine|Alanyl-Hydroxyproline	0.075|55.2|0|0|0|0	6	M-H2O-H	C17H26N8O5	48.8	-1.96457	91.1482		403.184	1	2.02353	0.2496	19177.1	21363.1	20564.7	18625.4	20746.1	14537.3	12161.6	13602.7	12970.6	13957.1	14777.5	24721.1	29263.1	30212.5	26512.8	27640.5	14214.7	10477.1	17068.5	19504.9	13677.1	27980.5	19797	28849.8	28128.9	26176.4		1.11076	0.46286	0.182788
7.16_254.0261m/z	L3	HMDB0038592	Brassicanal B	1	Food	HMDB0038592|HMDB0015328	Brassicanal B|Captopril	23.2|2.12	2	M+Na-2H	C12H11NO2S	42.8	1.50037	92.7881		254.026	1	7.1559	0.429833	17176.3	14922	14966.8	14604.1	14771.4	20521.3	21823.2	22411	24872.9	22094.2	20688.6	16380	14584	13930.4	16596.5	13907.2	18439.4	18434.4	20437.6	18741.3	20584.1	12923.8	12926.4	9746.29	10821.5	13679.2		-1.15784	0.00576746	0.00465053
8.21_391.0166m/z	L3	HMDB0015485	Ceftibuten	1		HMDB0031789|HMDB0015485	(Acetyloxy)triphenylstannane|Ceftibuten	0|51.3	2	M-H2O-H	C15H14N4O6S2	45.9	-2.5331	81.2609		391.017	1	8.21183	0.31965	24005.3	21696.5	20900.1	21767.6	21188	29824.6	38655.6	38534.3	44101.5	37978.5	31885.5	17996.4	17497.6	17010.5	18452.3	17931.6	44479.9	40877.6	45760.4	39789.4	47300.8	15159.4	14088	12557.8	14243.5	17732.5		1.14152	0.0583406	0.0331108
1.48_301.0059m/z	L3	HMDB0060984	dapsone hydroxylamine	1	Endogenous	HMDB0060984	dapsone hydroxylamine	59	1	M+K-2H	C12H12N2O3S	50.1	1.77802	93.8355		301.006	1	1.48492	0.148883	7225.3	8123.64	7154.43	9320.71	9965.29	12769.8	958.031	1100.91	2051.6	1271.24	1051.49	841.605	857.968	880.752	865.933	874.205	1257.53	1329.87	1065.26	1207.27	1230.2	908.191	962.515	892.204	1101.27	1077.84		-1.05634	0.90147	0.302283
5.73_360.1306m/z	L3	HMDB0041208	De-O-methylsimmondsin	1	Food	HMDB0041208	De-O-methylsimmondsin	34.4	1	M-H	C15H23NO9	45.5	1.61738	95.1275		360.131	1	5.7347	0.19275	12330.1	13381.3	13461.4	13199.6	12695.5	10239	2611.26	2593.25	2654.14	2906.78	3271.62	9017.79	10206.8	11320.2	9530.79	12395.6	12285.5	9647.7	13078.7	15433.1	11847	24858.5	17324	22544	20747	21485.4		4.43768	1.56e-07	7.9e-07
7.89_503.1770m/z	L3	HMDB0039852	Deoxynivalenol 3-glucoside	1	Endogenous|Food	HMDB0039930|HMDB0039852|HMDB0038161|HMDB0037603|HMDB0037108|HMDB0029909	(S)-Multifidol 2-[apiosyl-(1->6)-glucoside]|Deoxynivalenol 3-glucoside|Pterosin J|Eugenol O-[a-L-Arabinofuranosyl-(1->6)-b-D-glucopyranoside]|3-Hydroxychavicol 1-[rhamnosyl-(1->6)-glucoside]|Gein	0|64.7|0|0|0|0	6	M+FA-H	C21H30O11	51	-0.0499467	90.2821		503.177	1	7.8878	0.192667	89638.9	89933.1	94144.4	105545	109378	112656	65334.3	56450.9	67651.2	67249	72348.3	68167.1	70132.1	101730	75837.9	71981.4	106445	118870	120622	116985	116632	120320	84485.5	84241.3	97771.6	105831		1.76138	1.87e-06	5.18e-06
9.43_662.1039m/z	L3	HMDB0039421	Fenugreekine	1	Food	HMDB0125194|HMDB0125112|HMDB0039421|HMDB0029240	[(6-{[2-(3,4-dihydroxyphenyl)-7-hydroxy-5-oxo-5H-chromen-3-yl]oxy}-3,4,5-trihydroxyoxan-2-yl)methyl][1-hydroxy-3-(4-hydroxy-3-methoxyphenyl)prop-2-en-1-ylidene]oxidanium|[3-(3,4-dihydroxyphenyl)-1-hydroxyprop-2-en-1-ylidene][(3,4,5-trihydroxy-6-{[7-hydroxy-2-(4-hydroxy-3-methoxyphenyl)-5-oxo-5H-chromen-3-yl]oxy}oxan-2-yl)methyl]oxidanium|Fenugreekine|Pinotin A	0.922|0.659|86.8|2.97	4	M-H	C21H27N7O14P2	55.9	3.1368	96.4271		662.104	1	9.43473	0.5221	2.77688e+06	2.85279e+06	2.8712e+06	2.86223e+06	2.8637e+06	2.6595e+06	3.49408e+06	3.53644e+06	3.43175e+06	3.50701e+06	3.62932e+06	2.8923e+06	2.74554e+06	2.78114e+06	2.88014e+06	2.71604e+06	2.90448e+06	2.96723e+06	2.90318e+06	2.86197e+06	3.14271e+06	2.67057e+06	2.49104e+06	2.48629e+06	2.54464e+06	2.57646e+06		-1.19074	1.48e-05	2.79e-05
9.07_317.1107m/z	L3	HMDB0060950	fluvoxamino acid	1	Endogenous	HMDB0060950|HMDB0015038	fluvoxamino acid|Methdilazine	40.8|0	2	M-H	C14H17F3N2O3	46	-3.73727	93.6538		317.111	1	9.06605	0.219617	8116.33	8671.71	8872.51	9282.42	9071.48	8419.94	714.043	699.239	709.018	765.495	848.789	5843.97	6202.11	5654.21	6962.08	6908.41	4364.82	6432.37	4040.83	5312.87	5506.11	20998.1	22901.4	22781.9	20203.4	18376.1		6.86643	2.72e-08	2.31e-07
8.96_390.0327m/z	L3	HMDB0038419	Glucotropaeolin	1	Food	HMDB0038419	Glucotropaeolin	25.4	1	M-H2O-H	C14H19NO9S2	41.4	0.991305	82.7322		390.033	1	8.9609	0.570433	49669.9	47946.3	48160.6	47900.8	48264.9	57450.6	66700.7	69622.9	72275.1	63220	71785.8	40046.7	39414.6	35985.7	41952	37112.8	76657.3	58833.2	80080.7	73498.8	85672.5	46190.5	39688.3	32295.9	37166.4	47680.2		1.09062	0.275789	0.121825
9.43_202.1195m/z	L3	HMDB0028846	Glycyl-Lysine	1	Endogenous	HMDB0028951|HMDB0028846	Lysyl-Glycine|Glycyl-Lysine	26.1|52.8	2	M-H	C8H17N3O3	49.5	-1.10949	96.1068		202.119	1	9.43035	0.284867	5167.98	5060.12	5160.99	5339.73	5259.63	5149.85	3477.01	3468.54	3852.46	3615.65	3473.16	4968.69	5677.8	5867.07	5169.46	5854.33	5501.62	5351.66	4951.14	5444.99	5233.51	6890.32	6580.79	7344.04	7177.1	6643.6		1.48058	5.82e-07	2.08e-06
1.28_373.0456m/z	L3	HMDB0014544	Griseofulvin	1		HMDB0014544	Griseofulvin	46.6	1	M+Na-2H	C17H17ClO6	45.6	-1.16961	82.8352		373.046	1	1.2791	0.315433	216673	241859	235367	293192	312691	325094	4440.44	4500.61	32436.2	3229.96	2647.83	3343.67	3689.86	2740.43	3045.5	3783.85	3744.71	1148.66	2875.81	3499.49	3558.05	2441.41	2128.29	2714.78	2267.31	22067.8		-3.18715	0.19103	0.0900592
2.18_315.1203m/z	L3	HMDB0029428	Hypoglycin B	1	Endogenous|Food	HMDB0094679|HMDB0035028|HMDB0030555|HMDB0029428|HMDB0012996	Mono-(2-ethyl-5-hydroxyhexyl) phthalate|(x)-2-Heptanol glucoside|Tocopheronic acid|Hypoglycin B|Lipoyllysine	16.3|0|16.3|36.3|18.5	5	M+FA-H	C12H18N2O5	45.6	1.8466	93.9266		315.12	1	2.18117	0.529917	10378.8	10847.6	10384	10764.5	11050.6	9677.2	2267.4	2797.98	3703.95	2763	2574.1	11512.5	11843.5	22936	11823.3	13283.1	2080.64	7102.9	4491.7	5503.17	1955.2	10292.1	17213.1	24771.4	24657.5	9733.9		1.49815	0.318026	0.136335
2.19_169.9913m/z	L3	HMDB0004823	Lanthionine ketimine	1	Endogenous	HMDB0061116|HMDB0004823	2-aminophenol sulphate|Lanthionine ketimine	0|41.9	2	M-H2O-H	C6H7NO4S	45.6	-2.57669	89.2354		169.991	1	2.18993	0.1883	1680.57	1868.17	1848.38	1793.73	1870.88	1715.96	1377.01	1332.58	1484.11	1412.42	1398.83	2574.2	2878.9	2191.35	2638.38	2585.35	1481.16	811.158	822.983	976.219	1426.26	2779.65	1667.75	2067.43	1870.6	2637.44		-1.26952	0.0727546	0.0400662
3.36_262.0959n	L3	HMDB0031360	L-cis-Cyclo(aspartylphenylalanyl)	1	Endogenous|Food	HMDB0031360	L-cis-Cyclo(aspartylphenylalanyl)	27	1	M-H, M+Na-2H, 2M-H	C13H14N2O4	42.7	1.97594	88.9447	262.096	261.089	1	3.35527	0.3941	140312	146954	143328	145508	147222	138135	266089	258855	243969	248327	258835	226804	227830	86874	257395	232937	136131	29696.3	101637	62926.6	117275	102045	19741.7	23248.4	31187.2	189338		-2.85051	0.00280248	0.00250345
4.63_442.1739m/z	L3	HMDB0001938	Lisinopril	1		HMDB0001938	Lisinopril	28.9	1	M+K-2H	C21H31N3O5	42.4	-2.58165	86.3004		442.174	1	4.62597	0.192667	9930.27	10842.1	10305.7	10363.3	10095.6	8880.62	2535.48	2230.06	2278.04	3023.59	1802.81	7992.98	11236.4	12202	6648.03	7760.28	10357.7	10591	8645.83	9847.42	9949.88	20840.8	18458.8	21292.8	18783.2	15603.5		4.16107	2.73e-07	1.16e-06
3.81_94.9809m/z	L3	HMDB0240280	Mesylate	1		HMDB0240280|HMDB0031436	Mesylate|Silicic acid	34.8|4.11	2	M-H	CH4O3S	45.6	0.141117	93.2924		94.9809	1	3.81087	0.254233	1536.95	1634.83	1645.92	1603.98	1613.89	1491.62	1795.25	1677.07	1734.47	1574.75	1858.61	1531.77	1551.19	1498.33	1788.86	2208.05	1108.57	2036.79	1108.93	1084.92	980.33	1031.22	1615.5	1889.89	1924.95	1254.31		-1.36721	0.0311748	0.0195409
7.45_164.0382m/z	L3	HMDB0002005	Methionine sulfoxide	1	Endogenous|Food	HMDB0037057|HMDB0002005	Ethiin|Methionine sulfoxide	28.3|46.7	2	M-H	C5H11NO3S	46.6	-3.03772	90.0442		164.038	1	7.44982	0.468767	153911	158337	155242	150574	151622	142593	166980	184250	180942	183574	183822	226592	242635	179019	233583	240517	144092	48874.7	120327	106704	137776	163718	56143.8	70353.3	77590.8	202147		-1.61278	0.025448	0.0163605
7.82_519.0747m/z	L3	HMDB0039180	Methyl 4,6-di-O-galloyl-beta-D-glucopyranoside	1	Food	HMDB0039180|HMDB0038856|HMDB0030832|HMDB0002895	Methyl 4,6-di-O-galloyl-beta-D-glucopyranoside|4',4''',5,5'',7,7''-Hexahydroxy-3,8''-biflavone|Amentoflavone|Sennidin B	48.5|0|0|0	4	M+Na-2H	C21H22O14	45.8	-1.86002	82.8394		519.075	1	7.82212	0.157633	6250.24	4837.42	4860.54	4881.35	4929.28	7496.54	9463.88	10462.7	12161.9	9240.4	8617.49	5492.85	5205.57	3896.52	4676.92	3944.69	8499.55	4766.31	11256.6	6231.43	9678.14	4061.72	1961.42	1725.4	1735.4	5345.06		-1.23532	0.17125	0.0821245
9.03_348.1053m/z	L3	HMDB0037846	N-(1-Deoxy-1-fructosyl)phenylalanine	1	Food	HMDB0037846|HMDB0031787	N-(1-Deoxy-1-fructosyl)phenylalanine|Fenamiphos	40.3|0.077	2	M+Na-2H	C15H21NO7	45.8	-3.50044	92.6556		348.105	1	9.02663	0.276317	7318.76	8057.73	8508.82	8872.04	9185.11	7818.11	4800.14	4683.58	5295.82	5501.63	4563.8	9015.55	10778.4	11056.8	9645.78	12741.8	6943.22	5845.83	5451.33	6711.8	6177.67	11636.8	10377	12572.2	11796.6	10795.7		1.25296	0.0044189	0.00369698
3.97_359.0867m/z	L3	HMDB0033105	N2-Galacturonyl-L-lysine	1	Food	HMDB0033106|HMDB0033105|HMDB0030416	N6-Galacturonyl-L-lysine|N2-Galacturonyl-L-lysine|Avenic acid A	25.5|56.1|20.9	3	M+K-2H	C12H22N2O8	50.2	1.40711	96.7965		359.087	1	3.96868	0.219367	11780.1	11999.9	11635.6	11687.2	11800	11443.8	9039.94	8929.42	9291.27	9526.73	8460.79	13251.4	14967	15275	13628.9	14286.6	9862.8	9589.2	9499.67	9926.51	9172.21	14441.9	12780.9	13713.6	13497.2	13116.1		1.06193	0.0392066	0.0236094
4.81_198.0746m/z	L3	HMDB0035360	N-Methyl-1-deoxynojirimycin	1	Food	HMDB0035360	N-Methyl-1-deoxynojirimycin	23.2	1	M+Na-2H	C7H15NO4	42.8	-1.26473	92.0917		198.075	1	4.80552	0.29355	6738.6	6233.55	6028.4	5386.84	5487.13	7022.64	5578.06	6356.8	6676.88	6194.08	6295.67	6110.48	6061.61	5972.8	6268.61	5576.2	6731.18	5565.47	6913.16	6838.2	7149.52	6186.39	5507.51	4990.9	5565.26	5441.44		1.06739	0.269665	0.119911
1.43_646.4595n	L3	HMDB0114855	PA(16:1/16:0)	1	Endogenous|Food	HMDB0114921|HMDB0114896|HMDB0114874|HMDB0114855|HMDB0031131	PA(18:1(9Z)/14:0)|PA(18:1(11Z)/14:0)|PA(18:0/14:1(9Z))|PA(16:1(9Z)/16:0)|Glycerol 1-(9Z-octadecenoate) 2-tetradecanoate 3-phosphate	9.75|9.75|6.19|80.7|9.75	5	M-H, M+FA-H	C35H67O8P	54	3.2811	93.0377	646.459	645.452	1	1.43237	0.389733	65124.1	60919	59278.9	55740	52263.2	52427.3	68674.4	84808.1	78870.6	83152	89892.3	63003	72622.1	84908.6	72364	76326	24456.1	26455	27311.8	23766.1	31408.1	42829.5	102359	118072	133893	90663.3		-3.03903	1.74e-07	8.58e-07
8.91_332.0322m/z	L3	HMDB0038583	Piperolactam D	1	Food	HMDB0038583	Piperolactam D	38.1	1	M+K-2H	C17H13NO4	44.9	-2.79478	89.5342		332.032	1	8.91273	0.223633	17661.9	16665.5	16062.8	13415.7	14211	17248.1	24881.8	29503.9	28389.1	25297.7	29573.7	17227.3	17118.8	16642.5	18218.4	15179.8	9892.63	8309.09	10681.1	13319.2	11392.5	9601.46	9231.61	9711.03	8591.92	9091.49		-2.56829	4.12e-06	9.74e-06
5.06_853.4866m/z	L3	HMDB0014388	Ranolazine	1		HMDB0014388	Ranolazine	55.6	1	2M-H	C24H33N3O4	47.7	-0.403694	83.347		853.487	1	5.06403	0.267267	40292.3	45193.9	44595.4	45162.4	43275.2	37821.7	17116.3	18388.7	17980.4	19509.7	18725.8	55990.6	70378.2	69698.9	58163.3	75772	33464.5	27417.7	26201.2	31728.8	27905.3	62351.2	54490.1	64205.5	61039.4	56692.3		1.59961	1.73e-05	3.16e-05
2.30_221.0368n	L3	HMDB0002135	S-(3-oxo-3-carboxy-n-propyl)cysteine	1	Endogenous	HMDB0002135	S-(3-oxo-3-carboxy-n-propyl)cysteine	23.7	1	M-H2O-H, M-H	C7H11NO5S	34.8	4.617	55.6756	221.037	220.03	1	2.29503	0.38535	102943	106145	106882	105697	104920	99943.2	141356	145967	120038	143855	132397	100117	101435	115540	100766	103789	103816	146051	110818	90691	113806	66471.3	104181	90667.4	92020.7	70799.6		-1.20955	0.0478275	0.0278377
5.83_199.9997m/z	L3	HMDB0029415	S-Carboxymethyl-L-cysteine	1	Endogenous|Food	HMDB0029415	S-Carboxymethyl-L-cysteine	28	1	M+Na-2H	C5H9NO4S	40.8	-1.27092	77.7983		200	1	5.83103	0.144583	2176.06	2030.37	2079.43	1940.82	1843.73	1986.77	798.995	787.849	840.206	845.454	776.843	960.27	1243.97	7986.84	675.333	596.396	1159.14	3800.45	1798.5	1960.65	1304.24	1828.85	2858.29	2592.6	2911.27	1193.66		2.47521	0.00452528	0.00377024
4.14_386.0624n	L3	HMDB0034582	Shoyuflavone A	1	Food	HMDB0034582	Shoyuflavone A	21	1	M-H, M+Na-2H	C19H14O9	41.1	-3.5404	88.8794	386.062	407.037	1	4.14427	0.205917	19917.1	18355.8	18037.3	17733.9	18114.8	21496.2	23369.1	24717.7	25850.2	24582.6	23862.7	18095	16376.3	17731.5	18252.6	15414.7	21617.7	23347	25644.4	23126.1	24307.3	16357.8	17358.1	13874	15554.1	16667.3		-1.03677	0.294318	0.128281
9.43_678.0973m/z	L3	HMDB0011720	UDP-N-acetylmuraminate	1	Endogenous	HMDB0011720	UDP-N-acetylmuraminate	71.6	1	M-H	C20H31N3O19P2	52.8	2.739	95.3903		678.097	1	9.43473	0.421383	944694	997518	1.0074e+06	1.03133e+06	1.03372e+06	892652	1.8115e+06	1.77932e+06	1.69514e+06	1.83862e+06	1.67708e+06	1.05362e+06	950989	963697	1.02351e+06	924690	966479	1.26426e+06	982614	911211	1.00812e+06	712325	620849	645178	754828	812226		-1.71483	1.54e-05	2.88e-05
2.04_409.2367m/z	L3	HMDB0007853 | HMDB0007849	LysoPA(16:0)	2	Endogenous|Food	HMDB0092960|HMDB0092959|HMDB0092902|HMDB0092901|HMDB0062744|HMDB0034064|HMDB0030366|HMDB0015579|HMDB0007853|HMDB0007849	DG(10:0/0:0/8:0)|DG(10:0/8:0/0:0)|DG(8:0/0:0/10:0)|DG(8:0/10:0/0:0)|7alpha-hydroxy-3-oxochol-4-en-24-oic Acid|2-Angeloyl-9-(3-methyl-2E-pentenoyl)-2b,9a-dihydroxy-4Z,10(14)-oplopadien-3-one|Cavipetin C|Quinestrol|LysoPA(16:0/0:0)|LysoPA(0:0/16:0)	0|0|0|0|0|0|0|0|26.1|26.1	10	M-H	C19H39O7P	43.7	1.50469	94.3373		409.237	1	2.03667	0.3766	23354.5	23977.8	22860.1	23240	22870.6	23397.1	34489.1	33776.8	33044.9	39454.7	28774.7	54126.1	47139.5	33868.9	50935	49040.9	9032.06	0	7908.91	9815.86	9705.22	25743.3	275.083	3225.91	4251.13	26723.5		-4.64977	0.133843	0.0670246
1.52_409.2366m/z	L3	HMDB0007853 | HMDB0007849	LysoPA(16:0)	2	Endogenous|Food	HMDB0092960|HMDB0092959|HMDB0092902|HMDB0092901|HMDB0062744|HMDB0034064|HMDB0030366|HMDB0015579|HMDB0007853|HMDB0007849	DG(10:0/0:0/8:0)|DG(10:0/8:0/0:0)|DG(8:0/0:0/10:0)|DG(8:0/10:0/0:0)|7alpha-hydroxy-3-oxochol-4-en-24-oic Acid|2-Angeloyl-9-(3-methyl-2E-pentenoyl)-2b,9a-dihydroxy-4Z,10(14)-oplopadien-3-one|Cavipetin C|Quinestrol|LysoPA(16:0/0:0)|LysoPA(0:0/16:0)	0|0|0|0|0|0|0|0|23.5|23.5	10	M-H	C19H39O7P	43.2	1.40356	94.1485		409.237	1	1.51557	0.170783	12432.6	12398.4	11919.5	11974.6	12316.7	11401.8	18145.9	17082	15414.7	18132.5	14073.4	23264	20335.9	17747	20640.6	20627.7	3781.59	123.487	4295.87	5102.41	5226.24	11882.4	340.181	1898.75	2390.38	13311		-4.47114	0.0245119	0.0158297
2.03_483.2737m/z	L3	HMDB0007854 | HMDB0007850	LysoPA(18:0)	2	Endogenous|Food	HMDB0035973|HMDB0007854|HMDB0007850	Lucidenic acid M|LysoPA(18:0/0:0)|LysoPA(0:0/18:0)	3.24|31.4|31.4	3	M+FA-H	C21H43O7P	44.9	1.94107	95.5633		483.274	1	2.03228	0.345933	40283.4	40952.3	39255.7	40108.2	40393	42285	50412.9	47769.3	49352.6	45619.9	51181.9	94309.2	42870	31682.8	64939.5	45329.9	46619.7	3653.93	46919.2	54117.4	50217.3	56173.5	3285.51	15851.9	19353.1	50553.2		-1.21242	0.357473	0.149038
2.07_481.2579m/z	L3	HMDB0007855 | HMDB0007851	LysoPA(18:1)	2	Endogenous|Food	HMDB0039225|HMDB0038352|HMDB0032521|HMDB0030909|HMDB0011133|HMDB0007855|HMDB0007851	2-Stearyl citrate|Lucidenic acid N|Stearyl citrate|2,3-Secoporrigenin|DHAP(18:0)|LysoPA(18:1(9Z)/0:0)|LysoPA(0:0/18:1(9Z))	0.0489|1.47|0.0489|0.184|9.17|30.7|30.7	7	M+FA-H	C21H41O7P	44.8	1.72285	95.3522		481.258	1	2.06732	0.38535	38680.5	40618.2	39196.7	40223.7	39558.8	40552	38251.6	38582.4	38067.6	32225.6	35359.5	48958.1	40673.6	3178.98	41926.7	31021.9	64249.1	418.234	58036.7	50805.5	75451.6	113027	1120.13	31082.8	41569.4	89040.9		1.36427	0.648279	0.237091
1.52_436.2596n	L3	HMDB0007855 | HMDB0007851	LysoPA(18:1)	2	Endogenous|Food	HMDB0011133|HMDB0007855|HMDB0007851	DHAP(18:0)|LysoPA(18:1(9Z)/0:0)|LysoPA(0:0/18:1(9Z))	18.1|49.2|49.2	3	M-H, M+FA-H	C21H41O7P	47.8	1.40002	91.6718	436.26	481.258	1	1.51995	0.179533	41900.3	39810.5	38796	41209	40336.3	40390.6	52549.2	50024.2	46037.8	43737.3	44558.7	45954	40873.3	11927.5	39423.9	31181.8	48401.8	787.287	50517.3	47297.9	60018.3	82199.8	1778.15	29020.9	38512.1	70818.1		-1.14435	0.394733	0.161285
2.37_450.2633m/z	L3	HMDB0011504 | HMDB0011474	LysoPE(16:1)	2	Endogenous|Food	HMDB0035366|HMDB0011504|HMDB0011474	Cytochalasin Opho|LysoPE(16:1(9Z)/0:0)|LysoPE(0:0/16:1(9Z))	0|88.4|87.6	3	M-H	C21H42NO7P	56.3 | 56.2	1.53426	95.0252		450.263	1	2.36508	0.757633	492892	504536	490466	501227	495176	492780	506778	511390	498058	431220	450838	596385	582028	81600.9	524284	433625	830489	26141.3	798708	607184	963603	1.38783e+06	32774.5	226684	241955	1.10241e+06		1.34518	0.798565	0.277142
1.52_450.2633m/z	L3	HMDB0011504 | HMDB0011474	LysoPE(16:1)	2	Endogenous|Food	HMDB0035366|HMDB0011504|HMDB0011474	Cytochalasin Opho|LysoPE(16:1(9Z)/0:0)|LysoPE(0:0/16:1(9Z))	0|81|80.3	3	M-H	C21H42NO7P	54.9 | 54.7	1.42833	94.9448		450.263	1	1.51557	0.21895	165811	159322	154770	162272	162643	156200	163830	158199	138845	124118	126690	158672	156701	27475.3	136945	113272	241648	9497.7	263692	202727	283137	392996	12596.2	84585.3	87837.9	326538		1.40611	0.88536	0.29868
2.26_476.2791m/z	L3	HMDB0011507 | HMDB0011477	LysoPE(18:2)	2	Endogenous|Food	HMDB0011507|HMDB0011477	LysoPE(18:2(9Z,12Z)/0:0)|LysoPE(0:0/18:2(9Z,12Z))	78.8|78.8	2	M-H	C23H44NO7P	53.7	1.73111	92.0384		476.279	1	2.26437	0.398483	22653.4	22534.5	22719.7	22980.2	22635.3	22284	21997.8	22205.4	21751.4	18533.6	22263.6	20572.5	20951.7	12058.2	21883.8	16718.1	26315	8730.78	29702.3	35524.5	29876.9	39787.2	14110.1	30317.5	29046.1	32314.4		1.21918	0.704099	0.251678
2.22_479.3018n	L3	HMDB0011506 | HMDB0011505 | HMDB0011476 | HMDB0011475	LysoPE(18:1)	4	Endogenous|Food	HMDB0011506|HMDB0011505|HMDB0011476|HMDB0011475	LysoPE(18:1(9Z)/0:0)|LysoPE(18:1(11Z)/0:0)|LysoPE(0:0/18:1(9Z))|LysoPE(0:0/18:1(11Z))	50.1|50.1|49.8|49.8	4	M-H, 2M-H	C23H46NO7P	48.9 | 48.9 | 48.8 | 48.8	1.20263	95.8661	479.302	478.294	1	2.22497	0.709383	6.2617e+06	6.34121e+06	6.21723e+06	6.3425e+06	6.25107e+06	6.25714e+06	6.11623e+06	6.1037e+06	5.88602e+06	5.41054e+06	5.86716e+06	5.37194e+06	5.38058e+06	4.48192e+06	5.00001e+06	4.08326e+06	1.03303e+07	1.19516e+06	1.23504e+07	1.54694e+07	1.1432e+07	1.04686e+07	1.10811e+06	5.36247e+06	5.70609e+06	8.8983e+06		1.72808	0.581464	0.219349
1.52_479.3018n	L3	HMDB0011506 | HMDB0011505 | HMDB0011476 | HMDB0011475	LysoPE(18:1)	4	Endogenous|Food	HMDB0011506|HMDB0011505|HMDB0011476|HMDB0011475	LysoPE(18:1(9Z)/0:0)|LysoPE(18:1(11Z)/0:0)|LysoPE(0:0/18:1(9Z))|LysoPE(0:0/18:1(11Z))	85.5|85.5|85|85	4	M-H, 2M-H	C23H46NO7P	56 | 56 | 55.9 | 55.9	1.22956	95.9279	479.302	478.295	1	1.51995	0.262733	2.03611e+06	1.96182e+06	1.93266e+06	1.99971e+06	2.02037e+06	1.92583e+06	1.91013e+06	1.82361e+06	1.61384e+06	1.49577e+06	1.5893e+06	1.37905e+06	1.40323e+06	1.34982e+06	1.23314e+06	1.01211e+06	2.99809e+06	429952	4.04739e+06	5.14487e+06	3.3945e+06	2.90819e+06	409076	1.95395e+06	2.06508e+06	2.59164e+06		1.89914	0.416667	0.168326
6.47_185.0217m/z	L3	HMDB0059705 | HMDB0031639	(2-Methoxyethoxy)propanoic acid | Glycerol 1-propanoate	2	Endogenous|Food	HMDB0141768|HMDB0141767|HMDB0134031|HMDB0134030|HMDB0134029|HMDB0134028|HMDB0129375|HMDB0128076|HMDB0126545|HMDB0125104|HMDB0062774|HMDB0062655|HMDB0062605|HMDB0059705|HMDB0059629|HMDB0041592|HMDB0031639|HMDB0030677|HMDB0012225|HMDB0012140|HMDB0002641|HMDB0002035|HMDB0001713|HMDB0000227|HMDB0000205	3-(4-hydroxyphenyl)oxirane-2-carbaldehyde|(2E)-3-(3,4-dihydroxyphenyl)prop-2-enal|3-(2-hydroxyphenyl)oxirane-2-carbaldehyde|3-(2,5-dihydroxyphenyl)prop-2-enal|3-(2,3-dihydroxyphenyl)prop-2-enal|3-(2-hydroxyphenyl)prop-2-enoic acid|4-methoxy-1-benzofuran-6-ol|3-(4-hydroxyphenyl)prop-2-enoic acid|3-phenyloxirane-2-carboxylic acid|3-(3-hydroxyphenyl)prop-2-enoic acid|Trans-3-coumarate|Cis-2-coumarat…	0|36.8|0|38.6|36.8|0.314|21|0.314|0|0.314|0.314|0.314|21|59.7|29.6|0.314|66.8|0.314|0.314|19.7|0.314|0.314|0.314|29.6|0	25	M+K-2H	C6H12O4	50.6 | 52.1	-3.45097285116147 | -3.45097285096952	97.5987		185.022	1	6.4715	0.3863	197434	204614	206186	204721	204771	188936	144666	139119	129397	118527	148173	62052.5	59338.1	60897.4	64579.9	50920.3	95611.5	541224	51641.6	57971.4	75451.1	78486.2	340403	668874	705738	66501.8		1.20889	0.543285	0.208151
7.59_170.1050n	L3	HMDB0033926 | HMDB0015333	(3xi,6xi)-Cyclo(alanylvalyl) | Levetiracetam	2	Food|Wastewater	HMDB0033926|HMDB0015333	(3xi,6xi)-Cyclo(alanylvalyl)|Levetiracetam	35.8|35.4	2	M-H2O-H, M-H	C8H14N2O2	44.8	-3.10699	92.0784	170.105	169.098	1	7.58995	0.1883	4138.08	3736.74	4182.51	3855.69	3718.23	3952.93	546.414	530.784	388.098	514.046	310.39	709.232	548.038	734.886	705.056	806.103	13314.3	9040.87	14383.8	12023.9	15585.9	5092.62	2879.06	2757.93	2713.92	5237		28.1032	1.33e-08	1.45e-07
4.18_358.0832m/z	L3	HMDB0033662 | HMDB0015510	(S)-5'-Deoxy-5'-(methylsulfinyl)adenosine | Flunitrazepam	2	Food	HMDB0033662|HMDB0015510	(S)-5'-Deoxy-5'-(methylsulfinyl)adenosine|Flunitrazepam	26.1|12	2	M+FA-H	C11H15N5O4S | C16H12FN3O3	42.7 | 39.5	1.65359028363107 | -4.07804911503509	89.3396983961132 | 90.0887461325124		358.083	1	4.1837	0.310933	11088.3	11402.9	10727	11303.4	10572.8	10441.9	22763.1	22263.4	21674.1	22109.4	19943.2	9171.5	8534.43	5208.41	8157.32	8146.49	27186.4	3322.65	14554.3	13201.3	25667.1	9435.94	3009.07	2938.73	3858.83	12010.5		-1.29573	0.244352	0.110569
7.13_161.0683n	L3	HMDB0000510 | HMDB0062660	ALPHA-AMINOADIPATE | N-METHYLGLUTAMATE	2	Endogenous|Food	HMDB0094716|HMDB0062660|HMDB0062557|HMDB0061715|HMDB0033747|HMDB0029423|HMDB0000510|HMDB0000510|HMDB0062660	hydroxybutyrylglycine|N-methyl-L-glutamic Acid|N-Acetylthreonine|Glutamate, gamma-methyl ester|(Â±)-2,2'-Iminobispropanoic acid|Acetylhomoserine|Aminoadipic acid|ALPHA-AMINOADIPATE|N-METHYLGLUTAMATE	57|60|58.1|47.2|59.9|49|61.1|0|0	9	M-H2O-H, M-H, M+Na-2H	C6H11NO4	40.4	-3.32164	92.5575	161.068	160.061	1	7.12963	0.3113	26280.6	27600.9	27155.4	27447.9	27721.6	24014.3	90205.9	96517.5	94717	93996.6	101511	16486.7	17245.4	15537.2	17232.2	14154.8	8602.32	5171.82	8566.25	9147.27	8739.45	13507.8	6702.74	6729.48	7800.95	10414.7		-11.8564	1.3e-08	1.45e-07
1.40_136.0397m/z	L3	HMDB0001123 | HMDB0015687	ANTHRANILATE | SALICYLAMIDE	2	Food	HMDB0060722|HMDB0029806|HMDB0015687|HMDB0001891|HMDB0001538|HMDB0001392|HMDB0001123|HMDB0000875|HMDB0001123|HMDB0015687	2-Pyridylacetic acid|Methyl nicotinate|Salicylamide|m-Aminobenzoic acid|3-Pyridylacetic acid|p-Aminobenzoic acid|2-Aminobenzoic acid|Trigonelline|ANTHRANILATE|SALICYLAMIDE	0|0|0|0|0|0|0|0|0|0	10	M-H	C7H7NO2	39.3	-4.90828	93.2377		136.04	1	1.39733	0.140133	543.774	529.573	545.493	549.682	560.857	525.037	430.492	410.751	610.499	480.758	550.562	725.751	702.394	249.903	1072.68	1231.35	236.31	414.979	219.333	181.078	228.785	326.839	504.127	693.654	617.84	444.345		-1.93916	0.00229402	0.0021017
9.41_259.0227m/z	L3	HMDB0001586 | HMDB0000645	GLUCOSE 1-PHOSPHATE | GALACTOSE 1-PHOSPHATE	2	Endogenous|Food	HMDB0131286|HMDB0128680|HMDB0128679|HMDB0125202|HMDB0060467|HMDB0060393|HMDB0059654|HMDB0039494|HMDB0010325|HMDB0006873|HMDB0006814|HMDB0006800|HMDB0006797|HMDB0006330|HMDB0006328|HMDB0003971|HMDB0003498|HMDB0002985|HMDB0001586|HMDB0001401|HMDB0001351|HMDB0001313|HMDB0001213|HMDB0001078|HMDB0001076|HMDB0001031|HMDB0000994|HMDB0000645|HMDB0000213|HMDB0000124|HMDB0001586|HMDB0000645|HMDB0000124	6-ethoxy-3,4,5-trihydroxyoxane-2-carboxylic acid|3-(7-hydroxy-6-methoxy-2H-1,3-benzodioxol-5-yl)prop-2-enoic acid|3-(6-hydroxy-7-methoxy-2H-1,3-benzodioxol-5-yl)prop-2-enoic acid|(3,4,5,6-tetrahydroxyoxan-2-yl)methyl acetate|D-fructose 1-phosphate|5-Deoxyribose-1-phosphate|Deoxyribose 5-monophosphate|Benzoylmalic acid|Ethyl glucuronide|D-Tagatose 6-phosphate|1D-myo-Inositol 3-phosphate|Beta-D-Fru…	32.8|0|0|33.3|34.3|31.2|32.4|15.2|32.8|35.6|33.5|35.6|34.3|35.6|34.3|35.6|33.5|33.5|35.6|33.5|33|33.5|26.8|33.5|35.6|32.4|35.6|35.6|33.5|32.2|0|0|63.1	33	M-H	C6H13O9P	44.5	1.0117	95.833		259.023	1	9.40847	0.324283	7960.33	8300.09	8498.18	8592.06	8529.94	8063.42	16139.6	10284.2	10310.8	15555.7	16715.2	4040.45	4217.51	4738.24	4989.85	4948.61	2152.3	2886.87	2087.4	2180.08	1984.88	5753.28	14623.3	17308.9	17285.6	11964.7		-6.11126	6.69e-07	2.3e-06
1.45_129.0550m/z	L3	HMDB0006024 | HMDB0000491	MEVALOLACTONE | 3-METHYL-2-OXOVALERATE	2	Endogenous|Food	HMDB0059876|HMDB0006024|HMDB0000491|HMDB0059705|HMDB0059629|HMDB0031639|HMDB0012140|HMDB0000227	PANTOLACTONE|MEVALOLACTONE|3-METHYL-2-OXOVALERATE|(2-Methoxyethoxy)propanoic acid|(R)-mevalonate|Glycerol 1-propanoate|(R) 2,3-Dihydroxy-3-methylvalerate|Mevalonic acid	0|0|0|0|0|0|0|0	8	M-H	C6H10O3	38.6	-5.19594	93.2362		129.055	1	1.44988	0.19705	1429.34	1369.6	1337.4	1411.25	1491.46	1710.48	1492.6	1440.25	1616.8	1596.7	1323.3	1237.29	1169.39	1263.22	1129.29	1182.3	1452.32	1588.62	1580.01	1366.42	1464.71	1242.6	1523.38	1322.8	1521.42	1291.91		-1.00236	0.978109	0.320372
7.42_387.1151m/z	L3	HMDB0000258 | HMDB0256083	SUCROSE | PALATINOSE	2	Food	HMDB0000258|HMDB0256083|HMDB0133305|HMDB0125600|HMDB0060068|HMDB0041627|HMDB0039876|HMDB0039727|HMDB0039237|HMDB0038489|HMDB0037138|HMDB0033368|HMDB0029933|HMDB0029919|HMDB0029898|HMDB0029882|HMDB0029880|HMDB0011742|HMDB0011740|HMDB0006792|HMDB0006603|HMDB0005826|HMDB0002923|HMDB0000975|HMDB0000740|HMDB0000258|HMDB0000186|HMDB0000163|HMDB0000055|HMDB0000048	SUCROSE|PALATINOSE|6-({[3,4,5-trihydroxy-6-(hydroxymethyl)oxan-2-yloxy}methyl)oxane-2,3,4,5-tetrol|2-{[3,4-dihydroxy-2,5-bis(hydroxymethyl)oxolan-2-yloxy}-6-(hydroxymethyl)oxane-3,4,5-triol|Glucose-1,3-mannose oligosaccharide|beta-Lactose|Fagopyritol A1|Trehalulose|Glucinol|Allolactose|Maltodextrin|DEAE-cellulose|Mannobiose|Maltulose|Inulobiose|Sakebiose|Neotrehalose|Kojibiose|Turanose|Epimelibio…	0|0|44.6|43.9|44.6|44.6|43.9|43.9|43.6|44.6|44.6|44.6|44.6|44|43.9|44.6|43.9|43.9|43.9|44.6|42.9|43.9|44.6|43.9|43.9|43.9|44.6|44.6|44.6|44.6	30	M+FA-H	C12H22O11	40.2	1.92843	95.8704		387.115	1	7.42355	0.1928	10117.7	10053	10229.1	11329.9	11490.4	14439.5	13837.9	6424.16	9951.58	6836.25	9262.41	6912.01	6072.98	7953.36	6035.94	7700.95	6284.29	12622.1	7591.58	8621.11	9062.87	6148.32	16558.2	8513.75	18190.4	6362.65		-1.04822	0.851201	0.290831
8.05_170.9906m/z	L3	HMDB0000956 | HMDB0029878	Tartaric Acid | TARTRATE	2	Endogenous|Food	HMDB0000956|HMDB0029878|HMDB0062642|HMDB0059916|HMDB0029878	Tartaric Acid|TARTRATE|3-carboxy-2,3-dihydroxypropanoate|2,3-Dihydroxybutanedioic acid|D-Tartaric acid	0|0|0|0|0	5	M+Na-2H	C4H6O6	44.8	-3.40042	94.5349		170.991	1	8.0542	0.0175167	354.268	319.212	358.817	351.947	310.927	422.428	377.834	315.981	278.68	161.886	347.939	344.18	337.615	319.826	341.951	246.967	222.992	540.846	300.668	269.94	244.421	198.397	262.266	258.341	310.946	303.855		1.06513	0.827263	0.284833
3.16_243.0623m/z	L3	HMDB0000296 | HMDB0000767	URIDINE | Pseudouridine	2	Endogenous|Food	HMDB0000296|HMDB0000767|HMDB0030419|HMDB0028815|HMDB0028752|HMDB0015188|HMDB0011164|HMDB0000767|HMDB0000296	URIDINE|Pseudouridine|gamma-Glutamylaspartic acid|Glutamylaspartic acid|Aspartyl-Glutamate|Mimosine|L-beta-aspartyl-L-glutamic acid|Pseudouridine|Uridine	0|0|62.7|49.3|51.1|35.7|59.3|57.1|65.5	9	M-H	C9H12N2O6	42.9	0.192669	89.0193		243.062	1	3.16258	0.372217	196856	197652	196693	195173	199423	196749	164252	165219	169363	168805	163310	174185	179952	189037	174875	176792	207246	430794	222980	236174	209070	184496	229129	210822	210531	177106		1.57202	0.0178691	0.0121753
1.22_91.0221m/z	L3	HMDB0032425 | HMDB0030299	2-(Methylthio)ethanol | Cibulins	2	Endogenous|Food	HMDB0032425|HMDB0030299	2-(Methylthio)ethanol|Cibulins	41.1|40.4	2	M-H	C3H8OS	46.5 | 46.3	-2.66811	94.4667		91.0221	1	1.2178	0.236633	2251.69	2559.43	2516.89	2993.71	3157.34	3180.89	31.7085	38.9102	751.222	14.5449	5.92083	48.968	40.0828	37.3044	22.5946	44.4301	51.8139	10.3858	52.9224	68.1012	27.108	9.31278	24.9683	36.6008	19.7139	390.594		-4.00466	0.925977	0.308643
9.60_564.1796m/z	L3	HMDB0126539 | HMDB0126538	2-amino-4-({1-[(carboxymethyl)-C-hydroxycarbonimidoyl]-2-[(1,3-dihydroxy-2-pentyl-1-phenylpropan-2-yl)sulfanyl]ethyl}-C-hydroxycarbonimidoyl)butanoic acid | 2-amino-4-({1-[(carboxymethyl)-C-hydroxycarbonimidoyl]-2-[(2,3-dihydroxy-2-pentyl-1-phenylpropyl)sulfanyl]ethyl}-C-hydroxycarbonimidoyl)butanoic acid	2	Endogenous	HMDB0126539|HMDB0126538|HMDB0034229	2-amino-4-({1-[(carboxymethyl)-C-hydroxycarbonimidoyl]-2-[(1,3-dihydroxy-2-pentyl-1-phenylpropan-2-yl)sulfanyl]ethyl}-C-hydroxycarbonimidoyl)butanoic acid|2-amino-4-({1-[(carboxymethyl)-C-hydroxycarbonimidoyl]-2-[(2,3-dihydroxy-2-pentyl-1-phenylpropyl)sulfanyl]ethyl}-C-hydroxycarbonimidoyl)butanoic acid|Hygromycin B	45.9|45.9|23.7	3	M+K-2H	C24H37N3O8S	45.8	1.63562	84.8684		564.18	1	9.60155	0.346717	27412.5	27260.7	26807.4	25608.3	25995.8	24140.8	293.789	27.8861	443.248	414.786	530.466	6185.46	5924.05	1164.3	7106.15	3349.62	25.9181	0	72.3959	161.038	0	132213	111638	84043.4	91073.1	77307.7		-6.59403	0.0434593	0.0257134
1.96_236.0534n	L3	HMDB0142000 | HMDB0124934	3,4,5-trihydroxy-6-(2-oxoethoxy)oxane-2-carboxylic acid | 6-(acetyloxy)-3,4,5-trihydroxyoxane-2-carboxylic acid	2	Endogenous	HMDB0142000|HMDB0124934	3,4,5-trihydroxy-6-(2-oxoethoxy)oxane-2-carboxylic acid|6-(acetyloxy)-3,4,5-trihydroxyoxane-2-carboxylic acid	22.1|22.1	2	M+Na-2H, M+K-2H	C8H12O8	43.5	0.933149	96.7857	236.053	257.028	1	1.95785	0.17515	26241.3	22528.8	21846.3	22638.3	23827.9	36660.3	32097.7	36353.1	46986.5	38753.8	25490.4	23600.1	21030.1	18303.4	20095.9	19821.8	21970.8	35941.9	25359.5	21017.1	21713.4	25033.3	28277.3	19497	19306.1	17032.6		-1.42601	0.0367414	0.0223144
1.29_138.0190m/z	L3	HMDB0013188 | HMDB0002658	3-Hydroxypicolinic acid | 6-Hydroxynicotinic acid	2	Endogenous	HMDB0062627|HMDB0059710|HMDB0013188|HMDB0002658|HMDB0001241|HMDB0001232	4-nitrophenolate|2-Hydroxynicotinic acid|3-Hydroxypicolinic acid|6-Hydroxynicotinic acid|2-Aminomuconic acid|4-Nitrophenol	0|0|35|35|0|0	6	M-H	C6H5NO3	45.2	-4.53488	96.0283		138.019	1	1.29223	0.162017	2580.97	2571.6	2546.4	2716.01	2676.7	2772.26	3245.66	2750.89	2630.07	2835.91	2863.18	2492.18	2367.13	2067.56	2417.12	2241.16	2373.64	2458.63	2581.5	2777.56	2934.74	2242.17	2039.9	1934.14	2343.92	2308.58		-1.09139	0.131563	0.0660636
8.95_363.0354m/z	L3	HMDB0062755 | HMDB0001554	5'-xanthylate(2-) | Xanthylic acid	2	Endogenous|Food	HMDB0140531|HMDB0138047|HMDB0137812|HMDB0137133|HMDB0131930|HMDB0131927|HMDB0131755|HMDB0129371|HMDB0128647|HMDB0128646|HMDB0128644|HMDB0128643|HMDB0128641|HMDB0128640|HMDB0128207|HMDB0126562|HMDB0126561|HMDB0126560|HMDB0125214|HMDB0125075|HMDB0125061|HMDB0125046|HMDB0125031|HMDB0062755|HMDB0037357|HMDB0002755|HMDB0001554	2-(3,4-dihydroxyphenyl)-5,6,7,8-tetrahydroxy-4H-chromen-4-one|5,7,8-trihydroxy-2-(3,4,5-trihydroxyphenyl)-4H-chromen-4-one|5,7,8-trihydroxy-3-(2,4,5-trihydroxyphenyl)-4H-chromen-4-one|2-(2,4-dihydroxyphenyl)-2-oxoacetic acid|5,6,7-trihydroxy-2-(2,4,5-trihydroxyphenyl)-4H-chromen-4-one|5,6,7-trihydroxy-2-(2,3,4-trihydroxyphenyl)-4H-chromen-4-one|2-(2,4-dihydroxyphenyl)-3,5,6,7-tetrahydroxy-4H-chro…	0|0|0|0|0|0|0|0|42.7|42.7|42.7|42.7|42.7|42.7|0|0|0|0|0|0|0|0|0|60.9|0|0|60.9	27	M-H	C10H13N4O9P	50.4	1.89443671707542 | 1.89443671691928	93.4453		363.035	1	8.95215	0.324483	16513.3	17318.5	17055.9	17271.5	17395.6	15754.7	6694.84	4406.68	3939.31	6168.95	3703.48	7095.45	8172.81	18726.2	4623.67	4664.12	28252.2	48066.9	30087.5	30311.1	23866.4	16108.6	24790.3	30735.7	35388.7	19745.7		6.44573	3.72e-06	8.95e-06
5.47_232.0463m/z	L3	HMDB0060410 | HMDB0031700	6-Carboxy-5,6,7,8-tetrahydropterin | 1-(Malonylamino)cyclopropanecarboxylic acid	2	Endogenous|Food	HMDB0060410|HMDB0031700	6-Carboxy-5,6,7,8-tetrahydropterin|1-(Malonylamino)cyclopropanecarboxylic acid	26.8|35.2	2	M+Na-2H | M+FA-H	C7H9N5O3 | C7H9NO5	43.6 | 46.6	4.97689178205417 | -0.0951343038203999	97.0562004607865 | 98.0263424699758		232.046	1	5.47168	0.171183	7032.48	7396.32	7346.38	7346.57	7542.58	6605.27	12494.5	12196.6	10677.5	12422.8	10739.4	12228.8	13047.2	13637.1	12435.4	12891.5	2045.58	1113.98	6398.26	2123.65	2139.83	2590.57	2818.91	3262.81	3364.49	3787.2		-4.23483	0.00046322	0.000541114
9.22_677.2280m/z	L3	HMDB0041621 | HMDB0006607	6'-Sialyllactosamine | 3'-Sialyllactosamine	2	Endogenous|Food	HMDB0041621|HMDB0006607	6'-Sialyllactosamine|3'-Sialyllactosamine	20.2|20.2	2	M+FA-H	C23H40N2O18	41.7	3.51480723616562 | 3.51480723652526	92.431		677.228	1	9.21993	0.223783	22614.9	24684.8	25511	24834.1	24735.4	20320.5	10265.6	10459.8	9128.23	10635.9	17639.2	36731.9	35172.1	33406	33613.6	33443.2	955.68	30.5415	1268.74	844.439	1245.48	31864.3	20418.9	27193	23366.9	22188.4		-13.3787	0.00280017	0.00250345
6.46_327.0951m/z	L3	HMDB0004256 | HMDB0002721	7-Hydroxy-6-methyl-8-ribityl lumazine | 1-Methylinosine	2	Endogenous	HMDB0060832|HMDB0004256|HMDB0002721	meta-O-Dealkylated flecainide lactam|7-Hydroxy-6-methyl-8-ribityl lumazine|1-Methylinosine	6.84|22.4|21.6	3	M-H | M+FA-H	C12H16N4O7 | C11H14N4O5	42.9 | 43	1.35308849718493 | 1.57376036886824	93.6297247073869 | 95.1163352585058		327.095	1	6.45837	0.24575	4492.5	4526.29	4654.89	4662.32	4483.14	4217.78	1502.01	1288.67	1346.5	1461.82	905.235	1919.78	2266.84	7653.89	1606.41	1850.85	5204.43	6590.65	4088.07	7077.86	5401.96	7898.02	5997.94	4161.7	4007.78	5732.91		4.36069	3.96e-06	9.41e-06
8.91_363.0586n	L3	HMDB0011670 | HMDB0001397	8-Oxo-dGMP | Guanosine monophosphate	2	Endogenous	HMDB0059639|HMDB0011670|HMDB0001397	Cyclic pyranopterin monophosphate|8-Oxo-dGMP|Guanosine monophosphate	48.9|67|68.3	3	M-H, M+Na-2H	C10H14N5O8P	50.4 | 50.6	1.67934	86.888	363.059	362.051	1	8.90835	0.491367	220796	226394	227776	231998	232942	227366	295588	284673	263338	294848	200778	193242	200566	240790	155226	145202	287000	256325	281149	250658	269133	270610	265155	254117	245860	212445		1.00376	0.87684	0.296404
6.99_269.1372m/z	L3	HMDB0028725 | HMDB0028704	Asparaginyl-Arginine | Arginyl-Asparagine	2	Endogenous	HMDB0028725|HMDB0028704	Asparaginyl-Arginine|Arginyl-Asparagine	50.7|51.3	2	M-H2O-H	C10H20N6O4	48.5 | 48.6	1.44323342257438 | 1.44323342237711	93.6591		269.137	1	6.9937	0.202	4269.23	4205.99	4179.05	4171.45	4165.48	4083.68	3747.17	3717.64	3927.2	3905.54	3799.85	4919.95	5121.08	5019.48	5167.42	5011.61	3910.51	3844.86	3819.58	3902.54	3864.92	4161.24	3987.99	3911.54	3956.78	4207.19		1.01283	0.30455	0.131628
9.52_287.1477m/z	L3	HMDB0028725 | HMDB0028704	Asparaginyl-Arginine | Arginyl-Asparagine	2	Endogenous	HMDB0028725|HMDB0028704	Asparaginyl-Arginine|Arginyl-Asparagine	58.2|44.9	2	M-H	C10H20N6O4	50.1 | 47.4	1.45973373131623 | 1.45973373111897	93.9047		287.148	1	9.52232	0.175567	3610.77	3611.29	3693.76	3818.01	3769.71	3441.32	1835.96	1950.97	1945.02	2082.68	1328.25	1822.74	2069.96	1988.39	1574.68	1979.66	4860.75	5300.86	4424.15	5007.62	5260.28	6660.18	5890.98	6997.17	6617.56	6434.65		2.71836	2.53e-06	6.54e-06
7.31_270.1212m/z	L3	HMDB0028747 | HMDB0028705	Aspartyl-Arginine | Arginyl-Aspartic acid	2	Endogenous	HMDB0028747|HMDB0028705	Aspartyl-Arginine|Arginyl-Aspartic acid	45.3|45.3	2	M-H2O-H	C10H19N5O5	47.5	1.48613	94.1888		270.121	1	7.30517	0.180067	3400.92	3410.11	3490.53	3420.32	3408.35	3279.04	2343.79	2459.14	2691.53	2632.26	2522.52	3989.09	4428.3	4518.5	4189.97	4666.79	2676.99	2561.27	2565.62	2656.21	2453.83	3844.65	3741.02	4326.15	4001.17	3795.47		1.02092	0.481514	0.188594
7.76_245.0780m/z	L3	HMDB0028754 | HMDB0011160	Aspartyl-Hydroxyproline | L-alpha-Aspartyl-L-hydroxyproline	2	Endogenous	HMDB0028754|HMDB0011160|HMDB0000497	Aspartyl-Hydroxyproline|L-alpha-Aspartyl-L-hydroxyproline|5,6-Dihydrouridine	30.5|30.5|7.93	3	M-H	C9H14N2O6	44.9	0.359647	94.4824		245.078	1	7.75635	0.197133	2916.8	3253.63	3191.55	3001.54	3023.87	2321.37	1177.18	1167.97	907.685	1066.57	1401.99	2243.52	2365.12	2794.77	2386.56	2394.83	3739.81	5466.46	4028.08	4370.99	3646.29	4499.06	3949.49	4450.47	4493.81	4150.26		3.71441	1.24e-06	3.76e-06
4.93_288.1237m/z	L3	HMDB0041836 | HMDB0038582	Benzoyl ecgonine | 5-Amino-2,3-dihydro-6-(3-hydroxy-4-methoxy-1-oxobutyl)-2,2-dimethyl-4H-1-benzopyran-4-one	2	Endogenous|Food	HMDB0041955|HMDB0041836|HMDB0038582|HMDB0015636	Norcocaine|Benzoyl ecgonine|5-Amino-2,3-dihydro-6-(3-hydroxy-4-methoxy-1-oxobutyl)-2,2-dimethyl-4H-1-benzopyran-4-one|Agomelatine	0.601|56.9|56|0	4	M-H | M-H2O-H	C16H19NO4 | C16H21NO5	49.2 | 49	-1.41678519506771 | -1.3336920209173	90.7949481518733 | 90.5575749313082		288.124	1	4.92812	0.245383	5471.53	5450.66	5441.35	5069.13	4453.73	4784.72	4271.62	4755.23	4649.46	4741.07	5517.76	7635.53	8962.58	8724.61	8555.89	8880.86	3618.1	2357.55	3783.62	3807.76	3531.78	5037.16	4286.63	4634.88	5582.51	5743.98		-1.39981	0.00805619	0.00617321
2.51_510.2845m/z	L3	HMDB0035368 | HMDB0010380	Cytochalasin Ppho | LysoPC(14:1(9Z))	2	Endogenous|Food	HMDB0035368|HMDB0010380	Cytochalasin Ppho|LysoPC(14:1(9Z))	35.1|43.3	2	M-H | M+FA-H	C30H41NO6 | C22H44NO7P	43.9 | 47.5	-3.17800206141124 | 1.60000843745308	88.3232634418428 | 96.037496359195		510.284	1	2.50522	1.01645	532364	552330	538905	550843	544812	527644	1.06601e+06	1.12678e+06	1.36797e+06	1.11347e+06	1.47539e+06	1.01374e+06	956711	4123.88	1.55277e+06	1.06483e+06	110573	191.889	13705.3	6662.19	98270.6	132191	35.7889	1455.01	2441.47	326335		-26.8071	0.00377836	0.00322078
7.55_245.0432m/z	L3	HMDB0033942 | HMDB0029968	Dambonitol | Ethyl beta-D-glucopyranoside	2	Food	HMDB0142174|HMDB0142173|HMDB0142172|HMDB0142171|HMDB0142170|HMDB0142169|HMDB0142075|HMDB0141325|HMDB0140920|HMDB0128674|HMDB0128673|HMDB0128668|HMDB0128667|HMDB0128665|HMDB0128183|HMDB0127488|HMDB0041691|HMDB0034069|HMDB0033942|HMDB0032616|HMDB0030018|HMDB0029968	2-[(3-hydroxyphenyl)methyl]butanedioic acid|2-benzyl-3-hydroxybutanedioic acid|2-benzyl-2-hydroxybutanedioic acid|2-[(4-hydroxyphenyl)methyl]butanedioic acid|2-[hydroxy(phenyl)methyl]butanedioic acid|2-[(2-hydroxyphenyl)methyl]butanedioic acid|3-(2-hydroxy-3,4-dimethoxyphenyl)prop-2-enoic acid|3-(3-hydroxy-4,5-dimethoxyphenyl)prop-2-enoic acid|3-(3-hydroxy-2,4-dimethoxyphenyl)prop-2-enoic acid|6-…	0|0|0|0|0|0|0|0|0|0|0|0|0|28.4|30.2|0|30.2|0|69.2|0|0|70.9	22	M+K-2H	C8H16O6	53.2 | 53.6	-0.572367044686453 | -0.572367044823033	97.616		245.043	1	7.55053	0.275883	1.22948e+06	1.25082e+06	1.27586e+06	1.30174e+06	1.32374e+06	1.24041e+06	726807	686090	664033	642324	736612	398871	363596	1.26183e+06	399546	350980	557784	1.99273e+06	573649	916107	460022	487862	2.42882e+06	2.81106e+06	2.77581e+06	363529		1.30222	0.694498	0.249402
2.18_541.2799m/z	L3	HMDB0060819 | HMDB0041366	Digoxigenin monodigitoxoside | 24,25-Diacetylvulgaroside	2	Endogenous|Food	HMDB0060819|HMDB0041366|HMDB0036415|HMDB0035742	Digoxigenin monodigitoxoside|24,25-Diacetylvulgaroside|Anabsinthin|Absinthin	46.6|46.3|16.8|16.8	4	M+Na-2H	C29H44O8	45.2	3.09964	83.1736		541.28	1	2.1768	0.332817	57188	61915.3	59747.2	64031.9	60901.4	54894.7	85110.3	83969.5	102707	79597	108250	77244.1	67903.2	46303.3	110992	73659.7	30599	16524.5	45802.3	49085.3	44425.1	28940.7	15468	43070.4	54041.4	45052.1		-2.46537	0.00185363	0.00176771
9.34_134.0466m/z	L3	HMDB0004816 | HMDB0000034	FAPy-adenine | Adenine	2	Endogenous|Food	HMDB0004816|HMDB0000034	FAPy-adenine|Adenine	19.9|20.3	2	M-H2O-H | M-H	C5H7N5O | C5H5N5	42.1	-4.16281840340936 | -4.71799437142152	95.2418600657081 | 95.4819545606633		134.047	1	9.33815	0.504583	3695.83	3740.74	3886.51	4098.25	4256.27	4202.59	5849.68	5838.84	5784.14	6040.59	5016.27	2664.03	2553.34	2672.03	2617.39	2748.72	7627.5	5994.77	6411.71	7393.89	8208.63	3954.7	3344.79	3505.5	3545.42	3626.71		1.24911	0.0111043	0.0081163
4.82_218.0669m/z	L3	HMDB0060278 | HMDB0037848	Fructoseglycine | N-(1-Deoxy-1-fructosyl)glycine	2	Food	HMDB0060278|HMDB0038441|HMDB0037848|HMDB0013639|HMDB0006488	Fructoseglycine|1-Isothiocyanato-7-(methylsulfinyl)heptane|N-(1-Deoxy-1-fructosyl)glycine|8-[(Aminomethyl)sulfanyl]-6-sulfanyloctanoic acid|N-Acetyl-L-glutamate 5-semialdehyde	42.7|0|44.6|14.1|28.1	5	M-H2O-H	C8H15NO7	47.6 | 48	-0.398313671407645 | -0.398313671287766	95.9192		218.067	1	4.82303	0.170783	2718.37	3502.4	3700.14	4218.32	4373.61	2952.81	1691.89	1360.33	1493.98	1955.44	1649.13	3829.34	5426.54	4545.48	4495.57	6016.46	3446.23	2953.21	2135.67	2983.71	2973.84	7965.73	6385.42	8715.43	7760.62	8343.17		1.77807	0.000441274	0.00052033
8.53_318.0768m/z	L3	HMDB0039733 | HMDB0004662	gamma-Glutamylcysteinylserine | S-(Hydroxymethyl)glutathione	2	Endogenous|Food	HMDB0039733|HMDB0004662	gamma-Glutamylcysteinylserine|S-(Hydroxymethyl)glutathione	24.6|24.6	2	M-H2O-H	C11H19N3O7S	42.6	0.846592829823313 | 0.846592829991941	89.5529		318.077	1	8.5315	0.245217	7676.12	7891.85	7201.87	6748.97	6384.83	6042.02	387.97	588.328	400.512	519.664	835.994	1909.71	2404.33	8408.63	2131.08	2135.2	2794.03	7212.81	7800.88	9614.04	4807.11	10089.2	20179.4	20450.9	21285.4	6431.47		11.7948	1.43e-05	2.73e-05
6.74_275.0712m/z	L3	HMDB0038613 | HMDB0004818	gamma-L-Glutamyl-L-methionine sulfoxide | Biotin sulfone	2	Endogenous|Food	HMDB0038613|HMDB0031975|HMDB0029534|HMDB0029364|HMDB0015477|HMDB0004818	gamma-L-Glutamyl-L-methionine sulfoxide|3-Methoxy-2-(4-methylbenzoyl)-4H-1-benzopyran-4-one|Glyzarin|7-Acetoxy-2-methylisoflavone|Clenbuterol|Biotin sulfone	34.3|12.4|17.3|17.9|17.4|26.1	6	M-H2O-H | M-H	C10H18N2O6S | C10H16N2O5S	44.7 | 43.1	1.61757313186584 | 1.72308355421126	91.1591420871762 | 91.4009074073385		275.071	1	6.74343	0.24115	15363.7	16630.3	15914.5	15795.5	15897.4	13435	10478	11092.7	11397.7	11623.1	11175.9	22202.4	26110.7	21070.2	24030	26949.5	15317.8	5395.74	11952.1	12151.5	13953.2	23779.5	8088.22	11593.8	11852.9	24557		1.05385	0.977581	0.320304
5.75_221.0931m/z	L3	HMDB0028848 | HMDB0001046	Glycyl-Phenylalanine | Cotinine	2	Endogenous|Food	HMDB0142637|HMDB0028995|HMDB0028848|HMDB0001046|HMDB0000259	(2S)-2-hydrazinyl-3-(4-hydroxy-3-methoxyphenyl)-2-methylpropanoic acid|Phenylalanyl-Glycine|Glycyl-Phenylalanine|Cotinine|Serotonin	0|0|22.1|12|0	5	M-H | M+FA-H	C11H14N2O3 | C10H12N2O	43.6 | 41.9	-0.392374664361967 | -0.494876883459222	96.4329311215989 | 98.0079900896572		221.093	1	5.74783	0.2015	2313.95	2513.01	2425.86	2460.88	2429.77	2337.25	334.252	306.534	458.022	407.616	358.61	1470.86	1819.09	2082.62	1387.09	2090.35	2927.73	2669.47	2809.25	3156.79	2592.66	6868.93	5551.7	7266.28	6092.96	5534.14		7.59016	5.72e-09	7.74e-08
8.02_860.1890m/z	L3	HMDB0012969 | HMDB0011660	Heptanoyl-CoA | 2-Methylhexanoyl-CoA	2	Endogenous|Food	HMDB0012969|HMDB0011660	Heptanoyl-CoA|2-Methylhexanoyl-CoA	55.1|55.1	2	M-H2O-H	C28H48N7O17P3S	47	3.1533017955466 | 3.15330179567591	83.5608		860.189	1	8.02355	0.232083	50601.1	53581.4	54289.6	51382.5	51016.8	48651.6	24129.8	27074.2	24916.4	21696.2	34962.4	7164.89	7006.49	45696.5	7208.56	5899.99	12196	78402.9	30533.1	48949	13867.4	6855.58	75417.7	65493	59748.7	6590.52		1.38537	0.802882	0.278255
6.75_193.0728m/z	L3	HMDB0028885 | HMDB0028843	Histidinyl-Glycine | Glycyl-Histidine	2	Endogenous	HMDB0037295|HMDB0033750|HMDB0028885|HMDB0028843|HMDB0014962|HMDB0001847	3-[(2-Mercapto-1-methylpropyl)thio]-2-butanol|D-Glycero-D-galacto-heptitol|Histidinyl-Glycine|Glycyl-Histidine|Enprofylline|Caffeine	0|0|36.1|32.2|5.17|16.4	6	M-H2O-H	C8H12N4O3	46 | 45.2	-1.44971025591822 | -1.44971025605223	95.6243		193.073	1	6.75218	0.210217	2374.31	2421.83	2553.38	2716.37	2894.13	2804.02	1412.82	1351.61	1440.13	1550.49	1146.39	1985	2491.4	2946.47	2045.89	2242.78	2920.4	3800.02	2463.4	3078.19	2852.4	4345.97	4562.79	4307.65	3975.22	3583.86		2.19004	1.83e-05	3.32e-05
8.94_290.0998m/z	L3	HMDB0028858 | HMDB0028732	Hydroxyprolyl-Asparagine | Asparaginyl-Hydroxyproline	2	Endogenous	HMDB0028858|HMDB0028732|HMDB0015056	Hydroxyprolyl-Asparagine|Asparaginyl-Hydroxyproline|Ketotifen	72.7|71.2|0	3	M+FA-H	C9H15N3O5	51.8 | 51.5	1.92478	88.6497		290.1	1	8.939	0.236917	32862.1	35120	36217	37130.1	37832.7	34787.9	22015.9	21832.3	23445.9	25041.6	30697.4	30225.2	31071.5	26439.3	34573.3	31297.2	42718.2	31282.8	33115.2	42868.1	50377.7	62305.5	39505.8	40514.7	49559.3	53277.3		1.62852	0.00220889	0.00203861
7.46_523.1692m/z	L3	HMDB0038714 | HMDB0032134	Kelampayoside A | Gentiobiosyl 2-methyl-6-oxo-2E,4E-heptadienoate	2	Endogenous|Food	HMDB0038714|HMDB0032134	Kelampayoside A|Gentiobiosyl 2-methyl-6-oxo-2E,4E-heptadienoate	48.3|48.3	2	M+FA-H	C20H30O13	47.1	4.83542559107089 | 4.83542559118976	92.9761		523.169	1	7.45857	0.2277	15455.2	17062.9	15926.6	14878.5	14683.5	12246	14557.4	15058.9	13589.1	15849.6	15295.2	11990.6	12850.4	12610.9	10467.9	8780.85	29566.8	16315.1	16928	21347.4	32196.8	25130.6	7242.24	8569.26	10164.5	19394.1		1.56494	0.0202858	0.0134918
4.39_215.0825m/z	L3	HMDB0035665 | HMDB0002339	L-1,2,3,4-Tetrahydro-beta-carboline-3-carboxylic acid | 5-Methoxytryptophan	2	Endogenous|Food	HMDB0060968|HMDB0035665|HMDB0029747|HMDB0013894|HMDB0002339	4'-hydroxymephenytoin|L-1,2,3,4-Tetrahydro-beta-carboline-3-carboxylic acid|2-Amino-5-phenylpyridine|S-4-Hydroxymephenytoin|5-Methoxytryptophan	9.53|38.6|22.1|9.53|30	5	M-H | M-H2O-H	C12H12N2O2 | C12H14N2O3	46.9 | 45.2	-0.54183546816654 | -0.500130879074862	96.7621052013632 | 96.4297339089985		215.082	1	4.38952	0.40725	25114	25223.4	25068	26041	25593.8	24223.2	10153.1	6101.05	5407.7	10567.9	3819.48	21785.4	26374.7	43097.6	17076.4	18072.9	40833.8	13107	46827.8	53248.1	42408	43332.8	36626.6	20906	24040.4	39453.4		5.4488	0.00079534	0.000849843
8.90_154.0617m/z	L3	HMDB0034267 | HMDB0000177	L-2-Amino-3-(1-pyrazolyl)propanoic acid | L-Histidine	2	Food	HMDB0000177|HMDB0034267|HMDB0004225|HMDB0000177	[IHL:L-HISTIDINE]|L-2-Amino-3-(1-pyrazolyl)propanoic acid|2-Oxoarginine|L-Histidine	94.8|65.1|44.8|62.4	4	M-H	C6H9N3O2	50.7 | 50.2	-3.4361284748095 | -3.43612847499279	92.455		154.062	1	8.90397	0.26345	7412.34	7457.4	7414.41	7583.88	7671.34	7046.68	6500.12	5919.9	6699.27	7301.27	6835.56	9323.39	12627.5	24024	9696.92	11488.1	3632.58	8374.09	4674.23	5099.77	3937.03	7532.37	9788.34	9254.88	8035.79	5533.39		-1.29312	0.0801512	0.0434943
8.16_258.1825m/z	L3	HMDB0028934 | HMDB0028912	Leucyl-Lysine | Isoleucyl-Lysine	2	Endogenous	HMDB0028955|HMDB0028954|HMDB0028934|HMDB0028912	Lysyl-Leucine|Lysyl-Isoleucine|Leucyl-Lysine|Isoleucyl-Lysine	51.9|51.9|68.1|68.1	4	M-H	C12H25N3O3	52.6	0.663001	95.6732		258.182	1	8.16367	0.232083	12765.8	13320.1	13080	13528.1	13132.3	12560.6	5176.12	5909.3	6464.92	6161.17	4537.37	8281.88	9300.54	10089.4	7879.16	10495.9	16337.5	15792.5	14728.7	15721.6	14528.4	21455.2	20573.6	25475.3	23348.5	21770.9		2.72962	4.22e-07	1.58e-06
4.41_227.1401m/z	L3	HMDB0011175 | HMDB0011174	Leucylproline | Isoleucylproline	2	Endogenous	HMDB0011175|HMDB0011174	Leucylproline|Isoleucylproline	31.7|31.7	2	M-H	C11H20N2O3	45.5	-0.117908	96.1197		227.14	1	4.40703	0.2715	13466.3	14530.5	14151.7	15166.2	15564.2	12847.6	4886.83	5783.22	6866.9	7774.98	4446.03	10396	14854.4	15114.6	10698.1	14303.6	12835.8	11299.5	11839.5	13926.6	12658.4	20759.4	24644.6	30673.8	27000.4	25551.8		2.10229	0.000117818	0.000168133
5.10_227.1401m/z	L3	HMDB0011175 | HMDB0011174	Leucylproline | Isoleucylproline	2	Endogenous	HMDB0011175|HMDB0011174	Leucylproline|Isoleucylproline	24.5|24.5	2	M-H	C11H20N2O3	42.4	0.0484175	87.4504		227.14	1	5.10345	0.494983	49561.1	52662.8	52810.7	54505	53405.5	48342.3	20022.6	20183.1	20173.6	22231.4	17298.6	54982	60614.1	65562.7	55173.7	66506.2	61431.8	63319.7	56741.3	58737.1	53406.7	83014.6	77582.3	80646	78465.9	73838.5		2.93903	2.27e-08	2.07e-07
7.06_256.1306m/z	L3	HMDB0028950 | HMDB0004207	Lysyl-Glutamate | Glutamyllysine	2	Endogenous	HMDB0029154|HMDB0028950|HMDB0004207|HMDB0003869	gamma-Glutamyllysine|Lysyl-Glutamate|Glutamyllysine|Epsilon-(gamma-Glutamyl)-lysine	31.6|57.8|58.1|30.4	4	M-H2O-H	C11H21N3O5	50.5 | 50.6	1.0334	95.8724		256.131	1	7.06393	0.311483	18711	19248.7	19090.1	19016.9	18982.2	17723.8	13768	14231.9	14703.5	14803.5	13828.8	22202.4	24455.3	24734.3	23170.2	25373.9	15624	13820.6	13991.1	15130.8	14211.8	21385.1	19726.8	22649.7	21130.6	21620		1.02022	0.51167	0.198236
9.00_202.1196m/z	L3	HMDB0028951 | HMDB0028846	Lysyl-Glycine | Glycyl-Lysine	2	Endogenous	HMDB0028951|HMDB0028846	Lysyl-Glycine|Glycyl-Lysine	74.5|74.5	2	M-H	C8H17N3O3	53.8	-0.806411	95.2065		202.12	1	9.00032	0.162483	1664.36	1682.43	1748.51	1742.24	1721.52	1815.59	2790.44	2850.97	2790.29	2835.3	2880.78	1724.75	1656.32	1780.6	1867.27	1896.95	1290.42	1920.21	1430.25	1541.25	1431.8	1308.31	1378.92	1350.79	1420.96	1311.09		-1.85814	1.34e-05	2.6e-05
6.77_258.1462m/z	L3	HMDB0028952 | HMDB0028868	Lysyl-Hydroxyproline | Hydroxyprolyl-Lysine	2	Endogenous	HMDB0028952|HMDB0028943|HMDB0028927|HMDB0028921|HMDB0028905|HMDB0028868|HMDB0028801|HMDB0028800|HMDB0014371	Lysyl-Hydroxyproline|Leucyl-Gamma-glutamate|Leucyl-Glutamine|Isoleucyl-Gamma-glutamate|Isoleucyl-Glutamine|Hydroxyprolyl-Lysine|Glutaminylleucine|Glutaminylisoleucine|Guanadrel Sulfate	61.5|45.2|45.2|45.2|45.2|60.8|38.9|39.8|22.5	9	M-H	C11H21N3O4	49.5 | 49.4	0.929523	87.0732		258.146	1	6.7697	0.21925	18850.8	20187.4	19826.9	20117.7	20969	16261.4	1796.64	2738.73	2708.91	2603.6	1611.69	4379.36	6263.83	7758.73	4490.36	8645.75	26615.7	23272.6	22422.1	28028.1	23374	52951.4	46821.9	64472.2	54064.6	49800.7		10.7956	4.4e-08	3.14e-07
4.25_655.3847m/z	L3	HMDB0035917 | HMDB0029606	Momordicoside L | Maslinic acid 3-O-b-D-glucoside	2	Endogenous|Food	HMDB0116660|HMDB0039329|HMDB0038452|HMDB0035966|HMDB0035917|HMDB0029621|HMDB0029606	PG(i-12:0/i-12:0)|Soyasapogenol B 3-O-b-D-glucuronide|28-Glucosylpomolate|Momordicin II|Momordicoside L|Lucyoside Q|Maslinic acid 3-O-b-D-glucoside	0|15|3.74|0.844|20.9|3.74|33	7	M+Na-2H	C36H58O9	41.6 | 44.1	3.04666	90.9109		655.385	1	4.245	0.372333	39288.9	40921.2	39915.6	41585.8	42884.9	35256.8	10002.6	11395.2	13285.6	11857	8590.49	31200.7	42729.5	43797.1	29574.4	43813.7	42995.5	34766.5	35581	39024.7	39278	70235.9	64781.2	76938	73208.5	71565.1		3.47619	4.03e-07	1.54e-06
8.55_362.1211m/z	L3	HMDB0037839 | HMDB0032864	N-(1-Deoxy-1-fructosyl)histidine | Mycotoxin T 2	2	Food	HMDB0037839|HMDB0032864	N-(1-Deoxy-1-fructosyl)histidine|Mycotoxin T 2	20.6|15.2	2	M+FA-H | M+Na-2H	C12H19N3O7 | C16H23NO7	42.9 | 40.8	1.87736253835545 | -2.99493708013102	95.9958822657442 | 92.5910885497195		362.121	1	8.5534	0.310917	7080.91	7523.84	6935.68	6453.74	6480.86	6035.48	3447.18	4038.2	3850.23	4020.87	3413.2	7458.24	8890.04	10051.4	8127.85	9228.4	4750.92	5052.18	4724.11	5608.03	5269.74	7419.1	7772.88	9357.55	8162.66	7687.26		1.35351	0.000259713	0.000332022
6.80_311.1235n	L3	HMDB0004824 | HMDB0001961	N2,N2-Dimethylguanosine | 1,7-Dimethylguanosine	2	Endogenous	HMDB0004824|HMDB0001961	N2,N2-Dimethylguanosine|1,7-Dimethylguanosine	41.3|29.4	2	M-H, M+Na-2H	C12H17N5O5	46.6 | 44.2	1.86072470678817 | 1.86072470697088	93.7276	311.124	310.116	1	6.80473	0.166683	7267.27	7309.53	7156.85	6897.18	7010.21	6601.23	3336.71	3483.77	3335.5	3669.81	2943.79	5817.39	7232.58	9533.64	5207.94	5069.73	7931.02	8223.3	7425.25	9107.66	7945.61	10013.2	9869.2	9041.95	8826.58	8084.37		2.42301	9.72e-08	5.27e-07
7.52_290.0886m/z	L3	HMDB0000773 | HMDB0000230	N-Acetyl-a-neuraminic acid | N-Acetylneuraminic acid	2	Endogenous|Food	HMDB0000773|HMDB0000230	N-Acetyl-a-neuraminic acid|N-Acetylneuraminic acid	46.3|46.3	2	M-H2O-H	C11H19NO9	47.8	1.36188	94.2575		290.089	1	7.5155	0.398633	30753.4	31374.6	31022	30491.1	31381.5	27518.5	19216.6	21104.4	22009.4	22663.1	20970.1	41179	48915.1	42566.8	42852.6	49004.4	24218.7	18192.9	19883.3	23235.6	21643.7	43084.7	32044.1	34236.9	28722.2	38795.3		1.01143	0.900945	0.302254
7.15_290.0886m/z	L3	HMDB0000773 | HMDB0000230	N-Acetyl-a-neuraminic acid | N-Acetylneuraminic acid	2	Endogenous|Food	HMDB0000773|HMDB0000230	N-Acetyl-a-neuraminic acid|N-Acetylneuraminic acid	42.2|42.2	2	M-H2O-H	C11H19NO9	47.1	1.47969	95.2455		290.089	1	7.15152	0.557367	26923.5	29627.9	29766.9	30109.5	30586.6	24085.8	18889.5	18593.4	18800.5	19458.9	19250.6	35346.5	41810.5	43662.6	37568.9	46129.5	19911.3	15680.3	16096.1	19160.2	16621.3	36306.9	31076.7	40108.9	35975	33433		-1.08602	0.112786	0.0579113
9.22_545.1971n	L3	HMDB0041622 | HMDB0006592	N-Acetylgalactosaminyl lactose | Lacto-N-triaose	2	Endogenous|Food	HMDB0041622|HMDB0039750|HMDB0006592	N-Acetylgalactosaminyl lactose|Lacto-N-triose I|Lacto-N-triaose	92.6|55.7|92.2	3	M-H, M+FA-H	C20H35NO16	57.5 | 57.4	2.78769	98.3304	545.197	590.195	1	9.2243	0.447567	2.38608e+06	2.38871e+06	2.41061e+06	2.38311e+06	2.38887e+06	2.50212e+06	677391	710510	755357	692653	1.06687e+06	2.72225e+06	2.52296e+06	2.46454e+06	2.69298e+06	2.50736e+06	164891	42335.6	123457	146637	267590	4.67134e+06	3.88621e+06	3.8997e+06	4.24599e+06	4.54946e+06		-5.23926	0.000459572	0.000538737
6.83_187.1085m/z	L3	HMDB0000446 | HMDB0000206	N-Alpha-acetyllysine | N6-Acetyl-L-lysine	2	Endogenous|Food	HMDB0000446|HMDB0029120|HMDB0028929|HMDB0028907|HMDB0028844|HMDB0028700|HMDB0000759|HMDB0000446|HMDB0000206	[IHL:N-ALPHA-ACETYLLYSINE]|Valyl-Alanine|Leucyl-Glycine|Isoleucyl-Glycine|Glycyl-Isoleucine|Alanyl-Valine|Glycylleucine|N-Alpha-acetyllysine|N6-Acetyl-L-lysine	0|8.43|7.97|4.98|9.17|8.84|9.17|36.2|35.4	9	M-H	C8H16N2O3	46.3 | 46.1	-1.63612	97.0703		187.109	1	6.82663	0.166683	4924.8	5446.41	5362.78	5084.54	5264.46	4352.46	5469.18	5852.12	5211.71	5723.22	6307.62	4789.36	5141.29	4897.26	5292.2	4772.39	3231.57	2474.91	3005.95	3589.88	3197.88	7036.69	5504.79	5772.66	5865.51	6299.84		-1.84281	2.04e-05	3.63e-05
4.51_302.1626m/z	L3	HMDB0028989 | HMDB0028716	Phenylalanyl-Arginine | Arginyl-Phenylalanine	2	Endogenous	HMDB0028989|HMDB0028716	Phenylalanyl-Arginine|Arginyl-Phenylalanine	55|55	2	M-H2O-H	C15H23N5O3	49.5	0.975466491975211 | 0.975466491798228	93.8546		302.163	1	4.50775	0.23645	6478.24	6477.05	6543.01	6564.3	6553.55	6489.24	6249.42	6060.95	6496.17	6197.19	6132.52	7146.26	7421.23	7353.12	7525.53	7755.39	6221.3	6341.19	6167.59	5806.65	5943.06	6071.61	6370.18	6926.19	7014.62	6977.46		-1.02154	0.310234	0.133738
9.67_558.0658m/z	L3	HMDB0012276 | HMDB0001178	Phosphoribosyl-AMP | Adenosine diphosphate ribose	2	Endogenous	HMDB0012278|HMDB0012277|HMDB0012276|HMDB0001178	Phosphoribulosylformimino-AICAR-P|PhosphoribosylformiminoAICAR-phosphate|Phosphoribosyl-AMP|Adenosine diphosphate ribose	40.1|40.1|42.6|56.2	4	M-H	C15H23N5O14P2	46.5 | 49.2	2.42517	92.7976		558.066	1	9.66723	0.3073	30540.9	32149.6	32449.1	33897.3	33393	29873.3	34665.2	32429.7	29346.2	33693.8	33597.1	21578.6	20954.6	39831.5	22124	21347.8	23869.8	52257.7	39322.6	40145.3	23215.5	18187.1	29112.5	29039.7	32956.7	18516.1		1.0921	0.808476	0.279736
7.99_540.0525m/z	L3	HMDB0012276 | HMDB0001178	Phosphoribosyl-AMP | Adenosine diphosphate ribose	2	Endogenous	HMDB0012276|HMDB0001178	Phosphoribosyl-AMP|Adenosine diphosphate ribose	46.6|52.3	2	M-H2O-H	C15H23N5O14P2	46.9 | 48	-2.32425	90.519		540.053	1	7.99288	0.218933	12327.4	11989.9	11675.4	11562.1	10834.9	12763.7	14089.4	16021.5	15554.4	13589.4	13729.7	4526.19	4201.93	10605.2	4313.41	3728.22	10238	29902.6	22429	24478.3	10302.3	4314.63	5005.27	5658.05	5235.26	4135.19		1.33385	0.421181	0.169739
4.68_233.1044m/z	L3	HMDB0029019 | HMDB0028893	Prolyl-Histidine | Histidinyl-Proline	2	Endogenous	HMDB0029019|HMDB0028893	Prolyl-Histidine|Histidinyl-Proline	30.8|41.8	2	M-H2O-H	C11H16N4O3	43.6 | 45.8	0.0487315	87.1339		233.104	1	4.6829	0.494983	56797	59074.5	58724.3	57802.8	58101.6	55453.1	30650.9	31790.7	29775.2	35993.4	25375.5	45470.1	57487.9	83447.4	41049.5	45379.7	63446.3	52969.4	57587.6	65741.1	60574.9	85451.8	81888	87540.4	89209.6	77751.8		1.95539	9.01e-06	1.87e-05
8.79_242.1512m/z	L3	HMDB0029022 | HMDB0028959	Prolyl-Lysine | Lysyl-Proline	2	Endogenous	HMDB0029022|HMDB0028959	Prolyl-Lysine|Lysyl-Proline	38.2|33.9	2	M-H	C11H21N3O3	46.5 | 45.7	0.76521	95.4476		242.151	1	8.78548	0.42945	8443.34	8931.02	8875.85	9051.71	8937.42	8676.92	4361.52	4353.91	4628.59	4851.78	4601.31	5962.03	6441.57	6662.33	6539.31	6946.18	14012.4	12568.2	12083.5	13833.1	13020	13238.6	11587	12504.7	12047.8	11640.4		2.87393	1.48e-09	2.9e-08
8.96_302.0997m/z	L3	HMDB0039229 | HMDB0000982	Pyro-L-glutaminyl-L-glutamine | 5-Methylcytidine	2	Endogenous|Food	HMDB0039229|HMDB0031787|HMDB0000982	Pyro-L-glutaminyl-L-glutamine|Fenamiphos|5-Methylcytidine	57.8|0|54.6	3	M+FA-H	C10H15N3O5	50.8 | 50.1	1.37505664068118 | 1.37505664090227	97.7713		302.1	1	8.95652	0.2632	25790.9	27244.8	27862	29097.2	29904.2	27538.5	11358.5	10406.1	11165.5	12219.8	13110.6	23367	25282.9	23714.6	26911.4	26255.7	24248.4	32770	27814.5	26001.7	26808.8	48837.9	38937.4	42081.3	45904.1	45688		2.36255	9.14e-07	2.97e-06
4.86_200.0675m/z	L3	HMDB0029034 | HMDB0028740	Serylasparagine | Asparaginyl-Serine	2	Endogenous	HMDB0034267|HMDB0029034|HMDB0028740|HMDB0000177	L-2-Amino-3-(1-pyrazolyl)propanoic acid|Serylasparagine|Asparaginyl-Serine|L-Histidine	39|60.4|57|3.21	4	M-H2O-H	C7H13N3O5	50.9 | 50.2	-1.00795	95.2194		200.067	1	4.85807	0.2235	3414.87	3449.15	3509.25	3473.88	3532.15	3279.54	2422.22	2351.16	2546.8	2683.6	2516.29	3824.91	4305.47	4187.41	3983.58	4544.28	3654.81	2497.46	3642.16	3449.26	3184.53	4597.84	3735.81	4105.59	4021.17	4482.6		1.31215	0.00756484	0.00585037
8.79_218.0782m/z	L3	HMDB0029034 | HMDB0028740	Serylasparagine | Asparaginyl-Serine	2	Endogenous	HMDB0029034|HMDB0028740|HMDB0004225	Serylasparagine|Asparaginyl-Serine|2-Oxoarginine	54.6|49.4|23.8	3	M-H	C7H13N3O5	49 | 47.9	-0.327209	90.6561		218.078	1	8.78987	0.136	5845.62	6198.94	5884	5403.7	5331.42	5584.25	2387.09	3520.73	2717.44	2502.16	2427.39	1436.62	1431.02	1719.39	1293.62	1104.23	11466.6	14501.3	9658.81	13240.2	12373.1	11743.2	9460.04	9435.08	8220.38	8052.15		4.51795	3.5e-07	1.38e-06
2.99_189.0336m/z	L3	HMDB0029036 | HMDB0028784	Serylcysteine | Cysteinyl-Serine	2	Endogenous	HMDB0029036|HMDB0028784	Serylcysteine|Cysteinyl-Serine	43.3|42.6	2	M-H2O-H	C6H12N2O4S	45.8 | 45.6	-1.6467	87.4993		189.034	1	2.9918	0.3109	21554.3	22324.8	22293.6	22185.6	22196.2	20853.3	666.904	672.633	635.19	855.875	354.375	388.767	816.458	37969.8	60.1609	134.543	15832.8	89036	35706.3	45956.2	19156.5	27880.5	45262.7	48668.3	50984.1	4540.16		64.5807	2.65e-06	6.72e-06
9.63_232.1303m/z	L3	HMDB0029044 | HMDB0028960	Seryllysine | Lysyl-Serine	2	Endogenous	HMDB0029447|HMDB0029044|HMDB0028960	Lysinoalanine|Seryllysine|Lysyl-Serine	15.1|50.5|41.4	3	M-H	C9H19N3O4	47.8 | 46	0.264365	89.053		232.13	1	9.62782	0.245983	15247.6	15580.7	15904.2	16287.2	16004.2	15299	8366.7	8636.2	9480.67	9203.91	7972.97	14150	16047.1	16252.6	14020.6	16197.7	18627.7	18190.8	16500.6	17689.3	16826.6	22974.3	22665	25927.4	24093.6	22582.5		2.01177	9.27e-08	5.05e-07
7.85_214.0484m/z	L3	HMDB0059660 | HMDB0035360	sn-glycero-3-Phosphoethanolamine | N-Methyl-1-deoxynojirimycin	2	Food	HMDB0060758|HMDB0060389|HMDB0060366|HMDB0060244|HMDB0059660|HMDB0035360|HMDB0034250|HMDB0032388|HMDB0013292|HMDB0013245|HMDB0011723|HMDB0000859|HMDB0000821|HMDB0000114	4-Anilino-4-oxobutanoic acid|4-Hydroxy-5-phenyltetrahydro-1,3-oxazin-2-one|3-Carbamoyl-2-phenylpropionaldehyde|Phosphodimethylethanolamine|sn-glycero-3-Phosphoethanolamine|N-Methyl-1-deoxynojirimycin|Betamipron|Methyl n-acetylanthranilate|p-Methylhippuric acid|m-Methylhippuric acid|2-Methylhippuric acid|Methyl hippurate|Phenylacetylglycine|Glycerylphosphorylethanolamine	33.8|0|0|6.82|65|68.3|34|0|0|0|0|34|0|42	14	M-H | M+K-2H	C5H14NO6P | C7H15NO4	51.4 | 51.6	-0.864358833870541 | -1.70355850008769	93.2104240136211 | 91.6534460933477		214.048	1	7.85277	0.315367	940991	947838	955900	959779	946993	935974	638169	641848	625352	573331	625649	403328	387504	1.35205e+06	405910	353586	600130	1.97448e+06	724705	1.05042e+06	584988	517144	1.97313e+06	1.94177e+06	1.95453e+06	454561		1.58962	0.164454	0.0795124
9.22_274.1525m/z	L3	HMDB0029055 | HMDB0028719	Threoninyl-Arginine | Arginyl-Threonine	2	Endogenous	HMDB0029055|HMDB0028719	Threoninyl-Arginine|Arginyl-Threonine	73|61.4	2	M-H	C10H21N5O4	51.6 | 49.3	1.61267	87.1424		274.153	1	9.21993	0.206017	4274.4	4318.79	4306.13	4423.31	4407.82	4293.11	1548.68	1900.11	1928.69	1788.57	1175.73	1753.82	2123.48	2187.28	1678.03	2365.64	7931.8	7481.77	7290.06	7724.38	7560.77	7550.02	7087.17	8003.71	7523.56	7609.64		4.55403	1.89e-07	9.03e-07
8.90_255.1102m/z	L3	HMDB0029063 | HMDB0028895	Threoninyl-Histidine | Histidinyl-Threonine	2	Endogenous	HMDB0062558|HMDB0032764|HMDB0031547|HMDB0029874|HMDB0029163|HMDB0029063|HMDB0028895|HMDB0028811|HMDB0028795|HMDB0011655|HMDB0000079	Pyroglutamine|N2-Succinoylarginine|L-Cyclo(alanylglycyl)|Squamolone|Gamma-glutamyl-Gamma-glutamate|Threoninyl-Histidine|Histidinyl-Threonine|Glutaminyl-Gamma-glutamate|Glutaminylglutamine|2-(3-Carboxy-3-aminopropyl)-L-histidine|Dihydrothymine	1.89|2.74|1.77|2.41|7.62|25.7|23.6|7.62|4.07|7.08|0	11	M-H	C10H16N4O4	43.9 | 43.5	1.1315	95.0807		255.11	1	8.90397	0.175417	4194.29	4417.6	4348.53	4300.22	4474.86	3925.22	1054.22	1054.65	1104.56	1298.92	1000.8	1798.16	2423.5	3817.06	1649.76	2228.81	3285.17	5396.5	3362.77	4794.14	3638.38	6802.21	8455.87	8907.77	7869.03	5609.67		3.71421	2.41e-06	6.33e-06
9.35_246.1461m/z	L3	HMDB0029066 | HMDB0028961	Threoninyl-Lysine | Lysyl-Threonine	2	Endogenous	HMDB0029066|HMDB0028961	Threoninyl-Lysine|Lysyl-Threonine	58.4|50.4	2	M-H	C10H21N3O4	49.2 | 47.6	0.510684	87.9414		246.146	1	9.35153	0.2805	17115.4	17142.9	17446.2	17698	17716.1	17523.9	8225.77	8977.81	9848.72	9686.39	6539.6	13128.2	15697.8	16041.5	12410.8	16767.8	29903.1	27821	26439.5	28766.6	26211.3	24621.9	23263.3	27079.7	24759.5	23763.9		3.21504	3.92e-07	1.51e-06
7.06_215.1036m/z	L3	HMDB0029069 | HMDB0029027	Threoninyl-Proline | Prolyl-Threonine	2	Endogenous	HMDB0038239|HMDB0033926|HMDB0029069|HMDB0029027|HMDB0015333	Sakacin P|(3xi,6xi)-Cyclo(alanylvalyl)|Threoninyl-Proline|Prolyl-Threonine|Levetiracetam	1.77|0.955|46.1|39.9|6.81	5	M-H	C9H16N2O4	48.4 | 47.2	-0.64015	96.7739		215.104	1	7.05518	0.50005	18483.7	20019.3	19480.7	18592.8	18510.6	14459.6	13963.6	14058.4	13308.1	15307.3	17947.2	21054.3	24580.5	24737.6	24481	22925.8	17139.4	14812.5	13874.2	18278.4	15649.4	20787.6	17453.2	20328.4	18853.2	17934.2		1.06931	0.375429	0.154548
6.99_227.0650m/z	L3	HMDB0029070 | HMDB0029049	Threoninyl-Serine | Serylthreonine	2	Endogenous	HMDB0029070|HMDB0029049	Threoninyl-Serine|Serylthreonine	29.1|31.1	2	M+Na-2H	C7H14N2O5	44.9 | 45.3	0.306744	95.9315		227.065	1	6.98933	0.1407	1652.56	1593.25	1664.27	1743.57	1778.98	2072.24	3736.04	4230.95	4478.52	4207.36	3948.12	1849.85	1625.21	1423.25	1696.98	1447.44	2646.32	1616.35	3231.07	1704.98	2244.53	760.559	654.391	464.872	591.471	823.572		-1.80027	0.0017252	0.00165626
4.77_254.1625m/z	L3	HMDB0029121 | HMDB0028722	Valyl-Arginine | Arginyl-Valine	2	Endogenous	HMDB0029121|HMDB0028722	Valyl-Arginine|Arginyl-Valine	60.9|60.9	2	M-H2O-H	C11H23N5O3	50.7	0.964676	93.5695		254.163	1	4.77048	0.201433	3795.19	3832.1	3823.85	3806.98	3740.96	3703.92	3181.93	3502.59	3441.79	3625.69	3813.49	4111.67	4426.72	4363.24	4567.53	4376.62	3508.96	3109.29	3371.33	3469.49	3566.9	3953.67	3590.73	3954.16	3995.48	4296.49		-1.03169	0.450533	0.179262
8.42_272.1732m/z	L3	HMDB0029121 | HMDB0028722	Valyl-Arginine | Arginyl-Valine	2	Endogenous	HMDB0029121|HMDB0028722	Valyl-Arginine|Arginyl-Valine	61.3|56.5	2	M-H	C11H23N5O3	50.5 | 49.6	1.33945	93.0271		272.173	1	8.42203	0.197067	5518.72	5737.83	5517.32	5793.65	5822.13	5246.53	1378.34	1378.74	1513.21	1315.51	1092.63	1305.51	1663.45	1739.37	1450.28	1784.77	8739.15	8601.51	7495.56	8598.72	8103.9	11272.5	10734.1	12625.8	12058.4	12034.5		6.21985	1.62e-09	3.04e-08
7.45_230.1146m/z	L3	HMDB0029122 | HMDB0028744	Valyl-Asparagine | Asparaginyl-Valine	2	Endogenous	HMDB0029122|HMDB0028744	Valyl-Asparagine|Asparaginyl-Valine	47.6|41	2	M-H	C9H17N3O4	48.4 | 47.1	-0.169587	94.7546		230.115	1	7.44982	0.17955	3831.55	4057.69	4009.22	3901.01	4105.98	3329.85	648.165	727.859	702.07	648.338	610.856	1545.26	1862.95	1734.88	1594.6	2120.58	5459.06	4092.28	4286.82	5295.63	5003.14	8661.74	6359.01	8500.94	7320.79	9280.21		7.2325	1.59e-09	3.04e-08
6.76_217.1193m/z	L3	HMDB0029137 | HMDB0029074	Valyl-Threonine | Threoninyl-Valine	2	Endogenous	HMDB0041313|HMDB0033675|HMDB0029137|HMDB0029074|HMDB0029043|HMDB0029042|HMDB0028938|HMDB0028916|HMDB0014515	Pantothenamide|L-Lysopine|Valyl-Threonine|Threoninyl-Valine|Serylleucine|Serylisoleucine|Leucyl-Serine|Isoleucyl-Serine|Meprobamate	6.97|4.95|40.6|40.9|9.81|9.81|17.5|17.5|1.18	9	M-H	C9H18N2O4	45.9	-0.480892	89.2262		217.119	1	6.76093	0.21925	14286.9	15949.2	15333.9	15050.9	14861.1	10794.7	2622.01	3062.75	2862.54	2999.81	2827.15	5500.37	6762.37	7864.72	5687.71	7889.75	20533.2	19194.2	18502.1	23582.7	18853.3	37554.5	30636.8	40501.3	33794.5	31541.9		7.00318	2.78e-10	9.3e-09
6.75_223.0836m/z	L3	HMDB0040248 | HMDB0029041 | HMDB0028894	(S,S)-Nt-Histidinylalanine | Serylhistidine | Histidinyl-Serine	3	Endogenous|Food	HMDB0040348|HMDB0040249|HMDB0040248|HMDB0029569|HMDB0029041|HMDB0028894|HMDB0004328	1,8-Octanedithiol|(S,S)-Np-Histidinylalanine|(S,S)-Nt-Histidinylalanine|Dibutyl disulfide|Serylhistidine|Histidinyl-Serine|Temurin	0|6.17|30.2|0|27.7|28.4|2.82	7	M-H2O-H	C9H14N4O4	43.8 | 43.3 | 43.4	-0.119387	88.7212		223.084	1	6.75218	0.192717	6259.02	6268.48	6490.96	7009.63	7403.22	7144.64	3803.44	3501.62	3745.15	4309.04	3170.22	5317.32	6427.63	7704.93	5390.38	5858.11	7653.62	9723	6484.37	7864.53	7611.22	10923.6	11607.2	10708.2	10062.2	9025.97		2.12293	1.67e-05	3.06e-05
1.66_137.0238m/z	L3	HMDB0000500 | HMDB0001895 | HMDB0002466	4-HYDROXYBENZOATE | SALICYLATE | 3-HYDROXYBENZOATE	3	Endogenous|Food	HMDB0140891|HMDB0140890|HMDB0125077|HMDB0125064|HMDB0062484|HMDB0059965|HMDB0059731|HMDB0033812|HMDB0032920|HMDB0032576|HMDB0029610|HMDB0004062|HMDB0002466|HMDB0001895|HMDB0000500|HMDB0000500|HMDB0001895|HMDB0002466	5-methoxybenzene-1,2,3-triol|6-methoxybenzene-1,2,4-triol|2-methoxybenzene-1,3,5-triol|4-methoxybenzene-1,2,3-triol|keratan sulfate II (core 2-linked), degradation product 1|3,4-Dihydroxybenzaldehyde|2,3-Methyleneglutaric acid|Sesamol|alpha-Furyl methyl diketone|2-Methoxy-1,4-benzoquinone|Ascladiol|Gentisate aldehyde|3-Hydroxybenzoic acid|Salicylic acid|4-Hydroxybenzoic acid|4-HYDROXYBENZOATE|SAL…	0|0|0|0|0|0|26|22.1|0|0|26.5|0|27.6|27.6|27.6|0|0|0	18	M-H	C7H6O3	39.2	-4.77346	97.1919		137.024	1	1.66445	0.372217	8323.17	8550.71	8668.12	8420.05	8286.55	7671.86	9814.96	9011.32	8294.07	9473.44	8699.13	10731.7	9255.19	9417.56	9301.84	8635.46	8173.27	9943.97	8986.39	10364.1	9778.18	7622.47	6884.62	6476.33	6700.67	6587.64		1.04312	0.457094	0.180921
1.46_151.0395m/z	L3	HMDB0000020 | HMDB0000440 | HMDB0000669	4-HYDROXYPHENYLACETATE | 3-HYDROXYPHENYLACETATE | 2-HYDROXYPHENYLACETIC ACID	3	Endogenous|Food|Microbe	HMDB0137457|HMDB0133982|HMDB0133972|HMDB0133971|HMDB0132907|HMDB0132906|HMDB0125528|HMDB0124926|HMDB0062635|HMDB0060390|HMDB0059756|HMDB0041283|HMDB0038761|HMDB0038760|HMDB0036907|HMDB0034172|HMDB0033003|HMDB0032966|HMDB0032919|HMDB0032629|HMDB0032606|HMDB0032604|HMDB0032594|HMDB0032572|HMDB0032399|HMDB0031609|HMDB0029662|HMDB0029661|HMDB0029660|HMDB0029659|HMDB0029658|HMDB0029657|HMDB0012308|HMD…	4-[(E)-2-hydroxyethenylbenzene-1,2-diol|4,5-dimethoxybenzene-1,3-diol|2,3-dimethoxybenzene-1,4-diol|3,4-dimethoxybenzene-1,2-diol|2,6-dimethoxybenzene-1,4-diol|3,5-dimethoxybenzene-1,2-diol|5-ethenylbenzene-1,2,3-triol|2-hydroxy-2-phenylacetic acid|(R)-mandelic Acid|4-Hydroxyphenyl acetate|3,4-Methyleneadipic acid|1-(2-Furanyl)-1,3-butanedione|Herierin IV|Herierin III|2-Propenyl 2-furancarboxylat…	0|16.2|16.2|16.2|16.2|16.2|13.6|57.2|57.2|16.2|68.3|16.2|16.2|16.2|13.6|16.1|16.2|16.2|16.2|16.2|73.4|73.4|57.2|16.1|16.1|57.2|16.2|16.2|16.2|16.2|16.2|0|16.1|73.4|0|73.4|73.4|57.2|57.2|57.2|0|57.2|0|0|0|0|0	47	M-H	C8H8O3	47.4	-4.10076	95.5705		151.039	1	1.46302	0.24085	3200.3	3113.05	3117.52	3158.64	3278.58	3329.44	7159.01	7275.64	8242.08	7509.03	7057.95	3462.03	4098.48	4344.09	3310.11	3140.24	465.549	501.277	471.293	537.354	481.362	735.138	741.005	808.036	786.035	577.494		-15.1592	1.61e-12	1.15e-10
1.92_175.0971m/z	L3	HMDB0000039 | HMDB0001873 | HMDB0003243	BUTANOATE | ISOBUTYRATE | ACETOIN	3	Endogenous|Food	HMDB0094708|HMDB0040579|HMDB0040297|HMDB0040253|HMDB0039619|HMDB0039618|HMDB0039095|HMDB0038227|HMDB0036238|HMDB0036237|HMDB0036209|HMDB0035238|HMDB0034239|HMDB0034166|HMDB0033745|HMDB0032874|HMDB0032204|HMDB0031600|HMDB0031595|HMDB0031594|HMDB0031528|HMDB0031507|HMDB0031217|HMDB0030062|HMDB0030052|HMDB0030028|HMDB0003243|HMDB0001873|HMDB0000666|HMDB0000039|HMDB0000039|HMDB0001873|HMDB0003243	Tetraethylene glycol|Isopropyl formate|Ethyl pentanoate|Propyl formate|Isopropyl butyrate|Propyl butyrate|Pentyl acetate|Isopropyl 2-methylpropanoate|Methyl 4-methylpentanoate|Methyl (Â±)-2-methylpentanoate|Propyl 2-methylpropanoate|Methyl hexanoate|2-Methylpropyl propanoate|2-Methylbutyl acetate|Ethyl 2-methylbutyrate|Hexyl formate|cis- and trans-2-Isopropyl-4-methyl-1,3-dioxolane|(Â±)-2-Pentano…	0|0|0|0|0|0|0|0|0|0|0|0|0|0|0|0|0|0|0|0|0|0|0|0|0|0|0|0|0|0|0|0|0	33	2M-H	C4H8O2	47	-2.53665	97.7453		175.097	1	1.91843	0.126983	844.53	917.64	825.588	862.125	834.503	716.767	677.265	572.27	642.381	592.343	650.456	783.136	765.449	1081.6	807.969	873.049	320.403	533.57	408.81	286.902	428.09	348.754	580.946	589.414	524.822	492.56		-1.58497	0.0028922	0.00256757
6.30_180.0634n	L3	HMDB0000122 | HMDB0003345 | HMDB000014	D-Glucose | ALPHA-D-GLUCOSE | GALACTOSE	3	Endogenous|Food	HMDB0003418|HMDB0000169|HMDB0000660|HMDB0001266|HMDB0240211|HMDB0240210|HMDB0240209|HMDB0240208|HMDB0240207|HMDB0125599|HMDB0062538|HMDB0062473|HMDB0062202|HMDB0062138|HMDB0061922|HMDB0034220|HMDB0033704|HMDB0032222|HMDB0012326|HMDB0006088|HMDB0003449|HMDB0003418|HMDB0003345|HMDB0001266|HMDB0001151|HMDB0000660|HMDB0000516|HMDB0000346|HMDB0000211|HMDB0000169|HMDB0000143|HMDB0000122|HMDB0000122|HMD…	TAGATOSE|MANNOSE|FRUCTOSE|SORBOSE|allo-inositol|cis-inositol|D-chiro-inositol|neo-inositol|epi-Inositol|2,5-bis(hydroxymethyl)oxolane-2,3,4-triol|Fructose-1P|Glycoprotein-phospho-D-mannose|3(S)-hydroxy-all-cis-8,11,14,17-eicosatetraenoyl-CoA|muco-Inositol|Alpha-D-Glucopyranoside|Levoinositol|L-Galactose|Dihydroxyacetone (dimer)|L-Gulose|scyllo-Inositol|Beta-D-Galactose|D-Tagatose|Alpha-D-Glucose|…	0|0|0|0|7.95|7.95|7.95|7.95|7.95|9.59|9.04|9.04|9.59|7.95|9.59|7.95|9.53|9.59|9.59|7.95|9.59|9.04|9.59|9.04|9.59|9.04|9.59|9.1|7.95|9.53|9.53|9.59|0|0|0	35	M-H2O-H, M-H, M+FA-H	C6H12O6	41.5	0.0149049	99.577	180.063	179.056	1	6.29582	0.412683	44826.3	45753.6	45487.2	46708	46278.5	44542.7	37619.3	39487.6	42844.5	40086.2	39439.9	51945	59746.8	62602.1	57325	62356.3	39124.1	29604.3	39818.9	42316.5	35699.6	51382.4	38080.5	43800.4	48933	49136.9		-1.06922	0.295634	0.128606
6.12_182.0787n	L3	HMDB0000107 | HMDB0000247 | HMDB0000765	GALACTITOL | SORBITOL | MANNITOL	3	Endogenous|Food	HMDB0011632|HMDB0000765|HMDB0000247|HMDB0000107|HMDB0000107|HMDB0000247|HMDB0000765	L-Iditol|Mannitol|Sorbitol|Galactitol|GALACTITOL|SORBITOL|MANNITOL	20.5|20.5|20.5|20.5|0|0|0	7	M-H, M+FA-H	C6H14O6	41.3	-2.12388	98.8908	182.079	181.071	1	6.12013	0.3202	65026.4	65870	65862.6	65667.7	65097.7	62495.6	57169.6	50904.9	49199.9	51030.2	63991.1	37423.8	40323.2	41743	40705.7	52742.5	34938.8	73988.3	34976.5	33101.5	59244.6	39739	36762.3	236963	95729.4	39945.5		-1.15258	0.292263	0.127582
7.13_119.0575n	L3	HMDB0000167 | HMDB0000719 | HMDB0004041	L-THREONINE | HOMOSERINE | L-ALLOTHREONINE	3	Endogenous|Food	HMDB0000167|HMDB0000719|HMDB0004041	L-THREONINE|HOMOSERINE|L-ALLOTHREONINE	0|0|0	3	M-H, 2M-H	C4H9NO3	39.7	-5.82059	95.0367	119.058	118.05	1	7.12525	0.460883	232095	237675	235644	233025	235427	226157	267041	263959	254601	262099	268468	294981	296539	301220	303966	289240	197822	160442	171771	197782	194721	238561	191958	186685	181601	201529		-1.42668	3.87e-05	6.32e-05
5.15_151.0606m/z	L3	HMDB0000508 | HMDB0001851 | HMDB0002917	RIBITOL | ARABITOL | XYLITOL	3	Endogenous|Food	HMDB0000508|HMDB0001851|HMDB0002917|HMDB0033730|HMDB0002917|HMDB0001851|HMDB0000568|HMDB0000508	RIBITOL|ARABITOL|XYLITOL|L-2-(Hydroxymethyl)-1,2,3,4-butanetetrol|D-Xylitol|L-Arabitol|D-Arabitol|Ribitol	0|0|0|0|0|0|0|0	8	M-H	C5H12O5	42	-3.76209	95.5029		151.061	1	5.14723	0.232083	1094.52	1128.29	1153.95	1187.88	1209.51	1162.76	1491.42	1212.46	1203.52	1335.84	1325.41	2070.82	2396.63	2328.53	2200.25	2240.62	927.337	765.376	798.71	873.322	921.409	1243.41	980.549	995.557	1049.92	1152.59		-1.53253	5.3e-05	8.28e-05
4.14_633.1020m/z	L3	HMDB0135146 | HMDB0135145 | HMDB0135144	{[1-(2,4-dihydroxyphenyl)-3-(3-hydroxyphenyl)-1-[3,5,7-trihydroxy-2-(3-hydroxyphenyl)-3,4-dihydro-2H-1-benzopyran-8-yl]propan-2-yl]oxy}sulfonic acid | (3-{8-[1-(2,4-dihydroxyphenyl)-2-hydroxy-3-(3-hydroxyphenyl)propyl]-3,5,7-trihydroxy-3,4-dihydro-2H-1-benzopyran-2-yl}phenyl)oxidanesulfonic acid | {3-[3-(2,4-dihydroxyphenyl)-2-hydroxy-3-[3,5,7-trihydroxy-2-(3-hydroxyphenyl)-3,4-dihydro-2H-1-benzo…	3	Endogenous	HMDB0135146|HMDB0135145|HMDB0135144|HMDB0039922	{[1-(2,4-dihydroxyphenyl)-3-(3-hydroxyphenyl)-1-[3,5,7-trihydroxy-2-(3-hydroxyphenyl)-3,4-dihydro-2H-1-benzopyran-8-yl]propan-2-yl]oxy}sulfonic acid|(3-{8-[1-(2,4-dihydroxyphenyl)-2-hydroxy-3-(3-hydroxyphenyl)propyl]-3,5,7-trihydroxy-3,4-dihydro-2H-1-benzopyran-2-yl}phenyl)oxidanesulfonic acid|{3-[3-(2,4-dihydroxyphenyl)-2-hydroxy-3-[3,5,7-trihydroxy-2-(3-hydroxyphenyl)-3,4-dihydro-2H-1-benzopyra…	50|54.6|50|18.1	4	M+Na-2H	C30H28O12S	45.1 | 46 | 45.1	-4.60189	80.6466		633.102	1	4.13988	0.1709	11525.6	10594.5	10395.4	9902.84	10790.5	11529.6	12887.3	14277.6	13780.2	14427.1	14415.8	9993.07	9079.74	10343.1	9821.44	7814.68	12380.7	14471.2	15652.9	14879.3	14350.2	9110.29	9612.05	6868.65	7985.92	8658.99		1.02789	0.58468	0.219892
8.34_358.0662m/z	L3	HMDB0062650 | HMDB0002305 | HMDB0000999	2-formamido-N(1)-(5-O-phosphonato-D-ribosyl)acetamidine | 5'-phosphoribosyl-a-N-formylglycineamidine | Phosphoribosylformylglycineamidine	3	Endogenous|Food	HMDB0062650|HMDB0002305|HMDB0000999	2-formamido-N(1)-(5-O-phosphonato-D-ribosyl)acetamidine|5'-phosphoribosyl-a-N-formylglycineamidine|Phosphoribosylformylglycineamidine	57.9|57.9|56.5	3	M+FA-H	C8H16N3O8P	49.8 | 49.8 | 49.5	1.7015	93.161		358.066	1	8.33883	0.1883	5081.37	4902.24	4868.74	4864.61	4606.03	4481.83	2000.52	2547.64	2488.47	2423.57	2064.94	4186.66	5306.5	5063.58	4292.16	5700.6	4476.12	4679.85	4265.5	4320.9	4153.98	6987.14	6497.97	7996.44	7407.54	6636.49		1.89988	2.29e-06	6.1e-06
1.56_201.0766m/z	L3	HMDB0033092 | HMDB0032232 | HMDB0031101	3-(1-Hydroxymethyl-1-propenyl)pentanedioic acid | 2,5-Dimethyl-4-ethoxy-3(2H)-furanone | 8-Hydroxy-5,6-octadienoic acid	3	Endogenous|Food	HMDB0033092|HMDB0032306|HMDB0032232|HMDB0031101	3-(1-Hydroxymethyl-1-propenyl)pentanedioic acid|Diethyl oxalpropionate|2,5-Dimethyl-4-ethoxy-3(2H)-furanone|8-Hydroxy-5,6-octadienoic acid	21.6|0|20.3|21.8	4	M-H | M+FA-H | M+FA-H	C9H14O5 | C8H12O3 | C8H12O3	42.7 | 42.6 | 43	-1.16054834967557 | -1.50262156104 | -1.50262156104	93.2273986527853 | 94.7661099243042 | 94.7661099243042		201.077	1	1.55937	0.275867	3600.91	3649.35	3764.34	3521.06	3675.11	3227.68	4359.69	4218.77	3508.28	4017.35	4203.64	3225.9	3144.49	3840.22	3163.15	3338.74	3950.56	4329.05	4207.01	3826.95	3824.31	3095.5	3544.04	3145.68	3336.92	3300.62		-1.00843	0.884819	0.298598
7.14_203.1035m/z	L3	HMDB0039948 | HMDB0029136 | HMDB0029052	3,4-Dihydroxy-2-hydroxymethyl-1-pyrrolidinepropanamide | Valyl-Serine | Serylvaline	3	Endogenous|Food	HMDB0039948|HMDB0033891|HMDB0029136|HMDB0029052	3,4-Dihydroxy-2-hydroxymethyl-1-pyrrolidinepropanamide|N6-Acetyl-5S-hydroxy-L-lysine|Valyl-Serine|Serylvaline	37.8|10|43.2|43.4	4	M-H	C8H16N2O4	45.4 | 46.4 | 46.5	-1.00222	90.257		203.104	1	7.14277	0.192683	16309.8	17649.9	17966	18428	18661.4	13975.6	7930.02	8011.38	8084.38	8071.6	7900.76	12712.5	14853	16033.8	12818.4	15578.2	16620.4	13152.4	13354.4	15742.5	14057.4	25635.3	20985.2	29243.1	26087.4	25085.3		1.82326	1.27e-06	3.81e-06
6.78_204.1109n	L3	HMDB0039948 | HMDB0029136 | HMDB0029052	3,4-Dihydroxy-2-hydroxymethyl-1-pyrrolidinepropanamide | Valyl-Serine | Serylvaline	3	Endogenous|Food	HMDB0039948|HMDB0033891|HMDB0029136|HMDB0029052	3,4-Dihydroxy-2-hydroxymethyl-1-pyrrolidinepropanamide|N6-Acetyl-5S-hydroxy-L-lysine|Valyl-Serine|Serylvaline	41.3|6.49|36.4|41	4	M-H2O-H, M-H	C8H16N2O4	47.4 | 46.4 | 47.3	-0.738833	96.5718	204.111	203.104	1	6.77847	0.38185	8197.55	9050.38	9136.1	9323.1	9754.08	7482.6	6251.32	6275.89	5855.22	6721.35	5195.21	4188.37	4631.63	4714.12	4161.18	4995.28	13085.1	12391.8	10625.4	12504	12307.6	18142.8	15215.2	18357.8	15546.6	15000		2.01043	1.56e-06	4.53e-06
2.32_452.2790m/z	L3	HMDB0061642 | HMDB0011503 | HMDB0011473	3-hydroxyhexadecanoyl carnitine | LysoPE(16:0/0:0) | LysoPE(0:0/16:0)	3	Endogenous|Food	HMDB0061642|HMDB0041085|HMDB0011503|HMDB0011473	3-hydroxyhexadecanoyl carnitine|Sambutoxin|LysoPE(16:0/0:0)|LysoPE(0:0/16:0)	67.4|7.13|70.4|69.8	4	M+K-2H | M-H | M-H	C23H45NO5 | C21H44NO7P | C21H44NO7P	51.8 | 52.7 | 52.5	1.51348718018583 | 1.64225675237178 | 1.64225675237178	93.242800251297 | 94.8251626678736 | 94.8251626678736		452.279	1	2.31692	0.67875	326775	334763	328546	331102	320798	323178	379987	395720	401203	366844	402333	408749	381204	293931	403331	345210	418557	55042.5	350051	447329	440676	480383	93085.3	278384	302239	406069		-1.13696	0.420101	0.16944
3.02_318.1004m/z	L3	HMDB0060957 | HMDB0060604 | HMDB0014830	8-hydroxymirtazapine | Salbutamol 4-O-sulfate | Phentolamine	3	Endogenous	HMDB0060957|HMDB0060955|HMDB0060604|HMDB0014830	8-hydroxymirtazapine|mirtazapine-N-oxide|Salbutamol 4-O-sulfate|Phentolamine	27.6|0|26.9|26.9	4	M+K-2H | M-H | M+K-2H	C17H19N3O | C13H21NO6S | C17H19N3O	42 | 41.5 | 41.8	-3.47506826901446 | -3.89060076141631 | -3.47506826901446	86.2977398135279 | 85.0948125455702 | 86.2977398135279		318.1	1	3.01808	0.19705	4482.14	5004.39	4767.68	4906.29	4996.49	4326.85	6052.7	5293.32	4424.1	6132.12	4977.84	5002.35	5262.6	5045.55	5556.28	5310.41	5698.59	6097.44	5867.46	4537.49	4517.76	3760.55	4366.96	4397.28	4341.48	5038.75		-1.00604	0.940159	0.312642
8.05_346.0561m/z	L3	HMDB0011617 | HMDB0003540 | HMDB0000045	Adenosine 2'-phosphate | 3'-AMP | Adenosine monophosphate	3	Endogenous	HMDB0000230|HMDB0059594|HMDB0011617|HMDB0003540|HMDB0001044|HMDB0000773|HMDB0000230|HMDB0000045	[IHL:N-ACETYLNEURAMINATE]|2-hydroxy-dAMP|Adenosine 2'-phosphate|3'-AMP|2'-Deoxyguanosine 5'-monophosphate|N-Acetyl-a-neuraminic acid|N-Acetylneuraminic acid|Adenosine monophosphate	0|22.7|59.3|59.3|30.7|35.1|35|59.4	8	M-H	C10H14N5O7P	49.4	0.808806643906099 | 0.808806644069883 | 0.808806644069883	88.5582		346.056	1	8.04543	0.516733	1.39943e+06	1.42758e+06	1.43565e+06	1.46812e+06	1.43685e+06	1.37883e+06	1.85897e+06	1.85487e+06	1.78672e+06	1.80066e+06	1.87405e+06	1.40706e+06	1.40883e+06	1.38483e+06	1.44004e+06	1.35565e+06	1.80126e+06	1.64956e+06	1.76994e+06	1.7973e+06	1.9077e+06	1.26646e+06	1.15535e+06	1.17667e+06	1.1257e+06	1.22156e+06		-1.02796	0.290155	0.126883
2.92_267.0602m/z	L3	HMDB0028754 | HMDB0011160 | HMDB0000497	Aspartyl-Hydroxyproline | L-alpha-Aspartyl-L-hydroxyproline | 5,6-Dihydrouridine	3	Endogenous	HMDB0028754|HMDB0011160|HMDB0000497	Aspartyl-Hydroxyproline|L-alpha-Aspartyl-L-hydroxyproline|5,6-Dihydrouridine	32.6|32.6|33	3	M+Na-2H	C9H14N2O6	45.2 | 45.2 | 45.3	1.48128520764714 | 1.48128520764714 | 1.48128520776264	95.1198		267.06	1	2.92173	0.1534	3100.56	2858.02	2803.41	2611.38	2722.02	2981.07	2016.18	2190.32	2324.84	2129.87	2061.85	3195.59	3466.92	3797.38	3061.38	3203.6	2500.04	2163.76	2354.54	2615.13	2491.77	3301.82	3031.15	3186.78	3320.49	2911.89		1.13076	0.0176179	0.0120287
8.92_491.1642m/z	L3	HMDB0028754 | HMDB0011160 | HMDB0000497	Aspartyl-Hydroxyproline | L-alpha-Aspartyl-L-hydroxyproline | 5,6-Dihydrouridine	3	Endogenous	HMDB0028754|HMDB0011160|HMDB0000497	Aspartyl-Hydroxyproline|L-alpha-Aspartyl-L-hydroxyproline|5,6-Dihydrouridine	49.8|49.8|49.8	3	2M-H	C9H14N2O6	48.2	2.23260361408644 | 2.23260361408644 | 2.23260361420194	93.6192		491.164	1	8.91712	0.188333	8573.49	9142.68	9327.32	9031.25	8766.34	7067.12	4670.95	4767.3	4386.73	5077.72	4477.07	10281.1	13327.6	13425.2	10759	13613.7	6693.25	4941.76	5182.04	6762.23	6047.52	11630.6	10324.8	13155.7	11927.6	10713.6		1.2672	0.0106837	0.0078505
5.66_226.1310m/z	L3	HMDB0060441 | HMDB0028702 | HMDB0028681	beta-Alanyl-L-arginine | Arginyl-Alanine | Alanyl-Arginine	3	Endogenous	HMDB0060441|HMDB0028702|HMDB0028681	beta-Alanyl-L-arginine|Arginyl-Alanine|Alanyl-Arginine	72.1|72.1|72.1	3	M-H2O-H	C9H19N5O3	52.1	0.084613	88.4631		226.131	1	5.66457	0.14895	1956.37	2045.33	2191.15	2001.07	2024.43	1947.49	2325.56	2424.38	2316.61	2402.84	2521.28	2533.01	2777.82	2400.08	2763.69	2681.9	1806.8	1664.52	1694.84	1713.37	1726.78	1793.88	1806.36	1978.18	1825.77	1960.34		-1.39324	2.26e-07	1.04e-06
5.18_310.1148m/z	L3	HMDB0038663 | HMDB0004824 | HMDB0001961	D-1-[(3-Carboxypropyl)amino]-1-deoxyfructose | N2,N2-Dimethylguanosine | 1,7-Dimethylguanosine	3	Endogenous|Food	HMDB0038663|HMDB0004824|HMDB0001961	D-1-[(3-Carboxypropyl)amino]-1-deoxyfructose|N2,N2-Dimethylguanosine|1,7-Dimethylguanosine	23.9|24|31.9	3	M+FA-H | M-H | M-H	C10H19NO7 | C12H17N5O5 | C12H17N5O5	43.8 | 42.9 | 44.5	1.70138345119157 | -2.84887261853906 | -2.84887261835636	96.9266874870908 | 93.9657063893978 | 93.9657063893978		310.115	1	5.17788	0.1445	6748.77	6749.09	6835.38	6906.24	7630.21	7832.09	7832.87	7445.85	7260.58	6236.1	7673.17	6468.17	5773.98	6343.4	4701.31	4312.65	3199.48	5162.03	5519.72	3988.89	4187.23	3157.55	6104.29	5350.48	8027.32	6707.97		-1.65245	0.00117058	0.00118635
9.30_302.1473m/z	L3	HMDB0029143 | HMDB0028813 | HMDB0028708	gamma-Glutamylarginine | Glutamylarginine | Arginyl-Glutamic acid	3	Endogenous	HMDB0029143|HMDB0028813|HMDB0028708	gamma-Glutamylarginine|Glutamylarginine|Arginyl-Glutamic acid	76.4|76.4|62.9	3	M-H	C11H21N5O5	52.2 | 52.2 | 49.5	1.12951601995401 | 1.12951601995401 | 1.12951601976651	86.039		302.147	1	9.30313	0.232333	13784.9	14466.9	14583.3	14710.9	14687.1	13879.1	8240.71	8965.67	9434.46	9569.22	7731.06	13804.7	16104.1	16759	13523.7	17379.5	16395	14905.5	14898.2	15710.4	14796.2	18701	17498.8	20002.2	18784.3	17927.3		1.74564	1.74e-06	4.89e-06
6.79_284.1368m/z	L3	HMDB0029143 | HMDB0028813 | HMDB0028708	gamma-Glutamylarginine | Glutamylarginine | Arginyl-Glutamic acid	3	Endogenous	HMDB0029143|HMDB0028813|HMDB0028708	gamma-Glutamylarginine|Glutamylarginine|Arginyl-Glutamic acid	47.1|53.9|53.9	3	M-H2O-H	C11H21N5O5	48 | 49.3 | 49.3	1.34422608307115 | 1.34422608307115 | 1.34422608288365	94.3869		284.137	1	6.7916	0.179817	4963.82	5040.19	5054.06	5185.67	5330.86	4903.41	3500.59	3526.91	3703.11	3731.51	3558.14	5805.76	6721.45	6558.52	6119.95	6559.4	4223.58	3891.14	3726.72	4210.69	3927.19	6176.05	5771.44	6537.69	6070.63	6108.42		1.10871	0.00582048	0.00467823
7.42_284.1368m/z	L3	HMDB0029143 | HMDB0028813 | HMDB0028708	gamma-Glutamylarginine | Glutamylarginine | Arginyl-Glutamic acid	3	Endogenous	HMDB0029143|HMDB0028813|HMDB0028708	gamma-Glutamylarginine|Glutamylarginine|Arginyl-Glutamic acid	50|50|46.3	3	M-H2O-H	C11H21N5O5	48.6 | 48.6 | 47.9	1.19009614227197 | 1.19009614227197 | 1.19009614208446	94.5839		284.137	1	7.42355	0.179533	6727.92	6981.4	6902.86	7025.21	7168.92	6573.9	5122.87	5147.68	5428.39	5638.84	5211.97	8745.91	9815.45	9488.54	8901.54	9529.2	5088.69	5191.59	5080.36	5289.05	5028.74	7545.94	7377.93	8164.74	7708.73	7808.4		-1.03393	0.14585	0.0722244
7.48_265.0945m/z	L3	HMDB0029151 | HMDB0028884 | HMDB0028821	gamma-Glutamylhistidine | Histidinyl-Glutamate | Glutamylhistidine	3	Endogenous	HMDB0060724|HMDB0029151|HMDB0028884|HMDB0028821	2,4-Diamino-6,7-dimethoxyquinazoline|gamma-Glutamylhistidine|Histidinyl-Glutamate|Glutamylhistidine	22.4|59.8|49.3|60	4	M-H2O-H	C11H16N4O5	50.6 | 48.5 | 50.6	0.905228730183116 | 0.90522873038319 | 0.905228730183116	94.2488		265.094	1	7.48485	0.205817	10351.3	10498.2	10497.5	10970.5	11364.7	9860.56	6781.35	6580.29	6987.19	7823.69	6141.4	14307.1	17229.1	17212.4	13656	15877.3	9490.61	6948.81	8060.57	9300.45	9018.17	16645.8	11352.5	10675	9809.44	15270.4		1.24785	0.0146089	0.0102107
6.54_215.0673m/z	L3	HMDB0029158 | HMDB0029038 | HMDB0028828	gamma-Glutamylserine | Serylglutamic acid | Glutamylserine	3	Endogenous	HMDB0029158|HMDB0029057|HMDB0029038|HMDB0028828|HMDB0028763|HMDB0011169	gamma-Glutamylserine|Threoninyl-Aspartate|Serylglutamic acid|Glutamylserine|Aspartyl-Threonine|L-beta-aspartyl-L-threonine	39.2|12.1|38.7|39.2|14.7|14.6	6	M-H2O-H	C8H14N2O6	45.7 | 45.6 | 45.7	-0.232999	89.6774		215.067	1	6.53718	0.26325	5973.61	6089.06	6147.24	6017.17	5915.61	6340.48	2929.73	3043.37	3875.27	3326.55	3384.91	7109.9	8967.19	9979.14	8132.39	9917.85	4209.39	3885.24	3905.4	4443.35	3843.02	8520.83	7904.68	10295.6	9110.87	7606		1.22504	0.00631333	0.0049982
4.63_215.0673m/z	L3	HMDB0029158 | HMDB0029038 | HMDB0028828	gamma-Glutamylserine | Serylglutamic acid | Glutamylserine	3	Endogenous	HMDB0029158|HMDB0029057|HMDB0029038|HMDB0028828|HMDB0028763|HMDB0011169	gamma-Glutamylserine|Threoninyl-Aspartate|Serylglutamic acid|Glutamylserine|Aspartyl-Threonine|L-beta-aspartyl-L-threonine	34.7|12.6|35.3|34.8|14|13.8	6	M-H2O-H	C8H14N2O6	46.1 | 46.2 | 46.1	-0.358078	96.3033		215.067	1	4.63035	0.214567	9738.46	10734.5	10444.3	10319.9	10544.3	8685.42	5407.75	5595.83	5608.19	5917.72	5499.98	12881.6	15397.1	15411.1	13763.8	16213.1	7955.32	7149.32	7137.24	7945.27	6939.73	13727.9	12076.1	15228.4	14066	13258.3		1.32457	2.73e-05	4.64e-05
1.22_473.2834m/z	L3	HMDB0035983 | HMDB0030395 | HMDB0004649	Ganoderal A | Manglupenone | Demethylphylloquinone	3	Endogenous|Food	HMDB0035983|HMDB0030395|HMDB0004649	Ganoderal A|Manglupenone|Demethylphylloquinone	33.9|44|33.9	3	M+K-2H	C30H44O2	44.9 | 47 | 44.9	1.41371738741149 | 1.41371738741149 | 1.41371738754176	92.4602		473.283	1	1.2178	0.1797	33644.7	33817.3	33297.6	32852.2	31208.7	26645.4	41134.2	41181.9	32205.8	38166.4	38951.9	30415.1	27357.9	43220.4	28555.4	27583.4	29991.5	54448.2	39606.1	41974.1	33687	29000.4	51682.2	42832.5	51616.2	28121.9		1.04209	0.834697	0.286507
9.52_301.1633m/z	L3	HMDB0028791 | HMDB0028723 | HMDB0028707	Glutaminylarginine | Arginyl-Gamma-glutamate | Arginyl-Glutamine	3	Endogenous	HMDB0028791|HMDB0028723|HMDB0028707	Glutaminylarginine|Arginyl-Gamma-glutamate|Arginyl-Glutamine	49.1|51.6|51.6	3	M-H	C11H22N6O4	46.8 | 47.3 | 47.3	1.07910007566979 | 1.07910007566979 | 1.07910007548167	85.9997		301.163	1	9.52232	0.250383	8762.9	8779.08	9244.49	9372.71	9233.29	8803.27	2370.44	2831.35	3044.1	2972.63	1697.36	5138.26	6432.27	6904.33	4452.71	7169.15	13444.7	13316.4	12059.2	12474.5	11397	15932.3	14693.3	19031	17344.2	15816.6		4.85386	6.04e-07	2.14e-06
6.93_283.1528m/z	L3	HMDB0028791 | HMDB0028723 | HMDB0028707	Glutaminylarginine | Arginyl-Gamma-glutamate | Arginyl-Glutamine	3	Endogenous	HMDB0032297|HMDB0028791|HMDB0028723|HMDB0028707	Glyceryl 5-hydroxydecanoate|Glutaminylarginine|Arginyl-Gamma-glutamate|Arginyl-Glutamine	3.76|51.2|37.6|51.2	4	M-H2O-H	C11H22N6O4	47.1 | 44.4 | 47.1	1.31084293051536 | 1.31084293051536 | 1.31084293032724	85.9762		283.153	1	6.92762	0.215417	6062.65	6175.53	6179.9	5877.19	6030.82	5816.94	4832.92	5235.38	5264.5	5160.51	5290.98	7149.61	7381.66	7359.04	7483.6	7251.26	5358.76	5352.09	5465	5444.67	5422.14	5976.87	5927.72	5873.8	5715.07	6222.22		1.0488	0.0228577	0.0149737
8.68_259.1051m/z	L3	HMDB0028792 | HMDB0028745 | HMDB0028729	Glutaminylasparagine | Asparaginyl-Gamma-glutamate | Asparaginyl-Glutamine	3	Endogenous	HMDB0028792|HMDB0028745|HMDB0028729	Glutaminylasparagine|Asparaginyl-Gamma-glutamate|Asparaginyl-Glutamine	45|46|46.4	3	M-H	C9H16N4O5	47.7 | 47.9 | 48	0.987676574801979 | 0.987676575020514 | 0.987676575020514	94.6744		259.105	1	8.68477	0.21895	5274.18	5323.08	5398.85	5148.5	5108.64	4931.09	2318.01	2502.41	2576.66	2556.4	2085.72	3345.54	3850.72	3774.4	3231.66	3757	6116.36	7472.73	5948.35	6418.4	5890.07	7744.11	7818.58	9970.64	8433.94	7946.49		2.64518	1.86e-07	8.97e-07
4.85_170.0567m/z	L3	HMDB0029419 | HMDB0028836 | HMDB0028731	Glycylglycylglycine | Glycyl-Asparagine | Asparaginyl-Glycine	3	Endogenous|Food	HMDB0029419|HMDB0028836|HMDB0028731|HMDB0015052|HMDB0011601|HMDB0004339|HMDB0002894	Glycylglycylglycine|Glycyl-Asparagine|Asparaginyl-Glycine|Metronidazole|3-Methylcytosine|2-O-Methylcytosine|5-Methylcytosine	47.3|48.4|46.9|26.2|24.6|14.7|29.4	7	M-H2O-H	C6H11N3O4	47.8 | 48.1 | 47.8	-2.24023	94.6058		170.057	1	4.8493	0.175317	1747.61	1771.82	1896.25	1725.43	1729.64	1672.26	1267.43	1309.95	1291.53	1358.65	1307.09	1924.95	2274.91	2217.7	2065.11	2181.07	1502.48	1400.79	1329.98	1544.79	1374.85	2222.9	1933.79	2262.89	2141.29	1876.1		1.09461	0.0183854	0.0124494
5.55_207.0886m/z	L3	HMDB0028878 | HMDB0028689 | HMDB0000033	Histidinyl-Alanine | Alanyl-Histidine | Carnosine	3	Endogenous|Food	HMDB0033532|HMDB0028878|HMDB0028689|HMDB0000033	Dimethicone|Histidinyl-Alanine|Alanyl-Histidine|Carnosine	0|29.4|28.6|28.6	4	M-H2O-H	C9H14N4O3	44.7 | 44.6 | 44.6	-0.828545	95.2887		207.089	1	5.55488	0.17975	1875.82	2053.81	2008.8	2093.94	2066.12	1722.5	1090.7	1066.92	1018.38	1212.15	802.987	1470.71	1878	2799.78	1222.58	1384.26	2648.21	2701.43	2390.98	2865.58	2573.59	3063.07	2897.14	3035.77	2755.48	2244.58		2.5389	1.46e-06	4.29e-06
6.80_264.1105m/z	L3	HMDB0028899 | HMDB0028883 | HMDB0028799	Histidinyl-Gamma-glutamate | Histidinyl-Glutamine | Glutaminylhistidine	3	Endogenous	HMDB0028899|HMDB0028883|HMDB0028799|HMDB0012204	Histidinyl-Gamma-glutamate|Histidinyl-Glutamine|Glutaminylhistidine|Cis-zeatin	54.6|69.6|67.6|15.3	4	M-H2O-H	C11H17N5O4	48 | 51 | 50.6	1.17219	86.9645		264.111	1	6.80473	0.219617	30044.6	30023.8	30046.6	28404.7	28769.2	26302.9	13444	13957.5	12817.7	14856.5	12026.5	23753.9	29961.5	39160.8	21932.1	21500.3	32823	34417.3	31128	37177.8	32421.4	42664.6	40388.8	39705.8	36647.9	33546.6		2.50316	5.01e-08	3.3e-07
9.18_282.1212m/z	L3	HMDB0028899 | HMDB0028883 | HMDB0028799	Histidinyl-Gamma-glutamate | Histidinyl-Glutamine | Glutaminylhistidine	3	Endogenous	HMDB0061150|HMDB0028899|HMDB0028883|HMDB0028799	Hydroxyl frovatriptan|Histidinyl-Gamma-glutamate|Histidinyl-Glutamine|Glutaminylhistidine	18.5|52.7|52.1|45.9	4	M-H	C11H17N5O4	47.5 | 47.4 | 46.1	1.3203	86.32		282.121	1	9.1849	0.24105	5001.19	5209.41	5075.05	5007.05	4782.62	4603.31	1329.02	1372.42	1495.38	1456.67	788.182	1429.37	2000.53	3227.57	1136.57	1850.09	9906.71	15427.9	10411.5	12252.8	9342.1	7836.61	10259	11363.1	9851.87	7130.7		8.90157	4.45e-07	1.65e-06
6.68_175.0840n	L3	HMDB0094717 | HMDB0034252 | HMDB0002201	hydroxyvalerylglycine | 2-Aminoheptanedioic acid | N-Carboxyethyl-g-aminobutyric acid	3	Endogenous|Food	HMDB0094717|HMDB0038594|HMDB0036383|HMDB0034252|HMDB0002201	hydroxyvalerylglycine|Calystegine B2|Calystegine B5|2-Aminoheptanedioic acid|N-Carboxyethyl-g-aminobutyric acid	38.3|4.29|4.87|40|39.9	5	M-H, M+Na-2H, M-H2O-H	C7H13NO4	45.4 | 45.8 | 45.8	-2.60074552838355 | -2.60074552838355 | -2.60074552822122	91.9216	175.084	174.077	1	6.68212	0.307233	141778	154046	148835	142131	142712	116820	251228	252761	234146	242677	269070	169937	167004	168391	174737	154472	193598	27612.3	211590	157644	174841	85591.5	19661.5	22080.7	31367.1	71592.4		-1.63322	0.10988	0.0566807
9.70_259.1414m/z	L3	HMDB0029396 | HMDB0028946 | HMDB0028736	L-cis-3-Amino-2-pyrrolidinecarboxylic acid | Lysyl-Asparagine | Asparaginyl-Lysine	3	Endogenous|Food	HMDB0030405|HMDB0029396|HMDB0028946|HMDB0028736	D-1-Amino-2-pyrrolidinecarboxylic acid|L-cis-3-Amino-2-pyrrolidinecarboxylic acid|Lysyl-Asparagine|Asparaginyl-Lysine	39.7|43.1|54.2|54.9	4	2M-H | M-H | M-H	C5H10N2O2 | C10H20N4O4 | C10H20N4O4	47.9 | 49.5 | 49.7	1.02434	97.6005961778044 | 94.7628348635234 | 94.7628348635234		259.141	1	9.70262	0.215333	4368.12	4542.48	4457.51	4657.87	4689.34	4555.68	1722.84	1653.85	2070.05	2022.23	1675.82	4098.09	4644.91	4662.09	4059.07	4827.13	5897.22	6018.32	5093.49	5675.36	5151.64	7428.1	7010.21	8205.91	7444.64	7003.49		3.04392	6.59e-08	3.98e-07
7.96_175.0719m/z	L3	HMDB0029396 | HMDB0029061 | HMDB0028851	L-cis-3-Amino-2-pyrrolidinecarboxylic acid | Threoninyl-Glycine | Glycyl-Threonine	3	Endogenous|Food	HMDB0030405|HMDB0029396|HMDB0029061|HMDB0029032|HMDB0028851|HMDB0028696	D-1-Amino-2-pyrrolidinecarboxylic acid|L-cis-3-Amino-2-pyrrolidinecarboxylic acid|Threoninyl-Glycine|Serylalanine|Glycyl-Threonine|Alanyl-Serine	4.22|23.6|27.5|7.58|26.1|11	6	M+FA-H | M-H | M-H	C5H10N2O2 | C6H12N2O4 | C6H12N2O4	42.5 | 43.3 | 43	-3.90944973148286 | -2.88800977179872 | -2.88800977179872	93.6243557364302 | 92.1864188764109 | 92.1864188764109		175.072	1	7.95785	0.201433	4729.83	4766.34	4957.73	5030.74	5292.66	5658.29	2100.18	2103.69	2252.99	2347.77	1977.36	3718.43	4304.94	3061.66	3677.34	4415.86	16412	6575.08	13157.8	9231.78	13605.1	12322.4	4547.78	5706.72	5551.37	11053.1		5.4704	8.67e-06	1.81e-05
7.64_403.1839m/z	L3	HMDB0034266 | HMDB0030452 | HMDB0028856	L-Coprine | Blasticidin S | Hydroxyprolyl-Alanine	3	Endogenous|Food	HMDB0034266|HMDB0030452|HMDB0029047|HMDB0029026|HMDB0028856|HMDB0028688	L-Coprine|Blasticidin S|Serylproline|Prolyl-Serine|Hydroxyprolyl-Alanine|Alanyl-Hydroxyproline	30.5|35|2.28|10.1|32.3|2.26	6	2M-H | M-H2O-H | 2M-H	C8H14N2O4 | C17H26N8O5 | C8H14N2O4	44.7 | 44.9 | 45.1	1.21414973896622 | -2.00534127018005 | 1.21414973910686	94.4687843659446 | 91.6674764518719 | 94.4687843659446		403.184	1	7.64248	0.162017	15806.8	15229.4	14619.6	14481.9	14659.1	13329	13618.9	15326.6	14532.2	15418.9	15802	21487.5	22830.9	22407.7	22533.4	21867.4	8761.23	8982.64	7602.88	9393.66	8922.64	17495.8	14580.9	12230.3	10596.7	13216.6		-1.7108	2.08e-06	5.58e-06
9.56_273.1573m/z	L3	HMDB0028965 | HMDB0028949 | HMDB0028802	Lysyl-Gamma-glutamate | Lysyl-Glutamine | Glutaminyllysine	3	Endogenous	HMDB0028965|HMDB0028949|HMDB0028802	Lysyl-Gamma-glutamate|Lysyl-Glutamine|Glutaminyllysine	32.4|32.4|31.5	3	M-H	C11H22N4O4	45.1 | 45.1 | 45	1.68102	95.3216		273.157	1	9.55735	0.237233	6858.33	6932.15	6983.65	7103.93	7156.96	6730.54	4025.5	3984.15	4545.89	4545.4	3846.72	7662.72	8490.57	8488.06	7965.85	9067.06	7308.37	7871.79	6694.76	7022.88	6970.41	8454.6	8506.38	9788.31	9027.25	8518.06		1.71228	2.02e-06	5.52e-06
8.74_203.1036m/z	L3	HMDB0033891 | HMDB0029136 | HMDB0029052	N6-Acetyl-5S-hydroxy-L-lysine | Valyl-Serine | Serylvaline	3	Endogenous|Food	HMDB0039948|HMDB0033891|HMDB0029136|HMDB0029052	3,4-Dihydroxy-2-hydroxymethyl-1-pyrrolidinepropanamide|N6-Acetyl-5S-hydroxy-L-lysine|Valyl-Serine|Serylvaline	2.82|54.9|54.9|54.9	4	M-H	C8H16N2O4	49.8	-0.76138	94.9602		203.104	1	8.7417	0.236717	1931.14	2025.91	2010.78	2065.32	2064.32	2005.67	4958.27	4932.8	4168.77	5189.55	3692.34	1916.28	2250.28	1399.15	1827.59	2355.85	809.347	251.319	857.561	1958.92	973.722	2301.58	124.422	95.0441	151.632	1022.08		-4.72941	0.000870945	0.000914063
7.87_278.0884m/z	L3	HMDB0015401 | HMDB0005862 | HMDB0001563	Nelarabine | 2-Methylguanosine | 1-Methylguanosine	3	Endogenous	HMDB0035923|HMDB0015401|HMDB0006038|HMDB0005862|HMDB0001563	Hirsutin|Nelarabine|3'-O-Methylguanosine|2-Methylguanosine|1-Methylguanosine	11.8|51.6|36.5|57.5|51.7	5	M-H2O-H	C11H15N5O5	48.2 | 49.4 | 48.2	-3.7082946349573 | -3.7082946349573 | -3.70829463514862	93.747		278.088	1	7.87465	0.3504	13793.9	14183.9	14292.8	14365.7	14610.2	13456.1	29324.1	27372.3	27411.7	28681.6	30554	25520.5	25281	2693.03	25893	21980.2	24638.6	64.8208	7821.81	6869.7	27457	34998.5	178.806	168.296	84.2676	14793.3		-2.1442	0.143021	0.0709346
4.81_317.0211m/z	L3	HMDB0033743 | HMDB0031969 | HMDB0012491	Neodunol | 3-Hydroxy-2-(4-methylbenzoyl)-4H-1-benzopyran-4-one | 1,4-Benzothiazine-O-quinonimine	3	Endogenous|Food	HMDB0125117|HMDB0033743|HMDB0031969|HMDB0031863|HMDB0012491	3,5,7-trihydroxy-2-(4-hydroxy-3-methoxyphenyl)-1Î»â´-chromen-1-ylium|Neodunol|3-Hydroxy-2-(4-methylbenzoyl)-4H-1-benzopyran-4-one|gamma-Glutamyl-S-methylcysteine sulfoxide|1,4-Benzothiazine-O-quinonimine	0|39.9|38.5|10.9|43.6	5	M+K-2H | M+K-2H | M+Na-2H	C17H12O4 | C17H12O4 | C12H12N2O5S	45 | 44.7 | 46.3	-3.74746190608365 | -3.74746190608365 | -0.830254682580302	89.4677312593231 | 89.4677312593231 | 88.7521201917154		317.021	1	4.80552	0.280417	17559.4	17354.5	17442.2	15840.4	14722.6	15894.8	9625.8	10452.9	10209.3	10689.4	11680.4	16855.5	17245	17582.2	17367.6	16500.4	16385.1	13541.4	15624.9	17264.6	15576.7	16932.1	16382.6	19427.5	16281.9	15422.8		1.48872	5.61e-05	8.67e-05
5.10_317.0211m/z	L3	HMDB0033743 | HMDB0031969 | HMDB0012491	Neodunol | 3-Hydroxy-2-(4-methylbenzoyl)-4H-1-benzopyran-4-one | 1,4-Benzothiazine-O-quinonimine	3	Endogenous|Food	HMDB0125117|HMDB0033743|HMDB0031969|HMDB0031863|HMDB0012491	3,5,7-trihydroxy-2-(4-hydroxy-3-methoxyphenyl)-1Î»â´-chromen-1-ylium|Neodunol|3-Hydroxy-2-(4-methylbenzoyl)-4H-1-benzopyran-4-one|gamma-Glutamyl-S-methylcysteine sulfoxide|1,4-Benzothiazine-O-quinonimine	0|31.2|34.1|4.01|33.9	5	M+K-2H | M+K-2H | M+Na-2H	C17H12O4 | C17H12O4 | C12H12N2O5S	42.8 | 43.4 | 43.9	-3.81515837813013 | -3.81515837813013 | -0.894298606492844	87.1703601001662 | 87.1703601001662 | 86.4731246435722		317.021	1	5.10345	0.201433	2816.48	2978.21	3037.09	3262.42	3204.97	3495.05	2806.48	3245.14	2797.06	3079.18	3355.18	6140.24	7148.58	6986.19	6497.18	6744.55	2616.98	2437.84	2593.72	2178.58	2585.36	2945.68	2487.33	2297.41	2125.71	2557.36		-1.23126	0.00341399	0.00296001
4.77_146.0453m/z	L3	HMDB0062183 | HMDB0003011 | HMDB0002931	N-lactoyl-Glycine | O-Acetylserine | N-Acetylserine	3	Endogenous|Food	HMDB0062183|HMDB0060475|HMDB0033550|HMDB0006556|HMDB0003339|HMDB0003011|HMDB0002931|HMDB0002393|HMDB0000148	N-lactoyl-Glycine|DL-Glutamate|3-(Carboxymethylamino)propanoic acid|L-4-Hydroxyglutamate semialdehyde|D-Glutamic acid|O-Acetylserine|N-Acetylserine|N-Methyl-D-aspartic acid|L-Glutamic acid	24.3|7.65|6.91|7.65|7.65|20.3|20.2|5.33|7.65	9	M-H	C5H9NO4	42.1 | 41.3 | 41.3	-3.96297434645123 | -3.9629743466445 | -3.9629743466445	90.7863		146.045	1	4.77048	0.41615	9633.93	10359.5	10289.9	10520.1	10414.7	8486.15	7480.72	7299.04	6903.73	7877.2	8922.95	11807.5	13073.1	10562.7	13534.3	15867.9	9008.77	6108.08	7828.24	9832.26	8599.19	13806	9425.35	9268.6	9696.12	13493.4		1.07517	0.510407	0.197823
1.88_202.1083m/z	L3	HMDB0062176 | HMDB0033433 | HMDB0014447	N-lactoyl-Leucine | (S)-Homostachydrine | Tranexamic Acid	3	Food	HMDB0245646|HMDB0062176|HMDB0033433|HMDB0014447|HMDB0000201	[IHL:N6-(DELTA2-ISOPENTENYL)-ADENINE]|N-lactoyl-Leucine|(S)-Homostachydrine|Tranexamic Acid|L-Acetylcarnitine	1.71|47.1|48.5|52.8|21.9	5	M-H | M+FA-H | M+FA-H	C9H17NO4 | C8H15NO2 | C8H15NO2	48.7 | 49.2 | 50.1	-1.07010690503828 | -1.38345063691816 | -1.38345063691816	97.7077589369019 | 99.2189977560558 | 99.2189977560558		202.108	1	1.87902	0.205817	19216	19424.6	18945.4	18946.7	19090.4	17700	6517.59	6342.6	6903.28	6756.1	6187.41	6906.92	7805.02	7697.65	6893.41	7189.95	36081.7	48432.6	32465.7	35812.2	29345.6	28401.3	28908.2	31665.3	31912.6	29197.9		5.56878	4.46e-08	3.14e-07
8.20_161.0563m/z	L3	HMDB0061163 | HMDB0029039 | HMDB0028850	N-Nitroso-3-hydroxypyrrolidine | Serylglycine | Glycyl-Serine	3	Endogenous	HMDB0061163|HMDB0060496|HMDB0029424|HMDB0029039|HMDB0028850	N-Nitroso-3-hydroxypyrrolidine|N,N'-Diacetylhydrazine|L-4-Hydroxyglutamine|Serylglycine|Glycyl-Serine	54.9|1.33|6.95|59.4|52.1	5	M+FA-H | M-H | M-H	C4H8N2O2 | C5H10N2O4 | C5H10N2O4	49.4 | 50.3 | 48.9	-4.54605662879251 | -3.25556533627226 | -3.25556533627226	97.5109548827453 | 96.0087741673473 | 96.0087741673473		161.056	1	8.20308	0.183917	3302.48	3389.53	3410.98	3270.79	3197.6	3201.48	6010.91	6364.53	6150.93	5853.78	5888.47	3003.83	2750.95	2911.92	2630.89	2474.86	3843.66	2457.13	3368.51	2983.73	3210.45	2360.05	1983.34	2135.8	2371	2492.48		-1.90807	2.37e-05	4.14e-05
1.44_719.4893m/z	L3	HMDB0114877 | HMDB0010585 | HMDB0010571	PA(18:0/16:1(9Z)) | PG(16:1(9Z)/16:0) | PG(16:0/16:1(9Z))	3	Endogenous|Food	HMDB0115091|HMDB0115062|HMDB0114924|HMDB0114899|HMDB0114877|HMDB0031130|HMDB0010585|HMDB0010571|HMDB0007859|HMDB0007858	PA(20:1(11Z)/14:0)|PA(20:0/14:1(9Z))|PA(18:1(9Z)/16:0)|PA(18:1(11Z)/16:0)|PA(18:0/16:1(9Z))|9-Octadecenoic acid 1-[[(1-oxohexadecyl)oxy]methyl]-2-(phosphonoxy)ethyl ester|PG(16:1(9Z)/16:0)|PG(16:0/16:1(9Z))|PA(16:0/18:1(9Z))|PA(16:0/18:1(11Z))	50.2|20.8|62.1|62.1|80.2|62.1|70.2|70.2|62.1|62.1	10	M+FA-H | M-H | M-H	C37H71O8P | C38H73O10P | C38H73O10P	53.5 | 51.5 | 51.5	3.56908014895138 | 3.341183078018 | 3.34118307817579	91.6865247224863 | 91.3735250570977 | 91.3735250570977		719.489	1	1.43675	0.455417	843487	794845	787570	803384	805857	831433	840495	871030	879135	800403	812085	903401	865794	967544	856392	788681	761813	617218	689032	680423	818324	1.17159e+06	1.01632e+06	860602	846354	943957		-1.17841	0.0120867	0.00868404
1.78_686.4789m/z	L3	HMDB0113963 | HMDB0113844 | HMDB0008957	PE-NMe2(16:1(9Z)/14:1(9Z)) | PE-NMe2(14:1(9Z)/16:1(9Z)) | PE(16:1(9Z)/16:1(9Z))	3	Endogenous|Food	HMDB0113963|HMDB0113844|HMDB0009085|HMDB0009053|HMDB0009020|HMDB0008957|HMDB0008861|HMDB0008860|HMDB0008829	PE-NMe2(16:1(9Z)/14:1(9Z))|PE-NMe2(14:1(9Z)/16:1(9Z))|PE(18:2(9Z,12Z)/14:0)|PE(18:1(9Z)/14:1(9Z))|PE(18:1(11Z)/14:1(9Z))|PE(16:1(9Z)/16:1(9Z))|PE(14:1(9Z)/18:1(9Z))|PE(14:1(9Z)/18:1(11Z))|PE(14:0/18:2(9Z,12Z))	48.2|48.2|0.3|2.06|2.06|48.5|2.06|2.06|0.3	9	M-H	C37H70NO8P	47.1	3.27758	91.0647		686.479	1	1.78268	0.306517	104245	92363.3	90486.1	94692.8	93200	95861.3	60799.5	66131.6	66602.3	64236.5	59912.6	121738	120628	108279	114394	103880	114294	57496.7	81724.9	52660.2	126392	234526	80297.8	68472.2	62701.1	186955		1.36163	0.198233	0.0930609
4.77_279.1102m/z	L3	HMDB0004988 | HMDB0002820 | HMDB0002271	Pi-Methylimidazoleacetic acid | Methylimidazoleacetic acid | Imidazolepropionic acid	3	Endogenous	HMDB0004988|HMDB0002820|HMDB0002271|HMDB0002144	Pi-Methylimidazoleacetic acid|Methylimidazoleacetic acid|Imidazolepropionic acid|1,3-Dimethyluracil	21.9|21.8|21.8|0	4	2M-H	C6H8N2O2	43.5	1.02449980939948 | 1.02449980939948 | 1.02449980919656	97.0829		279.11	1	4.77048	0.403017	10301.4	10298	10432.2	10380	10441.6	10145.6	5263.08	5371.48	5221.75	6230.4	4349.64	8078.49	10410.2	15101.2	7189.19	7648.76	11771.6	9277.13	9946.77	12150.4	11117.3	15916.1	15364.9	15598.7	15919.8	13520.2		2.0526	1.34e-05	2.6e-05
1.23_239.0598m/z	L3	HMDB0033071 | HMDB0032756 | HMDB0029835	Propyl 1-(propylsulfinyl)propyl disulfide | N-Methyl-1H-indole-3-propanamide | Tetrahydroharmol	3	Endogenous|Food	HMDB0033071|HMDB0032756|HMDB0029835|HMDB0028882|HMDB0028777	Propyl 1-(propylsulfinyl)propyl disulfide|N-Methyl-1H-indole-3-propanamide|Tetrahydroharmol|Histidinyl-Cysteine|Cysteinyl-Histidine	52.2|51.8|54|1.04|3.28	5	M-H | M+K-2H | M+K-2H	C9H20OS3 | C12H14N2O | C12H14N2O	48.3 | 48.2 | 48.6	-2.41831050828538 | 2.73599067106337 | 2.73599067092275	92.3678269142997 | 92.1859422799215 | 92.1859422799215		239.06	1	1.22655	0.788367	197733	222743	221324	264448	277245	275240	7588.91	7291.57	63244.8	4240.18	3106.17	6584.29	6288.84	6105.82	4492.78	6347.82	6865.15	3033.15	6599.38	7712.86	5821.42	2825.71	5114.1	6055.45	4494.38	35784.9		-2.84602	0.487462	0.190551
9.17_290.0408n	L3	HMDB0062754 | HMDB0060509 | HMDB0001068	Sedoheptulose 7-phosphate(2-) | Sedoheptulose 1-phosphate | D-Sedoheptulose 7-phosphate	3	Endogenous|Food	HMDB0062754|HMDB0060509|HMDB0001068	Sedoheptulose 7-phosphate(2-)|Sedoheptulose 1-phosphate|D-Sedoheptulose 7-phosphate	47|50|49.1	3	M-H, 2M-H	C7H15O10P	48.7 | 49.3 | 49.1	1.63103	98.4913	290.041	289.033	1	9.17155	0.741367	181379	189093	190277	193877	195029	183135	293145	248487	239844	276944	281204	212807	197272	196439	202576	197286	152878	316863	158002	178556	165316	106296	153406	170625	187935	173146		-1.37876	0.0336967	0.0208995
8.47_326.9891m/z	L3	HMDB0062754 | HMDB0060509 | HMDB0001068	Sedoheptulose 7-phosphate(2-) | Sedoheptulose 1-phosphate | D-Sedoheptulose 7-phosphate	3	Endogenous|Food	HMDB0062754|HMDB0060509|HMDB0001068	Sedoheptulose 7-phosphate(2-)|Sedoheptulose 1-phosphate|D-Sedoheptulose 7-phosphate	44|47.7|44.8	3	M+K-2H	C7H15O10P	47 | 47.7 | 47.1	0.833325	91.8651		326.989	1	8.46582	0.328417	11482.3	11890.6	11497.6	12039.3	12393.6	11988.3	19246.6	19845.6	19337.7	18915.7	19634	13642.8	11951.9	9664.92	14784.5	13740.1	7241.42	9311.7	10089.7	8905.7	6876.23	6118.93	8210.37	7732.63	8820.73	9150.93		-2.28592	3.53e-06	8.62e-06
8.63_232.0939m/z	L3	HMDB0029053 | HMDB0029037 | HMDB0028806	Serinyl-Gamma-glutamate | Serylglutamine | Glutaminylserine	3	Endogenous	HMDB0029056|HMDB0029053|HMDB0029037|HMDB0028806|HMDB0028741	Threoninyl-Asparagine|Serinyl-Gamma-glutamate|Serylglutamine|Glutaminylserine|Asparaginyl-Threonine	13.3|41|40.8|36.2|14.4	5	M-H	C8H15N3O5	46.1 | 46.1 | 45.2	0.0808433730304666 | 0.0808433730304666 | 0.0808433729085379	89.7042		232.094	1	8.62785	0.267117	19800.8	20016	19574.1	18765.6	18193	17562.7	18443.1	20676.8	18744.6	19071.9	15047.8	8381.67	8997.13	9873.14	7867.49	8764.99	25075	31597	24820.9	28538	25639	27051.3	23075.1	27503.8	24198.2	22607.6		1.47493	0.000541111	0.000617554
8.63_191.0671m/z	L3	HMDB0029048 | HMDB0006899 | HMDB0002031	Serylserine | Alanylglycine | Ureidoisobutyric acid	3	Endogenous|Food	HMDB0029048|HMDB0006899|HMDB0003423|HMDB0002031|HMDB0000641	Serylserine|Alanylglycine|D-Glutamine|Ureidoisobutyric acid|L-Glutamine	22.5|18.2|6.36|16.7|6.36	5	M-H | M+FA-H | M+FA-H	C6H12N2O5 | C5H10N2O3 | C5H10N2O3	43.3 | 42.7 | 42.4	-1.37269985960499 | -1.80503247972333 | -1.80503247972333	95.9006746186525 | 97.3935153738588 | 97.3935153738588		191.067	1	8.62785	0.223317	3735.79	3859.08	3748.31	3345.78	3290.83	3032.39	2838.99	3342.98	2955.11	3076.1	2429.15	1563.99	1590.88	1855.32	1409.71	1487.65	5281.33	6409.2	4996.92	6502.06	5648.09	5477	4445.49	4923.54	4318.28	3935.06		1.96947	1.65e-05	3.04e-05
8.26_246.1097m/z	L3	HMDB0029075 | HMDB0029059 | HMDB0028807	Threoninyl-Gamma-glutamate | Threoninyl-Glutamine | Glutaminylthreonine	3	Endogenous	HMDB0240212|HMDB0029075|HMDB0029059|HMDB0028807	(alpha-keto-dimethyl-delta-N,N-Dimethylguanidynol) valeric acid|Threoninyl-Gamma-glutamate|Threoninyl-Glutamine|Glutaminylthreonine	11.8|60.6|61.1|54.3	4	M-H	C9H17N3O5	51.1 | 51.1 | 49.8	0.553210644980781 | 0.553210644980781 | 0.553210644865768	95.3675		246.11	1	8.26438	0.192683	4416.74	4421.95	4204.5	4414.77	4376.47	4696.56	952.581	1141.45	1393.14	1208.53	730.641	1595.71	2040.6	2192.65	1566.86	2525.43	5974.8	5450.09	4860.11	5528.92	5409.56	7784.33	8304.18	10159.7	8924.01	7674.39		5.01691	6.25e-07	2.18e-06
9.72_246.1097m/z	L3	HMDB0029075 | HMDB0029059 | HMDB0028807	Threoninyl-Gamma-glutamate | Threoninyl-Glutamine | Glutaminylthreonine	3	Endogenous	HMDB0240212|HMDB0029075|HMDB0029059|HMDB0028807	(alpha-keto-dimethyl-delta-N,N-Dimethylguanidynol) valeric acid|Threoninyl-Gamma-glutamate|Threoninyl-Glutamine|Glutaminylthreonine	37.1|61.2|61.3|54.7	4	M-H	C9H17N3O5	49.8 | 49.8 | 48.5	0.576820899798077 | 0.576820899798077 | 0.576820899683064	88.5989		246.11	1	9.71575	0.188667	5674.29	5894.14	5922.78	6078.41	6152.35	5800.42	2131.17	2117.88	2311.71	2494.23	2705.11	3738.73	3966.38	3868.9	4100.25	4133.26	6147.57	8700.2	7235.21	7828.21	7651.11	12097.8	10480.1	10758.7	11644.7	11319.6		3.19404	2.69e-07	1.15e-06
4.04_297.0707m/z	L3	HMDB0042036 | HMDB0028818 | HMDB0011737	Thymidine glycol | Glutamylglutamic acid | gamma-Glutamylglutamic acid	3	Endogenous	HMDB0042036|HMDB0028818|HMDB0011737	Thymidine glycol|Glutamylglutamic acid|gamma-Glutamylglutamic acid	49.3|48.2|48.7	3	M+Na-2H	C10H16N2O7	48.6 | 48.3 | 48.4	1.10861791780607 | 1.10861791801195 | 1.10861791801195	94.8076		297.071	1	4.04345	0.16245	3185.9	3058.17	3131.93	3240.92	3261.83	3436.78	2337.21	2228.18	2570.93	2557.02	2234.08	3772.83	4171.77	4256.19	4057.66	4435.89	2683.36	2459.12	2465.33	2645.95	2398.62	4104.06	3719.58	3942.19	3891.29	3811.59		1.06078	0.157225	0.0765337
2.29_262.0383m/z	L3	HMDB0006409 | HMDB0002194 | HMDB0001876	Tyramine-O-sulfate | N-acetyl-S-(3-oxo-3-carboxy-n-propyl)cysteine | Epinephrine sulfate	3	Endogenous	HMDB0006409|HMDB0002194|HMDB0001876	Tyramine-O-sulfate|N-acetyl-S-(3-oxo-3-carboxy-n-propyl)cysteine|Epinephrine sulfate	25.4|28|28	3	M+FA-H | M-H | M-H	C8H11NO4S | C9H13NO6S | C9H13NO6S	37.6 | 38.4 | 38.4	-3.58640058112496 | -2.95916202559365 | -2.95916202537756	66.9264164143534 | 67.3166203348727 | 67.3166203348727		262.038	1	2.29065	0.297767	23794.4	25490	25351.8	23985.3	25516.3	22141.9	36138.9	38471.6	27943.6	38189.1	33066.7	23015.2	23742	31535.3	24016.7	25122.1	19170.1	44945.7	22491.5	16197.1	20143.5	10175	29353.4	22553.4	23118.6	11413.8		-1.41369	0.0589497	0.0333997
8.59_244.1668m/z	L3	HMDB0029132 | HMDB0028964 | HMDB0014849	Valyl-Lysine | Lysyl-Valine | Diethylcarbamazine	3	Endogenous	HMDB0029132|HMDB0028964|HMDB0014849	Valyl-Lysine|Lysyl-Valine|Diethylcarbamazine	44.9|34.7|40.7	3	M-H | M-H | M+FA-H	C11H23N3O3 | C11H23N3O3 | C10H21N3O	48.1 | 46 | 47.5	0.414510273305636 | 0.414510273305636 | 0.510263404088751	95.9220009886033 | 95.9220009886033 | 97.4916956749159		244.167	1	8.58843	0.2277	8121.71	8265.63	8356.04	8568.08	8557.46	8032.01	2662.39	3220.97	3441.65	3254.87	2324.1	4217.51	4824.77	4964.39	3942.45	5163.26	11066.8	10135.3	9833.74	10421.3	10182.2	15214.4	14550.3	17487.3	15913.3	15427.2		3.4648	1.91e-07	9.07e-07
1.24_314.2462n	L3	HMDB0031679 | HMDB0004705 | HMDB0004704 | HMDB0000782	(9xi,10xi,12xi)-9,10-Dihydroxy-12-octadecenoic acid | 12,13-DHOME | 9,10-DHOME | Octadecanedioic acid	4	Endogenous|Food	HMDB0041220|HMDB0031679|HMDB0004705|HMDB0004704|HMDB0000782	Dibutyl decanedioate|(9xi,10xi,12xi)-9,10-Dihydroxy-12-octadecenoic acid|12,13-DHOME|9,10-DHOME|Octadecanedioic acid	15.1|36.5|34.7|36.5|32.2	5	M-H2O-H, M-H	C18H34O4	46.3 | 45.9 | 46.3 | 45.4	1.60841967510798 | 1.60841967510798 | 1.60841967510798 | 1.60841967492709	96.7383	314.246	313.239	1	1.23532	0.262883	440722	441433	435238	444901	434363	393944	989603	976590	1.0528e+06	1.06216e+06	1.18067e+06	575648	555363	224463	782207	702828	64953.5	142213	45827	48430.1	56121.3	76530.9	295213	77604.1	98846.4	180230		-14.7166	9.32e-07	3.02e-06
8.07_342.1167n	L3	HMDB0000163 | HMDB0000186 | HMDB0000975 | HMDB0000055	MALTOSE | LACTOSE | TREHALOSE | CELLOBIOSE	4	Endogenous|Food	HMDB0000258|HMDB0256083|HMDB0000163|HMDB0000186|HMDB0000975|HMDB0000055|HMDB0133305|HMDB0125600|HMDB0060068|HMDB0041627|HMDB0039876|HMDB0039727|HMDB0039237|HMDB0038489|HMDB0037138|HMDB0033368|HMDB0029933|HMDB0029919|HMDB0029898|HMDB0029882|HMDB0029880|HMDB0011742|HMDB0011740|HMDB0006792|HMDB0006603|HMDB0005826|HMDB0002923|HMDB0000975|HMDB0000740|HMDB0000258|HMDB0000186|HMDB0000163|HMDB0000055|HMD…	SUCROSE|PALATINOSE|MALTOSE|LACTOSE|TREHALOSE|CELLOBIOSE|6-({[3,4,5-trihydroxy-6-(hydroxymethyl)oxan-2-yloxy}methyl)oxane-2,3,4,5-tetrol|2-{[3,4-dihydroxy-2,5-bis(hydroxymethyl)oxolan-2-yloxy}-6-(hydroxymethyl)oxane-3,4,5-triol|Glucose-1,3-mannose oligosaccharide|beta-Lactose|Fagopyritol A1|Trehalulose|Glucinol|Allolactose|Maltodextrin|DEAE-cellulose|Mannobiose|Maltulose|Inulobiose|Sakebiose|Neotr…	0|0|0|0|0|0|39.8|39.8|39.8|39.8|39.8|39.9|37.1|39.8|39.8|39.8|39.8|39.9|39.6|39.8|39.8|39.7|39.7|39.8|39.7|39.8|39.8|39.8|39.8|39.8|39.8|39.8|39.8|39.8	34	M+FA-H, 2M-H, M-H	C12H22O11	41.5	1.36808	98.6456	342.117	387.115	1	8.07172	0.32405	4.68029e+06	4.74891e+06	4.77596e+06	4.94746e+06	4.88957e+06	4.76558e+06	1.18525e+06	1.14792e+06	1.28453e+06	1.18281e+06	1.85498e+06	5.10791e+06	5.0486e+06	4.35871e+06	6.05568e+06	5.03488e+06	794644	546409	708050	805713	1.08986e+06	1.29179e+07	8.31186e+06	7.20241e+06	8.38856e+06	1.09832e+07		-1.68721	0.00589677	0.00472439
5.73_180.0630n	L3	HMDB0003418 | HMDB0000169 | HMDB0000660 | HMDB0001266	TAGATOSE | MANNOSE | FRUCTOSE | SORBOSE	4	Endogenous|Food	HMDB0003418|HMDB0000169|HMDB0000660|HMDB0001266|HMDB0240211|HMDB0240210|HMDB0240209|HMDB0240208|HMDB0240207|HMDB0125599|HMDB0062538|HMDB0062473|HMDB0062202|HMDB0062138|HMDB0061922|HMDB0034220|HMDB0033704|HMDB0032222|HMDB0012326|HMDB0006088|HMDB0003449|HMDB0003418|HMDB0003345|HMDB0001266|HMDB0001151|HMDB0000660|HMDB0000516|HMDB0000346|HMDB0000211|HMDB0000169|HMDB0000143|HMDB0000122	TAGATOSE|MANNOSE|FRUCTOSE|SORBOSE|allo-inositol|cis-inositol|D-chiro-inositol|neo-inositol|epi-Inositol|2,5-bis(hydroxymethyl)oxolane-2,3,4-triol|Fructose-1P|Glycoprotein-phospho-D-mannose|3(S)-hydroxy-all-cis-8,11,14,17-eicosatetraenoyl-CoA|muco-Inositol|Alpha-D-Glucopyranoside|Levoinositol|L-Galactose|Dihydroxyacetone (dimer)|L-Gulose|scyllo-Inositol|Beta-D-Galactose|D-Tagatose|Alpha-D-Glucose|…	0|0|0|0|3.1|3.1|3.1|3.1|3.1|3.64|3.41|3.89|4.19|3.1|4.19|3.1|4.19|3.62|4.19|3.1|4.2|3.41|4.2|3.41|4.2|3.41|4.19|4.53|3.1|4.19|4.19|4.19	32	M-H, M+FA-H	C6H12O6	40.9	-2.31685	94.6002	180.063	179.056	1	5.7347	0.491217	20768.4	21339.4	21894	21559.2	21755.9	19889.5	25740.4	23784.2	25440	24204.9	26971	24122.8	26239.3	26003.1	25976.4	26720.9	16229.5	17452	16506.1	18875.6	16510.5	19113.1	19153.4	21674.1	20378.5	18752		-1.47406	4.5e-06	1.05e-05
1.26_270.2199n	L3	HMDB0030978 | HMDB0030973 | HMDB0030972 | HMDB0010733	11-Oxohexadecanoic acid | 9-Oxohexadecanoic acid | 8-Oxohexadecanoic acid | 3-Oxohexadecanoic acid	4	Endogenous|Food	HMDB0030978|HMDB0030973|HMDB0030972|HMDB0010733	11-Oxohexadecanoic acid|9-Oxohexadecanoic acid|8-Oxohexadecanoic acid|3-Oxohexadecanoic acid	36.6|35.4|34.8|33.7	4	M-H, M+FA-H	C16H30O3	46.4 | 46.1 | 46 | 45.8	1.38348	96.9372	270.22	269.213	1	1.26158	0.258517	98585.6	99450.6	98597.9	100389	97391	91353.3	136640	164720	151855	157538	165315	156015	172668	103099	198692	172776	23660.7	23762	20208.5	18582.8	27132.3	46187.7	75972.7	30766.4	34146.9	91785		-6.84687	5.69e-09	7.74e-08
5.08_196.0224m/z	L3	HMDB0060273 | HMDB0039163 | HMDB0003470 | HMDB0000812	2-Amino-3-oxoadipate | D-N-(Carboxyacetyl)alanine | N-Formyl-L-glutamic acid | N-Acetyl-L-aspartic acid	4	Endogenous|Food	HMDB0000812|HMDB0060273|HMDB0039163|HMDB0003470|HMDB0000812	[IHL:N-ACETYLASPARTIC ACID]|2-Amino-3-oxoadipate|D-N-(Carboxyacetyl)alanine|N-Formyl-L-glutamic acid|N-Acetyl-L-aspartic acid	0|56.8|56.7|63.1|56.7	5	M+Na-2H	C6H9NO5	50.5 | 50.5 | 51.8 | 50.5	-1.66666378862344 | -1.66666378862344 | -1.66666378846108 | -1.66666378862344	97.6413		196.022	1	5.07717	0.31545	31841.7	29670.3	29049	28052.9	26897.3	32801.7	7290.54	6538.05	6367.42	6484.72	12093.2	5208.66	4187.35	3874.62	4711.51	4102.98	35326.7	35599.5	35467	35474.3	37651.6	30052	31213.4	26029.1	28062.5	29448.8		4.62989	1.3e-06	3.9e-06
5.47_347.1100m/z	L3	HMDB0133673 | HMDB0038708 | HMDB0034863 | HMDB0034755	3,4,5-trihydroxy-6-(2-methyl-3-phenylpropoxy)oxane-2-carboxylic acid | Citrusin C | 4-(4-Hydroxyphenyl)-2-butanone glucoside | 1-Methoxy-3-(4-hydroxyphenyl)-2E-propenal 4'-glucoside	4	Endogenous|Food	HMDB0133673|HMDB0038708|HMDB0034863|HMDB0034755	3,4,5-trihydroxy-6-(2-methyl-3-phenylpropoxy)oxane-2-carboxylic acid|Citrusin C|4-(4-Hydroxyphenyl)-2-butanone glucoside|1-Methoxy-3-(4-hydroxyphenyl)-2E-propenal 4'-glucoside	45.7|40|40|40	4	M+Na-2H	C16H22O7	46.6 | 45.5 | 45.5 | 45.5	-3.8262	91.9969		347.11	1	5.47168	0.13615	4111.85	4298.68	4112.19	4204.01	4403.65	3837.01	3779.09	3313.88	3701.36	4275.51	3674.56	5670.98	7391.66	6311.83	6501.5	6563.08	2959.82	2665.04	2508.73	2986.64	3041.28	3332.1	3592.69	4289.2	3921.23	4594.93		-1.32362	0.000982421	0.00101932
7.69_323.0289m/z	L3	HMDB0060282 | HMDB0011641 | HMDB0001271 | HMDB0000288	3'-UMP | Uridine 2'-phosphate | Pseudouridine 5'-phosphate | Uridine 5'-monophosphate	4	Endogenous|Food	HMDB0060282|HMDB0040718|HMDB0033963|HMDB0032753|HMDB0032752|HMDB0032751|HMDB0032750|HMDB0015380|HMDB0011641|HMDB0001271|HMDB0000288	3'-UMP|Zwiebelane B|Allicin|R-1-Propenyl 2-propenesulfinothioate|R-2-Propenyl 1-propenesulfinothioate|S-1-Propenyl 2-propenesulfinothioate|S-2-Propenyl 1-propenesulfinothioate|Olsalazine|Uridine 2'-phosphate|Pseudouridine 5'-phosphate|Uridine 5'-monophosphate	45.8|0|0|0|0|0|0|0|45.8|47.3|46	11	M-H	C9H13N2O9P	47.7 | 47.7 | 48.1 | 47.8	1.00825	94.1497		323.029	1	7.69067	0.3285	16744.4	16800.5	16264.9	16002.5	16557.4	15005.6	15288.5	16227.2	16159.3	16382.7	16964.5	23440.1	25549.3	22973.3	24948	25063.3	12317.8	12848.4	11166.2	11584.7	12140.2	16793.6	14516.5	14352.8	13076.2	15007.2		-1.34909	7.67e-06	1.66e-05
7.11_159.0770m/z	L3	HMDB0031411 | HMDB0028680 | HMDB0003459 | HMDB0000323	4-Acetamido-2-aminobutanoic acid | Alanyl-Alanine | D-Alanyl-D-alanine | 3-Amino-2-piperidone	4	Endogenous|Food	HMDB0061162|HMDB0031411|HMDB0028680|HMDB0003459|HMDB0000323	N-Mononitrosopiperazine|4-Acetamido-2-aminobutanoic acid|Alanyl-Alanine|D-Alanyl-D-alanine|3-Amino-2-piperidone	51|63.7|63.4|63.4|70.1	5	M-H | M-H | M-H | M+FA-H	C6H12N2O3 | C6H12N2O3 | C6H12N2O3 | C5H10N2O	50.5 | 50.4 | 50.4 | 51.7	-3.3626948838345 | -3.3626948838345 | -3.3626948838345 | -4.71877887378618	92.6428655594343 | 92.6428655594343 | 92.6428655594343 | 94.0908640597363		159.077	1	7.11212	0.372783	47495.3	50759.9	49420.7	46367.9	45978.8	37711.6	26972.5	29199.8	22572.7	26600.3	26553.8	21982.6	21529.7	24109.4	19866.8	18805.9	74898.7	82517.7	72004.2	88683.5	69641.1	74258.2	52451.8	45081.2	38478.7	35646.9		2.93971	1.12e-07	5.98e-07
6.77_364.1521m/z	L3	HMDB0060784 | HMDB0034593 | HMDB0030270 | HMDB0030211	6-beta-Naltrexol | (S)-Codamine | Anomurine | (R)-Laudanidine	4	Endogenous|Food	HMDB0060784|HMDB0034593|HMDB0033266|HMDB0030270|HMDB0030211	6-beta-Naltrexol|(S)-Codamine|Gossyrubilone|Anomurine|(R)-Laudanidine	30.2|29.2|0|29.2|29.2	5	M+Na-2H	C20H25NO4	43.6 | 43.4 | 43.4 | 43.4	-2.72686	91.24		364.152	1	6.7697	1.12335	23028.5	24044.2	23615.8	24182.8	24378.5	20900.1	8845.61	10110.1	10466	9721.11	8764.51	29269.4	32654.7	32561.1	28826.3	33304.5	19180.4	16033.1	16929.8	19099.6	17416.5	35069.9	28856.1	33216.1	31825.2	34036.3		1.85065	1.69e-06	4.78e-06
1.92_124.0397m/z	L3	HMDB0061705 | HMDB0061082 | HMDB0014491 | HMDB0000894	6-Oxopiperidine-2-carboxylic acid | 5-ethyl-5-methyl-2,4-oxazolidinedione | Trimethadione | Vinylacetylglycine	4	Endogenous	HMDB0061705|HMDB0061082|HMDB0014491|HMDB0000894	6-Oxopiperidine-2-carboxylic acid|5-ethyl-5-methyl-2,4-oxazolidinedione|Trimethadione|Vinylacetylglycine	30.6|31.5|25.3|29.1	4	M-H2O-H	C6H9NO3	44 | 44.2 | 43 | 43.7	-4.9504	95.2875		124.04	1	1.92282	0.144517	1368.41	1389.73	1320.77	1273.66	1172.48	1131.1	842.68	972.603	855.205	922.028	667.903	1619.85	2107.31	2231.46	1338.28	1276.63	1587.95	779.136	1363.28	1226.6	1485.79	1813.3	949.039	1228.65	1143.7	2218.97		1.51224	0.0242324	0.01571
11.59_426.0231m/z	L3	HMDB0006880 | HMDB0001341 | HMDB0000960 | HMDB0000061	Acetyl adenylate | ADP | dGDP | Adenosine 3',5'-diphosphate	4	Endogenous|Food	HMDB0006880|HMDB0001341|HMDB0000960|HMDB0000061	Acetyl adenylate|ADP|dGDP|Adenosine 3',5'-diphosphate	78|78|72.5|73.3	4	M+K-2H | M-H | M-H | M-H	C12H16N5O8P | C10H15N5O10P2 | C10H15N5O10P2 | C10H15N5O10P2	53.5 | 53.8 | 52.7 | 52.9	2.19867824755986 | 2.27446326878725 | 2.27446326878725 | 2.27446326878725	92.3104005751494 | 93.8759692742188 | 93.8759692742188 | 93.8759692742188		426.023	1	11.5948	2.79335	150463	158832	152315	148944	148865	124448	168577	181081	161438	174101	186465	233955	203634	194123	222286	187777	168784	58163.2	174442	167486	204107	189044	100713	120955	106967	193982		-1.12766	0.40379	0.164116
7.29_473.1533m/z	L3	HMDB0041221 | HMDB0039818 | HMDB0039705 | HMDB0038862	b-D-Xylopyranosyl-(1->4)-a-L-rhamnopyranosyl-(1->2)-L-arabinose | a-L-Arabinofuranosyl-(1->2)-[a-D-mannopyranosyl-(1->6)]-D-mannose | alpha-D-Xylopyranosyl-(1->6)-beta-D-glucopyranosyl-(1->4)-D-glucose | D-Galactopyranosyl-(1->3)-D-galactopyranosyl-(1->3)-L-arabinose	4	Food	HMDB0041221|HMDB0039818|HMDB0039705|HMDB0038862	b-D-Xylopyranosyl-(1->4)-a-L-rhamnopyranosyl-(1->2)-L-arabinose|a-L-Arabinofuranosyl-(1->2)-[a-D-mannopyranosyl-(1->6)]-D-mannose|alpha-D-Xylopyranosyl-(1->6)-beta-D-glucopyranosyl-(1->4)-D-glucose|D-Galactopyranosyl-(1->3)-D-galactopyranosyl-(1->3)-L-arabinose	41|41.4|41.3|41.4	4	M+FA-H | M-H | M-H | M-H	C16H28O13 | C17H30O15 | C17H30O15 | C17H30O15	46.3 | 46.2 | 46.2 | 46.2	4.93184040691232 | 4.45332329503589 | 4.45332329503589 | 4.45332329503589	95.9738077449106 | 94.6736453192882 | 94.6736453192882 | 94.6736453192882		473.153	1	7.29203	0.280783	28592.3	31959.9	31574.3	30307.5	30327.9	23371.1	15356.6	16583.1	16170.9	17477.4	15290.3	35182.3	43741.9	47577.1	36839.4	46705.4	20854.8	17278.7	17152.7	22918.3	18361.5	42643.8	36461.8	48826.4	41732.4	37412.2		1.19397	0.0238462	0.0155198
9.21_216.1352m/z	L3	HMDB0060442 | HMDB0028944 | HMDB0028692 | HMDB0012230	beta-Alanyl-L-lysine | Lysyl-Alanine | Alanyl-Lysine | Gamma-glutamyl-L-putrescine	4	Endogenous	HMDB0060442|HMDB0028944|HMDB0028692|HMDB0012230	beta-Alanyl-L-lysine|Lysyl-Alanine|Alanyl-Lysine|Gamma-glutamyl-L-putrescine	45.7|34.6|46.9|34.6	4	M-H	C9H19N3O3	46.9 | 44.6 | 47.1 | 44.6	-0.605249	89.3398		216.135	1	9.20678	0.2413	13051.1	13265.4	13448.8	13787.2	13716.7	13566	34770.8	37430	36578.7	35932.7	32797.3	11449.2	12137.1	10580.7	12240.6	11131.6	5994.7	5387.39	4986.56	5432.7	5139.66	9918.49	8741.88	9194.95	9144.18	9913.45		-6.58882	3.59e-11	1.61e-09
7.12_495.2583m/z	L3	HMDB0035096 | HMDB0035065 | HMDB0034677 | HMDB0030737	Cofaryloside | Cinncassiol D4 2-glucoside | Cinncassiol D1 glucoside | Capsianoside V	4	Endogenous|Food	HMDB0035096|HMDB0035065|HMDB0034677|HMDB0030737	Cofaryloside|Cinncassiol D4 2-glucoside|Cinncassiol D1 glucoside|Capsianoside V	32.6|30.3|40.1|42.6	4	M-H2O-H	C26H42O10	43.7 | 43.2 | 45.2 | 45.7	-3.15061371828187 | -3.15061371828187 | -3.15061371850293 | -3.15061371828187	89.3739		495.258	1	7.12087	0.267283	23420.9	24324.2	24287.7	24545.2	24451.2	21509.1	8155.37	8657.9	9190.19	7963.81	9083.83	26811.8	28699.1	30244.9	25952.4	28978.8	20679.8	24241.6	18886.5	21876.2	20536.5	33098.4	35202.6	33844.5	33862.8	34849.9		2.46731	9.28e-08	5.05e-07
8.68_262.0804n	L3	HMDB0030419 | HMDB0028815 | HMDB0028752 | HMDB0011164	gamma-Glutamylaspartic acid | Glutamylaspartic acid | Aspartyl-Glutamate | L-beta-aspartyl-L-glutamic acid	4	Endogenous|Food	HMDB0030419|HMDB0028815|HMDB0028752|HMDB0011164	gamma-Glutamylaspartic acid|Glutamylaspartic acid|Aspartyl-Glutamate|L-beta-aspartyl-L-glutamic acid	22.6|22.4|31.1|31.1	4	M-H2O-H, M-H	C9H14N2O7	43.3 | 43.3 | 45 | 45	1.07381	95.3788	262.08	261.073	1	8.68038	0.442533	20777.7	21478.7	20577.3	19359.4	19071	17111.9	11348.6	12224.4	11477	12418.2	11883.4	20210.5	22310.4	23499.1	20472.6	21833.3	18533.6	16761.9	18205.9	23020.6	17768.8	26045.3	23866.7	28509.3	26010.8	24649.5		1.58868	4.18e-05	6.77e-05
8.58_304.1154m/z	L3	HMDB0029150 | HMDB0028877 | HMDB0028861 | HMDB0028798	Gamma-glutamyl-Hydroxyproline | Hydroxyprolyl-Gamma-glutamate | Hydroxyprolyl-Glutamine | Glutaminylhydroxyproline	4	Endogenous	HMDB0038516|HMDB0029150|HMDB0028877|HMDB0028861|HMDB0028798	Linatine|Gamma-glutamyl-Hydroxyproline|Hydroxyprolyl-Gamma-glutamate|Hydroxyprolyl-Glutamine|Glutaminylhydroxyproline	17.3|69.6|75.2|71.8|69.6	5	M+FA-H	C10H17N3O5	53.1 | 54.3 | 53.6 | 53.1	1.48907	97.8363		304.115	1	8.58405	0.2102	38865.2	40624.9	39239.2	39042.7	37754.9	36361.3	55682.1	59929.1	62391.1	61254.7	93779.5	46958.6	45405.2	37667.6	50099.3	37880.6	27031.1	22066	28352.4	26184.1	30483.8	30647.9	20840.9	20183.7	23647	25542.3		-2.48317	3.07e-05	5.17e-05
8.75_304.1154m/z	L3	HMDB0029150 | HMDB0028877 | HMDB0028861 | HMDB0028798	Gamma-glutamyl-Hydroxyproline | Hydroxyprolyl-Gamma-glutamate | Hydroxyprolyl-Glutamine | Glutaminylhydroxyproline	4	Endogenous	HMDB0038516|HMDB0029150|HMDB0028877|HMDB0028861|HMDB0028798	Linatine|Gamma-glutamyl-Hydroxyproline|Hydroxyprolyl-Gamma-glutamate|Hydroxyprolyl-Glutamine|Glutaminylhydroxyproline	61.6|77.6|83.2|78.5|77.6	5	M+FA-H	C10H17N3O5	54.6 | 55.8 | 54.8 | 54.6	1.48306	97.4221		304.115	1	8.75045	0.262983	22188.1	23239.6	23213.5	22447.1	22875.7	19479.7	7577.09	8326.36	7070.58	8327.98	14122.6	17644.3	18799.3	17011.8	20684.3	18027.9	22911.7	31385	24063.9	29138	27733.3	37145	33614.6	34221.5	34083.4	35512.1		2.97706	3.59e-05	5.94e-05
9.36_274.1413m/z	L3	HMDB0029154 | HMDB0028950 | HMDB0004207 | HMDB0003869	gamma-Glutamyllysine | Lysyl-Glutamate | Glutamyllysine | Epsilon-(gamma-Glutamyl)-lysine	4	Endogenous	HMDB0029154|HMDB0028950|HMDB0004207|HMDB0003869	gamma-Glutamyllysine|Lysyl-Glutamate|Glutamyllysine|Epsilon-(gamma-Glutamyl)-lysine	68.6|62.1|69.3|68.7	4	M-H	C11H21N3O5	50.7 | 49.4 | 50.9 | 50.7	1.6326	86.9641		274.141	1	9.36028	0.210417	57406	57987.8	59660.4	60415.2	62506.8	57989.1	41506.5	41181.4	45627.9	45489.9	38826.1	58524.1	68112.1	69107.3	59657.4	73044	70079.3	59971.7	58599.8	65581.9	65300.9	69926.2	66409.1	75266.4	70089.5	65812.9		1.50276	1.79e-05	3.25e-05
7.66_256.1305m/z	L3	HMDB0029154 | HMDB0028950 | HMDB0004207 | HMDB0003869	gamma-Glutamyllysine | Lysyl-Glutamate | Glutamyllysine | Epsilon-(gamma-Glutamyl)-lysine	4	Endogenous	HMDB0029154|HMDB0028950|HMDB0004207|HMDB0003869	gamma-Glutamyllysine|Lysyl-Glutamate|Glutamyllysine|Epsilon-(gamma-Glutamyl)-lysine	56|54.9|62.7|56	4	M-H2O-H	C11H21N3O5	48.4 | 48.1 | 49.7 | 48.3	0.765173	86.6549		256.13	1	7.66	0.21465	22033.8	22454.6	22127.9	22928.9	23484.5	22413.9	18779.4	18920.1	20080	20761.5	18869.7	28589.1	31345.2	31476.5	29883.8	32331.7	16178	15538.9	15327.5	15783.4	15499.3	25670.4	23336.5	25747.9	24206.6	26370		-1.24364	1.02e-05	2.06e-05
3.46_259.0761m/z	L3	HMDB0034367 | HMDB0028972 | HMDB0028825 | HMDB0004822	gamma-Glutamylmethionine | Methionyl-Glutamate | Glutamylmethionine | Methyl bisnorbiotinyl ketone	4	Endogenous|Food	HMDB0034367|HMDB0028972|HMDB0028825|HMDB0004822	gamma-Glutamylmethionine|Methionyl-Glutamate|Glutamylmethionine|Methyl bisnorbiotinyl ketone	28.3|27|28.3|26.8	4	M-H2O-H | M-H2O-H | M-H2O-H | M+FA-H	C10H18N2O5S | C10H18N2O5S | C10H18N2O5S | C9H14N2O2S	42.3 | 42.1 | 42.3 | 42.3	0.934522698879734 | 0.934522698879734 | 0.934522698879734 | 1.21396065291018	84.5405582782631 | 84.5405582782631 | 84.5405582782631 | 86.1653161077443		259.076	1	3.45598	0.258367	7467.43	7911.15	7735.79	7568.02	7521.52	6817.66	102.825	108.696	131.021	87.5406	108.722	136.399	183.353	13024.8	178.937	194.305	407.798	16793.8	3602.9	8492.35	747.013	5634.15	30059.9	31370.1	27316.1	447.672		55.7601	0.00179761	0.00171918
8.05_216.0988m/z	L3	HMDB0028790 | HMDB0028701 | HMDB0028685 | HMDB0000856	Glutaminylalanine | Alanyl-Gamma-glutamate | Alanyl-Glutamine | N-a-Acetylcitrulline	4	Endogenous	HMDB0028790|HMDB0028701|HMDB0028685|HMDB0000856	Glutaminylalanine|Alanyl-Gamma-glutamate|Alanyl-Glutamine|N-a-Acetylcitrulline	45.7|47.7|47.7|38.6	4	M-H	C8H15N3O4	47.4 | 47.8 | 47.8 | 45.9	-0.939919120977782 | -0.939919120846871 | -0.939919120846871 | -0.939919120846871	92.2517		216.099	1	8.04543	0.205817	3313.07	3505.63	3399.5	3703.61	3758.4	3644.57	4318.41	3960.15	4542.93	4290.32	3538.18	1628.33	1813.58	1739.82	1630.61	1654.35	6043.55	6271.81	5001.27	5604.67	5585.31	4641.17	4089.81	5336.2	4833.73	5022.82		1.38047	0.000558209	0.000633614
5.75_187.1085m/z	L3	HMDB0028844 | HMDB0000759 | HMDB0000446 | HMDB0000206	Glycyl-Isoleucine | Glycylleucine | N-Alpha-acetyllysine | N6-Acetyl-L-lysine	4	Endogenous|Food	HMDB0029120|HMDB0028929|HMDB0028907|HMDB0028844|HMDB0028700|HMDB0000759|HMDB0000446|HMDB0000206	Valyl-Alanine|Leucyl-Glycine|Isoleucyl-Glycine|Glycyl-Isoleucine|Alanyl-Valine|Glycylleucine|N-Alpha-acetyllysine|N6-Acetyl-L-lysine	19.7|20.8|20.8|36.8|22.9|36.8|38.2|39.5	8	M-H	C8H16N2O3	46.2 | 46.2 | 46.5 | 46.8	-1.91149007784162 | -1.91149007799271 | -1.91149007784162 | -1.91149007784162	96.5916		187.108	1	5.75222	0.254133	5030.98	5404.89	5483.02	5317.45	5169.59	3935.7	700.111	879.366	1401.92	1034.38	1003.06	2714.33	3607.65	3864.03	2849.75	3913.35	6879.05	5459.37	6222.07	7076.13	6344.08	12200.6	10212	12118.7	10779.5	11733.2		6.37213	3.21e-07	1.31e-06
2.97_257.0217m/z	L3	HMDB0029473 | HMDB0029467 | HMDB0028771 | HMDB0028750	Isoeugenitin | Eugenitin | Cysteinyl-Aspartate | Aspartyl-Cysteine	4	Endogenous|Food	HMDB0041442|HMDB0029473|HMDB0029467|HMDB0028771|HMDB0028750	Hispolone|Isoeugenitin|Eugenitin|Cysteinyl-Aspartate|Aspartyl-Cysteine	0|9.91|9.91|19.7|20.2	5	M+K-2H | M+K-2H | M+Na-2H | M+Na-2H	C12H12O4 | C12H12O4 | C7H12N2O5S | C7H12N2O5S	39.4 | 39.4 | 41.4 | 41.5	-2.13394005818216 | -2.13394005818216 | 1.41559728478756 | 1.41559728478756	89.5645674534029 | 89.5645674534029 | 88.9208873989245 | 88.9208873989245		257.022	1	2.96553	0.183917	2325.55	2233.01	2137.04	2130.18	2053.37	2583.94	71.4426	72.3546	64.2661	62.4569	19.1949	17.0975	93.4372	3361.41	6.05231	10.6282	1787.69	7728.36	4206.85	5500.61	2598.98	3045.31	4204.18	3815.27	4156.29	400.798		75.324	2.43e-06	6.36e-06
4.14_261.0886m/z	L3	HMDB0031360 | HMDB0028991 | HMDB0011167 | HMDB0000706	L-cis-Cyclo(aspartylphenylalanyl) | Phenylalanyl-Aspartate | L-beta-aspartyl-L-phenylalanine | Aspartylphenylalanine	4	Endogenous|Food	HMDB0135612|HMDB0135605|HMDB0035665|HMDB0035009|HMDB0031360|HMDB0030881|HMDB0030722|HMDB0030672|HMDB0028991|HMDB0015058|HMDB0011167|HMDB0000706	(2E)-1-(4-methoxyphenyl)-3-phenylprop-2-en-1-ol|1-(4-methoxyphenyl)-3-phenylpropan-1-one|L-1,2,3,4-Tetrahydro-beta-carboline-3-carboxylic acid|Phenethyl phenylacetate|L-cis-Cyclo(aspartylphenylalanyl)|1-Acetoxy-4,6-tetradecadiene-8,10,12-triyne|(E)-3,5-Dimethoxystilbene|Obtustyrene|Phenylalanyl-Aspartate|Levosimendan|L-beta-aspartyl-L-phenylalanine|Aspartylphenylalanine	2.62|0|8.47|0|22.1|1.47|0|2.3|29.1|0.925|21.8|22.9	12	M-H | M-H2O-H | M-H2O-H | M-H2O-H	C13H14N2O4 | C13H16N2O5 | C13H16N2O5 | C13H16N2O5	42.5 | 43.9 | 42.5 | 42.7	2.06144183878792 | 1.92890829101322 | 1.92890829101322 | 1.92890829101322	93.0311911507297 | 92.7872064255564 | 92.7872064255564 | 92.7872064255564		261.089	1	4.14427	0.2322	6790.56	6839.74	6788.65	6959.87	7041.17	6589.68	9469.6	8998.91	8773.7	8738.52	9117.52	9155.63	9725.56	6344.72	10357.5	10547.2	7096.87	3246.8	6586.9	4524.77	6663.05	6554.98	2243.66	2341.44	3084.6	11069		-1.60387	0.00919929	0.00690139
3.69_249.1359m/z	L3	HMDB0028931 | HMDB0028909 | HMDB0028889 | HMDB0028888	Leucyl-Histidine | Isoleucyl-Histidine | Histidinyl-Leucine | Histidinyl-Isoleucine	4	Endogenous	HMDB0029560|HMDB0028931|HMDB0028909|HMDB0028889|HMDB0028888	Hesperaline|Leucyl-Histidine|Isoleucyl-Histidine|Histidinyl-Leucine|Histidinyl-Isoleucine	0|30.9|30.9|31.4|31.4	5	M-H2O-H	C12H20N4O3	44.9 | 44.9 | 45 | 45	0.748192	94.7473		249.136	1	3.6882	0.328617	6230.92	6412.9	6440.02	6415.31	6504.52	6157.44	2905.56	3016.98	2853.01	3461.12	1958.77	4160.92	5672.68	10947.7	3537.35	4088.61	6496.77	5914.54	6016.58	7122.92	6456.57	9942.83	9979.36	11897.4	11923.8	8283.85		2.25477	3.52e-05	5.84e-05
3.93_249.1359m/z	L3	HMDB0028931 | HMDB0028909 | HMDB0028889 | HMDB0028888	Leucyl-Histidine | Isoleucyl-Histidine | Histidinyl-Leucine | Histidinyl-Isoleucine	4	Endogenous	HMDB0029560|HMDB0028931|HMDB0028909|HMDB0028889|HMDB0028888	Hesperaline|Leucyl-Histidine|Isoleucyl-Histidine|Histidinyl-Leucine|Histidinyl-Isoleucine	0|31.4|31.4|31.9|31.9	5	M-H2O-H	C12H20N4O3	45.2 | 45.2 | 45.3 | 45.3	0.752441	95.285		249.136	1	3.93367	0.32025	9627.98	9949.49	9888.78	9715.01	9754.15	8702.35	4908.11	5355.71	4879.23	5847.6	4004.77	7372.31	9439.12	15542	6696.51	7220.72	8709.08	7661.39	8767.69	10145.1	8764.55	13928.7	13918.9	16345.4	16790.9	13062.1		1.76224	7.59e-05	0.000113648
7.90_267.1465m/z	L3	HMDB0028931 | HMDB0028909 | HMDB0028889 | HMDB0028888	Leucyl-Histidine | Isoleucyl-Histidine | Histidinyl-Leucine | Histidinyl-Isoleucine	4	Endogenous	HMDB0040152|HMDB0036194|HMDB0034878|HMDB0032375|HMDB0032374|HMDB0032277|HMDB0029560|HMDB0028931|HMDB0028909|HMDB0028889|HMDB0028888	3-Mercapto-1-hexanol|4-Methoxy-2-methyl-2-butanethiol|3-Mercapto-2-methylpentanol|(+/-)-4-Mercapto-4-methyl-2-pentanol|2-Mercapto-2-methyl-1-pentanol|(+/-)-3-(Ethylthio)butanol|Hesperaline|Leucyl-Histidine|Isoleucyl-Histidine|Histidinyl-Leucine|Histidinyl-Isoleucine	0|0|0|0|0|0|0|31.9|31.9|27.3|27.3	11	M-H	C12H20N4O3	44.8 | 44.8 | 43.8 | 43.8	0.97981	93.0698		267.147	1	7.90093	0.1883	3381.49	3304.61	3252.09	3300.61	3321.91	3423.18	243.553	403.934	470.684	462.71	85.9848	519.008	1015.54	988.713	478.6	1211.21	7088.49	2693.61	5744.4	5113.46	6815.91	10188.3	5008.37	6656.98	5370.41	9647.85		16.4716	4.59e-05	7.34e-05
7.69_313.1523m/z	L3	HMDB0028931 | HMDB0028909 | HMDB0028889 | HMDB0028888	Leucyl-Histidine | Isoleucyl-Histidine | Histidinyl-Leucine | Histidinyl-Isoleucine	4	Endogenous	HMDB0029560|HMDB0028931|HMDB0028909|HMDB0028889|HMDB0028888|HMDB0014662	Hesperaline|Leucyl-Histidine|Isoleucyl-Histidine|Histidinyl-Leucine|Histidinyl-Isoleucine|Carteolol	35.3|68.9|68.9|68.9|68.9|29.7	6	M+FA-H	C12H20N4O3	52.4 | 52.4 | 52.3 | 52.3	2.00317	95.2322		313.152	1	7.69067	0.17525	3296.47	3361.92	3485.75	3391.01	3437.39	3100.41	2398.97	2532.63	2953.59	3134.41	2407.79	5826.34	6951.97	6552.43	5797.32	6857.9	1071.76	1220.88	1221.32	1226.71	980.431	2032.18	2264.05	2883.01	2475.41	2466.98		-2.347	2.28e-06	6.07e-06
5.76_235.0725m/z	L3	HMDB0060485 | HMDB0031173 | HMDB0029445 | HMDB0001200	L-Formylkynurenine | 6-Hydroxy-1H-indole-3-acetamide | L-Agaridoxin | N'-Formylkynurenine	4	Endogenous|Food	HMDB0060670|HMDB0060669|HMDB0060485|HMDB0031173|HMDB0029445|HMDB0001200	2-Hydroxyfelbamate|p-Hydroxyfelbamate|L-Formylkynurenine|6-Hydroxy-1H-indole-3-acetamide|L-Agaridoxin|N'-Formylkynurenine	15.2|14.8|31.7|36.4|26.7|31.7	6	M-H | M+FA-H | M-H2O-H | M-H	C11H12N2O4 | C10H10N2O2 | C11H14N2O5 | C11H12N2O4	45.4 | 46.6 | 44.4 | 45.4	0.231407434935794 | 0.287423813980737 | 0.215021610655348 | 0.231407434935794	95.5608452358788 | 97.1413383258539 | 95.3097200744409 | 95.5608452358788		235.072	1	5.76097	0.179683	3115.68	3252.35	3182.59	3309.34	3208.06	3011	2539.31	2009.22	2113.05	2665.39	1709.17	4261.72	4554.45	4348.87	5303.33	6244.88	1776.9	2189.71	1815.42	2003.07	1450.85	2623.3	2892.28	4024.94	4023.64	3741.48		-1.19491	0.139156	0.0692176
2.89_275.1042m/z	L3	HMDB0038514 | HMDB0029156 | HMDB0029106 | HMDB0000594	L-gamma-Glutamyl-beta-phenyl-beta-L-alanine | Glutamylphenylalanine | Tyrosyl-Hydroxyproline | gamma-Glutamylphenylalanine	4	Endogenous|Food	HMDB0062178|HMDB0060811|HMDB0038514|HMDB0037942|HMDB0032349|HMDB0032058|HMDB0031865|HMDB0029156|HMDB0029106|HMDB0028994|HMDB0028875|HMDB0001894|HMDB0000594	N-lactoyl-Tryptophan|cyclic Melatonin|L-gamma-Glutamyl-beta-phenyl-beta-L-alanine|(1xi,3xi)-1,2,3,4-Tetrahydro-1-methyl-beta-carboline-3-carboxylic acid|Isoeugenyl benzyl ether|Isoeugenol benzyl ether|4'-tert-Butyl-2',6'-dimethyl-3',5'-dinitroacetophenone|Glutamylphenylalanine|Tyrosyl-Hydroxyproline|Phenylalanyl-Glutamate|Hydroxyprolyl-Tyrosine|Aspartame|gamma-Glutamylphenylalanine	12.6|14.2|34.5|14.2|0.409|0.409|0|35|22.2|14.9|19.2|14.4|35	13	M-H2O-H	C14H18N2O5	45.7 | 45.7 | 43.2 | 45.7	1.48309136427596 | 1.48309136427596 | 1.48309136408269 | 1.48309136427596	95.5298		275.104	1	2.88672	0.26745	23849.7	24741.9	24350.7	23847.9	24003.1	21823.1	15766.3	16064.4	16517	16974.9	16383.5	28882.9	33109	33915	29736	33643.1	17825.1	18194.5	17237.3	18861.3	16778.4	29569.1	27536.1	31647.2	30668.2	27380		1.088	0.00810215	0.00619422
9.39_275.1253m/z	L3	HMDB0062698 | HMDB0029128 | HMDB0028876 | HMDB0000279	L-saccharopinate(1-) | Valyl-Hydroxyproline | Hydroxyprolyl-Valine | Saccharopine	4	Endogenous|Food	HMDB0062698|HMDB0029128|HMDB0028876|HMDB0000279	L-saccharopinate(1-)|Valyl-Hydroxyproline|Hydroxyprolyl-Valine|Saccharopine	65.9|59.9|54.3|65.9	4	M-H | M+FA-H | M+FA-H | M-H	C11H20N2O6 | C10H18N2O4 | C10H18N2O4 | C11H20N2O6	52 | 51 | 49.9 | 52	1.61866287732061 | 1.94226129227201 | 1.94226129227201 | 1.61866287732061	96.0071426230872 | 97.5336496293538 | 97.5336496293538 | 96.0071426230872		275.125	1	9.39095	0.26735	14329.1	14438	15019	14877.5	15108.9	14562.5	9289.8	9353.77	10650.6	10517.7	9019.7	16893.8	20285.1	19971	18315.7	21793	13852.1	11150.9	11314.4	12600	12356.4	20002.2	18419.9	21119.4	19751.2	18236.6		1.2548	0.00253387	0.00228591
10.12_421.0762m/z	L3	HMDB0034410 | HMDB0029477 | HMDB0006789 | HMDB0001124	Mangiferin | Isomangiferin | Lactose 6-phosphate | Trehalose 6-phosphate	4	Endogenous|Food	HMDB0136140|HMDB0132198|HMDB0132197|HMDB0130279|HMDB0130275|HMDB0130261|HMDB0129277|HMDB0129273|HMDB0128712|HMDB0128710|HMDB0128701|HMDB0128700|HMDB0128695|HMDB0128694|HMDB0060019|HMDB0059986|HMDB0059984|HMDB0039307|HMDB0037691|HMDB0034410|HMDB0029477|HMDB0006789|HMDB0001124	3,5,7-trihydroxy-2-(3-hydroxy-4-methoxyphenyl)-6,8-dimethoxy-4H-chromen-4-one|2-(2,5-dihydroxy-4-methoxyphenyl)-5,7-dihydroxy-6,8-dimethoxy-4H-chromen-4-one|2-(2,3-dihydroxy-4-methoxyphenyl)-5,7-dihydroxy-6,8-dimethoxy-4H-chromen-4-one|2-(2,5-dihydroxy-4-methoxyphenyl)-5,7-dihydroxy-3,6-dimethoxy-4H-chromen-4-one|2-(2,3-dihydroxy-4-methoxyphenyl)-5,7-dihydroxy-3,6-dimethoxy-4H-chromen-4-one|2-(1,…	4.15|3.98|0|3.98|3.98|4.15|0|3.98|4.25|4.25|4.25|4.25|4.23|4.23|4.23|4.23|4.23|0|4.15|15.7|15.7|23.3|19.3	23	M-H	C19H18O11 | C19H18O11 | C12H23O14P | C12H23O14P	40.1 | 40.1 | 43.2 | 42.4	-3.45846427406769 | -3.45846427406769 | 2.15499408926964 | 2.15499408926964	88.9222597794518 | 88.9222597794518 | 95.1176075697577 | 95.1176075697577		421.076	1	10.1194	0.289817	13746.3	14410.6	14061.9	14669.4	14453.9	12924.4	16566.9	12782.5	12830.7	16968.3	14525.5	5753.54	6207.8	5825.04	6222.72	6616.69	23905.2	57104	35396.5	32812.2	26680.4	10815	8282.26	8937.67	8894.29	9790.53		2.38753	0.000918218	0.00095912
1.27_293.1771m/z	L3	HMDB0040646 | HMDB0035722 | HMDB0034779 | HMDB0005783	Myrsinone | Tanacetol A | Nordihydrocapsiate | Gingerol	4	Endogenous|Food	HMDB0040646|HMDB0035754|HMDB0035722|HMDB0034779|HMDB0015026|HMDB0013206|HMDB0005783	Myrsinone|Phytuberin|Tanacetol A|Nordihydrocapsiate|Granisetron|9-Decenoylcholine|Gingerol	28.9|2.12|37.2|27.6|0|1.12|27.6	7	M-H	C17H26O4	44.4 | 46.1 | 44.2 | 44.2	4.25468	98.1864		293.177	1	1.27035	0.289167	84006.9	85317.9	83899.3	84241.1	82443	74073.4	119970	126642	107320	150527	175245	67560.6	91873.8	109167	133970	71042.2	25373.4	94785.9	100078	75996.4	45259.1	101947	100152	156131	75560.7	31099.4		-1.99039	0.0202468	0.0134748
7.63_189.0877m/z	L3	HMDB0039222 | HMDB0031412 | HMDB0029054 | HMDB0028697	N-(gamma-Glutamyl)ethanolamine | 2-Amino-4-[(2-hydroxy-1-oxopropyl)amino]butanoic acid | Threoninyl-Alanine | Alanyl-Threonine	4	Endogenous|Food	HMDB0060385|HMDB0039222|HMDB0031412|HMDB0029054|HMDB0028697|HMDB0001370	4-Amino-1-piperidinecarboxylic acid|N-(gamma-Glutamyl)ethanolamine|2-Amino-4-[(2-hydroxy-1-oxopropyl)amino]butanoic acid|Threoninyl-Alanine|Alanyl-Threonine|Diaminopimelic acid	1.12|30|29.9|28.7|28.7|1.18	6	M-H	C7H14N2O4	44.1 | 44 | 43.8 | 43.8	-1.83036300708041 | -1.83036300722992 | -1.83036300708041 | -1.83036300708041	92.4706		189.088	1	7.62935	0.126983	1817.12	2019.36	1881.8	1863.05	2041.42	1973.28	660.309	643.708	811.693	677.208	555.359	1537.67	1492.72	1692.9	1539.33	1523.87	2525.63	2464.59	2181.2	2351.88	2500.75	3236.77	2967.48	3276.08	3025.05	3758.85		3.59111	5.29e-08	3.44e-07
9.09_319.1263m/z	L3	HMDB0032764 | HMDB0029163 | HMDB0028811 | HMDB0028795	N2-Succinoylarginine | Gamma-glutamyl-Gamma-glutamate | Glutaminyl-Gamma-glutamate | Glutaminylglutamine	4	Endogenous|Food	HMDB0032764|HMDB0029163|HMDB0028811|HMDB0028795|HMDB0015376	N2-Succinoylarginine|Gamma-glutamyl-Gamma-glutamate|Glutaminyl-Gamma-glutamate|Glutaminylglutamine|Trimeprazine	13.8|23.1|23.1|13.9|0	5	M+FA-H	C10H18N4O5	41.6 | 43.5 | 43.5 | 41.6	1.50385920689566 | 1.50385920710302 | 1.50385920710302 | 1.50385920710302	96.071		319.126	1	9.09232	0.337833	7529.46	7742.92	7728.7	7930.31	8156.81	7548.37	4481.45	4821.38	4973.19	5018.51	3885.49	6665.72	7972	8366.4	6752.69	9224.38	7307.61	6276.34	6275.38	6853.17	6429.64	11363.8	10661.8	12798.1	11852.2	11050.3		1.42977	0.000200155	0.00026431
3.43_351.1155n	L3	HMDB0060492 | HMDB0000796 | HMDB0000794 | HMDB0000785	N-acetyl-O-acetylneuraminate | N-Acetyl-4-O-acetylneuraminic acid | N-Acetyl-9-O-acetylneuraminic acid | N-Acetyl-7-O-acetylneuraminic acid	4	Endogenous	HMDB0060492|HMDB0000796|HMDB0000794|HMDB0000785	N-acetyl-O-acetylneuraminate|N-Acetyl-4-O-acetylneuraminic acid|N-Acetyl-9-O-acetylneuraminic acid|N-Acetyl-7-O-acetylneuraminic acid	40.6|41|40.6|40.7	4	M-H, M+Na-2H	C13H21NO10	46.1 | 46.2 | 46.1 | 46.1	-2.96518	93.493	351.116	372.09	1	3.4297	0.205817	12581.7	14153.8	12984.9	12384.4	12031.1	8461.7	21341.7	22925.9	14806.3	19842.8	22423.3	18753.7	18124	8081	18836.3	15489.8	12518.5	3096.48	10858	6887.11	11798.1	8515.33	1630.89	1767.87	2901.64	14926.7		-2.24411	0.0104399	0.00771661
8.72_132.0296m/z	L3	HMDB0062501 | HMDB0062186 | HMDB0006483 | HMDB0000191	N-acetyl-seryl-aspartate | 1-deoxy-1-(N6-lysino)-D-fructose | D-Aspartic acid | L-Aspartic acid	4	Endogenous|Food	HMDB0000191|HMDB0062501|HMDB0062186|HMDB0011753|HMDB0006483|HMDB0000191	[IHL:L-ASPARTIC ACID]|N-acetyl-seryl-aspartate|1-deoxy-1-(N6-lysino)-D-fructose|Iminodiacetic acid|D-Aspartic acid|L-Aspartic acid	95.3|73.5|73.5|40.4|73.5|73.5	6	M-H	C4H7NO4	52.5	-4.86085716034836 | -4.86085716034836 | -4.86085716034836 | -4.86085716056199	94.6731		132.03	1	8.7198	0.345933	56021.7	57590.6	56361.5	52438.7	52629.4	52821.1	69299.2	71385.9	66386.9	70924.2	75965.9	73993.9	71631.8	71592.9	71520.1	64609.3	37490.2	23815.2	69957.4	39833.6	37110.2	48849.5	38610.7	42478.1	35666.5	33469.5		-1.70005	0.00917506	0.00689785
8.90_132.0296m/z	L3	HMDB0062501 | HMDB0062186 | HMDB0006483 | HMDB0000191	N-acetyl-seryl-aspartate | 1-deoxy-1-(N6-lysino)-D-fructose | D-Aspartic acid | L-Aspartic acid	4	Endogenous|Food	HMDB0062501|HMDB0062186|HMDB0011753|HMDB0006483|HMDB0000191	N-acetyl-seryl-aspartate|1-deoxy-1-(N6-lysino)-D-fructose|Iminodiacetic acid|D-Aspartic acid|L-Aspartic acid	74.8|74.8|40.9|74.8|74.8	5	M-H	C4H7NO4	52.8	-4.81566110750588 | -4.81566110750588 | -4.81566110750588 | -4.81566110771952	94.6581		132.03	1	8.90397	0.377517	50932	52447.5	52571.2	53343.2	53716.6	49032.1	77351.1	77287.4	76604	79623.3	86386.5	72705	70722.1	68551.9	72385.7	69055.7	30222.6	20913.4	58397	32698.4	29951.5	42528.3	32782.2	37789.2	32431.6	28989.2		-2.30715	0.000692664	0.000758736
3.96_291.0992m/z	L3	HMDB0030269 | HMDB0029104 | HMDB0028831 | HMDB0011741	Nigellicine | Tyrosyl-Glutamate | Glutamyltyrosine | gamma-Glutamyltyrosine	4	Endogenous|Food	HMDB0130350|HMDB0130347|HMDB0060810|HMDB0041314|HMDB0041309|HMDB0030269|HMDB0029104|HMDB0028831|HMDB0014987|HMDB0013713|HMDB0011741	2,5-dimethoxy-4-[(2E)-3-phenylprop-2-en-1-yl]phenol|2,3-dimethoxy-4-[(2E)-3-phenylprop-2-en-1-yl]phenol|cyclic 6-Hydroxymelatonin|4-tert-Butylphenyl salicylate|(2S,4S)-Monatin|Nigellicine|Tyrosyl-Glutamate|Glutamyltyrosine|Methylphenobarbital|N-acetyltryptophan|gamma-Glutamyltyrosine	0.36|0.36|24.4|0|25.8|34.1|32.2|42.4|24.4|24.8|42.5	11	M+FA-H | M-H2O-H | M-H2O-H | M-H2O-H	C13H14N2O3 | C14H18N2O6 | C14H18N2O6 | C14H18N2O6	45.9 | 45.3 | 47.3 | 47.3	2.05880436857222 | 1.63382383117726 | 1.63382383117726 | 1.63382383117726	97.8809789768568 | 96.0979011444312 | 96.0979011444312 | 96.0979011444312		291.099	1	3.96432	0.293983	47669	49908.6	48900.2	49869.5	50189.3	44349.3	33125.9	33083	33527.2	35184.3	32108.6	56545.2	65277.9	66467.8	57364	66396.6	40210	37631.5	36596.6	38941.6	36947.5	62321.8	54434.8	63696.6	60262.7	57729.1		1.13949	0.000462424	0.000540815
8.40_97.9767n	L3	HMDB0002142 | HMDB0002105 | HMDB0001429 | HMDB0000973	Phosphoric acid | Dihydrogen phosphate | Phosphate | Hydrogen phosphate	4	Endogenous|Food	HMDB0002142|HMDB0002105|HMDB0001429|HMDB0000973	Phosphoric acid|Dihydrogen phosphate|Phosphate|Hydrogen phosphate	23.5|23.5|23.5|23.5	4	M+FA-H, 2M-H, M-H, M-H2O-H	H3O4P	44.1	-1.78481	99.1841	97.9767	194.946	1	8.40452	1.66955	1.056e+06	1.09916e+06	1.09588e+06	1.11564e+06	1.12254e+06	1.05529e+06	1.18704e+06	1.13111e+06	1.1273e+06	1.17737e+06	1.22206e+06	1.35545e+06	1.26074e+06	1.2686e+06	1.34474e+06	1.19274e+06	1.08075e+06	1.06423e+06	1.15594e+06	1.16153e+06	1.09683e+06	1.23335e+06	1.06029e+06	992289	1.07093e+06	1.18483e+06		-1.05137	0.0643173	0.0360536
2.14_179.0458m/z	L3	HMDB0059766 | HMDB0041912 | HMDB0015188 | HMDB0003269	Picolinoylglycine | Isonicotinylglycine | Mimosine | Nicotinuric acid	4	Endogenous	HMDB0059766|HMDB0041912|HMDB0015188|HMDB0003269	Picolinoylglycine|Isonicotinylglycine|Mimosine|Nicotinuric acid	28.4|19.4|34.2|28.4	4	M-H | M-H | M-H2O-H | M-H	C8H8N2O3 | C8H8N2O3 | C8H10N2O4 | C8H8N2O3	43.2 | 41.4 | 44.4 | 43.2	-2.3373849022291 | -2.3373849022291 | -2.12481770222126 | -2.33738490207125	90.6027391333654 | 90.6027391333654 | 90.3801230200052 | 90.6027391333654		179.046	1	2.13738	0.2934	23517.3	23185.5	22793.9	23361.1	22864.7	23352.8	34884.9	36487.3	35358	38676.6	30402.7	34314.9	33740.9	27085.1	31445.9	27354.6	26551.1	6883.56	31620.9	23770.8	25763.8	13829.6	4124	4104.83	5421.77	27448.7		-1.53425	0.0880203	0.0471426
1.52_728.4899m/z	L3	HMDB0112409 | HMDB0112387 | HMDB0112284 | HMDB0112283	PS(18:1(9Z)/15:0) | PS(18:1(11Z)/15:0) | PS(15:0/18:1(9Z)) | PS(15:0/18:1(11Z))	4	Endogenous|Food	HMDB0112409|HMDB0112387|HMDB0112284|HMDB0112283	PS(18:1(9Z)/15:0)|PS(18:1(11Z)/15:0)|PS(15:0/18:1(9Z))|PS(15:0/18:1(11Z))	27.4|27.4|26.4|26.4	4	M-H2O-H	C39H74NO10P	42.5 | 42.5 | 42.3 | 42.3	3.68568692899044 | 3.68568692899044 | 3.68568692914253 | 3.68568692914253	89.4861		728.49	1	1.51557	0.223317	45366.4	43227.6	43083.8	44998.3	45373.7	49503.7	54462.3	53954.7	58143.1	54920	82597	69444.8	71764.4	31746.7	69280.7	88204.3	24237	7652.15	11322.7	625.583	21292	46089.4	7385.22	2334.69	4454.27	87169.6		-4.66882	0.0155449	0.0107748
7.58_232.1058n	L3	HMDB0029062 | HMDB0028873 | HMDB0028766 | HMDB0001199	Threoninyl-Hydroxyproline | Hydroxyprolyl-Threonine | Aspartyl-Valine | N2-Succinyl-L-ornithine	4	Endogenous	HMDB0029393|HMDB0029123|HMDB0029062|HMDB0028873|HMDB0028766|HMDB0012161|HMDB0001199	L-N-(3-Carboxypropyl)glutamine|Valyl-Aspartate|Threoninyl-Hydroxyproline|Hydroxyprolyl-Threonine|Aspartyl-Valine|4-(Glutamylamino) butanoate|N2-Succinyl-L-ornithine	28.2|25.8|41.9|32.3|30.5|26.8|44	7	M-H, 2M-H, M-H2O-H	C9H16N2O5	46.9 | 45 | 44.7 | 47.3	-0.409131	93.2254	232.106	231.099	1	7.5768	0.28025	573513	578399	574680	566702	569177	546840	98524.8	103670	103014	99956.8	92341.2	123449	104434	128154	133681	129441	1.91353e+06	1.34759e+06	2.02928e+06	1.69345e+06	2.18327e+06	713325	452227	402928	414632	729734		18.4261	7.14e-10	1.81e-08
10.10_565.0493m/z	L3	HMDB0062573 | HMDB0060079 | HMDB0000302 | HMDB0000286	UDP-D-galactose(2-) | [(2R,3S,4R,5R)-5-(2,4-dioxo-1,2,3,4-tetrahydropyrimidin-1-yl)-3,4-dihydroxyoxolan-2-yl]methyl {[(3R,4S,5S,6R)-3,4,5-trihydroxy-6-(hydroxymethyl)oxan-2-yl phosphonato]oxy}phosphonate | Uridine diphosphategalactose | Uridine diphosphate glucose	4	Endogenous|Food	HMDB0062573|HMDB0060079|HMDB0000302|HMDB0000286	UDP-D-galactose(2-)|[(2R,3S,4R,5R)-5-(2,4-dioxo-1,2,3,4-tetrahydropyrimidin-1-yl)-3,4-dihydroxyoxolan-2-yl]methyl {[(3R,4S,5S,6R)-3,4,5-trihydroxy-6-(hydroxymethyl)oxan-2-yl phosphonato]oxy}phosphonate|Uridine diphosphategalactose|Uridine diphosphate glucose	43.2|43.2|43.2|43.2	4	M-H	C15H24N2O17P2	46.5	2.77233844006923 | 2.77233844006923 | 2.77233844027007 | 2.77233844006923	92.8061		565.049	1	10.1019	0.3735	14961.5	15633.8	15491.3	15914.7	15587.2	14023.2	43836.4	28080.5	25605.2	49559.8	29701.5	12683.5	10437.1	11602.2	10784.1	10714.9	8229.63	7719.81	6289.25	7024.4	6269.86	9231.65	10180.8	13297.9	15272.8	15569.1		-4.9752	3.8e-06	9.1e-06
2.95_211.0723m/z	L3	HMDB0039110 | HMDB0031701 | HMDB0029013 | HMDB0028761 | HMDB0002335	(2S,3'S)-alpha-Amino-2-carboxy-5-oxo-1-pyrrolidinebutanoic acid | 1-(gamma-Glutamylamino)cyclopropanecarboxylic acid | Prolyl-Aspartate | Aspartyl-Proline | Aspartyl-L-proline	5	Endogenous|Food	HMDB0039110|HMDB0031701|HMDB0029756|HMDB0029013|HMDB0028761|HMDB0002335	(2S,3'S)-alpha-Amino-2-carboxy-5-oxo-1-pyrrolidinebutanoic acid|1-(gamma-Glutamylamino)cyclopropanecarboxylic acid|(1R,2S,3R)-2-Acetyl-4(5)-(1,2,3,4-tetrahydroxybutyl)imidazole|Prolyl-Aspartate|Aspartyl-Proline|Aspartyl-L-proline	24.1|24.1|0|23.4|23.4|23.4	6	M-H2O-H	C9H14N2O5	43.8 | 43.8 | 43.7 | 43.7 | 43.7	-0.610372	95.8069		211.072	1	2.9524	0.22345	5325.34	5487.44	5422.95	5189.98	5490.12	5023.68	3903.04	4205.27	4480.03	4311.38	4340.97	6489.47	7369.53	6860.57	6968.91	7716.08	4306.86	3310.15	3741.87	4187.4	3813.46	6297.18	5412.67	6353.81	6145.93	6046.73		-1.09716	0.102417	0.0535754
3.35_329.0763m/z	L3	HMDB0038318 | HMDB0029386 | HMDB0028887 | HMDB0013030 | HMDB0004089	(R)-2-Hydroxy-2H-1,4-benzoxazin-3(4H)-one | Indicaxanthin | Histidinyl-Histidine | Noradrenochrome | Formylanthranilic acid	5	Endogenous|Food	HMDB0038318|HMDB0036582|HMDB0029386|HMDB0028887|HMDB0013030|HMDB0004291|HMDB0004089|HMDB0003454	(R)-2-Hydroxy-2H-1,4-benzoxazin-3(4H)-one|6-Methoxy-2(3H)-benzoxazolone|Indicaxanthin|Histidinyl-Histidine|Noradrenochrome|5-Pyridoxolactone|Formylanthranilic acid|4-Pyridoxolactone	44.8|0|47.6|46.2|43.4|0|41.2|0	8	2M-H | M+Na-2H | M+K-2H | 2M-H | 2M-H	C8H7NO3 | C14H16N2O6 | C12H16N6O3 | C8H7NO3 | C8H7NO3	47.5 | 47.4 | 47.4 | 47.2 | 46.8	-4.89831998116329 | 2.56026892568146 | -2.39873819459992 | -4.89831998116329 | -4.89831998116329	98.4859885090274 | 92.3356497081216 | 93.6469611264486 | 98.4859885090274 | 98.4859885090274		329.076	1	3.3465	0.245217	12781.6	12395	12474.2	12340.2	12766.8	14532.2	21692.4	21566.6	23200.3	21162.9	20213.2	16682.8	15842.6	8275.97	17539.2	15987.2	13834.7	2987.76	11487.8	7160.55	12260.8	9742.62	2099.59	2170.38	3094.02	14605.6		-2.2592	0.0102486	0.00759762
5.50_221.0902n	L3	HMDB0000212 | HMDB0000215 | HMDB0001129 | HMDB000853 | HMDB000803	N-ACETYLGALACTOSAMINE | N-ACETYLGLUCOSAMINE | N-Acetylmannosamine | N-Acetyl-b-D-galactosamine | beta-N-Acetylglucosamine	5	Endogenous|Food	HMDB0000212|HMDB0000215|HMDB0001129|HMDB000853|HMDB000803|HMDB0062641|HMDB0038751|HMDB0001129|HMDB0000853|HMDB0000803|HMDB0000389|HMDB0000215|HMDB0000212	N-ACETYLGALACTOSAMINE|N-ACETYLGLUCOSAMINE|N-Acetylmannosamine|N-Acetyl-b-D-galactosamine|beta-N-Acetylglucosamine|Aldehydo-N-acetyl-D-glucosamine|Avenic acid B|N-Acetylmannosamine|N-Acetyl-b-D-galactosamine|beta-N-Acetylglucosamine|2'-Deoxysepiapterin|N-Acetyl-D-glucosamine|N-Acetylgalactosamine	0|0|0|0|0|38|23.8|42.6|42.6|43.5|13.9|43.6|42.6	13	M-H, M+FA-H, M-H2O-H	C8H15NO6	49.1	1.28974	90.82	221.09	266.088	1	5.50233	0.4912	286439	293150	282468	267264	258164	244013	352608	374386	320026	358557	377487	247954	237469	244763	263523	217690	207068	262816	276672	215655	218020	222770	264261	261631	260465	236144		-1.51078	0.000212277	0.000278684
5.19_221.0902n	L3	HMDB0000212 | HMDB0000215 | HMDB0001129 | HMDB000853 | HMDB000803	N-ACETYLGALACTOSAMINE | N-ACETYLGLUCOSAMINE | N-Acetylmannosamine | N-Acetyl-b-D-galactosamine | beta-N-Acetylglucosamine	5	Endogenous|Food	HMDB0000212|HMDB0000215|HMDB0001129|HMDB000853|HMDB000803|HMDB0062641|HMDB0038751|HMDB0001129|HMDB0000853|HMDB0000803|HMDB0000389|HMDB0000215|HMDB0000212	N-ACETYLGALACTOSAMINE|N-ACETYLGLUCOSAMINE|N-Acetylmannosamine|N-Acetyl-b-D-galactosamine|beta-N-Acetylglucosamine|Aldehydo-N-acetyl-D-glucosamine|Avenic acid B|N-Acetylmannosamine|N-Acetyl-b-D-galactosamine|beta-N-Acetylglucosamine|2'-Deoxysepiapterin|N-Acetyl-D-glucosamine|N-Acetylgalactosamine	0|0|0|0|0|23.1|12.4|25.2|25.1|25.1|9.42|25.1|25.1	13	M-H, M+FA-H, M-H2O-H	C8H15NO6	39.2	1.23585	91.2886	221.09	266.088	1	5.19102	0.367833	132510	134253	136777	138671	139744	142478	172490	164850	158348	177613	176966	129810	136608	146579	151622	140580	84383.4	102577	100759	76082	90518.8	109074	150106	180112	184022	175151		-1.87152	5.74e-06	1.28e-05
8.01_693.1211m/z	L3	HMDB0059594 | HMDB0011617 | HMDB0003540 | HMDB0001044 | HMDB0000045	2-hydroxy-dAMP | Adenosine 2'-phosphate | 3'-AMP | 2'-Deoxyguanosine 5'-monophosphate | Adenosine monophosphate	5	Endogenous	HMDB0059594|HMDB0011617|HMDB0003540|HMDB0001044|HMDB0000045	2-hydroxy-dAMP|Adenosine 2'-phosphate|3'-AMP|2'-Deoxyguanosine 5'-monophosphate|Adenosine monophosphate	58.3|60.5|60.5|58.7|60.5	5	2M-H	C10H14N5O7P	49.2 | 49.7 | 49.7 | 49.3 | 49.7	3.10960493857015 | 3.10960493873394 | 3.10960493889772 | 3.10960493857015 | 3.10960493889772	91.4533		693.121	1	8.01478	0.402867	171029	174987	173727	176273	169963	162579	477298	500723	427327	450334	436323	191485	192900	177163	178631	165263	509949	329285	498131	463202	526475	89191.5	75175.9	79714.6	70716.9	88207.6		1.01529	0.972087	0.31913
6.21_231.1350m/z	L3	HMDB0033553 | HMDB0029065 | HMDB0029064 | HMDB0028939 | HMDB0028917	3-[(3-Methylbutyl)nitrosoamino]-2-butanone | Threoninyl-Leucine | Threoninyl-Isoleucine | Leucyl-Threonine | Isoleucyl-Threonine	5	Endogenous|Food	HMDB0033553|HMDB0029065|HMDB0029064|HMDB0028939|HMDB0028917|HMDB0013075	3-[(3-Methylbutyl)nitrosoamino]-2-butanone|Threoninyl-Leucine|Threoninyl-Isoleucine|Leucyl-Threonine|Isoleucyl-Threonine|Spermic acid 2	38.9|41.9|41.9|41.9|41.9|3.13	6	M+FA-H | M-H | M-H | M-H | M-H	C9H18N2O2 | C10H20N2O4 | C10H20N2O4 | C10H20N2O4 | C10H20N2O4	47.3 | 47.6 | 47.6 | 47.6 | 47.6	0.0215595028708257 | 0.0172814576707165 | 0.0172814576707165 | 0.0172814576707165 | 0.0172814576707165	97.6156914756894 | 96.0342852074729 | 96.0342852074729 | 96.0342852074729 | 96.0342852074729		231.135	1	6.20788	0.302683	6255.72	6289.48	6184.99	5862.64	5835.47	6245.61	1930.91	2396.85	3241.09	2431.49	1717.47	3482.71	4043.82	4958.45	3233.47	4825.17	7172.43	6344.92	7167.12	7655.67	6921.14	12623.4	10309.6	13229.2	12195.2	11785.8		3.0092	9.04e-06	1.87e-05
2.21_243.1035m/z	L3	HMDB0124830 | HMDB0039497 | HMDB0038399 | HMDB0035596 | HMDB0030691	3-[4-hydroxy-2-methoxy-3-(3-methylbut-2-en-1-yl)phenyl]prop-2-enoic acid | Dihydrowyerol | Enokipodin D | Armexifolin | Dihydrosuberenol	5	Endogenous|Food	HMDB0135363|HMDB0124830|HMDB0039497|HMDB0038548|HMDB0038399|HMDB0035596|HMDB0034723|HMDB0032641|HMDB0032078|HMDB0031925|HMDB0030731|HMDB0030691|HMDB0030636|HMDB0030549	2-(1-hydroxy-3-phenylpropyl)benzene-1,4-diol|3-[4-hydroxy-2-methoxy-3-(3-methylbut-2-en-1-yl)phenyl]prop-2-enoic acid|Dihydrowyerol|Glandulone B|Enokipodin D|Armexifolin|Encelin|Batatasin IV|Dibenzyl ether|5-Hydroxy-2-(5-methyl-1-oxo-4-hexenyl)benzofuran|3-(1,1-Dimethylallyl)herniarin|Dihydrosuberenol|Batatasin III|5,6-Dihydro-4-methoxy-6-[2-(4-methoxyphenyl)ethyl]-2H-pyran-2-one	20.3|58.8|49.1|0|45.4|60.1|11.5|20.3|10.8|20.3|11.1|59.1|20.3|11.2	14	M-H2O-H	C15H18O4	48 | 46.1 | 45.3 | 48.3 | 48.1	2.98380684619009 | 2.98380684619009 | 2.98380684619009 | 2.98380684597323 | 2.98380684619009	84.8676		243.103	1	2.20745	0.15765	3098.48	3462.36	3297.38	3277.81	3305.38	2627.34	3620.72	4704.26	3892.12	3713.8	4277.88	1698.44	1510.13	1496.62	1351.81	1331.54	5520.11	1743.68	4082.46	3793.29	4000.37	6116.89	1919.15	2668.13	4573.72	6068.92		-1.05584	0.581485	0.219349
8.22_205.0828m/z	L3	HMDB0031411 | HMDB0029070 | HMDB0029049 | HMDB0028680 | HMDB0003459	4-Acetamido-2-aminobutanoic acid | Threoninyl-Serine | Serylthreonine | Alanyl-Alanine | D-Alanyl-D-alanine	5	Endogenous|Food	HMDB0031411|HMDB0029070|HMDB0029049|HMDB0028680|HMDB0003459	4-Acetamido-2-aminobutanoic acid|Threoninyl-Serine|Serylthreonine|Alanyl-Alanine|D-Alanyl-D-alanine	29.4|33.8|33.6|21.7|21.7	5	M+FA-H | M-H | M-H | M+FA-H | M+FA-H	C6H12N2O3 | C7H14N2O5 | C7H14N2O5 | C6H12N2O3 | C6H12N2O3	44 | 44.7 | 44.7 | 42.5 | 42.5	-1.46790737123918 | -1.1402328931718 | -1.1402328931718 | -1.46790737123918 | -1.46790737123918	92.4121412964734 | 90.9999978310221 | 90.9999978310221 | 92.4121412964734 | 92.4121412964734		205.083	1	8.2206	0.24085	14831	15080.1	14815.9	14337.5	14083.3	14142.9	14523.4	15497.4	14905	15053.1	10824.1	6071.06	6169.11	6824.99	5493.15	6548.61	23203.1	26656.7	21402.2	21396	19537.8	18254.4	17850.2	21386.7	18798.7	15684.2		1.58462	0.00056831	0.000642172
3.00_155.0457m/z	L3	HMDB0062719 | HMDB0002320 | HMDB0001014 | HMDB0000854 | HMDB0000544	5-(2-carboxylatoethyl)-4-oxo-4,5-dihydro-1H-imidazol-5-ide | Imidazolelactic acid | 4-Imidazolone-5-propionic acid | Formiminoglutamic acid | 5-Hydroxymethyl-4-methyluracil	5	Endogenous	HMDB0062719|HMDB0006028|HMDB0002320|HMDB0001014|HMDB0000854|HMDB0000544	5-(2-carboxylatoethyl)-4-oxo-4,5-dihydro-1H-imidazol-5-ide|N-Acetylasparagine|Imidazolelactic acid|4-Imidazolone-5-propionic acid|Formiminoglutamic acid|5-Hydroxymethyl-4-methyluracil	21.2|13.7|30|21.2|22.4|30.6	6	M-H | M-H | M-H | M-H2O-H | M-H	C6H8N2O3 | C6H8N2O3 | C6H8N2O3 | C6H10N2O4 | C6H8N2O3	42.5 | 44.2 | 42.5 | 42.7 | 44.3	-3.60910881403644 | -3.60910881403644 | -3.60910881421856 | -3.23564637185687 | -3.60910881421856	95.3026825688864 | 95.3026825688864 | 95.3026825688864 | 95.0646378733276 | 95.3026825688864		155.046	1	2.99618	0.2496	2263.62	2364.77	2357.75	2315.56	2274.12	2205.13	47.3646	69.0983	70.3938	93.4359	32.4959	37.4828	76.451	3978.49	27.2262	46.9572	1542.89	9954.63	3768.62	4919.06	1978.03	2898.86	4842.01	5145.1	5430.89	484.63		70.8569	4.74e-06	1.1e-05
8.33_260.0890m/z	L3	HMDB0029144 | HMDB0028814 | HMDB0028767 | HMDB0028751 | HMDB0028730	gamma-Glutamylasparagine | Glutamylasparagine | Aspartyl-Gamma-glutamate | Aspartyl-Glutamine | Asparaginyl-Glutamic acid	5	Endogenous	HMDB0029144|HMDB0028814|HMDB0028793|HMDB0028767|HMDB0028751|HMDB0028730	gamma-Glutamylasparagine|Glutamylasparagine|Glutaminylaspartic acid|Aspartyl-Gamma-glutamate|Aspartyl-Glutamine|Asparaginyl-Glutamic acid	66.4|66.4|45.8|66.3|66.2|64.2	6	M-H	C9H15N3O6	52.1 | 52.1 | 52.1 | 52 | 51.7	0.834922	95.0616		260.089	1	8.33007	0.275883	10881.9	10728.5	11025.6	12447.6	13553.9	15672.3	6933.44	6245.73	9464.82	7979.38	5378.81	9111.38	11740.9	10602.8	9826.21	13913.3	12881.9	13536.9	9526.36	9733.07	10969.3	18096.1	18406.5	21259.2	18607.6	16463.1		1.57345	0.00505719	0.00412762
8.91_260.0891m/z	L3	HMDB0029144 | HMDB0028814 | HMDB0028767 | HMDB0028751 | HMDB0028730	gamma-Glutamylasparagine | Glutamylasparagine | Aspartyl-Gamma-glutamate | Aspartyl-Glutamine | Asparaginyl-Glutamic acid	5	Endogenous	HMDB0029144|HMDB0028814|HMDB0028793|HMDB0028767|HMDB0028751|HMDB0028730	gamma-Glutamylasparagine|Glutamylasparagine|Glutaminylaspartic acid|Aspartyl-Gamma-glutamate|Aspartyl-Glutamine|Asparaginyl-Glutamic acid	62.2|59.6|46.8|62.2|59.2|56.4	6	M-H	C9H15N3O6	51.3 | 50.8 | 51.3 | 50.7 | 50.2	1.07413	95.6466		260.089	1	8.91273	0.311367	9417.56	9891.83	9779.53	9994.86	10011.4	8649.57	7630.38	7751.22	7569.72	8104.24	7353.63	6774.53	7502.26	7431.01	7371.38	8043.27	9562.44	9983.06	8379.93	11551.5	11105.4	14621.5	12548.8	13403.9	12642	11821.6		1.31693	0.00186593	0.00177437
8.68_260.0891m/z	L3	HMDB0029144 | HMDB0028814 | HMDB0028767 | HMDB0028751 | HMDB0028730	gamma-Glutamylasparagine | Glutamylasparagine | Aspartyl-Gamma-glutamate | Aspartyl-Glutamine | Asparaginyl-Glutamic acid	5	Endogenous	HMDB0029144|HMDB0028814|HMDB0028793|HMDB0028767|HMDB0028751|HMDB0028730	gamma-Glutamylasparagine|Glutamylasparagine|Glutaminylaspartic acid|Aspartyl-Gamma-glutamate|Aspartyl-Glutamine|Asparaginyl-Glutamic acid	72.5|67.2|52.7|72.5|67.4|58.3	6	M-H	C9H15N3O6	53.4 | 52.4 | 53.4 | 52.4 | 50.6	1.02895	95.8235		260.089	1	8.68477	0.267367	17870.8	18583.6	18307.3	17542.6	17066.6	15645	9349.88	9764.04	9514.43	9911.29	11988.2	17174.6	18229.9	18275.3	18589.8	17107.4	18828.7	17290.2	16578.5	21461.3	19536.3	25894	21658.3	24056.5	23497.4	23052.5		1.85432	1.11e-05	2.2e-05
8.29_233.0779m/z	L3	HMDB0029158 | HMDB0029038 | HMDB0028842 | HMDB0028828 | HMDB0011173	gamma-Glutamylserine | Serylglutamic acid | Glycyl-Hydroxyproline | Glutamylserine | L-glycyl-L-hydroxyproline	5	Endogenous	HMDB0038850|HMDB0029158|HMDB0029057|HMDB0029038|HMDB0028842|HMDB0028828|HMDB0028763|HMDB0012249|HMDB0011173|HMDB0011169|HMDB0006454|HMDB0006029|HMDB0000532	Cycasin|gamma-Glutamylserine|Threoninyl-Aspartate|Serylglutamic acid|Glycyl-Hydroxyproline|Glutamylserine|Aspartyl-Threonine|L-Aspartate-semialdehyde|L-glycyl-L-hydroxyproline|L-beta-aspartyl-L-threonine|L-2-Amino-3-oxobutanoic acid|N-Acetylglutamine|Acetylglycine	32.6|56.4|32|49.3|63.1|53.4|39.3|38.8|63.1|38.2|29.1|44.6|28.8	13	M-H | M-H | M+FA-H | M-H | M+FA-H	C8H14N2O6 | C8H14N2O6 | C7H12N2O4 | C8H14N2O6 | C7H12N2O4	49.2 | 47.8 | 50.9 | 48.6 | 50.9	0.0215766762978037 | 0.0215766762978037 | 0.0268611664271335 | 0.0215766762978037 | 0.0268611664271335	89.8465847563918 | 89.8465847563918 | 91.3411788037397 | 89.8465847563918 | 91.3411788037397		233.078	1	8.29067	0.210183	29701.1	28044.9	29678.7	33561.1	35462	39276.8	23485.3	21284.4	28513.1	25830.7	20587.2	24818	31924.6	28080.8	28532.7	39882.2	33171.6	35405.8	26686.1	25966.6	29660	39947.4	45145.1	50539.7	45433.3	38378.7		1.26056	0.026304	0.0168138
8.52_247.0937m/z	L3	HMDB0029159 | HMDB0029060 | HMDB0028856 | HMDB0028829 | HMDB0028688	gamma-Glutamylthreonine | Threoninyl-Glutamate | Hydroxyprolyl-Alanine | Glutamylthreonine | Alanyl-Hydroxyproline	5	Endogenous	HMDB0034266|HMDB0029159|HMDB0029060|HMDB0029047|HMDB0029026|HMDB0028856|HMDB0028829|HMDB0028688	L-Coprine|gamma-Glutamylthreonine|Threoninyl-Glutamate|Serylproline|Prolyl-Serine|Hydroxyprolyl-Alanine|Glutamylthreonine|Alanyl-Hydroxyproline	31.6|51.2|47.8|27.7|29.9|51.2|50.6|54.7	8	M-H | M-H | M+FA-H | M-H | M+FA-H	C9H16N2O6 | C9H16N2O6 | C8H14N2O4 | C9H16N2O6 | C8H14N2O4	49.2 | 48.5 | 49.5 | 49.1 | 50.2	0.492785469977753 | 0.492785469977753 | 0.604970589434707 | 0.492785469977753 | 0.604970589434707	95.3375677874928 | 95.3375677874928 | 96.9333620863087 | 95.3375677874928 | 96.9333620863087		247.094	1	8.51837	0.267117	7793.22	8420	7986.95	7800.24	7788.23	7546.73	5136.01	5150.33	5295.28	5370.88	10630	10845.6	11539.8	9986.85	12396.5	10658.7	7453.64	6973.32	10677.2	7384.67	7863.16	7936.09	5677.63	5812.89	6954.66	7047.49		1.27767	0.120946	0.0614092
7.94_247.0937m/z	L3	HMDB0029159 | HMDB0029060 | HMDB0028856 | HMDB0028829 | HMDB0028688	gamma-Glutamylthreonine | Threoninyl-Glutamate | Hydroxyprolyl-Alanine | Glutamylthreonine | Alanyl-Hydroxyproline	5	Endogenous	HMDB0034266|HMDB0029159|HMDB0029060|HMDB0029047|HMDB0029026|HMDB0028856|HMDB0028829|HMDB0028688	L-Coprine|gamma-Glutamylthreonine|Threoninyl-Glutamate|Serylproline|Prolyl-Serine|Hydroxyprolyl-Alanine|Glutamylthreonine|Alanyl-Hydroxyproline	37.8|54|49.9|25.2|36.4|56.6|53.4|61.5	8	M-H | M-H | M+FA-H | M-H | M+FA-H	C9H16N2O6 | C9H16N2O6 | C8H14N2O4 | C9H16N2O6 | C8H14N2O4	49.8 | 49 | 50.6 | 49.7 | 51.6	0.402907174787404 | 0.402907174787404 | 0.494632180207772 | 0.402907174787404 | 0.494632180207772	95.46143393987 | 95.46143393987 | 97.0593015546343 | 95.46143393987 | 97.0593015546343		247.094	1	7.93597	0.306517	12533.5	11778.8	12900	14954	15777.7	18164.1	5110.31	5804.66	8287.28	7463.5	3949.4	10709	16287.5	10483.5	10409.9	17505.9	27556.9	8381.84	19319.5	15729.2	25137.4	44159.5	13206	18310.6	16110.9	40253.3		3.13978	0.00230978	0.0021142
6.13_173.0927m/z	L3	HMDB0094702 | HMDB0034365 | HMDB0029127 | HMDB0028854 | HMDB0003357	Gly-Norvaline | L-Theanine | Valyl-Glycine | Glycyl-Valine | N-Acetylornithine	5	Endogenous|Food	HMDB0094702|HMDB0034365|HMDB0029127|HMDB0028854|HMDB0003357	Gly-Norvaline|L-Theanine|Valyl-Glycine|Glycyl-Valine|N-Acetylornithine	45.4|37.2|36.3|36.3|36.3	5	M-H	C7H14N2O3	47.6 | 45.9 | 45.7 | 45.7 | 45.7	-2.59432	95.5325		173.093	1	6.13327	0.19285	1830.84	1791.14	1738.35	1692.97	1670.36	1888.59	2017.16	2429.49	3109.24	2346.15	2346.75	1551.86	1197.73	958.072	1565.54	1582.95	1321.73	1441.91	939.382	1226.32	2040.82	2433.13	2271.63	2302.22	1565.68	1837.52		-1.75732	0.00357369	0.00307982
6.48_173.0927m/z	L3	HMDB0094702 | HMDB0034365 | HMDB0029127 | HMDB0028854 | HMDB0003357	Gly-Norvaline | L-Theanine | Valyl-Glycine | Glycyl-Valine | N-Acetylornithine	5	Endogenous|Food	HMDB0094702|HMDB0034365|HMDB0029127|HMDB0028854|HMDB0003357	Gly-Norvaline|L-Theanine|Valyl-Glycine|Glycyl-Valine|N-Acetylornithine	30.8|20.1|20.1|32.3|31.1	5	M-H	C7H14N2O3	45 | 42.8 | 42.8 | 45.3 | 45	-2.5542	97.0867		173.093	1	6.48463	0.3206	5737.5	6011.96	6111.39	6056.62	6000.68	5356.64	1552.22	1634.08	1682.71	1662.48	1815.13	2855.8	3253.98	3378.67	3042.97	3521.56	11211.6	9038.04	10129.9	11144.4	9805.39	11204.5	8394.18	8244.3	7563.26	9287.48		6.14971	2.57e-10	9.3e-09
7.75_175.0720m/z	L3	HMDB0029396 | HMDB0029061 | HMDB0029032 | HMDB0028851 | HMDB0028696	L-cis-3-Amino-2-pyrrolidinecarboxylic acid | Threoninyl-Glycine | Serylalanine | Glycyl-Threonine | Alanyl-Serine	5	Endogenous|Food	HMDB0030405|HMDB0029396|HMDB0029061|HMDB0029032|HMDB0028851|HMDB0028696	D-1-Amino-2-pyrrolidinecarboxylic acid|L-cis-3-Amino-2-pyrrolidinecarboxylic acid|Threoninyl-Glycine|Serylalanine|Glycyl-Threonine|Alanyl-Serine	3.17|29|24.1|15.7|22.3|18	6	M+FA-H | M-H | M-H | M-H | M-H	C5H10N2O2 | C6H12N2O4 | C6H12N2O4 | C6H12N2O4 | C6H12N2O4	43.7 | 42.7 | 41 | 42.3 | 41.5	-3.44958023638025 | -2.54829334211688 | -2.54829334211688 | -2.54829334211688 | -2.54829334211688	93.6978301826843 | 92.2587648597377 | 92.2587648597377 | 92.2587648597377 | 92.2587648597377		175.072	1	7.74758	0.240917	8499.01	8738.72	8821.52	8991.57	9112.57	8552.83	19023.1	21562.3	21769.2	20921.9	23493.1	6763.46	6715.5	5646.24	6144.73	5597.46	7227.46	5341.07	7639.65	5781.05	6241.69	4947.82	4030.08	4644.56	4709.99	5284.19		-3.31265	2.32e-07	1.04e-06
7.22_403.1840m/z	L3	HMDB0034266 | HMDB0030452 | HMDB0029047 | HMDB0028856 | HMDB0028688	L-Coprine | Blasticidin S | Serylproline | Hydroxyprolyl-Alanine | Alanyl-Hydroxyproline	5	Endogenous|Food	HMDB0034266|HMDB0030452|HMDB0029047|HMDB0029026|HMDB0028856|HMDB0028688	L-Coprine|Blasticidin S|Serylproline|Prolyl-Serine|Hydroxyprolyl-Alanine|Alanyl-Hydroxyproline	47.3|47.3|46.9|44.3|56.5|61.3	6	2M-H | M-H2O-H | 2M-H | 2M-H | 2M-H	C8H14N2O4 | C17H26N8O5 | C8H14N2O4 | C8H14N2O4 | C8H14N2O4	47.8 | 47.6 | 47.7 | 49.6 | 50.6	1.47264377814883 | -1.7578750388559 | 1.47264377828946 | 1.47264377828946 | 1.47264377828946	93.3244598118181 | 92.689748794481 | 93.3244598118181 | 93.3244598118181 | 93.3244598118181		403.184	1	7.2172	0.28515	19867.8	22784.5	22864.8	23192.5	23930.6	17345	7017.64	7884.87	8652.12	9562.11	6489.01	22674.3	31893.3	35044.6	23081.1	36508.4	16174.4	11340.1	11883.7	15701	14012.3	36122.7	32446.4	50193.6	40617.6	33083.3		1.74499	0.000531422	0.000610819
7.28_260.1255m/z	L3	HMDB0028947 | HMDB0028758 | HMDB0004987 | HMDB0004985 | HMDB0002248	Lysyl-Aspartate | Aspartyl-Lysine | Aspartyllysine | N6-beta-Aspartyllysine | Gamma glutamyl ornithine	5	Endogenous|Food	HMDB0028947|HMDB0028758|HMDB0004987|HMDB0004985|HMDB0002248	Lysyl-Aspartate|Aspartyl-Lysine|Aspartyllysine|N6-beta-Aspartyllysine|Gamma glutamyl ornithine	23.3|27.4|27.4|29|20	5	M-H	C10H19N3O5	42 | 42.8 | 42.8 | 43.1 | 41.3	1.04745045637534 | 1.04745045637534 | 1.04745045637534 | 1.04745045637534 | 1.04745045615766	87.802		260.125	1	7.2789	0.250133	19609.9	21062.4	20970	20809.3	21433.7	17806.1	8093.97	9138.76	9688.01	9971.81	7680.19	18767.8	24392.1	25196.9	19172.6	25063.1	18163.9	17076.7	15754.7	18292.4	15911.1	30836.8	28796.3	36610	32023.8	29384.8		1.91146	4.47e-06	1.05e-05
9.55_260.1255m/z	L3	HMDB0028947 | HMDB0028758 | HMDB0004987 | HMDB0004985 | HMDB0002248	Lysyl-Aspartate | Aspartyl-Lysine | Aspartyllysine | N6-beta-Aspartyllysine | Gamma glutamyl ornithine	5	Endogenous|Food	HMDB0028947|HMDB0028758|HMDB0004987|HMDB0004985|HMDB0002248	Lysyl-Aspartate|Aspartyl-Lysine|Aspartyllysine|N6-beta-Aspartyllysine|Gamma glutamyl ornithine	46.1|45.1|45.1|45.1|41.5	5	M-H	C10H19N3O5	48.1 | 47.9 | 47.9 | 47.9 | 47.1	1.0727770853307 | 1.0727770853307 | 1.0727770853307 | 1.0727770853307 | 1.07277708511302	95.5813		260.125	1	9.54858	0.311683	8143.44	8654.36	8866.69	9026.99	8802.23	8043.69	5023.42	5003.55	5440.35	5572.81	5129.45	8351.36	9111.99	9359.16	8761.69	10239.8	11828	10925.6	9912.45	11324.4	10692.2	12878.8	11507.9	13740.1	12673.7	11716.8		2.08955	4.05e-08	2.99e-07
7.59_242.1147m/z	L3	HMDB0028947 | HMDB0028758 | HMDB0004987 | HMDB0004985 | HMDB0002248	Lysyl-Aspartate | Aspartyl-Lysine | Aspartyllysine | N6-beta-Aspartyllysine | Gamma glutamyl ornithine	5	Endogenous|Food	HMDB0029422|HMDB0029031|HMDB0029015|HMDB0028947|HMDB0028805|HMDB0028758|HMDB0004987|HMDB0004985|HMDB0002248	L-Histidine trimethylbetaine|Prolyl-Gamma-glutamate|Prolyl-Glutamine|Lysyl-Aspartate|Glutaminylproline|Aspartyl-Lysine|Aspartyllysine|N6-beta-Aspartyllysine|Gamma glutamyl ornithine	22|38.9|38.8|53.4|38.5|52.5|52.5|52.4|57.3	9	M-H2O-H	C10H19N3O5	49.5 | 49.3 | 49.3 | 49.3 | 50.3	0.325183975124366 | 0.325183975124366 | 0.325183975124366 | 0.325183975124366 | 0.325183974906686	94.6186		242.115	1	7.59432	0.28465	21825.1	21623.9	21406.9	21254.8	21525.3	20969.5	32140.2	30505.4	33638.9	34778.6	34235.2	31703.2	36302.8	31132.3	34563.9	33372.3	13413.5	13075.4	12817.8	12536.7	12111.1	16459.3	15744.8	15626.8	14675.5	19017.5		-2.58462	9.65e-10	2.2e-08
7.45_171.0771m/z	L3	HMDB0039222 | HMDB0031412 | HMDB0011178 | HMDB0001370 | HMDB0000721	N-(gamma-Glutamyl)ethanolamine | 2-Amino-4-[(2-hydroxy-1-oxopropyl)amino]butanoic acid | Prolylglycine | Diaminopimelic acid | Glycylproline	5	Endogenous|Food	HMDB0039222|HMDB0031412|HMDB0029054|HMDB0028697|HMDB0011178|HMDB0001370|HMDB0000721	N-(gamma-Glutamyl)ethanolamine|2-Amino-4-[(2-hydroxy-1-oxopropyl)amino]butanoic acid|Threoninyl-Alanine|Alanyl-Threonine|Prolylglycine|Diaminopimelic acid|Glycylproline	7.26|6.31|4|4|6.61|6.31|21.2	7	M-H2O-H | M-H2O-H | M-H | M-H2O-H | M-H	C7H14N2O4 | C7H14N2O4 | C7H12N2O3 | C7H14N2O4 | C7H12N2O3	40.2 | 40 | 40 | 40 | 43	-2.38660340087298 | -2.3866034010225 | -2.63641266257574 | -2.38660340087298 | -2.63641266257574	96.5094248444296 | 96.5094248444296 | 96.749019938762 | 96.5094248444296 | 96.749019938762		171.077	1	7.44982	0.368367	8171.46	8448.31	8305.43	8073.55	8356.12	7787.41	899.975	899.062	937.578	1004.2	986.45	1928.23	2121.65	2167.15	1946.38	2191.29	18019	17483.9	16850.9	18185	17281	16111.7	14092	14022.9	13445.9	12845.7		18.5773	5.53e-14	7.9e-12
5.48_292.1042m/z	L3	HMDB0060493 | HMDB0034085 | HMDB0033699 | HMDB0029354 | HMDB0029353	N-Acetylmuramate | (3R)-3,4-Dihydroxy-3-(hydroxymethyl)butanenitrile 4-glucoside | Linamarin | 4-Hydroxyproline galactoside | Galactosyl 4-hydroxyproline	5	Endogenous|Food	HMDB0062592|HMDB0060493|HMDB0034085|HMDB0033699|HMDB0029354|HMDB0029353|HMDB0004824|HMDB0002095|HMDB0001961	O-malonyl-L-carnitine|N-Acetylmuramate|(3R)-3,4-Dihydroxy-3-(hydroxymethyl)butanenitrile 4-glucoside|Linamarin|4-Hydroxyproline galactoside|Galactosyl 4-hydroxyproline|N2,N2-Dimethylguanosine|Malonylcarnitine|1,7-Dimethylguanosine	0.234|42.2|42.3|36.6|42.3|42.4|26.1|0.234|26.6	9	M-H | M-H | M+FA-H | M-H | M-H	C11H19NO8 | C11H19NO8 | C10H17NO6 | C11H19NO8 | C11H19NO8	47.6 | 47.6 | 46.7 | 47.6 | 47.6	1.51329802967752 | 1.51329802987145 | 1.79504504294878 | 1.51329802967752 | 1.51329802967752	97.5451477550853 | 97.5451477550853 | 99.0941890001952 | 97.5451477550853 | 97.5451477550853		292.104	1	5.47607	0.21955	69079.3	69760.1	67531.5	67238	66817.6	63932.1	105795	98830.1	95245.5	105321	118205	82622.4	77599.3	76573.8	91778.5	80232.4	28048.5	29122.2	33406.5	24034.3	26945.1	52655.7	48630.5	50936.2	59481.6	60056.5		-3.69744	3.82e-08	2.91e-07
3.02_274.0936m/z	L3	HMDB0060493 | HMDB0034085 | HMDB0030697 | HMDB0029354 | HMDB0029353	N-Acetylmuramate | (3R)-3,4-Dihydroxy-3-(hydroxymethyl)butanenitrile 4-glucoside | Sarmentosin | 4-Hydroxyproline galactoside | Galactosyl 4-hydroxyproline	5	Endogenous|Food	HMDB0060493|HMDB0034085|HMDB0030697|HMDB0029354|HMDB0029353|HMDB0001786	N-Acetylmuramate|(3R)-3,4-Dihydroxy-3-(hydroxymethyl)butanenitrile 4-glucoside|Sarmentosin|4-Hydroxyproline galactoside|Galactosyl 4-hydroxyproline|Ethenodeoxyadenosine	79.2|74.1|71.2|81.9|72.5|50.6	6	M-H2O-H | M-H2O-H | M-H | M-H2O-H | M-H2O-H	C11H19NO8 | C11H19NO8 | C11H17NO7 | C11H19NO8 | C11H19NO8	55.2 | 54.2 | 53.6 | 55.7 | 53.9	1.25066264115117 | 1.2506626413451 | 1.33252668836683 | 1.25066264115117 | 1.25066264115117	98.2521601101164 | 98.2521601101164 | 98.5098405829377 | 98.2521601101164 | 98.2521601101164		274.094	1	3.02245	0.3547	1.0257e+06	1.06163e+06	1.04234e+06	1.05747e+06	1.0584e+06	997056	1.04981e+06	881112	862476	1.03705e+06	873335	1.06607e+06	1.0935e+06	1.15199e+06	1.16167e+06	1.14352e+06	1.06539e+06	1.4551e+06	1.1409e+06	864089	885402	803453	1.15371e+06	1.20799e+06	1.23476e+06	1.21128e+06		1.15033	0.264517	0.11794
4.61_160.0610m/z	L3	HMDB0062557 | HMDB0030091 | HMDB0029423 | HMDB0002030 | HMDB0001514	N-Acetylthreonine | beta-D-Glucosamine | Acetylhomoserine | Fructosamine | Glucosamine	5	Endogenous|Food	HMDB0094716|HMDB0062660|HMDB0062557|HMDB0061715|HMDB0034208|HMDB0033747|HMDB0030409|HMDB0030091|HMDB0029423|HMDB0012880|HMDB0003411|HMDB0002030|HMDB0001514|HMDB0000510|HMDB0000162	hydroxybutyrylglycine|N-methyl-L-glutamic Acid|N-Acetylthreonine|Glutamate, gamma-methyl ester|Pterolactam|(Â±)-2,2'-Iminobispropanoic acid|4-Amino-2-methylenebutanoic acid|beta-D-Glucosamine|Acetylhomoserine|Acetamidopropanal|D-Proline|Fructosamine|Glucosamine|Aminoadipic acid|L-Proline	37.6|32.7|64.3|34.3|39.3|31|26.9|64.2|61.9|35.2|31.1|56.7|64.2|32.7|31.1	15	M-H | M-H2O-H | M-H | M-H2O-H | M-H2O-H	C6H11NO4 | C6H13NO5 | C6H11NO4 | C6H13NO5 | C6H13NO5	51.6 | 51.6 | 51.1 | 50.1 | 51.6	-3.09503030440744 | -2.7837295514681 | -3.09503030458389 | -2.7837295514681 | -2.7837295514681	97.2763285129664 | 97.0332723955357 | 97.2763285129664 | 97.0332723955357 | 97.0332723955357		160.061	1	4.61283	0.289017	8547.09	8903.86	8504.95	7433	7247.08	6033.73	3916.46	4559.8	3693.85	3961.16	4292.51	10352.6	12052.5	12667.2	10468.4	10743.4	5887.61	5064.8	5865.44	6697.46	5201.8	9029.43	8161.77	9712.93	9165.68	8896.25		1.40606	0.000618418	0.000689703
4.78_199.0722m/z	L3	HMDB0036301 | HMDB0029040 | HMDB0028686 | HMDB0006248 | HMDB0003764	N-gamma-L-Glutamyl-D-alanine | Serinyl-Hydroxyproline | Alanyl-Glutamic acid | gamma-Glutamylalanine | Glutamylalanine	5	Endogenous|Food	HMDB0036301|HMDB0029040|HMDB0028872|HMDB0028686|HMDB0006248|HMDB0003764	N-gamma-L-Glutamyl-D-alanine|Serinyl-Hydroxyproline|Hydroxyprolyl-Serine|Alanyl-Glutamic acid|gamma-Glutamylalanine|Glutamylalanine	62.1|63.6|43.6|54.9|62.1|62	6	M-H2O-H	C8H14N2O5	50.2 | 50.5 | 48.7 | 50.2 | 50.1	-1.04984	90.0031		199.072	1	4.77923	0.249617	43034.9	49394.3	50297.8	51487	52472.3	38725.3	22071.1	20721.9	20645.5	24871.5	22669.3	65719.7	81728	82732.4	72814.9	95114.6	34428.3	27999.8	26933.5	33931.7	29628.4	72857.9	62577.2	84333.3	73813.1	70160.7		1.37793	0.000762009	0.000817716
2.93_199.0722m/z	L3	HMDB0036301 | HMDB0029040 | HMDB0028686 | HMDB0006248 | HMDB0003764	N-gamma-L-Glutamyl-D-alanine | Serinyl-Hydroxyproline | Alanyl-Glutamic acid | gamma-Glutamylalanine | Glutamylalanine	5	Endogenous|Food	HMDB0036301|HMDB0029040|HMDB0028872|HMDB0028686|HMDB0006248|HMDB0003764	N-gamma-L-Glutamyl-D-alanine|Serinyl-Hydroxyproline|Hydroxyprolyl-Serine|Alanyl-Glutamic acid|gamma-Glutamylalanine|Glutamylalanine	41.4|43.5|31.7|49.1|41.4|50.4	6	M-H2O-H	C8H14N2O5	46 | 46.5 | 47.6 | 46 | 47.8	-1.06917	90.0453		199.072	1	2.9305	0.324367	18350.5	18374.4	18537.3	17899.5	18293.2	17102	12192.6	12215.3	13188.9	13177	12193.5	21078.4	24380.6	24463.5	21766.4	24504.6	14935.1	13690.8	13333.9	14965.6	13483.3	22715.8	20616.8	23111.5	22693.3	21138.4		1.11818	0.00792569	0.00609184
1.46_673.4837m/z	L3	HMDB0114924 | HMDB0114899 | HMDB0031130 | HMDB0007859 | HMDB0007858	PA(18:1(9Z)/16:0) | PA(18:1(11Z)/16:0) | 9-Octadecenoic acid 1-[[(1-oxohexadecyl)oxy]methyl]-2-(phosphonoxy)ethyl ester | PA(16:0/18:1(9Z)) | PA(16:0/18:1(11Z))	5	Endogenous|Food	HMDB0115091|HMDB0115062|HMDB0114924|HMDB0114899|HMDB0114877|HMDB0056293|HMDB0031130|HMDB0007859|HMDB0007858	PA(20:1(11Z)/14:0)|PA(20:0/14:1(9Z))|PA(18:1(9Z)/16:0)|PA(18:1(11Z)/16:0)|PA(18:0/16:1(9Z))|DG(18:2n6/0:0/20:5n3)|9-Octadecenoic acid 1-[[(1-oxohexadecyl)oxy]methyl]-2-(phosphonoxy)ethyl ester|PA(16:0/18:1(9Z))|PA(16:0/18:1(11Z))	0.163|0.163|57.5|57.5|33.5|0|57.5|57.5|57.5	9	M-H	C37H71O8P	48.5	3.45414410866283 | 3.45414410866283 | 3.45414410899993 | 3.45414410883138 | 3.45414410883138	89.1142		673.484	1	1.46302	0.398483	33698.6	32230.6	27260.4	22026	19886	19252.1	34441.5	49548.2	45591.9	41050.1	40811.2	24199	34980.5	38633.6	28737.7	33925.7	20889.4	37144.2	39592.3	38562.7	32498.1	18957.2	63449.9	63102	75081	36054		-1.25346	0.104712	0.0546051
7.93_173.0563m/z	L3	HMDB0062558 | HMDB0029874 | HMDB0029048 | HMDB0006028 | HMDB0003609	Pyroglutamine | Squamolone | Serylserine | N-Acetylasparagine | 2-Aminoacrylic acid	5	Endogenous|Food	HMDB0062558|HMDB0039426|HMDB0031547|HMDB0029874|HMDB0029048|HMDB0006028|HMDB0003609|HMDB0000854|HMDB0000079	Pyroglutamine|3-Isoxazolidinone|L-Cyclo(alanylglycyl)|Squamolone|Serylserine|N-Acetylasparagine|2-Aminoacrylic acid|Formiminoglutamic acid|Dihydrothymine	30.2|0|8.69|26.6|25.6|27.8|24.3|0|8.71	9	M+FA-H | M+FA-H | M-H2O-H | M-H | 2M-H	C5H8N2O2 | C5H8N2O2 | C6H12N2O5 | C6H10N2O4 | C3H5NO2	44.4 | 43.7 | 43.5 | 43.9 | 44	-4.13993092909347 | -4.13993092931541 | -2.76012844213061 | -3.04574612065146 | -3.04574612048818	96.7697320052025 | 96.7697320052025 | 95.0459541007922 | 95.2833902280148 | 99.2579199455251		173.056	1	7.9272	0.153267	1689.18	1593.79	1613.68	1703.3	1683.04	1765.91	3780.88	3697.15	3620.97	3747.59	3090.59	3077.9	2897.68	2600.81	2810.19	2681.97	1983.01	655.579	2286.05	967.266	1473.4	1203.35	359.106	496.522	649.231	1718.93		-2.43536	0.00292433	0.00259151
7.64_173.0563m/z	L3	HMDB0062558 | HMDB0029874 | HMDB0029048 | HMDB0006028 | HMDB0003609	Pyroglutamine | Squamolone | Serylserine | N-Acetylasparagine | 2-Aminoacrylic acid	5	Endogenous|Food	HMDB0062558|HMDB0039426|HMDB0031547|HMDB0029874|HMDB0029048|HMDB0006028|HMDB0003609|HMDB0000854|HMDB0000079	Pyroglutamine|3-Isoxazolidinone|L-Cyclo(alanylglycyl)|Squamolone|Serylserine|N-Acetylasparagine|2-Aminoacrylic acid|Formiminoglutamic acid|Dihydrothymine	45.8|0|11.9|40|38.8|42.3|36.9|1.14|13.2	9	M+FA-H | M+FA-H | M-H2O-H | M-H | 2M-H	C5H8N2O2 | C5H8N2O2 | C6H12N2O5 | C6H10N2O4 | C3H5NO2	47.4 | 46.3 | 46 | 46.7 | 46.4	-4.0489540926778 | -4.04895409289974 | -2.69947303541821 | -2.97881464455622 | -2.97881464439294	96.1266723081046 | 96.1266723081046 | 94.4143493501337 | 94.6502076533726 | 98.5983256011768		173.056	1	7.63812	0.162033	2797.63	2818.8	2878.32	2854.77	3142.26	2997.65	5338.63	4827.05	4711.09	5061.44	4504.71	4214.23	4123.28	4798.53	4077.59	3953.21	2331.92	1722.97	2755.36	1619.1	1477.11	1737.22	1230.48	1464.62	1666.45	2525.33		-2.46737	5.97e-05	9.18e-05
5.00_214.0832m/z	L3	HMDB0029053 | HMDB0029037 | HMDB0028806 | HMDB0000479 | HMDB0000001	Serinyl-Gamma-glutamate | Serylglutamine | Glutaminylserine | 3-Methylhistidine | 1-Methylhistidine	5	Endogenous	HMDB0029056|HMDB0029053|HMDB0029037|HMDB0028806|HMDB0028741|HMDB0000479|HMDB0000001	Threoninyl-Asparagine|Serinyl-Gamma-glutamate|Serylglutamine|Glutaminylserine|Asparaginyl-Threonine|3-Methylhistidine|1-Methylhistidine	11.6|41.1|36.1|34.8|12.6|34.5|34.5	7	M-H2O-H | M-H2O-H | M-H2O-H | M+FA-H | M+FA-H	C8H15N3O5 | C8H15N3O5 | C8H15N3O5 | C7H11N3O2 | C7H11N3O2	47.1 | 46.1 | 45.8 | 46.1 | 46.1	-0.347556018240765 | -0.347556018240765 | -0.347556018362693 | -0.479159558752439 | -0.479159558752439	94.7269731657404 | 94.7269731657404 | 94.7269731657404 | 96.529800055007 | 96.529800055007		214.083	1	4.99835	0.302317	4655.57	4550.09	4513.51	4492.42	4205.4	4262.01	4834.2	5068.34	4972.16	5386.2	4927.65	8049.26	9102.92	9134.86	8474.38	8880.21	3510.38	3226.86	3638.76	3530.83	3349.89	4277.97	3576	3933.82	3932.68	3993.2		-1.45964	9.06e-07	2.97e-06
7.80_228.0990m/z	L3	HMDB0029075 | HMDB0029059 | HMDB0029012 | HMDB0028807 | HMDB0028739	Threoninyl-Gamma-glutamate | Threoninyl-Glutamine | Prolyl-Asparagine | Glutaminylthreonine | Asparaginyl-Proline	5	Endogenous	HMDB0029075|HMDB0029059|HMDB0029012|HMDB0028807|HMDB0028739	Threoninyl-Gamma-glutamate|Threoninyl-Glutamine|Prolyl-Asparagine|Glutaminylthreonine|Asparaginyl-Proline	55.2|60.3|65.5|54.8|65.5	5	M-H2O-H | M-H2O-H | M-H | M-H2O-H | M-H	C9H17N3O5 | C9H17N3O5 | C9H15N3O4 | C9H17N3O5 | C9H15N3O4	49.9 | 50.9 | 52 | 49.8 | 52	-0.101760617156914 | -0.101760617156914 | -0.109779019565934 | -0.101760617271927 | -0.109779019565934	94.2982728491648 | 94.2982728491648 | 94.547082932578 | 94.2982728491648 | 94.547082932578		228.099	1	7.8046	0.162117	3153.8	3258.18	3324.18	3512.09	3487.02	3447.89	4847.67	4626.89	5310.59	5514.99	4770.03	3088.13	3572.78	2342.36	3195.06	2917.02	3460.85	2884.53	2991.54	2983.13	3360.49	3466.16	3011.01	3753.53	3291.37	4132.65		-1.59881	1.22e-05	2.39e-05
5.52_277.1196m/z	L3	HMDB0029113 | HMDB0029029 | HMDB0028996 | HMDB0011176 | HMDB0001389	Tyrosyl-Proline | Prolyl-Tyrosine | Phenylalanyl-Hydroxyproline | L-phenylalanyl-L-hydroxyproline | Melatonin	5	Endogenous|Food	HMDB0059856|HMDB0038174|HMDB0029113|HMDB0029029|HMDB0028996|HMDB0014501|HMDB0012153|HMDB0011176|HMDB0011112|HMDB0001389	Ethyl 2-pyrrolecarboxylate|5-Acetyl-2,4-dimethyloxazole|Tyrosyl-Proline|Prolyl-Tyrosine|Phenylalanyl-Hydroxyproline|Aminoglutethimide|3,4-Dihydroxybenzylamine|L-phenylalanyl-L-hydroxyproline|N1-(alpha-D-ribosyl)-5,6-dimethyl-benzimidazole|Melatonin	3.74|0|24.6|20|12.6|0|0|12.6|2.93|14.5	10	M-H | M-H | M-H | M-H | M+FA-H	C14H18N2O4 | C14H18N2O4 | C14H18N2O4 | C14H18N2O4 | C13H16N2O2	43.7 | 42.8 | 41.3 | 41.3 | 42	0.819376491773708 | 0.819376491773708 | 0.819376491773708 | 0.819376491773708 | 0.98177902880947	95.0262668018869 | 95.0262668018869 | 95.0262668018869 | 95.0262668018869 | 96.537416280664		277.12	1	5.51548	0.50865	10817.6	11054.9	11006.2	10890.6	10869.5	10175.8	5554.47	5495.69	5971.29	6017.13	5027.29	11108	12014.6	12562.1	10999.2	12420.7	10885.2	11650.5	10410.5	11123.5	10953.5	15398.8	14284.8	16677.5	15893.3	15784.3		1.9605	9.1e-08	5.01e-07
9.77_607.0833n	L3	HMDB0062760 | HMDB0060522 | HMDB0013112 | HMDB0000304 | HMDB0000290	UDP-N-acetyl-alpha-D-glucosamine(2-) | UDP-N-acetyl-alpha-D-galactosamine | UDP-N-acetyl-D-mannosamine | Uridine diphosphate-N-acetylgalactosamine | Uridine diphosphate-N-acetylglucosamine	5	Endogenous	HMDB0062760|HMDB0060522|HMDB0013112|HMDB0000304|HMDB0000290	UDP-N-acetyl-alpha-D-glucosamine(2-)|UDP-N-acetyl-alpha-D-galactosamine|UDP-N-acetyl-D-mannosamine|Uridine diphosphate-N-acetylgalactosamine|Uridine diphosphate-N-acetylglucosamine	72.1|72.1|72.1|72.1|72.1	5	M-H, M+Na-2H	C17H27N3O17P2	53.1	2.89344518444408 | 2.89344518463135 | 2.89344518463135 | 2.89344518444408 | 2.89344518444408	96.81	607.083	606.076	1	9.7683	0.416783	575667	590918	612148	667378	655844	576289	1.15285e+06	1.05047e+06	1.02141e+06	1.22405e+06	905960	364117	337651	355357	338778	362918	971107	1.22091e+06	1.04044e+06	884936	877624	374961	551063	667993	681922	696477		-1.07202	0.395112	0.161375
7.20_243.0987m/z	L3	HMDB0029439 | HMDB0029437 | HMDB0029157 | HMDB0029016 | HMDB0028864 | HMDB0028827	(2S,4S)-Pinnatanine | Nopalinic acid | gamma-Glutamylproline | Prolyl-Glutamate | Hydroxyprolyl-Hydroxyproline | Glutamylproline	6	Endogenous|Food	HMDB0029439|HMDB0029437|HMDB0029157|HMDB0029016|HMDB0028864|HMDB0028827|HMDB0014606	(2S,4S)-Pinnatanine|Nopalinic acid|gamma-Glutamylproline|Prolyl-Glutamate|Hydroxyprolyl-Hydroxyproline|Glutamylproline|Metharbital	53.1|58.8|58.4|54.6|57.1|58.5|26.6	7	M-H | M-H2O-H | M-H | M-H | M-H | M-H	C10H16N2O5 | C10H18N2O6 | C10H16N2O5 | C10H16N2O5 | C10H16N2O5 | C10H16N2O5	48.1 | 49.2 | 49.2 | 48.4 | 48.9 | 49.2	0.42827562913992 | 0.39886433169537 | 0.428275629256352 | 0.428275629256352 | 0.428275629256352 | 0.428275629256352	87.9937460358752 | 87.7626866287064 | 87.9937460358752 | 87.9937460358752 | 87.9937460358752 | 87.9937460358752		243.099	1	7.20407	0.241383	22460.6	25405.2	26398.8	29111.7	30469.3	23249.5	28135.7	22724.2	27594.3	32820.7	26251.9	32483.6	41891.5	40808	37844.7	45313.1	17049.2	16416.4	12990.3	15529.2	14169.7	24515.2	23162	31357.4	27134.1	23663.2		-1.80589	6.15e-05	9.42e-05
2.09_206.0457m/z	L3	HMDB0140926 | HMDB0131194 | HMDB0128032 | HMDB0060289 | HMDB0060026 | HMDB0031172	2-{[hydroxy(3-hydroxy-4-methoxyphenyl)methylidene]amino}acetic acid | 2-{[hydroxy(2-hydroxy-4-methoxyphenyl)methylidene]amino}acetic acid | 2-{[hydroxy(3-hydroxy-5-methoxyphenyl)methylidene]amino}acetic acid | Quinoline-4,8-diol | Vanilloylglycine | 3-Formyl-6-hydroxyindole	6	Endogenous|Food	HMDB0140926|HMDB0131194|HMDB0128032|HMDB0062696|HMDB0060328|HMDB0060289|HMDB0060026|HMDB0037264|HMDB0031172|HMDB0004077|HMDB0003320|HMDB0002285|HMDB0000978	2-{[hydroxy(3-hydroxy-4-methoxyphenyl)methylidene]amino}acetic acid|2-{[hydroxy(2-hydroxy-4-methoxyphenyl)methylidene]amino}acetic acid|2-{[hydroxy(3-hydroxy-5-methoxyphenyl)methylidene]amino}acetic acid|Pyridoxaminium(1+)|1-Nitro-5,6-dihydroxy-dihydronaphthalene|Quinoline-4,8-diol|Vanilloylglycine|2-Hydroxy-4,7-dimethoxy-2H-1,4-benzoxazin-3(4H)-one|3-Formyl-6-hydroxyindole|4,6-Dihydroxyquinoline…	44|44|44|13.9|21.6|48|44|3.19|44.7|27.4|30|30|26.9	13	M-H2O-H | M-H2O-H | M-H2O-H | M+FA-H | M-H2O-H | M+FA-H	C10H11NO5 | C10H11NO5 | C10H11NO5 | C9H7NO2 | C10H11NO5 | C9H7NO2	46.2 | 46.2 | 46.2 | 47.3 | 46.2 | 46.6	-0.943315627731083 | -0.943315627731083 | -0.943315627731083 | -1.31830007470939 | -0.943315627731083 | -1.31830007488587	88.3854550512873 | 88.3854550512873 | 88.3854550512873 | 90.0748024089711 | 88.3854550512873 | 90.0748024089711		206.046	1	2.08922	0.258367	20618.7	20695.2	20490.5	20647	21077.4	20162.3	99291.8	88352.3	105055	107370	67007.6	4320.09	4207.89	3457.26	3536.19	2636.44	0	0	6.99863	6.93573	7.12925	21.643	9.10837	0	0	7.72275		-22174.5	2.22e-07	1.03e-06
7.06_525.2325m/z	L3	HMDB0038559 | HMDB0036161 | HMDB0035165 | HMDB0031936 | HMDB0029766 | HMDB0010338	8-Hexanoylneosolaniol | 4-Propanoyl-HT2 toxin | Cinncassiol A 19-glucoside | Blumenol C O-[apiosyl-(1->6)-glucoside] | (3S,7E,9R)-4,7-Megastigmadiene-3,9-diol 9-[apiosyl-(1->6)-glucoside] | 11-Oxo-androsterone glucuronide	6	Endogenous|Food	HMDB0038559|HMDB0036161|HMDB0035165|HMDB0033654|HMDB0031936|HMDB0029766|HMDB0010338	8-Hexanoylneosolaniol|4-Propanoyl-HT2 toxin|Cinncassiol A 19-glucoside|11-Deacetylvaltrate 11-(3-hydroxy-3-methylbutanoate)|Blumenol C O-[apiosyl-(1->6)-glucoside]|(3S,7E,9R)-4,7-Megastigmadiene-3,9-diol 9-[apiosyl-(1->6)-glucoside]|11-Oxo-androsterone glucuronide	66.3|69|71|0|67|70|64.9	7	M+FA-H | M+FA-H | M-H2O-H | M+Na-2H | M+Na-2H | M+FA-H	C25H36O9 | C25H36O9 | C26H40O12 | C24H40O11 | C24H40O11 | C25H36O9	50.7 | 51.2 | 51.4 | 51.4 | 52 | 50.4	-3.44136449520228 | -3.44136449520228 | -3.03657849465963 | 1.49331713611269 | 1.49331713611269 | -3.44136449496555	91.0485046950971 | 91.0485046950971 | 89.3833437065745 | 91.5463389590993 | 91.5463389590993 | 91.0485046950971		525.232	1	7.06393	0.205983	19388.1	21150.8	20707.3	19505.3	19517	15135.7	8884.06	9761.78	9136.16	9918.43	9731.34	23232.5	29419.1	31222.4	23759	29994.7	13640.8	10746.6	11819	14317.8	11661.8	27545.1	23935.5	31399.2	27960.5	26146		1.31106	0.00164194	0.0015885
2.28_205.0137m/z	L3	HMDB0136643 | HMDB0136642 | HMDB0131684 | HMDB0128625 | HMDB0128624 | HMDB0128623	8-hydroxy-2-oxo-2H-chromene-4-carboxylic acid | 7-hydroxy-2-oxo-2H-chromene-4-carboxylic acid | 4-hydroxy-2H,8H-[1,3]dioxolo[4,5-h]chromen-8-one | 5-hydroxy-1-oxo-1H-isochromene-3-carboxylic acid | 6-hydroxy-1-oxo-1H-isochromene-3-carboxylic acid | 7-hydroxy-1-oxo-1H-isochromene-3-carboxylic acid	6	Endogenous	HMDB0136643|HMDB0136642|HMDB0131684|HMDB0128625|HMDB0128624|HMDB0128623|HMDB0036314	8-hydroxy-2-oxo-2H-chromene-4-carboxylic acid|7-hydroxy-2-oxo-2H-chromene-4-carboxylic acid|4-hydroxy-2H,8H-[1,3]dioxolo[4,5-h]chromen-8-one|5-hydroxy-1-oxo-1H-isochromene-3-carboxylic acid|6-hydroxy-1-oxo-1H-isochromene-3-carboxylic acid|7-hydroxy-1-oxo-1H-isochromene-3-carboxylic acid|Dehydrochorismic acid	61.7|61.7|63.7|61.9|61.9|61.9|45.6	7	M-H	C10H6O5	49.5 | 49.5 | 49.9 | 49.5 | 49.5 | 49.5	-2.63251847499544 | -2.63251847499544 | -2.63251847485749 | -2.63251847499544 | -2.63251847499544 | -2.63251847499544	88.8949		205.014	1	2.28188	0.4949	353597	364494	364571	359988	361537	341066	438353	464018	392546	439864	433820	358682	368602	353340	364856	346262	417323	356036	440610	421336	445489	337041	272819	293892	299680	323725		-1.0422	0.401654	0.163633
5.47_206.0490m/z	L3	HMDB0062463 | HMDB0062462 | HMDB0034323 | HMDB0031200 | HMDB0030411 | HMDB0029440	chondroitin sulfate E (GalNAc4,6diS-GlcA), precursor 3 | chondroitin sulfate E (GalNAc4,6diS-GlcA) proteoglycan | S-Allylcysteine | 2-Methyl-2-[(1-oxo-2-propenyl)amino]-1-propanesulfonic acid | (2R,2'S)-Isobuteine | trans-S-(1-Propenyl)-L-cysteine	6	Endogenous|Food	HMDB0062463|HMDB0062462|HMDB0034323|HMDB0031200|HMDB0030411|HMDB0029440	chondroitin sulfate E (GalNAc4,6diS-GlcA), precursor 3|chondroitin sulfate E (GalNAc4,6diS-GlcA) proteoglycan|S-Allylcysteine|2-Methyl-2-[(1-oxo-2-propenyl)amino]-1-propanesulfonic acid|(2R,2'S)-Isobuteine|trans-S-(1-Propenyl)-L-cysteine	23.5|23.5|23.7|24.3|27.2|27.5	6	M-H | M-H | M+FA-H | M-H | M-H | M+FA-H	C10H10ClN3 | C10H10ClN3 | C6H11NO2S | C7H13NO4S | C7H13NO4S | C6H11NO2S	38.9 | 38.9 | 43.1 | 43 | 43.6 | 43.8	-0.103520913225853 | -0.103520913225853 | -1.39892444286908 | -1.08810628212086 | -1.08810628212086 | -1.39892444286908	71.2087884901628 | 71.2087884901628 | 93.3814280495648 | 91.9351889840901 | 91.9351889840901 | 93.3814280495648		206.049	1	5.4673	0.162433	4830.64	5049.14	4992.13	5224.14	5366.15	4372.01	8807.39	10313.6	9413.84	8654.1	10533.1	3598.75	3752.79	3103.24	3691.33	3469.84	5900.03	1459.33	3994.26	4725.43	7339.64	4616.08	1843.87	2361.04	2458.49	5312.24		-2.03778	0.0180451	0.0122702
5.48_243.0623m/z	L3	HMDB0030419 | HMDB0028815 | HMDB0028752 | HMDB0015188 | HMDB0011164 | HMDB0000296	gamma-Glutamylaspartic acid | Glutamylaspartic acid | Aspartyl-Glutamate | Mimosine | L-beta-aspartyl-L-glutamic acid | Uridine	6	Endogenous|Food	HMDB0030419|HMDB0028815|HMDB0028752|HMDB0015188|HMDB0011164|HMDB0000767|HMDB0000296	gamma-Glutamylaspartic acid|Glutamylaspartic acid|Aspartyl-Glutamate|Mimosine|L-beta-aspartyl-L-glutamic acid|Pseudouridine|Uridine	38|42.5|37.8|44.3|37.1|28.8|32.5	7	M-H2O-H | M-H2O-H | M-H2O-H | M+FA-H | M-H2O-H | M-H	C9H14N2O7 | C9H14N2O7 | C9H14N2O7 | C8H10N2O4 | C9H14N2O7 | C9H12N2O6	46.7 | 47.6 | 46.7 | 48.4 | 46.6 | 45.7	0.187825668613758 | 0.187825668613758 | 0.187825668613758 | 0.248517227049511 | 0.187825668613758 | 0.201668225248997	95.8998951724156 | 95.8998951724156 | 95.8998951724156 | 97.7611711490509 | 95.8998951724156 | 96.1521852912523		243.062	1	5.48043	0.193083	5856.27	6603.86	6530.09	6908.17	7151.5	3972.42	4350.38	4554.06	3092.63	4768.96	4604.75	7769.45	8844.87	8535.66	8168.16	9310.42	4815.14	4693.99	4288.39	4845.85	4507.43	6622.7	8027.74	10149.2	9023.62	7940.84		1.08329	0.304054	0.13147
5.03_242.0784m/z	L3	HMDB0060478 | HMDB0029144 | HMDB0028814 | HMDB0028767 | HMDB0028751 | HMDB0028730	gamma-Glutamyl-beta-cyanoalanine | gamma-Glutamylasparagine | Glutamylasparagine | Aspartyl-Gamma-glutamate | Aspartyl-Glutamine | Asparaginyl-Glutamic acid	6	Endogenous	HMDB0060478|HMDB0032055|HMDB0029144|HMDB0028814|HMDB0028793|HMDB0028767|HMDB0028751|HMDB0028730|HMDB0015122|HMDB0000089|HMDB0000089	gamma-Glutamyl-beta-cyanoalanine|N-Acetylhistidine|gamma-Glutamylasparagine|Glutamylasparagine|Glutaminylaspartic acid|Aspartyl-Gamma-glutamate|Aspartyl-Glutamine|Asparaginyl-Glutamic acid|Cytarabine|Cytidine|[IHL:CYTIDINE]	47.7|33|49.4|59.9|40.7|54.8|55.4|51.3|31.9|31.9|13.7	11	M-H | M-H2O-H | M-H2O-H | M-H2O-H | M-H2O-H | M-H2O-H	C9H13N3O5 | C9H15N3O6 | C9H15N3O6 | C9H15N3O6 | C9H15N3O6 | C9H15N3O6	47.1 | 47.4 | 49.5 | 48.5 | 48.6 | 47.8	0.591655609266531 | 0.550859319355174 | 0.550859319355174 | 0.550859319355174 | 0.550859319355174 | 0.550859319355174	88.6454464152834 | 88.4125424270922 | 88.4125424270922 | 88.4125424270922 | 88.4125424270922 | 88.4125424270922		242.078	1	5.03338	0.19705	12013.1	12425.6	12558.3	12962.3	12348.6	10887.5	7782.13	7796.17	7991.97	8575.42	7645.66	15288.5	18082.1	18235	16009.6	18956.6	10073.5	11973.7	8552.39	9537.4	8911.64	14588.3	13870.9	15807.2	14251.9	13550.6		1.23265	0.011407	0.00829078
4.91_243.0624m/z	L3	HMDB0028815 | HMDB0028752 | HMDB0015188 | HMDB0011164 | HMDB0000767 | HMDB0000296	Glutamylaspartic acid | Aspartyl-Glutamate | Mimosine | L-beta-aspartyl-L-glutamic acid | Pseudouridine | Uridine	6	Endogenous|Food	HMDB0030419|HMDB0028815|HMDB0028752|HMDB0015188|HMDB0011164|HMDB0000767|HMDB0000296	gamma-Glutamylaspartic acid|Glutamylaspartic acid|Aspartyl-Glutamate|Mimosine|L-beta-aspartyl-L-glutamic acid|Pseudouridine|Uridine	14.9|32.2|33.8|34.4|31.4|35.1|36.4	7	M-H2O-H | M-H2O-H | M+FA-H | M-H2O-H | M-H | M-H	C9H14N2O7 | C9H14N2O7 | C8H10N2O4 | C9H14N2O7 | C9H12N2O6 | C9H12N2O6	45.4 | 45.8 | 46.2 | 45.3 | 46.1 | 46.3	0.38007231941551 | 0.38007231941551 | 0.502899684942932 | 0.38007231941551 | 0.408101286650712 | 0.40810128688361	95.4516449648023 | 95.4516449648023 | 97.3042210639096 | 95.4516449648023 | 95.7027558425361 | 95.7027558425361		243.062	1	4.91498	0.236617	7607.09	7818.96	7898.24	7763.68	7567.33	7155.33	7724.77	7949.46	7629.43	8107.74	7814.89	7919.96	8463.26	8731.42	8227.59	8502.68	7213.04	7959.13	7541.16	7552.02	6933.57	8096.08	7125.78	7248.98	8037.08	7560.27		-1.0545	0.0687689	0.0382284
7.88_203.0671m/z	L3	HMDB0028840 | HMDB0028819 | HMDB0028746 | HMDB0028683 | HMDB0011667 | HMDB0011162	Glycyl-Glutamate | Glutamylglycine | Aspartyl-Alanine | Alanyl-Aspartic acid | gamma-Glutamylglycine | L-beta-aspartyl-L-alanine	6	Endogenous	HMDB0031670|HMDB0028840|HMDB0028819|HMDB0028746|HMDB0028683|HMDB0014989|HMDB0011667|HMDB0011162	1-(Hydroxymethyl)-5,5-dimethyl-2,4-imidazolidinedione|Glycyl-Glutamate|Glutamylglycine|Aspartyl-Alanine|Alanyl-Aspartic acid|Dacarbazine|gamma-Glutamylglycine|L-beta-aspartyl-L-alanine	31.2|38.9|38.9|43.7|48.5|5.31|43.7|43.7	8	M-H	C7H12N2O5	46.8 | 46.8 | 47.8 | 48.7 | 47.8 | 47.8	-1.00891	96.4117		203.067	1	7.88342	0.17515	7300.86	7456.89	7909.88	8498.77	8882.2	8968.1	3821.52	3457.69	4081.94	3649.25	3576.16	2037.96	2104.42	1837.61	2113.66	2092.47	19227.4	13659.9	13598.4	16898.7	18908.1	17609.8	10847.5	12538.4	11470	15041.8		4.42753	8.37e-08	4.79e-07
7.80_219.0984m/z	L3	HMDB0094702 | HMDB0029127 | HMDB0029071 | HMDB0028854 | HMDB0003357 | HMDB0001104	Gly-Norvaline | Valyl-Glycine | Threoninyl-Threonine | Glycyl-Valine | N-Acetylornithine | N-Acetyl-b-glucosaminylamine	6	Endogenous|Food	HMDB0094702|HMDB0034365|HMDB0029127|HMDB0029071|HMDB0028854|HMDB0003357|HMDB0001104	Gly-Norvaline|L-Theanine|Valyl-Glycine|Threoninyl-Threonine|Glycyl-Valine|N-Acetylornithine|N-Acetyl-b-glucosaminylamine	18.2|3.71|18.2|25.1|18.1|22.4|24.4	7	M+FA-H | M+FA-H | M-H | M+FA-H | M+FA-H | M-H	C7H14N2O3 | C7H14N2O3 | C8H16N2O5 | C7H14N2O3 | C7H14N2O3 | C8H16N2O5	42.8 | 42.8 | 43.9 | 42.7 | 43.6 | 43.8	-1.17293129980699 | -1.17293129980699 | -0.927776575115829 | -1.17293129980699 | -1.17293129980699 | -0.927776575115829	97.0691173518618 | 97.0691173518618 | 95.4951312978353 | 97.0691173518618 | 97.0691173518618 | 95.4951312978353		219.098	1	7.8046	0.188383	4668.01	4812.09	4909.56	4870.87	4972.47	4739.22	2238.37	2281.31	2371.54	2432.77	2076.43	3256.88	3589.74	2937.44	3105.73	3982.97	6806.41	5511.57	6538.18	6100.81	6492.63	10105.3	7148.25	7978.17	7215.86	8817.61		2.75863	1.83e-08	1.8e-07
7.48_201.0878m/z	L3	HMDB0034266 | HMDB0029047 | HMDB0029026 | HMDB0028856 | HMDB0028688 | HMDB0001104	L-Coprine | Serylproline | Prolyl-Serine | Hydroxyprolyl-Alanine | Alanyl-Hydroxyproline | N-Acetyl-b-glucosaminylamine	6	Endogenous|Food	HMDB0001104|HMDB0036458|HMDB0034266|HMDB0029615|HMDB0029387|HMDB0029071|HMDB0029047|HMDB0029026|HMDB0028856|HMDB0028688|HMDB0001104	[IHL:N-ACETYL-B-GLUCOSAMINYLAMINE]|1-Aminocyclopropanecarboxylic acid|L-Coprine|(S)-2-Azetidinecarboxylic acid|L-3-Aminodihydro-2(3H)-furanone|Threoninyl-Threonine|Serylproline|Prolyl-Serine|Hydroxyprolyl-Alanine|Alanyl-Hydroxyproline|N-Acetyl-b-glucosaminylamine	0|0.298|44.9|24.5|34.8|6.8|56.5|49.3|49.3|54.9|42.8	11	M-H | M-H | M-H | M-H | M-H | M-H2O-H	C8H14N2O4 | C8H14N2O4 | C8H14N2O4 | C8H14N2O4 | C8H14N2O4 | C8H16N2O5	47.7 | 50 | 48.6 | 48.6 | 49.7 | 47.3	-1.24618915287237 | -1.24618915273173 | -1.24618915273173 | -1.24618915273173 | -1.24618915273173 | -1.14419793797756	95.214071826601 | 95.214071826601 | 95.214071826601 | 95.214071826601 | 95.214071826601 | 94.8860502570265		201.088	1	7.48485	0.19705	5749.14	5694.96	5654.14	5600.6	5903.67	5226.3	6208.09	6151.81	7008.95	7101.39	7312.94	6690.81	8063.06	6094.78	6785.04	6830.41	5005.36	4478.75	4859.55	5180.6	4671.07	5666.59	4981.7	5358.84	5224.43	6983.75		-1.39627	6.76e-05	0.000103022
5.78_292.1043m/z	L3	HMDB0060493 | HMDB0034085 | HMDB0033699 | HMDB0029354 | HMDB0029353 | HMDB0004824	N-Acetylmuramate | (3R)-3,4-Dihydroxy-3-(hydroxymethyl)butanenitrile 4-glucoside | Linamarin | 4-Hydroxyproline galactoside | Galactosyl 4-hydroxyproline | N2,N2-Dimethylguanosine	6	Endogenous|Food	HMDB0062592|HMDB0060493|HMDB0034085|HMDB0033699|HMDB0029354|HMDB0029353|HMDB0004824|HMDB0002095|HMDB0001961	O-malonyl-L-carnitine|N-Acetylmuramate|(3R)-3,4-Dihydroxy-3-(hydroxymethyl)butanenitrile 4-glucoside|Linamarin|4-Hydroxyproline galactoside|Galactosyl 4-hydroxyproline|N2,N2-Dimethylguanosine|Malonylcarnitine|1,7-Dimethylguanosine	0.108|25.5|28.6|25.5|28.6|28.9|15.3|0.108|12.8	9	M-H | M-H | M+FA-H | M-H | M-H | M-H2O-H	C11H19NO8 | C11H19NO8 | C10H17NO6 | C11H19NO8 | C11H19NO8 | C12H17N5O5	44 | 44.6 | 44.3 | 44.6 | 44.7 | 41.4	1.56896067522529 | 1.56896067541923 | 1.86107081591925 | 1.56896067522529 | 1.56896067522529 | -2.82052028115733	96.4966371698794 | 96.4966371698794 | 98.0290278057093 | 96.4966371698794 | 96.4966371698794 | 94.7851584068711		292.104	1	5.78287	0.210333	18542.8	18019.9	16548.6	15875.2	15166.2	15454	15305.8	16704.3	15975.3	16362.6	22076.7	19884.3	19363	18036.4	22881.3	21326.7	7297.87	4797.89	9349.86	6410.11	6722.94	19396.1	11048.9	11413.4	14053.4	18642.1		-2.49936	7.64e-05	0.000114262
8.26_189.0514m/z	L3	HMDB0062795 | HMDB0041946 | HMDB0028837 | HMDB0028753 | HMDB0015673 | HMDB0011165	N-carbamoylglutamic Acid | N-Nitrosoproline | Glycyl-Aspartate | Aspartyl-Glycine | Carglumic acid | L-beta-aspartyl-L-glycine	6	Endogenous	HMDB0062795|HMDB0041946|HMDB0028837|HMDB0028753|HMDB0015673|HMDB0011165	N-carbamoylglutamic Acid|N-Nitrosoproline|Glycyl-Aspartate|Aspartyl-Glycine|Carglumic acid|L-beta-aspartyl-L-glycine	44.2|35|49.5|47|44.2|47	6	M-H | M+FA-H | M-H | M-H | M-H | M-H	C6H10N2O5 | C5H8N2O3 | C6H10N2O5 | C6H10N2O5 | C6H10N2O5 | C6H10N2O5	46.9 | 45.2 | 47.9 | 47.4 | 46.9 | 47.4	-1.67395594425442 | -2.2085482293313 | -1.67395594425442 | -1.67395594425442 | -1.67395594425442 | -1.67395594425442	92.0491703722904 | 93.4821504001402 | 92.0491703722904 | 92.0491703722904 | 92.0491703722904 | 92.0491703722904		189.051	1	8.25563	0.192683	8435.05	8372.56	8295.35	7948.06	7839.98	7915.58	1137.83	1266.88	1331.87	1218.38	1248.53	1614	1744.64	1826.47	1630.58	1782.06	22283.8	9949.37	12095.7	22195.4	25089.7	13587	11945.5	13606	13557.2	12586.4		14.7681	6.8e-07	2.33e-06
8.32_274.1049m/z	L3	HMDB0029147 | HMDB0029012 | HMDB0028833 | HMDB0028739 | HMDB0011738 | HMDB0005766	N-gamma-Glutamylglutamine | Prolyl-Asparagine | Glutamyl-Gamma-glutamate | Asparaginyl-Proline | N2-gamma-Glutamylglutamine | Norophthalmic acid	6	Endogenous	HMDB0240247|HMDB0029147|HMDB0029012|HMDB0028833|HMDB0028817|HMDB0028796|HMDB0028739|HMDB0011738|HMDB0005766	Pimethixene|N-gamma-Glutamylglutamine|Prolyl-Asparagine|Glutamyl-Gamma-glutamate|Glutamylglutamine|Glutaminylglutamic acid|Asparaginyl-Proline|N2-gamma-Glutamylglutamine|Norophthalmic acid	0|72.6|64.8|74.7|59.6|56.7|63.2|73.2|74.8	9	M-H | M+FA-H | M-H | M+FA-H | M-H | M-H	C10H17N3O6 | C9H15N3O4 | C10H17N3O6 | C9H15N3O4 | C10H17N3O6 | C10H17N3O6	51.6 | 50.3 | 52.1 | 50 | 51.8 | 52.1	1.58509535184396 | 1.90339452292432 | 1.58509535184396 | 1.90339452292432 | 1.58509535184396 | 1.58509535184396	87.5548405006099 | 88.9473243131813 | 87.5548405006099 | 88.9473243131813 | 87.5548405006099 | 87.5548405006099		274.105	1	8.31693	0.1883	31956.4	32765.1	32810.1	35146.7	35935.6	37493.3	13902.9	12899.3	16020.2	16114.3	16972.9	28942.9	31218.2	27198.4	33579	34321.7	47400.7	49708.2	48592.7	46329.6	54717.6	52855.8	41937.7	40683	45136.1	47833.6		3.25056	4e-08	2.97e-07
7.52_218.0901n	L3	HMDB0036301 | HMDB0029040 | HMDB0028872 | HMDB0028686 | HMDB0006248 | HMDB0003764	N-gamma-L-Glutamyl-D-alanine | Serinyl-Hydroxyproline | Hydroxyprolyl-Serine | Alanyl-Glutamic acid | gamma-Glutamylalanine | Glutamylalanine	6	Endogenous|Food	HMDB0036301|HMDB0029040|HMDB0028872|HMDB0028686|HMDB0006248|HMDB0003764	N-gamma-L-Glutamyl-D-alanine|Serinyl-Hydroxyproline|Hydroxyprolyl-Serine|Alanyl-Glutamic acid|gamma-Glutamylalanine|Glutamylalanine	20.3|30.3|15.4|15.7|20.3|20.3	6	M-H2O-H, M-H	C8H14N2O5	42.7 | 44.7 | 41.7 | 41.7 | 42.7 | 42.7	-0.996806	94.2438	218.09	217.083	1	7.52425	0.183917	8106.23	8381	8361.74	8865.59	9140.96	8549.69	292.266	127.768	192.151	278.801	166.599	271.753	323.949	361.808	677.184	719.759	26493.3	19073	19793.3	29112.5	38319.5	14018.5	10500	9268.27	9248.27	15432		125.561	1e-08	1.23e-07
1.43_717.4737m/z	L3	HMDB0115092 | HMDB0114949 | HMDB0114925 | HMDB0114900 | HMDB0010586 | HMDB0007860	PA(20:1(11Z)/14:1(9Z)) | PA(18:2(9Z,12Z)/16:0) | PA(18:1(9Z)/16:1(9Z)) | PA(18:1(11Z)/16:1(9Z)) | PG(16:1(9Z)/16:1(9Z)) | PA(16:0/18:2(9Z,12Z))	6	Endogenous|Food	HMDB0115532|HMDB0115504|HMDB0115092|HMDB0114949|HMDB0114925|HMDB0114900|HMDB0010586|HMDB0007860	PA(20:2(11Z,14Z)/14:0)|PA(14:0/20:2(11Z,14Z))|PA(20:1(11Z)/14:1(9Z))|PA(18:2(9Z,12Z)/16:0)|PA(18:1(9Z)/16:1(9Z))|PA(18:1(11Z)/16:1(9Z))|PG(16:1(9Z)/16:1(9Z))|PA(16:0/18:2(9Z,12Z))	22.7|22.7|34.6|36.5|46.8|46.8|47.8|36.5	8	M+FA-H | M+FA-H | M+FA-H | M+FA-H | M-H | M+FA-H	C37H69O8P | C37H69O8P | C37H69O8P | C37H69O8P | C38H71O10P | C37H69O8P	42.5 | 42.9 | 44.9 | 44.9 | 45.2 | 42.9	3.70153069308947 | 3.70153069292041 | 3.70153069308947 | 3.70153069308947 | 3.46451322184505 | 3.70153069308947	82.2247868029752 | 82.2247868029752 | 82.2247868029752 | 82.2247868029752 | 82.3122678215807 | 82.2247868029752		717.474	1	1.42798	0.2934	99795.8	94538.3	94615.3	96994.6	95610.7	100425	77518.2	77060.9	78863.5	68752.2	65405.4	108326	110976	130353	105996	93676.7	88277	79978.3	85769	87564.7	97430.8	147270	148073	107900	101670	116514		1.19429	0.00665915	0.00523477
1.82_732.5214m/z	L3	HMDB0013410 | HMDB0011436 | HMDB0011403 | HMDB0011204 | HMDB0008919 | HMDB0008918	PC(o-16:1(9Z)/14:1(9Z)) | PE(P-18:1(9Z)/15:0) | PE(P-18:1(11Z)/15:0) | PC(P-16:0/14:1(9Z)) | PE(15:0/P-18:1(9Z)) | PE(15:0/P-18:1(11Z))	6	Endogenous|Food	HMDB0013410|HMDB0011436|HMDB0011403|HMDB0011204|HMDB0008919|HMDB0008918|HMDB0007928	PC(o-16:1(9Z)/14:1(9Z))|PE(P-18:1(9Z)/15:0)|PE(P-18:1(11Z)/15:0)|PC(P-16:0/14:1(9Z))|PE(15:0/P-18:1(9Z))|PE(15:0/P-18:1(11Z))|PC(14:1(9Z)/P-16:0)	19.9|26.1|26.4|19.9|26.2|26.5|5.66	7	M+FA-H	C38H74NO7P	42.3 | 43.6 | 43.6 | 42.3 | 43.6 | 43.6	4.25203399754465 | 4.25203399737929 | 4.25203399737929 | 4.25203399754465 | 4.25203399754465 | 4.25203399754465	96.658		732.521	1	1.8221	0.28025	49652.9	43977.6	43101.8	44928.9	43782.1	55131.3	61661.7	59611.9	87073.1	69941.7	73727.8	67065	64398.1	26159.1	77064.6	78821.4	21301.8	19025.3	15345.6	14101.8	19542.5	23052.6	30023.2	18592.5	19155.7	34265.5		-3.9412	9.76e-07	3.1e-06
1.79_716.5255m/z	L3	HMDB0112954 | HMDB0112953 | HMDB0009055 | HMDB0009022 | HMDB0008927 | HMDB0008926	PE-NMe(15:0/18:1(11Z)) | PE-NMe(15:0/18:1(9Z)) | PE(18:1(9Z)/16:0) | PE(18:1(11Z)/16:0) | PE(16:0/18:1(9Z)) | PE(16:0/18:1(11Z))	6	Endogenous|Food	HMDB0114038|HMDB0114011|HMDB0113986|HMDB0113965|HMDB0113853|HMDB0113852|HMDB0113851|HMDB0113850|HMDB0113139|HMDB0113112|HMDB0112954|HMDB0112953|HMDB0009250|HMDB0009218|HMDB0009055|HMDB0009022|HMDB0008990|HMDB0008958|HMDB0008927|HMDB0008926|HMDB0008866|HMDB0008834|HMDB0008000|HMDB0007936	PE-NMe2(18:1(9Z)/14:0)|PE-NMe2(18:1(11Z)/14:0)|PE-NMe2(18:0/14:1(9Z))|PE-NMe2(16:1(9Z)/16:0)|PE-NMe2(14:1(9Z)/18:0)|PE-NMe2(14:0/18:1(11Z))|PE-NMe2(14:0/18:1(9Z))|PE-NMe2(16:0/16:1(9Z))|PE-NMe(18:1(9Z)/15:0)|PE-NMe(18:1(11Z)/15:0)|PE-NMe(15:0/18:1(11Z))|PE-NMe(15:0/18:1(9Z))|PE(20:1(11Z)/14:0)|PE(20:0/14:1(9Z))|PE(18:1(9Z)/16:0)|PE(18:1(11Z)/16:0)|PE(18:0/16:1(9Z))|PE(16:1(9Z)/18:0)|PE(16:0/18:1(…	58.1|58.1|36.8|27|36.8|58.1|58.1|27|58.1|58.1|78.1|78.1|0.532|0.532|85.6|85.6|46.1|46.1|85.6|85.6|0.532|0.532|8.75|26.9	24	M-H	C39H76NO8P	54.4 | 54.4 | 55.9 | 55.9 | 55.9 | 55.9	2.66489607503323 | 2.66489607503323 | 2.66489607487479 | 2.66489607487479 | 2.66489607503323 | 2.66489607503323	97.1075		716.525	1	1.79145	0.669983	2.87087e+06	2.7408e+06	2.65051e+06	2.61807e+06	2.53376e+06	2.6919e+06	3.92413e+06	4.08452e+06	4.04713e+06	3.953e+06	3.59754e+06	2.91389e+06	2.88136e+06	2.78596e+06	2.84549e+06	2.7968e+06	3.78354e+06	3.41058e+06	3.8985e+06	3.2411e+06	3.64873e+06	2.43564e+06	2.12131e+06	1.52311e+06	1.56393e+06	2.53663e+06		-1.0903	0.0629492	0.0354254
8.13_275.0889m/z	L3	HMDB0039110 | HMDB0031701 | HMDB0029756 | HMDB0028818 | HMDB0028761 | HMDB0011737 | HMDB0002335	(2S,3'S)-alpha-Amino-2-carboxy-5-oxo-1-pyrrolidinebutanoic acid | 1-(gamma-Glutamylamino)cyclopropanecarboxylic acid | (1R,2S,3R)-2-Acetyl-4(5)-(1,2,3,4-tetrahydroxybutyl)imidazole | Glutamylglutamic acid | Aspartyl-Proline | gamma-Glutamylglutamic acid | Aspartyl-L-proline	7	Endogenous|Food	HMDB0042036|HMDB0039110|HMDB0038753|HMDB0038752|HMDB0032796|HMDB0031701|HMDB0029756|HMDB0029013|HMDB0028818|HMDB0028761|HMDB0011737|HMDB0002335	Thymidine glycol|(2S,3'S)-alpha-Amino-2-carboxy-5-oxo-1-pyrrolidinebutanoic acid|Distichonic acid B|Distichonic acid A|Methyl 3-(2,3-dihydroxy-3-methylbutyl)-4-hydroxybenzoate|1-(gamma-Glutamylamino)cyclopropanecarboxylic acid|(1R,2S,3R)-2-Acetyl-4(5)-(1,2,3,4-tetrahydroxybutyl)imidazole|Prolyl-Aspartate|Glutamylglutamic acid|Aspartyl-Proline|gamma-Glutamylglutamic acid|Aspartyl-L-proline	51.7|66.8|42.4|42.4|33.1|66.6|61|47.2|64.7|55.8|64.7|55.8	12	M+FA-H | M+FA-H | M+FA-H | M-H | M+FA-H | M-H | M+FA-H	C9H14N2O5 | C9H14N2O5 | C9H14N2O5 | C10H16N2O7 | C9H14N2O5 | C10H16N2O7 | C9H14N2O5	52.4 | 52.4 | 51.2 | 51.8 | 50.2 | 51.8 | 50.2	1.68277109044656 | 1.68277109044656 | 1.68277109032304 | 1.40236854786697 | 1.68277109044656 | 1.40236854786697 | 1.68277109044656	97.231479144927 | 97.231479144927 | 97.231479144927 | 95.8290883487902 | 97.231479144927 | 95.8290883487902 | 97.231479144927		275.089	1	8.12863	0.3109	29513.7	29573.7	28242	27168.7	27483.5	27424.5	17101.8	16995.3	18357.9	17927.9	17308.5	33182.5	36076.4	37841.7	34690.7	37589.2	23252	22280.6	20527.2	21939.5	20206.4	42322	30886.5	40619.4	36388.9	39883.4		1.23394	0.000116377	0.000166632
8.08_203.0671m/z	L3	HMDB0031670 | HMDB0028840 | HMDB0028819 | HMDB0028746 | HMDB0028683 | HMDB0011667 | HMDB0011162	1-(Hydroxymethyl)-5,5-dimethyl-2,4-imidazolidinedione | Glycyl-Glutamate | Glutamylglycine | Aspartyl-Alanine | Alanyl-Aspartic acid | gamma-Glutamylglycine | L-beta-aspartyl-L-alanine	7	Endogenous|Food	HMDB0031670|HMDB0028840|HMDB0028819|HMDB0028746|HMDB0028683|HMDB0014989|HMDB0011667|HMDB0011162	1-(Hydroxymethyl)-5,5-dimethyl-2,4-imidazolidinedione|Glycyl-Glutamate|Glutamylglycine|Aspartyl-Alanine|Alanyl-Aspartic acid|Dacarbazine|gamma-Glutamylglycine|L-beta-aspartyl-L-alanine	43.1|46.7|49.4|47|46.5|0|49.5|48.4	8	M+FA-H | M-H | M-H | M-H | M-H | M-H | M-H	C6H10N2O3 | C7H12N2O5 | C7H12N2O5 | C7H12N2O5 | C7H12N2O5 | C7H12N2O5 | C7H12N2O5	47.2 | 47.7 | 48.2 | 47.7 | 47.6 | 48.2 | 48	-1.48654793555558 | -1.15143478042039 | -1.15143478042039 | -1.15143478042039 | -1.15143478042039 | -1.15143478042039 | -1.15143478042039	94.5045894071491 | 93.0603766577286 | 93.0603766577286 | 93.0603766577286 | 93.0603766577286 | 93.0603766577286 | 93.0603766577286		203.067	1	8.08047	0.350317	6472.58	6597.36	6753.48	7005.15	6790.9	6857.51	5486.06	4948.7	5827.31	5718.57	4633.77	6187.95	6365.84	6255.24	6273.63	7342.9	11156.2	7117.41	8354.22	8924.65	10698.4	10869.7	7061.18	8635.94	7735.1	9693.08		1.73781	0.000398358	0.000477021
1.52_159.0657m/z	L3	HMDB0061676 | HMDB0059738 | HMDB0059722 | HMDB0029167 | HMDB0002441 | HMDB0000857 | HMDB0000555	2,2-Dimethylglutaric acid | 2-Ethylglutaric acid | Mono-methyl-adipate | 2-Methyladipic acid | 3,3-Dimethylglutaric acid | Pimelic acid | 3-Methyladipic acid	7	Endogenous|Food	HMDB0061676|HMDB0059893|HMDB0059738|HMDB0059722|HMDB0041605|HMDB0033789|HMDB0029573|HMDB0029167|HMDB0002441|HMDB0000857|HMDB0000555	2,2-Dimethylglutaric acid|Ethyl methyl_succinate|2-Ethylglutaric acid|Mono-methyl-adipate|Propyleneglycol diacetate|2-O-Methyl-L-fucose|Diethyl malonate|2-Methyladipic acid|3,3-Dimethylglutaric acid|Pimelic acid|3-Methyladipic acid	51.2|0.384|51.2|37|0.384|32.7|0|51.2|51.2|51.2|51.2	11	M-H	C7H12O4	48.4 | 48.4 | 45.6 | 48.4 | 48.4 | 48.4 | 48.4	-3.58251917888316 | -3.58251917906071 | -3.58251917906071 | -3.58251917906071 | -3.58251917906071 | -3.58251917888316 | -3.58251917906071	95.0613		159.066	1	1.51995	0.2102	3823.8	3816.21	3635.33	3757.94	3723.94	3890.61	5054.13	3828.63	3594.98	3436.84	4045.25	3162.2	2977.87	3501.8	2932.38	2825.65	3935.51	3535.85	3823.17	4032.42	3497.03	2823.41	3474.49	2952.9	3200.72	4059.65		-1.06034	0.506675	0.196833
1.30_243.1603m/z	L3	HMDB0038895 | HMDB0036141 | HMDB0032297 | HMDB0032248 | HMDB0010729 | HMDB0002327 | HMDB0000529	7-Hexyl-2-oxepanone | Menthyl ethylene glycol carbonate | Glyceryl 5-hydroxydecanoate | 11-Dodecenoic acid | trans-Dodec-2-enoic acid | 1,11-Undecanedicarboxylic acid | 5Z-Dodecenoic acid	7	Endogenous|Food	HMDB0041449|HMDB0041264|HMDB0040361|HMDB0040163|HMDB0040158|HMDB0039220|HMDB0038924|HMDB0038895|HMDB0038269|HMDB0038081|HMDB0037813|HMDB0037742|HMDB0037498|HMDB0037329|HMDB0037305|HMDB0037186|HMDB0037184|HMDB0036182|HMDB0036141|HMDB0034844|HMDB0034160|HMDB0033378|HMDB0032297|HMDB0032248|HMDB0032235|HMDB0032214|HMDB0031683|HMDB0029763|HMDB0029585|HMDB0010729|HMDB0002327|HMDB0000529	[(3,7-Dimethyl-6-octenyl)oxy]acetaldehyde|(Â±)-Menthyl acetate|1,1-Dimethoxy-3,7-dimethyl-2,6-octadiene|Hexyl 2-methyl-4-pentenoate|Hexyl 2-methyl-3-pentenoate|Ethyl 4-decenoate|2-Hexenyl hexanoate|7-Hexyl-2-oxepanone|Hexyl 2E-hexenoate|2-Octenyl butyrate|3-Heptyldihydro-5-methyl-2(3H)-furanone|xi-5-Dodecanolide|1-Ethenylhexyl butanoate|Ethyl 2-decenoate|Methyl 9-undecenoate|Rhodinyl acetate|(Â±)…	10.8|10.5|2.21|9.95|9.94|9.81|9.81|11.5|9.94|9.81|10.8|10.9|9.82|10.2|10.2|10.8|0.537|10.5|15.5|10.8|10.8|10.1|15.3|26.3|10.8|10.5|10.9|10.3|10.2|25.6|25.6|25.7	32	M+FA-H | M-H | M-H2O-H | M+FA-H | M+FA-H | M-H | M+FA-H	C12H22O2 | C13H24O4 | C13H26O5 | C12H22O2 | C12H22O2 | C13H24O4 | C12H22O2	41.5 | 42 | 41.9 | 44.5 | 44.3 | 44 | 44.3	0.557213491177241 | 0.452219427535591 | 0.421170191893729 | 0.557213491177241 | 0.557213491177241 | 0.452219427535591 | 0.557213491177241	96.701853575539 | 95.1164967850259 | 94.8668903610074 | 96.701853575539 | 96.701853575539 | 95.1164967850259 | 96.701853575539		243.16	1	1.301	0.183917	5779.41	5753.29	5585.97	6177.58	5976.17	5788.52	5530.9	5021.52	4572.44	4807.79	4926.02	4364.7	3887.68	5357.46	4346.97	3930.87	4530.24	8959.24	4986.65	5345.1	4861.31	3896.05	9085.31	4159.47	4602.67	4473.67		1.15382	0.403146	0.163921
6.66_237.0882m/z	L3	HMDB0029451 | HMDB0028853 | HMDB0001427 | HMDB0001411 | HMDB0001390 | HMDB0001324 | HMDB0001004	gamma-Glutaminyl-4-hydroxybenzene | Glycyltyrosine | 5'-Hydroxycotinine | Cotinine N-oxide | Hydroxycotinine | N'-Hydroxymethylnorcotinine | Oxoamide	7	Endogenous|Food	HMDB0094653|HMDB0040988|HMDB0029451|HMDB0029105|HMDB0028853|HMDB0015084|HMDB0011648|HMDB0001427|HMDB0001411|HMDB0001390|HMDB0001324|HMDB0001004	Pyrimidine, 2,4- bis[(trimethylsilyl)oxy]-|Falimint|gamma-Glutaminyl-4-hydroxybenzene|Tyrosyl-Glycine|Glycyltyrosine|Felbamate|1-(beta-D-Ribofuranosyl)-1,4-dihydronicotinamide|5'-Hydroxycotinine|Cotinine N-oxide|Hydroxycotinine|N'-Hydroxymethylnorcotinine|Oxoamide	0|14.3|24.1|14.5|31.1|3.08|13.1|23|24.9|23|20.7|22.1	12	M-H | M-H | M+FA-H | M+FA-H | M+FA-H | M+FA-H | M+FA-H	C11H14N2O4 | C11H14N2O4 | C10H12N2O2 | C10H12N2O2 | C10H12N2O2 | C10H12N2O2 | C10H12N2O2	44 | 45.4 | 44.1 | 44.5 | 44.1 | 43.6 | 43.9	0.382194946638267 | 0.382194946757638 | 0.473737103589225 | 0.473737103589225 | 0.473737103589225 | 0.473737103589225 | 0.473737103737185	96.4023774463516 | 96.4023774463516 | 97.9969704014049 | 97.9969704014049 | 97.9969704014049 | 97.9969704014049 | 97.9969704014049		237.088	1	6.6602	0.311333	7965.52	8370.24	8175.87	8369.18	8424.21	7676.35	1308.75	1391.52	1506.55	1422.05	1185.9	2775.61	3376.64	3606.88	2596.12	3648.95	11841.2	14146.5	10904.8	12308.1	11369.2	16504.7	16738.3	19580.2	17313.9	15873.6		8.888	3.77e-10	1.12e-08
4.22_160.0610m/z	L3	HMDB0094716 | HMDB0062557 | HMDB0034208 | HMDB0030091 | HMDB0029423 | HMDB0002030 | HMDB0001514	hydroxybutyrylglycine | N-Acetylthreonine | Pterolactam | beta-D-Glucosamine | Acetylhomoserine | Fructosamine | Glucosamine	7	Endogenous|Food	HMDB0094716|HMDB0062660|HMDB0062557|HMDB0061715|HMDB0034208|HMDB0033747|HMDB0030409|HMDB0030091|HMDB0029423|HMDB0012880|HMDB0003411|HMDB0002030|HMDB0001514|HMDB0000510|HMDB0000162	hydroxybutyrylglycine|N-methyl-L-glutamic Acid|N-Acetylthreonine|Glutamate, gamma-methyl ester|Pterolactam|(Â±)-2,2'-Iminobispropanoic acid|4-Amino-2-methylenebutanoic acid|beta-D-Glucosamine|Acetylhomoserine|Acetamidopropanal|D-Proline|Fructosamine|Glucosamine|Aminoadipic acid|L-Proline	34.8|5.36|27.7|10.5|20.6|5.37|10.3|34.3|32|17.5|12.8|34.5|34.3|13.7|12.8	15	M-H | M-H | M+FA-H | M-H2O-H | M-H | M-H2O-H | M-H2O-H	C6H11NO4 | C6H11NO4 | C5H9NO2 | C6H13NO5 | C6H11NO4 | C6H13NO5 | C6H13NO5	45.5 | 44.1 | 42.7 | 45.5 | 45 | 45.5 | 45.5	-3.19614021422345 | -3.19614021404699 | -4.47403391268824 | -2.87467052588255 | -3.19614021422345 | -2.87467052588255 | -2.87467052588255	96.6634668369547 | 96.6634668369547 | 98.1728518014882 | 96.4219420250509 | 96.6634668369547 | 96.4219420250509 | 96.4219420250509		160.061	1	4.22312	0.26275	5587.23	6190.22	5867.95	5226.07	5125.94	4114.55	8430.39	10272.8	8207.74	8038.88	9735.52	5358.9	5800.68	5809.43	5341.46	4594.13	3943.82	2485.48	4064.78	4830.67	4085.6	4504.53	3357.05	3424.02	3730.83	4294.48		-2.30214	0.000114375	0.000164235
7.62_253.0807m/z	L3	HMDB0029393 | HMDB0029123 | HMDB0029062 | HMDB0028873 | HMDB0028766 | HMDB0012161 | HMDB0001199	L-N-(3-Carboxypropyl)glutamine | Valyl-Aspartate | Threoninyl-Hydroxyproline | Hydroxyprolyl-Threonine | Aspartyl-Valine | 4-(Glutamylamino) butanoate | N2-Succinyl-L-ornithine	7	Endogenous|Food	HMDB0029393|HMDB0029123|HMDB0029062|HMDB0028873|HMDB0028766|HMDB0012161|HMDB0001199	L-N-(3-Carboxypropyl)glutamine|Valyl-Aspartate|Threoninyl-Hydroxyproline|Hydroxyprolyl-Threonine|Aspartyl-Valine|4-(Glutamylamino) butanoate|N2-Succinyl-L-ornithine	37.6|41.4|40.6|37.7|45.7|37.6|38.6	7	M+Na-2H	C9H16N2O5	45.7 | 46.5 | 46.3 | 45.7 | 47.3 | 45.7 | 45.9	0.346233	91.3811		253.081	1	7.61622	0.297867	7694.38	6825.38	7115.77	6675.48	6728.45	8411.86	2589.23	2812.66	2908.71	2444.97	2348.5	2364.74	2011.57	2426.8	2803.64	2415.61	15633.5	12523.5	19417.7	13436.3	16741.4	6792.71	5250.39	4535.42	5139.06	9113.41		5.93344	3.89e-08	2.91e-07
4.29_190.0718m/z	L3	HMDB0061156 | HMDB0059595 | HMDB0031346 | HMDB0029426 | HMDB0029425 | HMDB0003681 | HMDB0001263	N-(2-Carboxymethyl)-morpholine | (S)-2-amino-6-oxohexanoate | Calystegine C1 | L-trans-5-Hydroxy-2-piperidinecarboxylic acid | L-cis-4-(Hydroxymethyl)-2-pyrrolidinecarboxylic acid | 4-Acetamidobutanoic acid | Allysine	7	Endogenous|Food	HMDB0094698|HMDB0062696|HMDB0061156|HMDB0059595|HMDB0031346|HMDB0029426|HMDB0029425|HMDB0015127|HMDB0012151|HMDB0012131|HMDB0003681|HMDB0001263|HMDB0000808|HMDB0000730	N-Propionylalanine|Pyridoxaminium(1+)|N-(2-Carboxymethyl)-morpholine|(S)-2-amino-6-oxohexanoate|Calystegine C1|L-trans-5-Hydroxy-2-piperidinecarboxylic acid|L-cis-4-(Hydroxymethyl)-2-pyrrolidinecarboxylic acid|Methyl aminolevulinate|2-Keto-6-aminocaproate|(S)-5-Amino-3-oxohexanoate|4-Acetamidobutanoic acid|Allysine|N-Butyrylglycine|Isobutyrylglycine	3.25|0|53.2|55|53|54.2|53.2|5.88|13.4|12.1|54.4|55|1.45|1.45	14	M+FA-H | M+FA-H | M-H | M+FA-H | M+FA-H | M+FA-H | M+FA-H	C6H11NO3 | C6H11NO3 | C7H13NO5 | C6H11NO3 | C6H11NO3 | C6H11NO3 | C6H11NO3	49.3 | 49.7 | 49.1 | 49.6 | 49.3 | 49.6 | 49.7	-2.15553961210293 | -2.15553961210293 | -1.63656484426299 | -2.15553961210293 | -2.15553961190702 | -2.15553961210293 | -2.15553961210293	96.1298895991911 | 96.1298895991911 | 94.6593689852367 | 96.1298895991911 | 96.1298895991911 | 96.1298895991911 | 96.1298895991911		190.072	1	4.2888	0.21895	3723.43	4127.71	3969.58	3783.16	3967.91	3409.16	2849.95	2794.55	2796.84	2943.76	3086.1	4210.28	4999.67	4891.98	4753.12	4644.06	3633.94	3150.64	3468.15	3951.49	3437.61	4627.52	3971.65	3999.99	4225.69	4754.2		1.2191	0.00150041	0.00147002
4.80_261.1247m/z	L3	HMDB0139612 | HMDB0139611 | HMDB0139610 | HMDB0033465 | HMDB0029118 | HMDB0011179 | HMDB0011177	N-(4-aminobutyl)-3-(4-hydroxy-3-methoxyphenyl)oxirane-2-carboximidic acid | N-(4-amino-2-hydroxybutyl)-3-(4-hydroxy-3-methoxyphenyl)prop-2-enimidic acid | N-(4-amino-3-hydroxybutyl)-3-(4-hydroxy-3-methoxyphenyl)prop-2-enimidic acid | Feruloyl-2-hydroxyputrescine | Tyrosyl-Valine | Prolylphenylalanine | Phenylalanylproline	7	Endogenous|Food	HMDB0139616|HMDB0139615|HMDB0139614|HMDB0139612|HMDB0139611|HMDB0139610|HMDB0034292|HMDB0033465|HMDB0029837|HMDB0029139|HMDB0029118|HMDB0014617|HMDB0011179|HMDB0011177	N-(4-aminobutyl)-3-(3,4-dihydroxy-5-methoxyphenyl)prop-2-enimidic acid|N-(4-aminobutyl)-3-(2,4-dihydroxy-5-methoxyphenyl)prop-2-enimidic acid|N-(4-aminobutyl)-3-(2,4-dihydroxy-3-methoxyphenyl)prop-2-enimidic acid|N-(4-aminobutyl)-3-(4-hydroxy-3-methoxyphenyl)oxirane-2-carboximidic acid|N-(4-amino-2-hydroxybutyl)-3-(4-hydroxy-3-methoxyphenyl)prop-2-enimidic acid|N-(4-amino-3-hydroxybutyl)-3-(4-hyd…	7.01|7.01|7.01|14.9|16.5|16.5|8.43|15.9|2.56|7.4|11.9|0|16.1|25.5	14	M-H2O-H | M-H2O-H | M-H2O-H | M-H2O-H | M-H2O-H | M-H | M-H	C14H20N2O4 | C14H20N2O4 | C14H20N2O4 | C14H20N2O4 | C14H20N2O4 | C14H18N2O3 | C14H18N2O3	39.6 | 40 | 40 | 39.8 | 39.1 | 39.9 | 41.8	0.905043157490643 | 0.905043157490643 | 0.905043157490643 | 0.905043157693552 | 0.905043157693552 | 0.967210517525231 | 0.967210517525231	84.4266600808349 | 84.4266600808349 | 84.4266600808349 | 84.4266600808349 | 84.4266600808349 | 84.6487717635263 | 84.6487717635263		261.125	1	4.80113	0.394267	43506.5	46384.1	46655.6	45658.6	45974.2	38456.2	27721.5	27247.2	26084.6	29803	24286.7	63273.4	70019.8	72150	66949.5	68243.3	32467.6	36098.7	33432.8	37009.3	32573.1	47533.8	48170.9	54440.8	53298.3	47268.9		1.26963	0.000560332	0.000634587
6.67_256.0942m/z	L3	HMDB0029147 | HMDB0028833 | HMDB0028817 | HMDB0028796 | HMDB0015078 | HMDB0011738 | HMDB0005766	N-gamma-Glutamylglutamine | Glutamyl-Gamma-glutamate | Glutamylglutamine | Glutaminylglutamic acid | Zalcitabine | N2-gamma-Glutamylglutamine | Norophthalmic acid	7	Endogenous	HMDB0039229|HMDB0029147|HMDB0028833|HMDB0028817|HMDB0028796|HMDB0015078|HMDB0011738|HMDB0005766|HMDB0000982	Pyro-L-glutaminyl-L-glutamine|N-gamma-Glutamylglutamine|Glutamyl-Gamma-glutamate|Glutamylglutamine|Glutaminylglutamic acid|Zalcitabine|N2-gamma-Glutamylglutamine|Norophthalmic acid|5-Methylcytidine	62.2|71.5|71.6|77.4|75.7|71.5|76.9|72|55.8	9	M-H2O-H | M-H2O-H | M-H2O-H | M-H2O-H | M+FA-H | M-H2O-H | M-H2O-H	C10H17N3O6 | C10H17N3O6 | C10H17N3O6 | C10H17N3O6 | C9H13N3O3 | C10H17N3O6 | C10H17N3O6	51.5 | 51.5 | 52.7 | 52.4 | 51.8 | 52.6 | 51.6	1.06264348748218 | 1.06264348748218 | 1.06264348748218 | 1.06264348748218 | 1.38488214525377 | 1.06264348748218 | 1.06264348748218	87.4393513808978 | 87.4393513808978 | 87.4393513808978 | 87.4393513808978 | 89.1323850752682 | 87.4393513808978 | 87.4393513808978		256.094	1	6.66895	0.3335	14343.7	14272.2	14008.6	13605.3	13396.1	14158.5	7020.54	7292.62	11655.3	7977.25	7990.08	17697.7	21503.6	23154.5	19995.8	22821.3	8942.91	6667.07	9044.78	10433	8828.71	18117.1	15150.7	18779.5	17542.9	16912.3		1.04723	0.657581	0.23984
1.86_275.1044m/z	L3	HMDB0062178 | HMDB0060811 | HMDB0032349 | HMDB0032058 | HMDB0029106 | HMDB0028875 | HMDB0001894	N-lactoyl-Tryptophan | cyclic Melatonin | Isoeugenyl benzyl ether | Isoeugenol benzyl ether | Tyrosyl-Hydroxyproline | Hydroxyprolyl-Tyrosine | Aspartame	7	Endogenous|Food	HMDB0112083|HMDB0062178|HMDB0060811|HMDB0038514|HMDB0038256|HMDB0037942|HMDB0032349|HMDB0032058|HMDB0031865|HMDB0029156|HMDB0029106|HMDB0028994|HMDB0028875|HMDB0001894|HMDB0000594	3,4-Dimethyl-5-pentyl-2-furanpropanoic acid|N-lactoyl-Tryptophan|cyclic Melatonin|L-gamma-Glutamyl-beta-phenyl-beta-L-alanine|Geranyl acetoacetate|(1xi,3xi)-1,2,3,4-Tetrahydro-1-methyl-beta-carboline-3-carboxylic acid|Isoeugenyl benzyl ether|Isoeugenol benzyl ether|4'-tert-Butyl-2',6'-dimethyl-3',5'-dinitroacetophenone|Glutamylphenylalanine|Tyrosyl-Hydroxyproline|Phenylalanyl-Glutamate|Hydroxypro…	2.59|37.1|36.7|6.82|0|6.84|37.3|37.3|0|0|39|0|39|38.6|6.82	15	M-H | M+FA-H | M+Na-2H | M+Na-2H | M-H2O-H | M-H2O-H | M-H2O-H	C14H16N2O4 | C13H14N2O2 | C17H18O2 | C17H18O2 | C14H18N2O5 | C14H18N2O5 | C14H18N2O5	45.1 | 45.2 | 44.6 | 44.6 | 45.5 | 45.5 | 45.4	2.58991963831446 | 3.10773316271148 | -3.54920587046698 | -3.54920587046698 | 2.43134026250099 | 2.43134026250099 | 2.43134026250099	91.4798964703396 | 92.9346648466742 | 89.6342570637279 | 89.6342570637279 | 91.2402504444256 | 91.2402504444256 | 91.2402504444256		275.104	1	1.8615	0.17515	3951.5	4204.11	4248.01	4318.76	4058.69	4172.39	903.976	824.651	476.789	802.48	392.507	816.324	1095.66	11250.1	541.408	498.677	6068.4	7098.85	12914.7	15298.4	5977.05	4301.72	10245	3501.35	4316.09	2321.45		13.927	8.24e-06	1.75e-05
1.45_747.5205m/z	L3	HMDB0115094 | HMDB0114926 | HMDB0114901 | HMDB0010630 | HMDB0010615 | HMDB0010574 | HMDB0010573	PA(20:1(11Z)/16:0) | PA(18:1(9Z)/18:0) | PA(18:1(11Z)/18:0) | PG(18:1(9Z)/16:0) | PG(18:1(11Z)/16:0) | PG(16:0/18:1(9Z)) | PG(16:0/18:1(11Z))	7	Endogenous|Food	HMDB0115270|HMDB0115241|HMDB0115094|HMDB0115065|HMDB0114926|HMDB0114901|HMDB0114789|HMDB0010630|HMDB0010615|HMDB0010601|HMDB0010587|HMDB0010574|HMDB0010573	PA(22:1(13Z)/14:0)|PA(22:0/14:1(9Z))|PA(20:1(11Z)/16:0)|PA(20:0/16:1(9Z))|PA(18:1(9Z)/18:0)|PA(18:1(11Z)/18:0)|PA(14:0/22:1(13Z))|PG(18:1(9Z)/16:0)|PG(18:1(11Z)/16:0)|PG(18:0/16:1(9Z))|PG(16:1(9Z)/18:0)|PG(16:0/18:1(9Z))|PG(16:0/18:1(11Z))	50.6|23.8|63.1|37.9|71.4|71.4|50.6|78.1|78.1|55.2|55.2|78.1|78.1	13	M+FA-H | M+FA-H | M+FA-H | M-H | M-H | M-H | M-H	C39H75O8P | C39H75O8P | C39H75O8P | C40H77O10P | C40H77O10P | C40H77O10P | C40H77O10P	51.3 | 52.9 | 52.9 | 54.5 | 54.5 | 54.5 | 54.5	3.30770421216162 | 3.30770421216162 | 3.30770421216162 | 3.10440614039314 | 3.10440614039314 | 3.10440614054502 | 3.10440614054502	97.2370953985414 | 97.2370953985414 | 97.2370953985414 | 97.9446273352383 | 97.9446273352383 | 97.9446273352383 | 97.9446273352383		747.52	1	1.44988	0.486067	7.28312e+06	6.98012e+06	6.85884e+06	6.97883e+06	6.94331e+06	7.06211e+06	7.60272e+06	7.98028e+06	7.82502e+06	7.73491e+06	7.91655e+06	7.05984e+06	6.7767e+06	7.13618e+06	6.78543e+06	6.29074e+06	9.14044e+06	9.08078e+06	9.23355e+06	8.3912e+06	9.33868e+06	8.75303e+06	6.94284e+06	7.20379e+06	7.49664e+06	8.18365e+06		1.15682	0.000115566	0.000165707
1.79_702.5104m/z	L3	HMDB0113964 | HMDB0113064 | HMDB0112949 | HMDB0008894 | HMDB0008893 | HMDB0007998 | HMDB0007966	PE-NMe2(16:1(9Z)/15:0) | PE-NMe(16:1(9Z)/16:0) | PE-NMe(16:0/16:1(9Z)) | PE(15:0/18:1(9Z)) | PE(15:0/18:1(11Z)) | PC(16:1(9Z)/14:0) | PC(16:0/14:1(9Z))	7	Endogenous|Food	HMDB0113964|HMDB0113846|HMDB0113137|HMDB0113110|HMDB0113085|HMDB0113064|HMDB0112952|HMDB0112951|HMDB0112950|HMDB0112949|HMDB0009054|HMDB0009021|HMDB0008894|HMDB0008893|HMDB0007998|HMDB0007966|HMDB0007902|HMDB0007870	PE-NMe2(16:1(9Z)/15:0)|PE-NMe2(15:0/16:1(9Z))|PE-NMe(18:1(9Z)/14:0)|PE-NMe(18:1(11Z)/14:0)|PE-NMe(18:0/14:1(9Z))|PE-NMe(16:1(9Z)/16:0)|PE-NMe(14:1(9Z)/18:0)|PE-NMe(14:0/18:1(11Z))|PE-NMe(14:0/18:1(9Z))|PE-NMe(16:0/16:1(9Z))|PE(18:1(9Z)/15:0)|PE(18:1(11Z)/15:0)|PE(15:0/18:1(9Z))|PE(15:0/18:1(11Z))|PC(16:1(9Z)/14:0)|PC(16:0/14:1(9Z))|PC(14:1(9Z)/16:0)|PC(14:0/16:1(9Z))	29.4|19.7|11.3|11.3|11.1|34.6|11.1|15|15|39.7|15.5|15.5|31.4|31.4|25.7|39.5|15.9|10.9	18	M-H	C38H74NO8P	43.9 | 45 | 46 | 44.3 | 44.3 | 43.2 | 45.9	3.58036026592335 | 3.58036026592335 | 3.58036026608495 | 3.58036026608495 | 3.58036026608495 | 3.58036026592335 | 3.58036026608495	94.4108		702.51	1	1.78707	0.472933	66155	63483.9	63317	63354.1	62805.2	64377.6	145002	153717	154451	139280	142468	67741.1	63328	56973.5	61832.9	56066.1	53275.3	40911	57914.6	39825	43882	39015.6	23060.2	17689.7	18716.9	36555.8		-3.1166	4.11e-07	1.55e-06
5.46_187.1084m/z	L3	HMDB0029120 | HMDB0028929 | HMDB0028844 | HMDB0028700 | HMDB0000759 | HMDB0000446 | HMDB0000206	Valyl-Alanine | Leucyl-Glycine | Glycyl-Isoleucine | Alanyl-Valine | Glycylleucine | N-Alpha-acetyllysine | N6-Acetyl-L-lysine	7	Endogenous|Food	HMDB0029120|HMDB0028929|HMDB0028907|HMDB0028844|HMDB0028700|HMDB0000759|HMDB0000446|HMDB0000206	Valyl-Alanine|Leucyl-Glycine|Isoleucyl-Glycine|Glycyl-Isoleucine|Alanyl-Valine|Glycylleucine|N-Alpha-acetyllysine|N6-Acetyl-L-lysine	30.8|30.6|17.7|32.7|30.8|44.6|37.4|37.8	8	M-H	C8H16N2O3	45.2 | 45.1 | 45.5 | 45.1 | 47.9 | 46.5 | 46.5	-1.95107664101148 | -1.95107664101148 | -1.95107664101148 | -1.95107664101148 | -1.95107664116257 | -1.95107664101148 | -1.95107664101148	97.2585		187.108	1	5.46293	0.193083	7448.74	8188.29	8196.81	8362.96	8671.52	6342.73	2938.71	3019.6	1959.65	2856.57	2679.63	4753.93	5602.34	5740.21	4756.05	5409.67	10324.9	10565.9	8822.79	10533.8	9511.09	11800.9	13166.2	15774.1	13681.7	11843.4		3.69837	3.39e-07	1.35e-06
2.09_226.1197m/z	L3	HMDB0029141 | HMDB0029125 | HMDB0028924 | HMDB0028902 | HMDB0028810 | HMDB0028735 | HMDB0028734	Valyl-Gamma-glutamate | Valyl-Glutamine | Leucyl-Asparagine | Isoleucyl-Asparagine | Glutaminylvaline | Asparaginyl-Leucine | Asparaginyl-Isoleucine	7	Endogenous	HMDB0029141|HMDB0029125|HMDB0028924|HMDB0028902|HMDB0028810|HMDB0028735|HMDB0028734	Valyl-Gamma-glutamate|Valyl-Glutamine|Leucyl-Asparagine|Isoleucyl-Asparagine|Glutaminylvaline|Asparaginyl-Leucine|Asparaginyl-Isoleucine	30.5|42.3|42.3|42.3|42.3|42.3|42.3	7	M-H2O-H	C10H19N3O4	44.5 | 46.9 | 46.9 | 46.9 | 46.9 | 46.9 | 46.9	-0.145602170352748 | -0.145602170352748 | -0.145602170352748 | -0.145602170352748 | -0.14560217046869 | -0.145602170352748 | -0.145602170352748	92.3396		226.12	1	2.08922	0.245217	3779.68	3888.66	3687.28	3717.72	3698.21	3584.57	2497.74	2562.53	2999.04	2969.47	2934.21	4355.69	4819.45	4597.46	4496.39	5023.74	3197.24	2670.87	2777.17	3072.67	3000.34	4759.25	4111.04	4744.84	4652.29	4739.07		1.05409	0.328194	0.139382
7.25_244.1304m/z	L3	HMDB0029141 | HMDB0029125 | HMDB0028924 | HMDB0028902 | HMDB0028810 | HMDB0028735 | HMDB0028734	Valyl-Gamma-glutamate | Valyl-Glutamine | Leucyl-Asparagine | Isoleucyl-Asparagine | Glutaminylvaline | Asparaginyl-Leucine | Asparaginyl-Isoleucine	7	Endogenous	HMDB0029141|HMDB0029125|HMDB0028924|HMDB0028902|HMDB0028810|HMDB0028735|HMDB0028734	Valyl-Gamma-glutamate|Valyl-Glutamine|Leucyl-Asparagine|Isoleucyl-Asparagine|Glutaminylvaline|Asparaginyl-Leucine|Asparaginyl-Isoleucine	32.8|32.8|28.7|28.7|30.9|28.7|29.4	7	M-H	C10H19N3O4	45.4 | 45.4 | 44.6 | 44.6 | 45.1 | 44.6 | 44.7	0.525619663316124 | 0.525619663316124 | 0.525619663316124 | 0.525619663316124 | 0.525619663200182 | 0.525619663316124 | 0.525619663316124	94.9785		244.13	1	7.25223	0.197583	2839.76	3026.44	3096.95	3031.58	3155.93	2588.64	368.234	463.002	518.183	508.159	363.859	660.878	944.977	1145.96	722.758	1339.7	3773.13	3157.95	3076.58	3809.69	3273.25	6398.79	5868.47	8129.49	6878.02	6239.33		7.69348	1.35e-08	1.46e-07
6.96_244.1304m/z	L3	HMDB0029141 | HMDB0029125 | HMDB0028924 | HMDB0028902 | HMDB0028810 | HMDB0028735 | HMDB0028734	Valyl-Gamma-glutamate | Valyl-Glutamine | Leucyl-Asparagine | Isoleucyl-Asparagine | Glutaminylvaline | Asparaginyl-Leucine | Asparaginyl-Isoleucine	7	Endogenous	HMDB0029141|HMDB0029125|HMDB0028924|HMDB0028902|HMDB0028810|HMDB0028735|HMDB0028734	Valyl-Gamma-glutamate|Valyl-Glutamine|Leucyl-Asparagine|Isoleucyl-Asparagine|Glutaminylvaline|Asparaginyl-Leucine|Asparaginyl-Isoleucine	49.9|55.4|62.9|60.5|52.5|56.6|51.3	7	M-H	C10H19N3O4	48.9 | 50 | 51.5 | 51 | 49.4 | 50.3 | 49.2	0.560283875275532 | 0.560283875275532 | 0.560283875275532 | 0.560283875275532 | 0.560283875159591 | 0.560283875275532 | 0.560283875275532	95.373		244.13	1	6.95867	0.289583	7085.82	7824.44	7793.11	7607.3	7704.83	6381.32	1276.76	1450.73	1532.08	1462.14	1278.78	2300.73	2964.89	3366.49	2458.77	3608.25	9304.53	8433.74	8106.74	9669.91	8302.64	16301.3	15307.6	20669.7	18673.5	16721		6.25921	3.8e-10	1.12e-08
6.54_259.1302m/z	L3	HMDB0029135 | HMDB0028928 | HMDB0028906 | HMDB0028823 | HMDB0028822 | HMDB0011171 | HMDB0011170	Valyl-Proline | Leucyl-Glutamate | Isoleucyl-Glutamate | Glutamylleucine | Glutamylisoleucine | gamma-Glutamylleucine | gamma-Glutamylisoleucine	7	Endogenous|Food	HMDB0029135|HMDB0029030|HMDB0028928|HMDB0028906|HMDB0028823|HMDB0028822|HMDB0011171|HMDB0011170|HMDB0003581	Valyl-Proline|Prolyl-Valine|Leucyl-Glutamate|Isoleucyl-Glutamate|Glutamylleucine|Glutamylisoleucine|gamma-Glutamylleucine|gamma-Glutamylisoleucine|Dethiobiotin	45|38.7|49.5|49.5|55.9|55.9|55.9|56|36.5	9	M+FA-H | M-H | M-H | M-H | M-H | M-H | M-H	C10H18N2O3 | C11H20N2O5 | C11H20N2O5 | C11H20N2O5 | C11H20N2O5 | C11H20N2O5 | C11H20N2O5	46.4 | 47.1 | 47.1 | 48.4 | 48.4 | 48.4 | 48.4	1.09116968187396 | 0.898190592449096 | 0.898190592449096 | 0.898190592449096 | 0.898190592449096 | 0.898190592449096 | 0.898190592449096	88.4461522486002 | 86.9885622110116 | 86.9885622110116 | 86.9885622110116 | 86.9885622110116 | 86.9885622110116 | 86.9885622110116		259.13	1	6.53718	0.487	38153.7	39696.6	39747.1	40445.2	39924.8	36149.6	44590.7	44608	48810.9	48096.7	70144.6	45886.6	48904.4	44561.7	48650.3	46480.5	29466.5	23962.5	28639	27566.3	28173.2	35101.6	32982.2	37584	35848.8	34174.5		-1.85948	0.000165568	0.000225469
7.39_229.0830m/z	L3	HMDB0039110 | HMDB0031701 | HMDB0029159 | HMDB0029060 | HMDB0029013 | HMDB0028829 | HMDB0028761 | HMDB0002335	(2S,3'S)-alpha-Amino-2-carboxy-5-oxo-1-pyrrolidinebutanoic acid | 1-(gamma-Glutamylamino)cyclopropanecarboxylic acid | gamma-Glutamylthreonine | Threoninyl-Glutamate | Prolyl-Aspartate | Glutamylthreonine | Aspartyl-Proline | Aspartyl-L-proline	8	Endogenous|Food	HMDB0040331|HMDB0039110|HMDB0032345|HMDB0031701|HMDB0031328|HMDB0029756|HMDB0029159|HMDB0029060|HMDB0029013|HMDB0028829|HMDB0028761|HMDB0002335	xi-2,5-Dihydro-2,4-dimethylthiazole|(2S,3'S)-alpha-Amino-2-carboxy-5-oxo-1-pyrrolidinebutanoic acid|Isobutyl isothiocyanate|1-(gamma-Glutamylamino)cyclopropanecarboxylic acid|1-Isothiocyanatobutane|(1R,2S,3R)-2-Acetyl-4(5)-(1,2,3,4-tetrahydroxybutyl)imidazole|gamma-Glutamylthreonine|Threoninyl-Glutamate|Prolyl-Aspartate|Glutamylthreonine|Aspartyl-Proline|Aspartyl-L-proline	0|43|0|39.1|0|13.1|38.4|36.7|46.8|37.3|43.5|43.5	12	M-H | M-H | M-H2O-H | M-H2O-H | M-H | M-H2O-H | M-H | M-H	C9H14N2O5 | C9H14N2O5 | C9H16N2O6 | C9H16N2O6 | C9H14N2O5 | C9H16N2O6 | C9H14N2O5 | C9H14N2O5	46.4 | 45.6 | 45.4 | 45.1 | 47.1 | 45.2 | 46.5 | 46.5	-0.0616022900796362 | -0.0616022900796362 | -0.0571130184886674 | -0.0571130184886674 | -0.0616022900796362 | -0.0571130184886674 | -0.0616022900796362 | -0.0616022900796362	88.9778319515033 | 88.9778319515033 | 88.7439912290897 | 88.7439912290897 | 88.9778319515033 | 88.7439912290897 | 88.9778319515033 | 88.9778319515033		229.083	1	7.39288	0.232217	12591.2	14034.4	13504.6	12685.9	12696.6	9457.45	2958.92	3090.23	2702.91	3158.16	3328.91	3046.29	3416.07	3152.43	3475.79	3184.78	36323.9	23729.4	22236.4	38678.3	36547.7	21066.1	12076.6	15172.8	15057.9	18121.3		10.3363	7.04e-08	4.22e-07
2.30_225.0880m/z	L3	HMDB0041109 | HMDB0029157 | HMDB0029016 | HMDB0028864 | HMDB0028827 | HMDB0006875 | HMDB0001301 | HMDB0000245	(S)-3-Ethylidenehexahydropyrrolo[1,2-a]pyrazine-1,4-dione | gamma-Glutamylproline | Prolyl-Glutamate | Hydroxyprolyl-Hydroxyproline | Glutamylproline | 1-Pyrroline-2-carboxylic acid | 1-Pyrroline-5-carboxylic acid | Porphobilinogen	8	Endogenous|Food	HMDB0060281|HMDB0041109|HMDB0032565|HMDB0030397|HMDB0029439|HMDB0029157|HMDB0029016|HMDB0028864|HMDB0028827|HMDB0014336|HMDB0013319|HMDB0006875|HMDB0004076|HMDB0001301|HMDB0000245	3-Hydroxykynurenamine|(S)-3-Ethylidenehexahydropyrrolo[1,2-a]pyrazine-1,4-dione|(4-Ethoxyphenyl)urea|L-2-Amino-3-(4-aminophenyl)propanoic acid|(2S,4S)-Pinnatanine|gamma-Glutamylproline|Prolyl-Glutamate|Hydroxyprolyl-Hydroxyproline|Glutamylproline|Carbidopa|Tyrosinamide|1-Pyrroline-2-carboxylic acid|5-Hydroxykynurenamine|1-Pyrroline-5-carboxylic acid|Porphobilinogen	26.9|37|29.7|27|28.5|36.4|43.2|40.7|44.4|27.7|26.6|31.1|26.9|38.1|45.2	15	M+FA-H | M-H2O-H | M-H2O-H | M-H2O-H | M-H2O-H | 2M-H | 2M-H | M-H	C9H12N2O2 | C10H16N2O5 | C10H16N2O5 | C10H16N2O5 | C10H16N2O5 | C5H7NO2 | C5H7NO2 | C10H14N2O4	46.6 | 46.1 | 47.5 | 47 | 47.7 | 45.7 | 47.1 | 47.9	-0.46135286063957 | -0.340352006542427 | -0.340352006542427 | -0.340352006542427 | -0.340352006542427 | -0.36748317760861 | -0.36748317760861 | -0.367483177734316	96.393695423201 | 94.5831340739291 | 94.5831340739291 | 94.5831340739291 | 94.5831340739291 | 97.95783628321 | 97.95783628321 | 94.8325626980567		225.088	1	2.2994	0.245233	8985.1	9407.3	9304.39	9172.12	9345.88	8432.82	6102.01	5982.73	6625.27	6834.21	5897.87	10910.9	12409.5	13584.6	11180.9	13568.4	7024.34	7081.12	5843.29	6565.87	6212.89	10540.4	12339.3	13452.3	12873.5	10756.7		1.04088	0.427617	0.171796
7.52_347.0187m/z	L3	HMDB0140674 | HMDB0140673 | HMDB0140672 | HMDB0129414 | HMDB0128436 | HMDB0128434 | HMDB0128433 | HMDB0029783	12,16-dihydroxy-5,7,9,21-tetraoxahexacyclo[11.8.0.0Â²,Â¹â°.0Â³,â¸.0â´,â¶.0Â¹âµ,Â²â°]henicosa-1(13),2(10),11,15,17,19-hexaen-14-one | 11,15,16-trihydroxy-6,8,20-trioxapentacyclo[10.8.0.0Â²,â¹.0Â³,â·.0Â¹â´,Â¹â¹]icosa-1(12),2(9),4,10,14(19),15,17-heptaen-13-one | 11,15,17-trihydroxy-6,8,20-trioxapentacyclo[10.8.0.0Â²,â¹.0Â³,â·.0Â¹â´,Â¹â¹]icosa-1(12),2(9),4,10,14,16,18-heptaen-13-one | …	8	Endogenous|Food	HMDB0140674|HMDB0140673|HMDB0140672|HMDB0129414|HMDB0128436|HMDB0128434|HMDB0128433|HMDB0029783	12,16-dihydroxy-5,7,9,21-tetraoxahexacyclo[11.8.0.0Â²,Â¹â°.0Â³,â¸.0â´,â¶.0Â¹âµ,Â²â°]henicosa-1(13),2(10),11,15,17,19-hexaen-14-one|11,15,16-trihydroxy-6,8,20-trioxapentacyclo[10.8.0.0Â²,â¹.0Â³,â·.0Â¹â´,Â¹â¹]icosa-1(12),2(9),4,10,14(19),15,17-heptaen-13-one|11,15,17-trihydroxy-6,8,20-trioxapentacyclo[10.8.0.0Â²,â¹.0Â³,â·.0Â¹â´,Â¹â¹]icosa-1(12),2(9),4,10,14,16,18-heptaen-13-one|6-(1-b…	64.3|64.3|64.3|72.2|72.3|72.3|72.3|72	8	M+Na-2H | M+Na-2H | M+Na-2H | M+K-2H | M+Na-2H | M+Na-2H | M+Na-2H | M+K-2H	C17H10O7 | C17H10O7 | C17H10O7 | C14H14O8 | C17H10O7 | C17H10O7 | C17H10O7 | C14H14O8	48.7 | 48.7 | 48.7 | 50.8 | 50.3 | 50.3 | 50.3 | 50.8	4.1161249254321 | 4.1161249254321 | 4.1161249254321 | 3.83748442513757 | 4.1161249254321 | 4.1161249254321 | 4.1161249254321 | 3.83748442513757	84.0759757398528 | 84.0759757398528 | 84.0759757398528 | 86.5802057660847 | 84.0759757398528 | 84.0759757398528 | 84.0759757398528 | 86.5802057660847		347.019	1	7.52425	0.105083	4788.56	3934.99	4246.13	4543	4133.72	6331.82	11015.8	10256	10283.5	9764.87	9843.32	6627.77	6185.7	5731	6840.25	6498.26	3602.1	3269.1	2943.65	3172.47	3539.16	4174.94	3157.5	2226.51	1325.44	3085.21		-3.09586	4.39e-09	6.38e-08
2.65_222.0408m/z	L3	HMDB0129380 | HMDB0128056 | HMDB0128045 | HMDB0128021 | HMDB0040612 | HMDB0039495 | HMDB0038941 | HMDB0004083	2-{[(2H-1,3-benzodioxol-5-yl)(hydroxy)methylidene]amino}acetic acid | 2-{[(2,4-dihydroxy-3-methoxyphenyl)(hydroxy)methylidene]amino}acetic acid | 2-{[(2,4-dihydroxy-5-methoxyphenyl)(hydroxy)methylidene]amino}acetic acid | 2-{[(3,4-dihydroxy-5-methoxyphenyl)(hydroxy)methylidene]amino}acetic acid | 4-Acetyl-2(3H)-benzoxazolone | 2-(Malonylamino)benzoic acid | (R)-2,3-Dihydro-3,5-dihydroxy-2-oxo-3-i…	8	Endogenous|Food	HMDB0134934|HMDB0134933|HMDB0134932|HMDB0134931|HMDB0129380|HMDB0128056|HMDB0128045|HMDB0128021|HMDB0040612|HMDB0039495|HMDB0038941|HMDB0037549|HMDB0037548|HMDB0004083	4-hydroxy-1H-indole-3-carboxylic acid|7-hydroxy-1H-indole-3-carboxylic acid|6-hydroxy-1H-indole-3-carboxylic acid|5-hydroxy-1H-indole-3-carboxylic acid|2-{[(2H-1,3-benzodioxol-5-yl)(hydroxy)methylidene]amino}acetic acid|2-{[(2,4-dihydroxy-3-methoxyphenyl)(hydroxy)methylidene]amino}acetic acid|2-{[(2,4-dihydroxy-5-methoxyphenyl)(hydroxy)methylidene]amino}acetic acid|2-{[(3,4-dihydroxy-5-methoxyphe…	26.9|26.9|26.9|26.9|35.3|36|36.2|36|44.2|37.5|37.5|3.89|3.89|33	14	M-H | M-H2O-H | M-H2O-H | M-H2O-H | M+FA-H | M-H | M-H | M-H	C10H9NO5 | C10H11NO6 | C10H11NO6 | C10H11NO6 | C9H7NO3 | C10H9NO5 | C10H9NO5 | C10H9NO5	46.4 | 46.5 | 46.5 | 46.5 | 48.5 | 46.8 | 46.8 | 45.9	-0.0300440513950381 | -0.0277814885808945 | -0.0277814885808945 | -0.0277814885808945 | -0.0378440442719508 | -0.0300440513950381 | -0.030044051267614 | -0.030044051267614	96.5828324449696 | 96.3291272750168 | 96.3291272750168 | 96.3291272750168 | 98.1875942311118 | 96.5828324449696 | 96.5828324449696 | 96.5828324449696		222.041	1	2.6498	0.267517	4103.36	4369.65	4194.02	4263.71	4228.3	3854.34	12710.1	23824.1	20811.1	12757.3	26883.6	15.9801	3.79053	13.7143	0	0	0	2.69714	4.08939	0	0	0	60.8067	45.8769	56.0849	0.772314		-14291	4.91e-08	3.28e-07
6.77_148.0366n	L3	HMDB0062739 | HMDB0059655 | HMDB0011676 | HMDB0001900 | HMDB0000694 | HMDB0000606 | HMDB0000428 | HMDB0000426	3-methylmalate(2-) | 2-Hydroxyglutarate | D-Xylono-1,5-lactone | Ribonolactone | L-2-Hydroxyglutaric acid | D-2-Hydroxyglutaric acid | 3-Hydroxyglutaric acid | Citramalic acid	8	Endogenous|Food	HMDB0062739|HMDB0059655|HMDB0011676|HMDB0001900|HMDB0000694|HMDB0000606|HMDB0000428|HMDB0000426	3-methylmalate(2-)|2-Hydroxyglutarate|D-Xylono-1,5-lactone|Ribonolactone|L-2-Hydroxyglutaric acid|D-2-Hydroxyglutaric acid|3-Hydroxyglutaric acid|Citramalic acid	26|26.8|26.6|26.6|26.8|26.8|26.8|26	8	M-H2O-H, M-H	C5H8O5	43.8 | 44 | 44 | 44 | 44 | 44 | 44 | 43.8	-3.83825744357408 | -3.83825744357408 | -3.83825744357408 | -3.83825744338209 | -3.83825744338209 | -3.83825744338209 | -3.83825744357408 | -3.83825744338209	97.6936	148.037	147.029	1	6.77408	0.829783	22808	25784.8	25325.2	24952.6	25792.8	19213.6	15846.7	18016.3	16408.8	16778.8	20905.7	17127	24525.7	19272.3	20252.4	21138.3	45632.5	30090.3	78716.8	42716.7	34040.6	37360.4	15543.4	20602.9	20945.5	21715.6		2.62854	0.000753014	0.000809797
2.06_230.1034m/z	L3	HMDB0094731 | HMDB0094730 | HMDB0094729 | HMDB0094728 | HMDB0006548 | HMDB0006348 | HMDB0000953 | HMDB0000726	5-Hepteneoylglycine | 4-Hepteneoylglycine | 3-Hepteneoylglycine | 2-Hepteneoylglycine | Ecgonine | Pseudoecgonine | Suberylglycine | Isovalerylglutamic acid	8	Endogenous	HMDB0094731|HMDB0094730|HMDB0094729|HMDB0094728|HMDB0014494|HMDB0006548|HMDB0006348|HMDB0000953|HMDB0000726	5-Hepteneoylglycine|4-Hepteneoylglycine|3-Hepteneoylglycine|2-Hepteneoylglycine|Minoxidil|Ecgonine|Pseudoecgonine|Suberylglycine|Isovalerylglutamic acid	50.4|47.8|47.8|48.1|11.8|48.7|48.8|51.5|48.7	9	M+FA-H | M+FA-H | M+FA-H | M+FA-H | M+FA-H | M+FA-H | M-H | M-H	C9H15NO3 | C9H15NO3 | C9H15NO3 | C9H15NO3 | C9H15NO3 | C9H15NO3 | C10H17NO5 | C10H17NO5	49.5 | 48.9 | 48.9 | 49 | 49.1 | 49.2 | 49.4 | 48.8	-0.242289300383998 | -0.242289300383998 | -0.242289300383998 | -0.242289300230455 | -0.242289300230455 | -0.242289300230455 | -0.194064026735983 | -0.19406402698194	97.2432660665264 | 97.2432660665264 | 97.2432660665264 | 97.2432660665264 | 97.2432660665264 | 97.2432660665264 | 95.6531781589102 | 95.6531781589102		230.103	1	2.06293	0.197067	6076.2	6816.06	6396.53	6286.9	6359.44	5154.25	5728.87	5630.81	5391.78	6359.57	5795.75	8304.66	8215.27	8539.88	8723.83	8993.26	4358.3	4313.3	4317.95	5490.89	4988.07	6917.15	5908.78	6857.98	6402.05	6564.78		-1.23173	0.00532454	0.0043282
1.99_222.0771m/z	L3	HMDB0094727 | HMDB0094726 | HMDB0094725 | HMDB0094724 | HMDB0040045 | HMDB0013068 | HMDB0012490 | HMDB0000866	6-hydroxyphenylpropionylglycine | 5-hydroxyphenylpropionylglycine | 4-hydroxyphenylpropionylglycine | 3-hydroxyphenylpropionylglycine | 5-[2H-Pyrrol-4-(3H)-ylidenemethyl]-2-furanmethanol | Salsolinol 1-carboxylate | 1,2-Dehydrosalsolinol | N-Acetyl-L-tyrosine	8	Endogenous|Food	HMDB0094727|HMDB0094726|HMDB0094725|HMDB0094724|HMDB0094723|HMDB0060063|HMDB0040045|HMDB0037693|HMDB0035170|HMDB0033482|HMDB0014567|HMDB0013068|HMDB0012490|HMDB0001855|HMDB0000866	6-hydroxyphenylpropionylglycine|5-hydroxyphenylpropionylglycine|4-hydroxyphenylpropionylglycine|3-hydroxyphenylpropionylglycine|2-hydroxyphenylpropionylglycine|N,N-dimethylindoliumolate|5-[2H-Pyrrol-4-(3H)-ylidenemethyl]-2-furanmethanol|2-Propenyl 2-aminobenzoate|1',2'-Dihydro-1,1'-dimethyl-2'-oxo-4,4'-bipyridinium(1+)|Plantagonine|Methocarbamol|Salsolinol 1-carboxylate|1,2-Dehydrosalsolinol|5-Hy…	32.5|31.8|31.8|31.8|25.9|25.3|41.2|19.1|10.8|24.9|12|31.9|30.8|25.3|37	15	M-H | M-H | M-H | M-H | M+FA-H | M-H | M+FA-H | M-H	C11H13NO4 | C11H13NO4 | C11H13NO4 | C11H13NO4 | C10H11NO2 | C11H13NO4 | C10H11NO2 | C11H13NO4	45.5 | 45.4 | 45.4 | 45.4 | 47.6 | 45.4 | 45.5 | 46.5	-0.475033599114188 | -0.475033599114188 | -0.475033599114188 | -0.475033599114188 | -0.598441180103958 | -0.475033598986785 | -0.598441179943455 | -0.475033599114188	95.7911047269116 | 95.7911047269116 | 95.7911047269116 | 95.7911047269116 | 97.372741251084 | 95.7911047269116 | 97.372741251084 | 95.7911047269116		222.077	1	1.99288	0.21895	10209.3	10740.6	10494	10061.7	11196.2	8513.27	12945.8	28871.4	24130.1	13431	27869.6	7021.4	7114.77	6820.71	7768.79	7468.46	7286.76	7284.24	6722.16	8948.97	9143.07	7793.58	7979.36	9123.96	8876.79	9062.06		-2.72305	0.000966977	0.00100433
8.90_233.0779m/z	L3	HMDB0029158 | HMDB0029038 | HMDB0028842 | HMDB0028828 | HMDB0028763 | HMDB0011173 | HMDB0011169 | HMDB0006029	gamma-Glutamylserine | Serylglutamic acid | Glycyl-Hydroxyproline | Glutamylserine | Aspartyl-Threonine | L-glycyl-L-hydroxyproline | L-beta-aspartyl-L-threonine | N-Acetylglutamine	8	Endogenous	HMDB0038850|HMDB0029158|HMDB0029057|HMDB0029038|HMDB0028842|HMDB0028828|HMDB0028763|HMDB0012249|HMDB0011173|HMDB0011169|HMDB0006454|HMDB0006029|HMDB0000532	Cycasin|gamma-Glutamylserine|Threoninyl-Aspartate|Serylglutamic acid|Glycyl-Hydroxyproline|Glutamylserine|Aspartyl-Threonine|L-Aspartate-semialdehyde|L-glycyl-L-hydroxyproline|L-beta-aspartyl-L-threonine|L-2-Amino-3-oxobutanoic acid|N-Acetylglutamine|Acetylglycine	27.6|46.7|23.8|42.7|49.7|43.7|34.8|19.3|49.7|35.1|12.3|35.5|12	13	M-H | M-H | M+FA-H | M-H | M-H | M+FA-H | M-H | M+FA-H	C8H14N2O6 | C8H14N2O6 | C7H12N2O4 | C8H14N2O6 | C8H14N2O6 | C7H12N2O4 | C8H14N2O6 | C7H12N2O4	47.2 | 46.5 | 48.1 | 46.6 | 44.9 | 48.1 | 44.9 | 45.3	0.15200224969256 | 0.15200224969256 | 0.189189655437822 | 0.15200224969256 | 0.15200224969256 | 0.189189655437822 | 0.15200224969256 | 0.189189655437822	89.7196675338133 | 89.7196675338133 | 91.2121503186587 | 89.7196675338133 | 89.7196675338133 | 91.2121503186587 | 89.7196675338133 | 91.2121503186587		233.078	1	8.8996	0.236767	22825.9	23603.9	23490.8	21974.2	21638.2	18768.4	5500.51	6320.57	5476.35	5955.18	9519.29	11723.3	12947.6	11832.9	13072.3	12243.9	22278.6	22497.8	20524.7	32625.7	29760.6	40813.7	33430.6	34547.3	38455.9	39600.2		3.89625	8.61e-06	1.81e-05
1.91_241.1195m/z	L3	HMDB0040551 | HMDB0029741 | HMDB0028928 | HMDB0028906 | HMDB0028823 | HMDB0028822 | HMDB0011171 | HMDB0011170	L-alpha-Amino-1H-pyrrole-1-hexanoic acid | 2-Isopropyl-3,5-dimethoxy-6-methylpyrazine | Leucyl-Glutamate | Isoleucyl-Glutamate | Glutamylleucine | Glutamylisoleucine | gamma-Glutamylleucine | gamma-Glutamylisoleucine	8	Endogenous|Food	HMDB0040551|HMDB0029741|HMDB0028928|HMDB0028906|HMDB0028823|HMDB0028822|HMDB0011171|HMDB0011170	L-alpha-Amino-1H-pyrrole-1-hexanoic acid|2-Isopropyl-3,5-dimethoxy-6-methylpyrazine|Leucyl-Glutamate|Isoleucyl-Glutamate|Glutamylleucine|Glutamylisoleucine|gamma-Glutamylleucine|gamma-Glutamylisoleucine	27.6|20.9|34.8|34.8|35.1|35.1|21.3|21.3	8	M+FA-H | M+FA-H | M-H2O-H | M-H2O-H | M-H2O-H | M-H2O-H | M-H2O-H | M-H2O-H	C10H16N2O2 | C10H16N2O2 | C11H20N2O5 | C11H20N2O5 | C11H20N2O5 | C11H20N2O5 | C11H20N2O5 | C11H20N2O5	44.9 | 43.5 | 46 | 46 | 46 | 46 | 43.3 | 43.3	0.604989292913076 | 0.604989293057995 | 0.456121780175139 | 0.456121780175139 | 0.456121780175139 | 0.456121780175139 | 0.456121780175139 | 0.456121780175139	97.4607595143031 | 97.4607595143031 | 95.6226011530249 | 95.6226011530249 | 95.6226011530249 | 95.6226011530249 | 95.6226011530249 | 95.6226011530249		241.119	1	1.91405	0.267117	15271.1	15590.3	15229.1	15639	15467.2	14636.9	9989.46	9943.41	10878.3	10704.8	9502.01	17620.1	20626.9	20933.1	18309.8	21848.1	12734.8	11245.8	10648.6	12155.9	10934.9	18562.9	17290.6	20477	19423.3	18066.8		1.13137	0.0191053	0.012843
2.86_213.0880m/z	L3	HMDB0029393 | HMDB0029123 | HMDB0029062 | HMDB0028873 | HMDB0028766 | HMDB0012161 | HMDB0001431 | HMDB0001199	L-N-(3-Carboxypropyl)glutamine | Valyl-Aspartate | Threoninyl-Hydroxyproline | Hydroxyprolyl-Threonine | Aspartyl-Valine | 4-(Glutamylamino) butanoate | Pyridoxamine | N2-Succinyl-L-ornithine	8	Endogenous|Food	HMDB0029393|HMDB0029123|HMDB0029062|HMDB0028873|HMDB0028766|HMDB0012161|HMDB0001431|HMDB0001199	L-N-(3-Carboxypropyl)glutamine|Valyl-Aspartate|Threoninyl-Hydroxyproline|Hydroxyprolyl-Threonine|Aspartyl-Valine|4-(Glutamylamino) butanoate|Pyridoxamine|N2-Succinyl-L-ornithine	31.5|27.7|29.8|28.2|28.9|31.5|27.1|28.9	8	M-H2O-H | M-H2O-H | M-H2O-H | M-H2O-H | M-H2O-H | M-H2O-H | M+FA-H | M-H2O-H	C9H16N2O5 | C9H16N2O5 | C9H16N2O5 | C9H16N2O5 | C9H16N2O5 | C9H16N2O5 | C8H12N2O2 | C9H16N2O5	44 | 43.2 | 43.7 | 43.4 | 43.5 | 44 | 43.4 | 43.5	-0.34426990176343 | -0.34426990176343 | -0.34426990176343 | -0.34426990176343 | -0.34426990176343 | -0.34426990176343 | -0.475401160227359 | -0.34426990176343	88.9566327003369 | 88.9566327003369 | 88.9566327003369 | 88.9566327003369 | 88.9566327003369 | 88.9566327003369 | 90.6533473110879 | 88.9566327003369		213.088	1	2.85605	0.289333	11214.4	11578.2	11452.9	11341.9	11521.3	10307.7	7408.13	7508.67	7804.23	8155.84	7524.85	13460.8	15327.8	15567.2	13919.6	15459.4	8955.3	8613.9	8217.02	8959.58	8288.04	13937.7	13087.4	15140.3	14706.1	13143.7		1.12062	0.00202914	0.00190216
8.64_300.0493m/z	L3	HMDB0062500 | HMDB0059626 | HMDB0032294 | HMDB0006480 | HMDB0002817 | HMDB0001367 | HMDB0001121 | HMDB0001062	N-Acetylmannosamine-6P | N-acetyl-alpha-D-galactosamine 1-phosphate | N-Gluconyl ethanolamine phosphate | N-Acetyl-D-galactosamine 1-phosphate | N-Acetylglucosamine 6-phosphate | N-Acetyl-glucosamine 1-phosphate | N-Acetyl-D-mannosamine 6-phosphate | N-Acetyl-D-Glucosamine 6-Phosphate	8	Endogenous|Food	HMDB0062500|HMDB0059626|HMDB0040292|HMDB0032294|HMDB0029294|HMDB0029234|HMDB0006480|HMDB0002817|HMDB0001367|HMDB0001121|HMDB0001062	N-Acetylmannosamine-6P|N-acetyl-alpha-D-galactosamine 1-phosphate|Imidacloprid|N-Gluconyl ethanolamine phosphate|Caffeoyl aspartic acid|N-[4'-hydroxy-(E)-cinnamoyl]-L-aspartic acid|N-Acetyl-D-galactosamine 1-phosphate|N-Acetylglucosamine 6-phosphate|N-Acetyl-glucosamine 1-phosphate|N-Acetyl-D-mannosamine 6-phosphate|N-Acetyl-D-Glucosamine 6-Phosphate	30.5|30.2|0|22.6|9.49|9.49|30.2|30.5|30.2|30.5|30.5	11	M-H | M-H | M-H2O-H | M-H | M-H | M-H | M-H | M-H	C8H16NO9P | C8H16NO9P | C8H18NO10P | C8H16NO9P | C8H16NO9P | C8H16NO9P | C8H16NO9P | C8H16NO9P	45 | 44.9 | 43.4 | 44.9 | 45 | 44.9 | 45 | 45	1.09633850815028 | 1.09633850815028 | 1.03446628066101 | 1.09633850815028 | 1.09633850815028 | 1.09633850815028 | 1.09633850815028 | 1.09633850815028	95.6530650037988 | 95.6530650037988 | 95.4030507150615 | 95.6530650037988 | 95.6530650037988 | 95.6530650037988 | 95.6530650037988 | 95.6530650037988		300.049	1	8.64098	0.4688	25138	26010.6	26053.2	27041.3	26935.9	25654.6	53499.2	48272	49225.7	49851.6	56901.8	21332	21103.4	21555.7	23613.2	20682.3	12089.9	11389.6	11616.6	10626.2	12636.9	15362.8	26060.3	29231.2	26529.9	22544.5		-4.41662	4.67e-10	1.3e-08
7.71_217.0829m/z	L3	HMDB0036301 | HMDB0029040 | HMDB0028872 | HMDB0028686 | HMDB0011178 | HMDB0006248 | HMDB0003764 | HMDB0000721	N-gamma-L-Glutamyl-D-alanine | Serinyl-Hydroxyproline | Hydroxyprolyl-Serine | Alanyl-Glutamic acid | Prolylglycine | gamma-Glutamylalanine | Glutamylalanine | Glycylproline	8	Endogenous|Food	HMDB0036301|HMDB0029040|HMDB0028872|HMDB0028686|HMDB0011178|HMDB0006248|HMDB0006239|HMDB0003764|HMDB0000721	N-gamma-L-Glutamyl-D-alanine|Serinyl-Hydroxyproline|Hydroxyprolyl-Serine|Alanyl-Glutamic acid|Prolylglycine|gamma-Glutamylalanine|S-aminomethyldihydrolipoamide|Glutamylalanine|Glycylproline	56.3|55.4|51.5|53.4|54.9|56.4|0|56.4|51.9	9	M-H | M-H | M-H | M-H | M+FA-H | M-H | M-H | M+FA-H	C8H14N2O5 | C8H14N2O5 | C8H14N2O5 | C8H14N2O5 | C7H12N2O3 | C8H14N2O5 | C8H14N2O5 | C7H12N2O3	49.1 | 48.9 | 48.1 | 48.5 | 49.1 | 49.1 | 49.1 | 48.5	-0.626220083259039 | -0.626220083259039 | -0.626220083259039 | -0.626220083259039 | -0.793627642537381 | -0.626220083259039 | -0.626220083259039 | -0.793627642537381	89.9483754838388 | 89.9483754838388 | 89.9483754838388 | 89.9483754838388 | 91.4307781550131 | 89.9483754838388 | 89.9483754838388 | 91.4307781550131		217.083	1	7.70818	0.201517	17895.3	19062	19170	18537.4	19207.3	16188.4	5885.78	7058.46	6736.98	5890.13	6437.42	11053.1	14633.6	13136.7	11589.6	13991.3	23297.9	21519.9	20539	24286	19705.6	36006.9	30106.9	34375.5	28839.1	29168		3.4162	1.27e-08	1.45e-07
8.45_275.0889m/z	L3	HMDB0042036 | HMDB0039110 | HMDB0031701 | HMDB0029756 | HMDB0028818 | HMDB0028761 | HMDB0011737 | HMDB0002335	Thymidine glycol | (2S,3'S)-alpha-Amino-2-carboxy-5-oxo-1-pyrrolidinebutanoic acid | 1-(gamma-Glutamylamino)cyclopropanecarboxylic acid | (1R,2S,3R)-2-Acetyl-4(5)-(1,2,3,4-tetrahydroxybutyl)imidazole | Glutamylglutamic acid | Aspartyl-Proline | gamma-Glutamylglutamic acid | Aspartyl-L-proline	8	Endogenous|Food	HMDB0042036|HMDB0039110|HMDB0038753|HMDB0038752|HMDB0032796|HMDB0031701|HMDB0029756|HMDB0029013|HMDB0028818|HMDB0028761|HMDB0011737|HMDB0002335	Thymidine glycol|(2S,3'S)-alpha-Amino-2-carboxy-5-oxo-1-pyrrolidinebutanoic acid|Distichonic acid B|Distichonic acid A|Methyl 3-(2,3-dihydroxy-3-methylbutyl)-4-hydroxybenzoate|1-(gamma-Glutamylamino)cyclopropanecarboxylic acid|(1R,2S,3R)-2-Acetyl-4(5)-(1,2,3,4-tetrahydroxybutyl)imidazole|Prolyl-Aspartate|Glutamylglutamic acid|Aspartyl-Proline|gamma-Glutamylglutamic acid|Aspartyl-L-proline	47.4|58.2|30.2|30.2|30|58.6|52.3|36.4|54.5|46.3|54.5|46.2	12	M-H | M+FA-H | M+FA-H | M+FA-H | M-H | M+FA-H | M-H | M+FA-H	C10H16N2O7 | C9H14N2O5 | C9H14N2O5 | C9H14N2O5 | C10H16N2O7 | C9H14N2O5 | C10H16N2O7 | C9H14N2O5	47.8 | 50.2 | 50.3 | 49.1 | 49.3 | 47.9 | 49.3 | 47.8	1.56762645162005 | 1.88107154344012 | 1.88107154344012 | 1.88107154331659 | 1.56762645182593 | 1.88107154344012 | 1.56762645182593 | 1.88107154344012	93.7621119838827 | 95.2525003618287 | 95.2525003618287 | 95.2525003618287 | 93.7621119838827 | 95.2525003618287 | 93.7621119838827 | 95.2525003618287		275.089	1	8.45268	0.810833	13912.2	14567	14008.7	13968.4	14233.7	13256.8	8411.61	8470.7	8680.55	8744.52	11840.3	13168.4	13053	11697.9	14696.4	13045.8	20492.3	17179.8	16285.6	21114.6	23041.9	21550	14497.2	14296.7	15354.3	16329.1		2.1261	3.65e-05	6.02e-05
7.11_246.1217n	L3	HMDB0029126 | HMDB0028925 | HMDB0028903 | HMDB0028832 | HMDB0028757 | HMDB0028756 | HMDB0011172 | HMDB0011166	Valyl-Glutamate | Leucyl-Aspartate | Isoleucyl-Aspartate | Glutamylvaline | Aspartyl-Leucine | Aspartyl-Isoleucine | gamma-Glutamylvaline | L-beta-aspartyl-L-leucine	8	Endogenous|Food	HMDB0029126|HMDB0028925|HMDB0028903|HMDB0028832|HMDB0028757|HMDB0028756|HMDB0011172|HMDB0011166	Valyl-Glutamate|Leucyl-Aspartate|Isoleucyl-Aspartate|Glutamylvaline|Aspartyl-Leucine|Aspartyl-Isoleucine|gamma-Glutamylvaline|L-beta-aspartyl-L-leucine	48.8|42|42|53|43.1|49.2|53.9|49.4	8	M-H, M+Na-2H	C10H18N2O5	47.4 | 46.1 | 46.1 | 48.3 | 46.3 | 47.5 | 48.4 | 47.5	0.402355	88.7789	246.122	245.114	1	7.11212	0.373167	61422.6	65203.1	62334.3	62837.8	62583	54988.3	86144.1	87095.3	89228.4	89688	151695	86448.8	87332.5	75362.2	94189.8	78550.5	40886	32686.6	49544	40395.5	42670.5	42259.1	27922.6	33308.5	36831.1	38478.5		-2.44371	0.000130991	0.000184136
6.96_245.1144m/z	L3	HMDB0029126 | HMDB0028925 | HMDB0028903 | HMDB0028832 | HMDB0028757 | HMDB0028756 | HMDB0011172 | HMDB0011166	Valyl-Glutamate | Leucyl-Aspartate | Isoleucyl-Aspartate | Glutamylvaline | Aspartyl-Leucine | Aspartyl-Isoleucine | gamma-Glutamylvaline | L-beta-aspartyl-L-leucine	8	Endogenous|Food	HMDB0029126|HMDB0028925|HMDB0028903|HMDB0028832|HMDB0028757|HMDB0028756|HMDB0011172|HMDB0011166	Valyl-Glutamate|Leucyl-Aspartate|Isoleucyl-Aspartate|Glutamylvaline|Aspartyl-Leucine|Aspartyl-Isoleucine|gamma-Glutamylvaline|L-beta-aspartyl-L-leucine	49.4|43.4|43.4|52|44.7|48.2|52.2|48.2	8	M-H	C10H18N2O5	47.3 | 46.1 | 46.1 | 47.8 | 46.4 | 47.1 | 47.9 | 47.1	0.61277	88.0064		245.114	1	6.95867	0.166967	17298.3	19388.4	19023.4	17891.4	18573.9	14631.1	6795.89	7709.26	7983.76	8108.6	6524.35	14890.6	19536.4	21354.1	15109.3	20351.8	15288.1	13416.3	14060	16340.4	13717.9	33178.7	30295	51031.1	42666.9	32745.2		1.96172	2.52e-06	6.54e-06
5.46_213.1243m/z	L3	HMDB0029135 | HMDB0029065 | HMDB0029064 | HMDB0029030 | HMDB0028939 | HMDB0028917 | HMDB0013075 | HMDB0003581	Valyl-Proline | Threoninyl-Leucine | Threoninyl-Isoleucine | Prolyl-Valine | Leucyl-Threonine | Isoleucyl-Threonine | Spermic acid 2 | Dethiobiotin	8	Endogenous|Food	HMDB0029135|HMDB0029065|HMDB0029064|HMDB0029030|HMDB0028939|HMDB0028917|HMDB0013075|HMDB0003581	Valyl-Proline|Threoninyl-Leucine|Threoninyl-Isoleucine|Prolyl-Valine|Leucyl-Threonine|Isoleucyl-Threonine|Spermic acid 2|Dethiobiotin	25.1|12.9|12.9|24.3|13.4|13.4|13.8|12.1	8	M-H | M-H2O-H | M-H2O-H | M-H | M-H2O-H | M-H2O-H | M-H2O-H | M-H	C10H18N2O3 | C10H20N2O4 | C10H20N2O4 | C10H18N2O3 | C10H20N2O4 | C10H20N2O4 | C10H20N2O4 | C10H18N2O3	42.6 | 40.1 | 40.1 | 42.4 | 40.2 | 40.2 | 40.3 | 40	-0.613423939659358 | -0.565813438765719 | -0.565813438765719 | -0.613423939659358 | -0.565813438765719 | -0.565813438765719 | -0.565813438765719 | -0.613423939792088	88.5037441902149 | 88.1972209166511 | 88.1972209166511 | 88.5037441902149 | 88.1972209166511 | 88.1972209166511 | 88.1972209166511 | 88.5037441902149		213.124	1	5.45855	0.306933	20431.3	21427.2	21353.7	22106.3	22547.8	18968	5094.57	5280.79	5116.35	5611.69	3950.72	13283.4	15054	16170.5	12831.6	16014.6	29112.9	32039	25499.4	27640.7	24808.8	34588.2	37257.7	42561.8	38891.1	35215.8		5.55201	1.55e-08	1.58e-07
5.47_229.0829m/z	L3	HMDB0039110 | HMDB0031701 | HMDB0029756 | HMDB0029159 | HMDB0029060 | HMDB0029013 | HMDB0028829 | HMDB0028761 | HMDB0002335	(2S,3'S)-alpha-Amino-2-carboxy-5-oxo-1-pyrrolidinebutanoic acid | 1-(gamma-Glutamylamino)cyclopropanecarboxylic acid | (1R,2S,3R)-2-Acetyl-4(5)-(1,2,3,4-tetrahydroxybutyl)imidazole | gamma-Glutamylthreonine | Threoninyl-Glutamate | Prolyl-Aspartate | Glutamylthreonine | Aspartyl-Proline | Aspartyl-L-proline	9	Endogenous|Food	HMDB0040331|HMDB0039110|HMDB0032345|HMDB0031701|HMDB0031328|HMDB0029756|HMDB0029159|HMDB0029060|HMDB0029013|HMDB0028829|HMDB0028761|HMDB0002335	xi-2,5-Dihydro-2,4-dimethylthiazole|(2S,3'S)-alpha-Amino-2-carboxy-5-oxo-1-pyrrolidinebutanoic acid|Isobutyl isothiocyanate|1-(gamma-Glutamylamino)cyclopropanecarboxylic acid|1-Isothiocyanatobutane|(1R,2S,3R)-2-Acetyl-4(5)-(1,2,3,4-tetrahydroxybutyl)imidazole|gamma-Glutamylthreonine|Threoninyl-Glutamate|Prolyl-Aspartate|Glutamylthreonine|Aspartyl-Proline|Aspartyl-L-proline	0|42.2|0|31.9|0|37.9|39.5|39.4|30.4|39.4|43.1|43.3	12	M-H | M-H | M-H | M-H2O-H | M-H2O-H | M-H | M-H2O-H | M-H | M-H	C9H14N2O5 | C9H14N2O5 | C9H14N2O5 | C9H16N2O6 | C9H16N2O6 | C9H14N2O5 | C9H16N2O6 | C9H14N2O5 | C9H14N2O5	47.6 | 45.6 | 46.8 | 47.1 | 47 | 45.3 | 47 | 47.8 | 47.9	-0.312704975740087 | -0.312704975740087 | -0.312704975863611 | -0.28998722402436 | -0.28998722402436 | -0.312704975740087 | -0.28998722402436 | -0.312704975740087 | -0.312704975740087	96.4498350758347 | 96.4498350758347 | 96.4498350758347 | 96.196357343054 | 96.196357343054 | 96.4498350758347 | 96.196357343054 | 96.4498350758347 | 96.4498350758347		229.083	1	5.47168	0.144917	4909.29	5064.59	5177.68	5319.86	5395.97	4624.94	3176.38	3267.98	3478.46	3516.21	3329.63	5911.69	6914.12	7275.1	6305.77	7387.82	3712	3456.44	3217.73	3894.24	3387.07	5648.52	6486.39	8509.36	7493.57	6451.74		1.0536	0.228313	0.104633
4.05_229.0830m/z	L3	HMDB0039110 | HMDB0031701 | HMDB0029756 | HMDB0029159 | HMDB0029060 | HMDB0029013 | HMDB0028829 | HMDB0028761 | HMDB0002335	(2S,3'S)-alpha-Amino-2-carboxy-5-oxo-1-pyrrolidinebutanoic acid | 1-(gamma-Glutamylamino)cyclopropanecarboxylic acid | (1R,2S,3R)-2-Acetyl-4(5)-(1,2,3,4-tetrahydroxybutyl)imidazole | gamma-Glutamylthreonine | Threoninyl-Glutamate | Prolyl-Aspartate | Glutamylthreonine | Aspartyl-Proline | Aspartyl-L-proline	9	Endogenous|Food	HMDB0040331|HMDB0039110|HMDB0032345|HMDB0031701|HMDB0031328|HMDB0029756|HMDB0029159|HMDB0029060|HMDB0029013|HMDB0028829|HMDB0028761|HMDB0002335	xi-2,5-Dihydro-2,4-dimethylthiazole|(2S,3'S)-alpha-Amino-2-carboxy-5-oxo-1-pyrrolidinebutanoic acid|Isobutyl isothiocyanate|1-(gamma-Glutamylamino)cyclopropanecarboxylic acid|1-Isothiocyanatobutane|(1R,2S,3R)-2-Acetyl-4(5)-(1,2,3,4-tetrahydroxybutyl)imidazole|gamma-Glutamylthreonine|Threoninyl-Glutamate|Prolyl-Aspartate|Glutamylthreonine|Aspartyl-Proline|Aspartyl-L-proline	0|37.6|0|30.6|0|33.4|37.1|34.2|28.2|37.1|39.1|39.2	12	M-H | M-H | M-H | M-H2O-H | M-H2O-H | M-H | M-H2O-H | M-H | M-H	C9H14N2O5 | C9H14N2O5 | C9H14N2O5 | C9H16N2O6 | C9H16N2O6 | C9H14N2O5 | C9H16N2O6 | C9H14N2O5 | C9H14N2O5	45.3 | 43.9 | 44.5 | 45.2 | 44.6 | 43.4 | 45.2 | 45.6 | 45.6	-0.0135269822074702 | -0.0135269822074702 | -0.0135269823309943 | -0.0125276764515321 | -0.0125276764515321 | -0.0135269822074702 | -0.0125276764515321 | -0.0135269822074702 | -0.0135269822074702	88.946668307767 | 88.946668307767 | 88.946668307767 | 88.7129094858538 | 88.7129094858538 | 88.946668307767 | 88.7129094858538 | 88.946668307767 | 88.946668307767		229.083	1	4.04783	0.2369	11020.7	11628.4	11433.3	11559.8	11822.4	10665.9	7486.17	7649.1	7991.38	8247.19	7549.41	13504.8	15409.6	15477.1	14256.9	16451	9118.38	8160.24	8147.62	9198.31	8354.91	14554.9	13024.8	15087.1	14197.2	13584.6		1.10421	0.0165951	0.0114002
2.28_178.0258n	L3	HMDB0141200 | HMDB0141199 | HMDB0141198 | HMDB0136740 | HMDB0136739 | HMDB0130547 | HMDB0032951 | HMDB0032950 | HMDB0030819	3,8-dihydroxy-2H-chromen-2-one | 3,6-dihydroxy-2H-chromen-2-one | 3,7-dihydroxy-2H-chromen-2-one | 5,6-dihydroxy-2H-chromen-2-one | 5,7-dihydroxy-2H-chromen-2-one | 7,8-dihydroxy-2H-chromen-2-one | 4,7-Dihydroxy-2H-1-benzopyran-2-one | 5,7-Dihydroxy-4H-1-benzopyran-4-one | Aesculetin	9	Endogenous|Food	HMDB0141200|HMDB0141199|HMDB0141198|HMDB0136740|HMDB0136739|HMDB0130547|HMDB0032951|HMDB0032950|HMDB0030819	3,8-dihydroxy-2H-chromen-2-one|3,6-dihydroxy-2H-chromen-2-one|3,7-dihydroxy-2H-chromen-2-one|5,6-dihydroxy-2H-chromen-2-one|5,7-dihydroxy-2H-chromen-2-one|7,8-dihydroxy-2H-chromen-2-one|4,7-Dihydroxy-2H-1-benzopyran-2-one|5,7-Dihydroxy-4H-1-benzopyran-4-one|Aesculetin	32.3|32.3|32.3|30.6|30.6|30.6|32.3|30.9|30.6	9	M-H2O-H, M-H	C9H6O4	43.2 | 43.2 | 43.2 | 42.9 | 42.9 | 42.9 | 43.2 | 42.9 | 42.9	-4.64286406325261 | -4.64286406325261 | -4.64286406325261 | -4.64286406325261 | -4.64286406325261 | -4.64286406325261 | -4.64286406325261 | -4.64286406325261 | -4.64286406309296	89.1029	178.026	159.008	1	2.28188	0.4598	62841.6	63928.3	64072.1	64985	63582	62837.3	78748.8	82265.3	73488	79622.8	76683	62346	63635.2	63364.4	62884.8	60844	72345.8	71226.7	75304.2	68663.2	79134	55730.1	54392.6	53635.3	54642.1	54851.7		-1.06582	0.0709411	0.0392184
2.18_188.0925m/z	L3	HMDB0094722 | HMDB0094721 | HMDB0094720 | HMDB0094719 | HMDB0094718 | HMDB0062181 | HMDB0038949 | HMDB0014634 | HMDB0004827	5-hydroxyhexanoylglycine | 4-hydroxyhexanoylglycine | 3-hydroxyhexanoylglycine | 2-hydroxyhexanoylglycine | 1-hydroxyhexanoylglycine | N-lactoyl-Valine | 3beta,6beta-Dihydroxynortropane | Miglitol | Proline betaine	9	Endogenous|Food	HMDB0094722|HMDB0094721|HMDB0094720|HMDB0094719|HMDB0094718|HMDB0062181|HMDB0038949|HMDB0036604|HMDB0030410|HMDB0014634|HMDB0004827	5-hydroxyhexanoylglycine|4-hydroxyhexanoylglycine|3-hydroxyhexanoylglycine|2-hydroxyhexanoylglycine|1-hydroxyhexanoylglycine|N-lactoyl-Valine|3beta,6beta-Dihydroxynortropane|N-Methylcalystegine B2|L-2-Amino-3-methylenehexanoic acid|Miglitol|Proline betaine	22.3|14.8|14.8|14.8|14.8|29.7|23.6|9.91|13.6|17|20.9	11	M-H | M-H | M-H | M-H | M-H | M-H | M+FA-H | M-H2O-H | M+FA-H	C8H15NO4 | C8H15NO4 | C8H15NO4 | C8H15NO4 | C8H15NO4 | C8H15NO4 | C7H13NO2 | C8H17NO5 | C7H13NO2	42.6 | 41.1 | 41.1 | 41.1 | 41.1 | 44.1 | 43 | 41.6 | 42.5	-1.95610173318502 | -1.95610173318502 | -1.95610173318502 | -1.95610173318502 | -1.95610173318502 | -1.95610173318502 | -2.58498723799854 | -1.78597628118076 | -2.58498723799854	93.2350587478975 | 93.2350587478975 | 93.2350587478975 | 93.2350587478975 | 93.2350587478975 | 93.2350587478975 | 94.6817778856155 | 92.917127487171 | 94.6817778856155		188.092	1	2.18117	0.175167	1876.78	1863.74	1817.07	1833.62	1875.46	1666.02	1927.86	1804.6	1579.96	1862.97	1464.33	1467.29	1536.83	1551.41	1231.18	1354.7	3325.32	3259.07	2697.94	2991.51	2443.97	1826.05	1476.93	1999.92	1903.48	1975.72		1.70351	0.000138263	0.00019208
10.07_258.0387m/z	L3	HMDB0062641 | HMDB0060436 | HMDB0001254 | HMDB0001129 | HMDB0001109 | HMDB0000853 | HMDB0000803 | HMDB0000215 | HMDB0000212	Aldehydo-N-acetyl-D-glucosamine | Aminofructose 6-phosphate | Glucosamine 6-phosphate | N-Acetylmannosamine | Glucosamine-1P | N-Acetyl-b-D-galactosamine | beta-N-Acetylglucosamine | N-Acetyl-D-glucosamine | N-Acetylgalactosamine	9	Endogenous|Food	HMDB0062641|HMDB0060436|HMDB0038942|HMDB0038751|HMDB0034251|HMDB0032357|HMDB0001254|HMDB0001129|HMDB0001109|HMDB0000853|HMDB0000803|HMDB0000215|HMDB0000212	Aldehydo-N-acetyl-D-glucosamine|Aminofructose 6-phosphate|Methyl 2,3-dihydro-3,5-dihydroxy-2-oxo-3-indoleacetic acid|Avenic acid B|N-Benzoylaspartic acid|N-Lactoyl ethanolamine phosphate|Glucosamine 6-phosphate|N-Acetylmannosamine|Glucosamine-1P|N-Acetyl-b-D-galactosamine|beta-N-Acetylglucosamine|N-Acetyl-D-glucosamine|N-Acetylgalactosamine	55.1|56.9|27.1|30.1|27.1|33.4|56.9|55.7|56.8|55.7|55.7|55.7|55.7	13	M+K-2H | M-H | M-H | M+K-2H | M-H | M+K-2H | M+K-2H | M+K-2H | M+K-2H	C8H15NO6 | C6H14NO8P | C6H14NO8P | C8H15NO6 | C6H14NO8P | C8H15NO6 | C8H15NO6 | C8H15NO6 | C8H15NO6	49.8 | 50.4 | 50.4 | 49.9 | 50.4 | 49.9 | 49.9 | 49.9 | 49.9	0.791423500690555 | 1.12254601669635 | 1.12254601669635 | 0.791423500690555 | 1.12254601669635 | 0.791423500690555 | 0.791423500819108 | 0.791423500690555 | 0.791423500819108	94.9366966508527 | 96.5458701176858 | 96.5458701176858 | 94.9366966508527 | 96.5458701176858 | 94.9366966508527 | 94.9366966508527 | 94.9366966508527 | 94.9366966508527		258.039	1	10.0665	0.369067	15922.7	16782	16723.6	17073.7	17162.7	15716.7	31514.5	27110.6	26315.5	29316.6	35398.5	13386.3	12662.3	11700.4	14677.8	12155	9610.39	12224.8	8469.93	8962	10277.8	8954.74	21571.9	27009.8	25231.7	15356.1		-3.02061	9.6e-07	3.07e-06
7.06_231.0987m/z	L3	HMDB0029393 | HMDB0029123 | HMDB0029062 | HMDB0029010 | HMDB0028873 | HMDB0028766 | HMDB0028695 | HMDB0012161 | HMDB0001199	L-N-(3-Carboxypropyl)glutamine | Valyl-Aspartate | Threoninyl-Hydroxyproline | Prolyl-Alanine | Hydroxyprolyl-Threonine | Aspartyl-Valine | Alanyl-Proline | 4-(Glutamylamino) butanoate | N2-Succinyl-L-ornithine	9	Endogenous|Food	HMDB0029393|HMDB0029123|HMDB0029062|HMDB0029010|HMDB0028873|HMDB0028766|HMDB0028695|HMDB0012161|HMDB0001199	L-N-(3-Carboxypropyl)glutamine|Valyl-Aspartate|Threoninyl-Hydroxyproline|Prolyl-Alanine|Hydroxyprolyl-Threonine|Aspartyl-Valine|Alanyl-Proline|4-(Glutamylamino) butanoate|N2-Succinyl-L-ornithine	32.5|37.8|31.2|31.2|31.4|35|33.2|32.5|34.2	9	M-H | M-H | M-H | M+FA-H | M-H | M-H | M+FA-H | M-H | M-H	C9H16N2O5 | C9H16N2O5 | C9H16N2O5 | C8H14N2O3 | C9H16N2O5 | C9H16N2O5 | C8H14N2O3 | C9H16N2O5 | C9H16N2O5	44.3 | 45.3 | 44 | 44.3 | 44.1 | 44.8 | 44.7 | 44.3 | 44.6	0.0479273800018838 | 0.0479273800018838 | 0.0479273800018838 | 0.0597821722446532 | 0.0479273800018838 | 0.0479273800018838 | 0.0597821723973756 | 0.0479273800018838 | 0.0479273800018838	88.9493660645701 | 88.9493660645701 | 88.9493660645701 | 90.4228198398944 | 88.9493660645701 | 88.9493660645701 | 90.4228198398944 | 88.9493660645701 | 88.9493660645701		231.099	1	7.05518	0.3071	17529.9	20464.6	19493.6	18523.9	17863.1	11754.3	4333.54	5306.77	4457.77	4846.1	4853.23	8770	11392.8	13740.9	8768.28	13279.1	17306.5	15963.7	14539.4	20260.6	15401.4	40931.3	33381.7	56233.7	47980.2	36464.4		3.50759	7.62e-08	4.47e-07
4.61_144.0660m/z	L3	HMDB0094698 | HMDB0061156 | HMDB0059595 | HMDB0035359 | HMDB0032862 | HMDB0029426 | HMDB0029425 | HMDB0003681 | HMDB0001263	N-Propionylalanine | N-(2-Carboxymethyl)-morpholine | (S)-2-amino-6-oxohexanoate | 1-Deoxynojirimycin | 2-Amino-4-ethoxy-3-hydroxybutanoic acid | L-trans-5-Hydroxy-2-piperidinecarboxylic acid | L-cis-4-(Hydroxymethyl)-2-pyrrolidinecarboxylic acid | 4-Acetamidobutanoic acid | Allysine	9	Endogenous|Food	HMDB0094698|HMDB0061156|HMDB0059595|HMDB0035359|HMDB0032862|HMDB0029426|HMDB0029425|HMDB0015127|HMDB0012151|HMDB0012131|HMDB0011727|HMDB0003681|HMDB0001263|HMDB0000808|HMDB0000730	N-Propionylalanine|N-(2-Carboxymethyl)-morpholine|(S)-2-amino-6-oxohexanoate|1-Deoxynojirimycin|2-Amino-4-ethoxy-3-hydroxybutanoic acid|L-trans-5-Hydroxy-2-piperidinecarboxylic acid|L-cis-4-(Hydroxymethyl)-2-pyrrolidinecarboxylic acid|Methyl aminolevulinate|2-Keto-6-aminocaproate|(S)-5-Amino-3-oxohexanoate|Bicine|4-Acetamidobutanoic acid|Allysine|N-Butyrylglycine|Isobutyrylglycine	10.6|21.7|24.5|17.7|16.5|22.9|22.3|1.24|9.53|9.95|9.66|25.3|24.5|9.95|9.95	15	M-H | M-H | M-H | M-H2O-H | M-H2O-H | M-H | M-H | M-H | M-H	C6H11NO3 | C6H11NO3 | C6H11NO3 | C6H13NO4 | C6H13NO4 | C6H11NO3 | C6H11NO3 | C6H11NO3 | C6H11NO3	40.1 | 42.4 | 42.9 | 41.6 | 41.4 | 42.6 | 42.5 | 43.1 | 42.9	-4.15066020170851 | -4.15066020170851 | -4.15066020170851 | -3.6922472113912 | -3.6922472113912 | -4.15066020170851 | -4.1506602015126 | -4.15066020170851 | -4.15066020170851	94.9539452457358 | 94.9539452457358 | 94.9539452457358 | 94.7161721800738 | 94.7161721800738 | 94.9539452457358 | 94.9539452457358 | 94.9539452457358 | 94.9539452457358		144.066	1	4.60847	0.17515	1434.92	1598.21	1478.21	1233.86	1237.92	955.928	937.49	1092.49	808.934	912.972	1316.97	1231.77	1266.61	1270.22	1292.03	1120.52	851.535	773.512	750.45	1230.91	955.427	1802.67	1692.19	1887.18	1809.86	1575.03		-1.11115	0.405968	0.164801
1.76_728.5260m/z	L3	HMDB0113141 | HMDB0113114 | HMDB0113042 | HMDB0112957 | HMDB0112956 | HMDB0008098 | HMDB0008065 | HMDB0007906 | HMDB0007905	PE-NMe(18:1(9Z)/16:1(9Z)) | PE-NMe(18:1(11Z)/16:1(9Z)) | PE-NMe(16:0/18:2(9Z,12Z)) | PE-NMe(16:1(9Z)/18:1(11Z)) | PE-NMe(16:1(9Z)/18:1(9Z)) | PC(18:1(9Z)/14:1(9Z)) | PC(18:1(11Z)/14:1(9Z)) | PC(14:1(9Z)/18:1(9Z)) | PC(14:1(9Z)/18:1(11Z))	9	Endogenous|Food	HMDB0114067|HMDB0113920|HMDB0113337|HMDB0113309|HMDB0113167|HMDB0113141|HMDB0113114|HMDB0113042|HMDB0112984|HMDB0112957|HMDB0112956|HMDB0112955|HMDB0009285|HMDB0008901|HMDB0008130|HMDB0008098|HMDB0008065|HMDB0008002|HMDB0007906|HMDB0007905|HMDB0007874	PE-NMe2(18:2(9Z,12Z)/15:0)|PE-NMe2(15:0/18:2(9Z,12Z))|PE-NMe(20:2(11Z,14Z)/14:0)|PE-NMe(20:1(11Z)/14:1(9Z))|PE-NMe(18:2(9Z,12Z)/16:0)|PE-NMe(18:1(9Z)/16:1(9Z))|PE-NMe(18:1(11Z)/16:1(9Z))|PE-NMe(16:0/18:2(9Z,12Z))|PE-NMe(14:0/20:2(11Z,14Z))|PE-NMe(16:1(9Z)/18:1(11Z))|PE-NMe(16:1(9Z)/18:1(9Z))|PE-NMe(14:1(9Z)/20:1(11Z))|PE(20:2(11Z,14Z)/15:0)|PE(15:0/20:2(11Z,14Z))|PC(18:2(9Z,12Z)/14:0)|PC(18:1(9Z)…	3.66|5.8|0|0|5.8|22|22|14|0|28|28|0|0.225|2.36|3.66|19.9|19.9|10.5|17.5|17.5|3.66	21	M-H	C40H76NO8P	41.3 | 41.3 | 39.7 | 42.5 | 42.5 | 40.9 | 40.9 | 40.4 | 40.4	3.31318059100943 | 3.31318059100943 | 3.31318059116527 | 3.31318059100943 | 3.31318059100943 | 3.31318059116527 | 3.31318059116527 | 3.31318059100943 | 3.31318059100943	88.3302		728.526	1	1.75642	0.293383	22236.5	20529.6	21192.5	21593.7	21053.4	20972.3	48280	50101.1	48777.9	47808	45114.4	24253.2	22305.8	19922.7	19995.2	18240.1	17418.5	9984.37	15008.5	9341.69	14209.1	12628.6	4986.9	4651.63	5099.89	12572.4		-3.63968	4.73e-06	1.09e-05
8.92_469.2787m/z	L3	HMDB0013158 | HMDB0000437 | HMDB0000433 | HMDB0000399 | HMDB0000377 | HMDB0000367 | HMDB0000340 | HMDB0000316 | HMDB0000311 | HMDB0000307	1b,3a,7b-Trihydroxy-5b-cholanoic acid | 3a,4b,7a,12a-Tetrahydroxy-5b-cholanoic acid | 1,3,7,12-Tetrahydroxycholan-24-oic acid | 3a,6b,7a,12a-Tetrahydroxy-5b-cholanoic acid | 3a,6b,7b,12b-Tetrahydroxy-5b-cholanoic acid | 3a,6b,7b,12a-Tetrahydroxy-5b-cholanoic acid | 3a,7a,12a,19-Tetrahydroxy-5b-cholanoic acid | 2b,3a,7a,12a-Tetrahydroxy-5b-cholanoic acid | 3b,4b,7a,12a-Tetrahydroxy-5b-cholanoic ac…	10	Endogenous|Food	HMDB0013192|HMDB0013158|HMDB0000437|HMDB0000433|HMDB0000399|HMDB0000377|HMDB0000367|HMDB0000340|HMDB0000316|HMDB0000311|HMDB0000307	3a,7b,21-Trihydroxy-5b-cholanoic acid|1b,3a,7b-Trihydroxy-5b-cholanoic acid|3a,4b,7a,12a-Tetrahydroxy-5b-cholanoic acid|1,3,7,12-Tetrahydroxycholan-24-oic acid|3a,6b,7a,12a-Tetrahydroxy-5b-cholanoic acid|3a,6b,7b,12b-Tetrahydroxy-5b-cholanoic acid|3a,6b,7b,12a-Tetrahydroxy-5b-cholanoic acid|3a,7a,12a,19-Tetrahydroxy-5b-cholanoic acid|2b,3a,7a,12a-Tetrahydroxy-5b-cholanoic acid|3b,4b,7a,12a-Tetrah…	28.3|43.6|43.6|43.6|43.6|43.6|43.6|43.6|43.6|43.6|43.6	11	M+FA-H	C24H40O6	45.9	-4.63023757267994 | -4.63023757254596 | -4.63023757267994 | -4.63023757254596 | -4.63023757254596 | -4.63023757254596 | -4.63023757254596 | -4.63023757254596 | -4.63023757254596 | -4.63023757254596	91.3574		469.279	1	8.91712	0.421083	23236.5	24076.4	23748.4	23674.1	24178.9	22672	6167.32	8079.69	8501.46	7757.71	5152.94	15048	21560.6	23176.2	14983	24991.9	26231.3	24364.7	21749.5	25206.9	22589.6	36519	35731.8	46182.3	40710.2	37029.4		3.36918	1.87e-06	5.18e-06
7.21_287.1510n	L3	HMDB0060929 | HMDB0060854 | HMDB0060798 | HMDB0060796 | HMDB0060548 | HMDB0041956 | HMDB0040699 | HMDB0015005 | HMDB0014887 | HMDB0014812	Dihydroisomorphine | Nordihydroisomorphine | 6beta-Hydroxy-hydromorphone | 6alpha-Hydroxy-hydromorphone | Dihydromorphine | Nordihydrocodeine | Feruperine | Ritodrine | Etodolac | Galantamine	10	Endogenous|Food	HMDB0060929|HMDB0060854|HMDB0060798|HMDB0060796|HMDB0060548|HMDB0041956|HMDB0040699|HMDB0033874|HMDB0015005|HMDB0014887|HMDB0014812	Dihydroisomorphine|Nordihydroisomorphine|6beta-Hydroxy-hydromorphone|6alpha-Hydroxy-hydromorphone|Dihydromorphine|Nordihydrocodeine|Feruperine|Piperanine|Ritodrine|Etodolac|Galantamine	38.8|38.8|38.8|38.8|38.8|38.8|45.5|0.638|44.6|49.7|38.8	11	M+Na-2H, M+FA-H	C17H21NO3	45.3 | 45.3 | 45.3 | 45.3 | 45.3 | 45.3 | 46.7 | 46.5 | 47.5 | 45.3	-3.99975209513668 | -3.99975209493873 | -3.99975209493873 | -3.99975209493873 | -3.99975209513668 | -3.99975209493873 | -3.99975209493873 | -3.99975209493873 | -3.99975209493873 | -3.99975209493873	92.4036	287.151	308.126	1	7.20845	0.201817	7090.13	7683.08	7853.24	8026.11	8119.23	6692.82	1425.64	1628.39	1755.01	1792.4	1291.55	2965.1	4107.85	5534.15	3301.22	5845.35	9468.11	8067.88	7874.22	9435.32	8136.58	14934.4	13123.4	17311.3	16051.5	14215.7		5.44561	1.47e-08	1.53e-07
6.88_242.0784m/z	L3	HMDB0060478 | HMDB0032055 | HMDB0029144 | HMDB0028814 | HMDB0028793 | HMDB0028767 | HMDB0028751 | HMDB0028730 | HMDB0015122 | HMDB0000089	gamma-Glutamyl-beta-cyanoalanine | N-Acetylhistidine | gamma-Glutamylasparagine | Glutamylasparagine | Glutaminylaspartic acid | Aspartyl-Gamma-glutamate | Aspartyl-Glutamine | Asparaginyl-Glutamic acid | Cytarabine | Cytidine	10	Endogenous|Food	HMDB0060478|HMDB0032055|HMDB0029144|HMDB0028814|HMDB0028793|HMDB0028767|HMDB0028751|HMDB0028730|HMDB0015122|HMDB0000089	gamma-Glutamyl-beta-cyanoalanine|N-Acetylhistidine|gamma-Glutamylasparagine|Glutamylasparagine|Glutaminylaspartic acid|Aspartyl-Gamma-glutamate|Aspartyl-Glutamine|Asparaginyl-Glutamic acid|Cytarabine|Cytidine	29.4|26.5|34.5|34.2|34|34.6|34.7|25.4|23.2|23.2	10	M-H | M+FA-H | M-H2O-H | M-H2O-H | M-H2O-H | M-H2O-H | M-H2O-H | M-H2O-H | M-H | M-H	C9H13N3O5 | C8H11N3O3 | C9H15N3O6 | C9H15N3O6 | C9H15N3O6 | C9H15N3O6 | C9H15N3O6 | C9H15N3O6 | C9H13N3O5 | C9H13N3O5	44.8 | 44.5 | 45.8 | 45.7 | 45.7 | 45.8 | 45.8 | 44 | 43.6 | 43.6	0.839766991341563 | 1.03580481814269 | 0.781855829363157 | 0.781855829363157 | 0.781855829145446 | 0.781855829363157 | 0.781855829363157 | 0.781855829363157 | 0.839766991575405 | 0.839766991575405	95.5516074923426 | 97.1370520879586 | 95.3005584947575 | 95.3005584947575 | 95.3005584947575 | 95.3005584947575 | 95.3005584947575 | 95.3005584947575 | 95.5516074923426 | 95.5516074923426		242.078	1	6.87945	0.206483	3337.32	3577.5	3608.03	3560.09	3635.23	3139.08	1859.78	2005.26	2116.21	2207.42	2013.06	4014.29	4740.02	4718.03	4396.13	4991.49	2707.56	2470.34	2421.73	2775.93	2382.46	4784.92	4271.97	5247.7	4772.78	4527.43		1.25057	0.000738356	0.000797456
1.76_742.5418m/z	L3	HMDB0114042 | HMDB0114015 | HMDB0113858 | HMDB0113857 | HMDB0009090 | HMDB0009059 | HMDB0009058 | HMDB0009026 | HMDB0009025 | HMDB0008994	PE-NMe2(18:1(9Z)/16:1(9Z)) | PE-NMe2(18:1(11Z)/16:1(9Z)) | PE-NMe2(16:1(9Z)/18:1(11Z)) | PE-NMe2(16:1(9Z)/18:1(9Z)) | PE(18:2(9Z,12Z)/18:0) | PE(18:1(9Z)/18:1(9Z)) | PE(18:1(9Z)/18:1(11Z)) | PE(18:1(11Z)/18:1(9Z)) | PE(18:1(11Z)/18:1(11Z)) | PE(18:0/18:2(9Z,12Z))	10	Endogenous|Food	HMDB0114239|HMDB0114211|HMDB0114068|HMDB0114042|HMDB0114015|HMDB0113943|HMDB0113884|HMDB0113858|HMDB0113857|HMDB0113856|HMDB0113339|HMDB0113025|HMDB0010168|HMDB0009547|HMDB0009515|HMDB0009286|HMDB0009254|HMDB0009090|HMDB0009059|HMDB0009058|HMDB0009026|HMDB0009025|HMDB0008994|HMDB0008966|HMDB0008934|HMDB0008875|HMDB0008843|HMDB0008132|HMDB0007940	PE-NMe2(20:2(11Z,14Z)/14:0)|PE-NMe2(20:1(11Z)/14:1(9Z))|PE-NMe2(18:2(9Z,12Z)/16:0)|PE-NMe2(18:1(9Z)/16:1(9Z))|PE-NMe2(18:1(11Z)/16:1(9Z))|PE-NMe2(16:0/18:2(9Z,12Z))|PE-NMe2(14:0/20:2(11Z,14Z))|PE-NMe2(16:1(9Z)/18:1(11Z))|PE-NMe2(16:1(9Z)/18:1(9Z))|PE-NMe2(14:1(9Z)/20:1(11Z))|PE-NMe(20:2(11Z,14Z)/15:0)|PE-NMe(15:0/20:2(11Z,14Z))|SM(d18:0/16:0)|PE(22:2(13Z,16Z)/14:0)|PE(22:1(13Z)/14:1(9Z))|PE(20:2(…	0.149|0.119|26|74.1|74.1|26|0.149|74.1|74.1|0.119|0.149|0.149|0|0.667|0.637|0.784|0.637|73.6|74.6|74.6|74.6|74.6|73.6|0.637|0.784|0.637|0.667|25.9|25.9	29	M-H	C41H78NO8P	52.7 | 52.7 | 52.7 | 52.7 | 52.6 | 52.8 | 52.8 | 52.8 | 52.8 | 52.6	3.50749334653957 | 3.50749334653957 | 3.50749334653957 | 3.50749334653957 | 3.50749334638667 | 3.50749334653957 | 3.50749334653957 | 3.50749334653957 | 3.50749334653957 | 3.50749334669247	93.4999		742.542	1	1.76078	0.582417	612616	589406	592913	600215	591068	604993	962322	984251	945126	1.02417e+06	894838	740344	703950	715869	619126	636326	684559	388052	562221	446398	705002	505848	308110	293415	313954	546340		-1.7266	0.0013607	0.00135163
3.93_185.0564m/z	L3	HMDB0061890 | HMDB0028840 | HMDB0028819 | HMDB0028746 | HMDB0028683 | HMDB0011667 | HMDB0011162 | HMDB0004988 | HMDB0002820 | HMDB0002271 | HMDB0002144	Pyroglutamylglycine | Glycyl-Glutamate | Glutamylglycine | Aspartyl-Alanine | Alanyl-Aspartic acid | gamma-Glutamylglycine | L-beta-aspartyl-L-alanine | Pi-Methylimidazoleacetic acid | Methylimidazoleacetic acid | Imidazolepropionic acid | 1,3-Dimethyluracil	11	Endogenous	HMDB0061890|HMDB0028840|HMDB0028819|HMDB0028746|HMDB0028683|HMDB0011667|HMDB0011162|HMDB0004988|HMDB0002820|HMDB0002271|HMDB0002144	Pyroglutamylglycine|Glycyl-Glutamate|Glutamylglycine|Aspartyl-Alanine|Alanyl-Aspartic acid|gamma-Glutamylglycine|L-beta-aspartyl-L-alanine|Pi-Methylimidazoleacetic acid|Methylimidazoleacetic acid|Imidazolepropionic acid|1,3-Dimethyluracil	27.3|24.6|24.6|25|25|25.9|25.9|24.7|23.9|24.7|23.6	11	M-H | M-H2O-H | M-H2O-H | M-H2O-H | M-H2O-H | M-H2O-H | M-H2O-H | M+FA-H | M+FA-H | M+FA-H | M+FA-H	C7H10N2O4 | C7H12N2O5 | C7H12N2O5 | C7H12N2O5 | C7H12N2O5 | C7H12N2O5 | C7H12N2O5 | C6H8N2O2 | C6H8N2O2 | C6H8N2O2 | C6H8N2O2	44.3 | 43.7 | 43.7 | 43.8 | 43.8 | 44 | 44 | 43.9 | 43.8 | 43.9 | 43.7	-1.7809202593885 | -1.62372442925862 | -1.62372442925862 | -1.62372442925862 | -1.62372442925862 | -1.62372442925862 | -1.62372442925862 | -2.36589571447136 | -2.36589571447136 | -2.36589571467429 | -2.36589571447136	96.303769623585 | 96.0657502261064 | 96.0657502261064 | 96.0657502261064 | 96.0657502261064 | 96.0657502261064 | 96.0657502261064 | 97.8014244486335 | 97.8014244486335 | 97.8014244486335 | 97.8014244486335		185.056	1	3.93367	0.14905	1780.56	1914.67	1900.83	2005.47	2035.64	1768.81	1428.2	1299.69	1566.08	1612.4	1312.64	2181.42	2561.68	2440.85	2421.24	2797.11	1618.18	1546.11	1361.49	1459.99	1440.71	2559.82	2201.82	2453.09	2427.34	2266.97		1.02874	0.582999	0.21975
3.61_185.0564m/z	L3	HMDB0061890 | HMDB0028840 | HMDB0028819 | HMDB0028746 | HMDB0028683 | HMDB0011667 | HMDB0011162 | HMDB0004988 | HMDB0002820 | HMDB0002271 | HMDB0002144	Pyroglutamylglycine | Glycyl-Glutamate | Glutamylglycine | Aspartyl-Alanine | Alanyl-Aspartic acid | gamma-Glutamylglycine | L-beta-aspartyl-L-alanine | Pi-Methylimidazoleacetic acid | Methylimidazoleacetic acid | Imidazolepropionic acid | 1,3-Dimethyluracil	11	Endogenous	HMDB0061890|HMDB0028840|HMDB0028819|HMDB0028746|HMDB0028683|HMDB0011667|HMDB0011162|HMDB0004988|HMDB0002820|HMDB0002271|HMDB0002144	Pyroglutamylglycine|Glycyl-Glutamate|Glutamylglycine|Aspartyl-Alanine|Alanyl-Aspartic acid|gamma-Glutamylglycine|L-beta-aspartyl-L-alanine|Pi-Methylimidazoleacetic acid|Methylimidazoleacetic acid|Imidazolepropionic acid|1,3-Dimethyluracil	24.8|28.2|28.2|29|24.2|25|21.2|28|24|26.4|28.2	11	M-H | M-H2O-H | M-H2O-H | M-H2O-H | M-H2O-H | M-H2O-H | M-H2O-H | M+FA-H | M+FA-H | M+FA-H | M+FA-H	C7H10N2O4 | C7H12N2O5 | C7H12N2O5 | C7H12N2O5 | C7H12N2O5 | C7H12N2O5 | C7H12N2O5 | C6H8N2O2 | C6H8N2O2 | C6H8N2O2 | C6H8N2O2	43.5 | 44.2 | 44.2 | 44.3 | 43.4 | 43.5 | 42.8 | 44.3 | 43.5 | 44 | 44.3	-1.81286971408162 | -1.65285419139159 | -1.65285419139159 | -1.65285419139159 | -1.65285419139159 | -1.65285419139159 | -1.65285419139159 | -2.40833970654174 | -2.40833970654174 | -2.40833970674466 | -2.40833970654174	94.8869633407977 | 94.6524456481754 | 94.6524456481754 | 94.6524456481754 | 94.6524456481754 | 94.6524456481754 | 94.6524456481754 | 96.3625848978457 | 96.3625848978457 | 96.3625848978457 | 96.3625848978457		185.056	1	3.60925	0.179667	1431.19	1463.88	1435.63	1399.45	1474.77	1291.18	955.701	936.657	1023.42	1003.76	926.325	1684.15	1964.41	1861.29	1826.87	2052.07	1124.38	1102.25	991.839	1068.61	1043.23	1896.46	1575.93	1949.91	1851.99	1717.21		1.09997	0.0118782	0.00856499
4.04_185.0564m/z	L3	HMDB0061890 | HMDB0028840 | HMDB0028819 | HMDB0028746 | HMDB0028683 | HMDB0011667 | HMDB0011162 | HMDB0004988 | HMDB0002820 | HMDB0002271 | HMDB0002144	Pyroglutamylglycine | Glycyl-Glutamate | Glutamylglycine | Aspartyl-Alanine | Alanyl-Aspartic acid | gamma-Glutamylglycine | L-beta-aspartyl-L-alanine | Pi-Methylimidazoleacetic acid | Methylimidazoleacetic acid | Imidazolepropionic acid | 1,3-Dimethyluracil	11	Endogenous	HMDB0061890|HMDB0028840|HMDB0028819|HMDB0028746|HMDB0028683|HMDB0011667|HMDB0011162|HMDB0004988|HMDB0002820|HMDB0002271|HMDB0002144	Pyroglutamylglycine|Glycyl-Glutamate|Glutamylglycine|Aspartyl-Alanine|Alanyl-Aspartic acid|gamma-Glutamylglycine|L-beta-aspartyl-L-alanine|Pi-Methylimidazoleacetic acid|Methylimidazoleacetic acid|Imidazolepropionic acid|1,3-Dimethyluracil	40.3|44.5|45.6|45.2|38.5|40.8|36.3|44.7|38.1|43.4|39	11	M-H | M-H2O-H | M-H2O-H | M-H2O-H | M-H2O-H | M-H2O-H | M-H2O-H | M+FA-H | M+FA-H | M+FA-H | M+FA-H	C7H10N2O4 | C7H12N2O5 | C7H12N2O5 | C7H12N2O5 | C7H12N2O5 | C7H12N2O5 | C7H12N2O5 | C6H8N2O2 | C6H8N2O2 | C6H8N2O2 | C6H8N2O2	46.8 | 47.7 | 47.9 | 47.8 | 46.5 | 46.9 | 46 | 47.9 | 46.5 | 47.6 | 46.7	-1.82566146642206 | -1.66451701020144 | -1.66451701020144 | -1.66451701020144 | -1.66451701020144 | -1.66451701020144 | -1.66451701020144 | -2.42533320580859 | -2.42533320580859 | -2.42533320601152 | -2.42533320580859	96.016982403264 | 95.7796718141908 | 95.7796718141908 | 95.7796718141908 | 95.7796718141908 | 95.7796718141908 | 95.7796718141908 | 97.5101772963082 | 97.5101772963082 | 97.5101772963082 | 97.5101772963082		185.056	1	4.04345	0.1493	2007.96	1971.75	2064.66	1950.16	1991.79	1781.25	1190.47	1303.83	1255.44	1209.46	1196.97	2337.64	2776.86	2808.49	2457.64	2880.72	1417.62	1267.17	1374.62	1543.27	1365.44	2507.34	2127.76	2580.61	2434.54	2403.06		1.13189	0.00963223	0.00720462
5.48_257.0782m/z	L3	HMDB0062585 | HMDB0060262 | HMDB0028818 | HMDB0011737 | HMDB0004813 | HMDB0002331 | HMDB0002234 | HMDB0001843 | HMDB0001369 | HMDB0000884 | HMDB0000805 | HMDB0000267	(3R,5S)-1-pyrroline-3-hydroxy-5-carboxylic Acid | 5-Oxoprolinate | Glutamylglutamic acid | gamma-Glutamylglutamic acid | 3-Methyluridine | Imidazoleacetic acid riboside | 1-Pyrroline-4-hydroxy-2-carboxylate | N-Acryloylglycine | Pyrroline hydroxycarboxylic acid | Ribothymidine | Pyrrolidonecarboxylic acid | Pyroglutamic acid	12	Endogenous|Food	HMDB0000267|HMDB0062585|HMDB0061093|HMDB0060262|HMDB0042036|HMDB0028818|HMDB0011737|HMDB0004813|HMDB0002331|HMDB0002234|HMDB0001843|HMDB0001369|HMDB0000884|HMDB0000805|HMDB0000267	[IHL:PYROGLUTAMIC ACID]|(3R,5S)-1-pyrroline-3-hydroxy-5-carboxylic Acid|dimethadione|5-Oxoprolinate|Thymidine glycol|Glutamylglutamic acid|gamma-Glutamylglutamic acid|3-Methyluridine|Imidazoleacetic acid riboside|1-Pyrroline-4-hydroxy-2-carboxylate|N-Acryloylglycine|Pyrroline hydroxycarboxylic acid|Ribothymidine|Pyrrolidonecarboxylic acid|Pyroglutamic acid	28.4|65.6|53.1|59.6|49.9|71.2|71.2|60.8|67.5|65.5|59.2|65.6|60.8|59.6|59.6	15	2M-H | 2M-H | M-H2O-H | M-H2O-H | M-H | M-H | 2M-H | 2M-H | 2M-H | M-H | 2M-H | 2M-H	C5H7NO3 | C5H7NO3 | C10H16N2O7 | C10H16N2O7 | C10H14N2O6 | C10H14N2O6 | C5H7NO3 | C5H7NO3 | C5H7NO3 | C10H14N2O6 | C5H7NO3 | C5H7NO3	52.1 | 50.9 | 53.4 | 53.4 | 51.4 | 52.7 | 52.1 | 50.8 | 52.1 | 51.4 | 50.9 | 50.9	0.954057193261099 | 0.954057193040848 | 0.891836718080196 | 0.891836718080196 | 0.954057193261099 | 0.954057193261099 | 0.954057193261099 | 0.95405719348135 | 0.954057193261099 | 0.954057193261099 | 0.954057193040848 | 0.954057193261099	96.1576652306769 | 96.1576652306769 | 97.0193582838691 | 97.0193582838691 | 97.2743767828925 | 97.2743767828925 | 96.1576652306769 | 96.1576652306769 | 96.1576652306769 | 97.2743767828925 | 96.1576652306769 | 96.1576652306769		257.078	1	5.47607	0.184317	31290.8	32659.6	32791.3	33318.7	33985.4	29127.3	19228.2	19669.7	20053.6	21429.8	18649.1	34235.7	41586.7	42273.6	35767.8	43964.6	24749.9	21827	20799.4	24058.5	22631	38492.6	43983.6	58038.9	51555.8	47155.4		1.15183	0.00726281	0.00564292
4.89_174.0403m/z	L3	HMDB0062585 | HMDB0061093 | HMDB0060273 | HMDB0060262 | HMDB0039163 | HMDB0003470 | HMDB0002234 | HMDB0001843 | HMDB0001369 | HMDB0000812 | HMDB0000805 | HMDB0000267	(3R,5S)-1-pyrroline-3-hydroxy-5-carboxylic Acid | dimethadione | 2-Amino-3-oxoadipate | 5-Oxoprolinate | D-N-(Carboxyacetyl)alanine | N-Formyl-L-glutamic acid | 1-Pyrroline-4-hydroxy-2-carboxylate | N-Acryloylglycine | Pyrroline hydroxycarboxylic acid | N-Acetyl-L-aspartic acid | Pyrrolidonecarboxylic acid | Pyroglutamic acid	12	Endogenous|Food	HMDB0000267|HMDB0000812|HMDB0062585|HMDB0061093|HMDB0060273|HMDB0060262|HMDB0039163|HMDB0004816|HMDB0003470|HMDB0002234|HMDB0001843|HMDB0001369|HMDB0000812|HMDB0000805|HMDB0000267	[IHL:PYROGLUTAMIC ACID]|[IHL:N-ACETYLASPARTIC ACID]|(3R,5S)-1-pyrroline-3-hydroxy-5-carboxylic Acid|dimethadione|2-Amino-3-oxoadipate|5-Oxoprolinate|D-N-(Carboxyacetyl)alanine|FAPy-adenine|N-Formyl-L-glutamic acid|1-Pyrroline-4-hydroxy-2-carboxylate|N-Acryloylglycine|Pyrroline hydroxycarboxylic acid|N-Acetyl-L-aspartic acid|Pyrrolidonecarboxylic acid|Pyroglutamic acid	0|0|32.9|30.7|34.7|40.7|41.8|0.895|32.9|36.7|31.8|32.9|41.6|40.7|40.7	15	M+FA-H | M+FA-H | M-H | M+FA-H | M-H | M-H | M+FA-H | M+FA-H | M+FA-H | M-H | M+FA-H | M+FA-H	C5H7NO3 | C5H7NO3 | C6H9NO5 | C5H7NO3 | C6H9NO5 | C6H9NO5 | C5H7NO3 | C5H7NO3 | C5H7NO3 | C6H9NO5 | C5H7NO3 | C5H7NO3	44.5 | 44.1 | 44.8 | 46.1 | 46.2 | 44.4 | 45.3 | 44.3 | 44.5 | 46.2 | 46.1 | 46.1	-3.49578600399064 | -3.49578600399064 | -2.57704380684074 | -3.49578600421089 | -2.57704380684074 | -2.57704380667838 | -3.49578600399064 | -3.49578600377039 | -3.49578600399064 | -2.57704380684074 | -3.49578600421089 | -3.49578600399064	93.7480506717357 | 93.7480506717357 | 92.3094893597134 | 93.7480506717357 | 92.3094893597134 | 92.3094893597134 | 93.7480506717357 | 93.7480506717357 | 93.7480506717357 | 92.3094893597134 | 93.7480506717357 | 93.7480506717357		174.04	1	4.88872	0.289167	8609.49	10218.1	10547	12063.2	12588.5	9135.34	5221.47	4889.77	4672.93	5733.87	4456.19	5098.14	5666.53	5908.52	5105.32	7498.74	13454.7	14762.2	10654.2	16263.6	13970.4	22703.4	23569.4	26855	27270.3	23185.5		2.76705	1.9e-06	5.22e-06
2.43_173.0451m/z	L3	HMDB0130150 | HMDB0040732 | HMDB0040594 | HMDB0038072 | HMDB0033517 | HMDB0033285 | HMDB0031847 | HMDB0031306 | HMDB0031303 | HMDB0012149 | HMDB0003072 | HMDB0003070	3,4,5-trihydroxycyclohex-1-ene-1-carboxylic acid | 2,7-Oxepanedione | (Â±)-Furaneol | xi-5-Acetyltetrahydro-2(3H)-furanone | 5,6-Dihydro-4-methoxy-2H-pyran-2-one | L-erythro-5-(1-Hydroxyethyl)-2(5H)-furanone | 2-Ethyl-3,4-dihydroxyfuran | 3-Hydroxy-4,5-dimethyl-2(5H)-furanone | Osmundalactone | 2-Isopropyl-3-oxosuccinate | Quinic acid | Shikimic acid	12	Endogenous|Food	HMDB0130150|HMDB0062377|HMDB0062194|HMDB0061388|HMDB0040732|HMDB0040594|HMDB0038072|HMDB0033517|HMDB0033285|HMDB0031847|HMDB0031306|HMDB0031303|HMDB0012149|HMDB0003072|HMDB0003070	3,4,5-trihydroxycyclohex-1-ene-1-carboxylic acid|4(R),8-dimethyl-trans-2-nonenoyl-CoA|2,6-dimethyl-trans-2-heptenoyl-CoA|Dimethyl 2-oxoglutarate|2,7-Oxepanedione|(Â±)-Furaneol|xi-5-Acetyltetrahydro-2(3H)-furanone|5,6-Dihydro-4-methoxy-2H-pyran-2-one|L-erythro-5-(1-Hydroxyethyl)-2(5H)-furanone|2-Ethyl-3,4-dihydroxyfuran|3-Hydroxy-4,5-dimethyl-2(5H)-furanone|Osmundalactone|2-Isopropyl-3-oxosuccinat…	29.9|1.56|1.56|5.39|21.6|32|21.9|21.3|34.4|32.6|30.7|34.5|24.2|34.1|29.9	15	M-H | M+FA-H | M+FA-H | M+FA-H | M+FA-H | M+FA-H | M+FA-H | M+FA-H | M+FA-H | M-H | M-H2O-H | M-H	C7H10O5 | C6H8O3 | C6H8O3 | C6H8O3 | C6H8O3 | C6H8O3 | C6H8O3 | C6H8O3 | C6H8O3 | C7H10O5 | C7H12O6 | C7H10O5	44.5 | 42.9 | 45 | 42.9 | 42.8 | 45.4 | 45.1 | 44.7 | 45.4 | 43.3 | 45.3 | 44.5	-2.69114013358946 | -3.65801635099368 | -3.65801635077172 | -3.65801635099368 | -3.65801635099368 | -3.65801635121564 | -3.65801635077172 | -3.65801635099368 | -3.65801635099368 | -2.69114013375275 | -2.43875859484256 | -2.69114013358946	95.5372496305418 | 97.0231038356813 | 97.0231038356813 | 97.0231038356813 | 97.0231038356813 | 97.0231038356813 | 97.0231038356813 | 97.0231038356813 | 97.0231038356813 | 95.5372496305418 | 95.2109120495226 | 95.5372496305418		173.045	1	2.43077	0.201433	2414.75	2540.75	2443.25	2352.71	2428.64	2345.83	2740.43	2898.06	2709.23	2934.83	2986.16	2694.24	2547.45	2108.71	2722.83	2393.92	2580.65	2275.3	2832.77	2483.67	2686.87	2595.09	2178.23	1936.52	2159.86	2755.87		-1.10961	0.0348053	0.0214147
3.66_173.0451m/z	L3	HMDB0130150 | HMDB0040732 | HMDB0040594 | HMDB0038072 | HMDB0033517 | HMDB0033285 | HMDB0031847 | HMDB0031306 | HMDB0031303 | HMDB0012149 | HMDB0003072 | HMDB0003070	3,4,5-trihydroxycyclohex-1-ene-1-carboxylic acid | 2,7-Oxepanedione | (Â±)-Furaneol | xi-5-Acetyltetrahydro-2(3H)-furanone | 5,6-Dihydro-4-methoxy-2H-pyran-2-one | L-erythro-5-(1-Hydroxyethyl)-2(5H)-furanone | 2-Ethyl-3,4-dihydroxyfuran | 3-Hydroxy-4,5-dimethyl-2(5H)-furanone | Osmundalactone | 2-Isopropyl-3-oxosuccinate | Quinic acid | Shikimic acid	12	Endogenous|Food	HMDB0130150|HMDB0062377|HMDB0062194|HMDB0061388|HMDB0040732|HMDB0040594|HMDB0038072|HMDB0033517|HMDB0033285|HMDB0031847|HMDB0031306|HMDB0031303|HMDB0012149|HMDB0003072|HMDB0003070	3,4,5-trihydroxycyclohex-1-ene-1-carboxylic acid|4(R),8-dimethyl-trans-2-nonenoyl-CoA|2,6-dimethyl-trans-2-heptenoyl-CoA|Dimethyl 2-oxoglutarate|2,7-Oxepanedione|(Â±)-Furaneol|xi-5-Acetyltetrahydro-2(3H)-furanone|5,6-Dihydro-4-methoxy-2H-pyran-2-one|L-erythro-5-(1-Hydroxyethyl)-2(5H)-furanone|2-Ethyl-3,4-dihydroxyfuran|3-Hydroxy-4,5-dimethyl-2(5H)-furanone|Osmundalactone|2-Isopropyl-3-oxosuccinat…	24.7|0|0|3.73|15.1|24.5|15.4|14.8|27.1|24.9|23.6|27.1|24.2|26.8|24.7	15	M-H | M+FA-H | M+FA-H | M+FA-H | M+FA-H | M+FA-H | M+FA-H | M+FA-H | M+FA-H | M-H | M-H2O-H | M-H	C7H10O5 | C6H8O3 | C6H8O3 | C6H8O3 | C6H8O3 | C6H8O3 | C6H8O3 | C6H8O3 | C6H8O3 | C7H10O5 | C7H12O6 | C7H10O5	43.6 | 41.8 | 43.7 | 41.8 | 41.7 | 44.2 | 43.7 | 43.5 | 44.2 | 43.5 | 44 | 43.6	-2.58912265282041 | -3.51934552819305 | -3.51934552797109 | -3.51934552819305 | -3.51934552819305 | -3.51934552841501 | -3.51934552797109 | -3.51934552819305 | -3.51934552819305 | -2.5891226529837 | -2.34630770796948 | -2.58912265282041	96.3456300289845 | 97.8440566644486 | 97.8440566644486 | 97.8440566644486 | 97.8440566644486 | 97.8440566644486 | 97.8440566644486 | 97.8440566644486 | 97.8440566644486 | 96.3456300289845 | 96.0165311699843 | 96.3456300289845		173.045	1	3.66178	0.232283	2832.65	3079.54	3111.66	2958.95	3048.82	2640.06	3290.57	3456.74	2843.67	3329.47	3423.23	2924.34	2830.84	3053.07	2952.94	2767.61	3005.44	3353.79	3498.32	3182.45	3220.38	2915.26	2964.22	2758.06	3070.73	2968.31		-1.00512	0.929445	0.309593
2.40_227.1037m/z	L3	HMDB0094651 | HMDB0029126 | HMDB0029018 | HMDB0028925 | HMDB0028903 | HMDB0028871 | HMDB0028832 | HMDB0028757 | HMDB0028756 | HMDB0011172 | HMDB0011166 | HMDB0006695	Pyroglutamylvaline | Valyl-Glutamate | Prolyl-Hydroxyproline | Leucyl-Aspartate | Isoleucyl-Aspartate | Hydroxyprolyl-Proline | Glutamylvaline | Aspartyl-Leucine | Aspartyl-Isoleucine | gamma-Glutamylvaline | L-beta-aspartyl-L-leucine | Prolylhydroxyproline	12	Endogenous|Food	HMDB0094651|HMDB0040573|HMDB0029126|HMDB0029018|HMDB0028925|HMDB0028903|HMDB0028871|HMDB0028832|HMDB0028757|HMDB0028756|HMDB0011172|HMDB0011166|HMDB0006695	Pyroglutamylvaline|Tetraacetylethylenediamine|Valyl-Glutamate|Prolyl-Hydroxyproline|Leucyl-Aspartate|Isoleucyl-Aspartate|Hydroxyprolyl-Proline|Glutamylvaline|Aspartyl-Leucine|Aspartyl-Isoleucine|gamma-Glutamylvaline|L-beta-aspartyl-L-leucine|Prolylhydroxyproline	27.2|1.03|25.7|27.6|26.4|26.4|28.3|27.8|27.5|27.5|29.6|29.2|27.6	13	M-H | M-H2O-H | M-H | M-H2O-H | M-H2O-H | M-H | M-H2O-H | M-H2O-H | M-H2O-H | M-H2O-H | M-H2O-H | M-H	C10H16N2O4 | C10H18N2O5 | C10H16N2O4 | C10H18N2O5 | C10H18N2O5 | C10H16N2O4 | C10H18N2O5 | C10H18N2O5 | C10H18N2O5 | C10H18N2O5 | C10H18N2O5 | C10H16N2O4	44.5 | 44.2 | 44.6 | 44.3 | 44.3 | 44.7 | 44.6 | 44.5 | 44.5 | 44.9 | 44.8 | 44.6	-0.0563088425196089 | -0.052170830476391 | -0.0563088425196089 | -0.052170830476391 | -0.052170830476391 | -0.0563088425196089 | -0.052170830476391 | -0.052170830476391 | -0.052170830476391 | -0.052170830476391 | -0.052170830476391 | -0.0563088425196089	95.3894628837534 | 95.1385743128846 | 95.3894628837534 | 95.1385743128846 | 95.1385743128846 | 95.3894628837534 | 95.1385743128846 | 95.1385743128846 | 95.1385743128846 | 95.1385743128846 | 95.1385743128846 | 95.3894628837534		227.104	1	2.39575	0.192683	6542.41	6458.57	6164.37	6512.37	6274.93	5387.8	4021.36	4187.49	4843.51	4487.6	4326.84	7662.14	8723.89	9090.17	7801.25	9324.43	4375.51	4890.58	4530.74	5001.01	4252.3	7392.77	7582.25	8285.56	8084.69	7263.55		1.05412	0.270653	0.120244
2.24_227.1037m/z	L3	HMDB0094651 | HMDB0029126 | HMDB0029018 | HMDB0028925 | HMDB0028903 | HMDB0028871 | HMDB0028832 | HMDB0028757 | HMDB0028756 | HMDB0011172 | HMDB0011166 | HMDB0006695	Pyroglutamylvaline | Valyl-Glutamate | Prolyl-Hydroxyproline | Leucyl-Aspartate | Isoleucyl-Aspartate | Hydroxyprolyl-Proline | Glutamylvaline | Aspartyl-Leucine | Aspartyl-Isoleucine | gamma-Glutamylvaline | L-beta-aspartyl-L-leucine | Prolylhydroxyproline	12	Endogenous|Food	HMDB0094651|HMDB0040573|HMDB0029126|HMDB0029018|HMDB0028925|HMDB0028903|HMDB0028871|HMDB0028832|HMDB0028757|HMDB0028756|HMDB0011172|HMDB0011166|HMDB0006695	Pyroglutamylvaline|Tetraacetylethylenediamine|Valyl-Glutamate|Prolyl-Hydroxyproline|Leucyl-Aspartate|Isoleucyl-Aspartate|Hydroxyprolyl-Proline|Glutamylvaline|Aspartyl-Leucine|Aspartyl-Isoleucine|gamma-Glutamylvaline|L-beta-aspartyl-L-leucine|Prolylhydroxyproline	36.8|0.397|37.1|36.3|31.2|31.2|36.3|37.1|32|32|27.8|27.7|36.3	13	M-H | M-H2O-H | M-H | M-H2O-H | M-H2O-H | M-H | M-H2O-H | M-H2O-H | M-H2O-H | M-H2O-H | M-H2O-H | M-H	C10H16N2O4 | C10H18N2O5 | C10H16N2O4 | C10H18N2O5 | C10H18N2O5 | C10H16N2O4 | C10H18N2O5 | C10H18N2O5 | C10H18N2O5 | C10H18N2O5 | C10H18N2O5 | C10H16N2O4	46.2 | 46.2 | 46.1 | 45.1 | 45.1 | 46.1 | 46.2 | 45.2 | 45.2 | 44.4 | 44.3 | 46.1	-0.236312885083011 | -0.219002624749142 | -0.236312885083011 | -0.219002624749142 | -0.219002624749142 | -0.236312885083011 | -0.219002624749142 | -0.219002624749142 | -0.219002624749142 | -0.219002624749142 | -0.219002624749142 | -0.236312885083011	94.5331324507292 | 94.284496157125 | 94.5331324507292 | 94.284496157125 | 94.284496157125 | 94.5331324507292 | 94.284496157125 | 94.284496157125 | 94.284496157125 | 94.284496157125 | 94.284496157125 | 94.5331324507292		227.104	1	2.2381	0.2058	8476.63	9129.49	8732.24	8769.58	8871.68	8471.83	5727.04	5830.67	6365.04	6492.86	6041.33	10602.1	12283.9	12244.9	10945.8	13249	7306.86	6701.09	5781.33	5936.78	6073.94	10827	11128.9	12190.5	11309.8	10202		1.0441	0.440055	0.17565
3.17_227.1037m/z	L3	HMDB0094651 | HMDB0029126 | HMDB0029018 | HMDB0028925 | HMDB0028903 | HMDB0028871 | HMDB0028832 | HMDB0028757 | HMDB0028756 | HMDB0011172 | HMDB0011166 | HMDB0006695	Pyroglutamylvaline | Valyl-Glutamate | Prolyl-Hydroxyproline | Leucyl-Aspartate | Isoleucyl-Aspartate | Hydroxyprolyl-Proline | Glutamylvaline | Aspartyl-Leucine | Aspartyl-Isoleucine | gamma-Glutamylvaline | L-beta-aspartyl-L-leucine | Prolylhydroxyproline	12	Endogenous|Food	HMDB0094651|HMDB0040573|HMDB0029126|HMDB0029018|HMDB0028925|HMDB0028903|HMDB0028871|HMDB0028832|HMDB0028757|HMDB0028756|HMDB0011172|HMDB0011166|HMDB0006695	Pyroglutamylvaline|Tetraacetylethylenediamine|Valyl-Glutamate|Prolyl-Hydroxyproline|Leucyl-Aspartate|Isoleucyl-Aspartate|Hydroxyprolyl-Proline|Glutamylvaline|Aspartyl-Leucine|Aspartyl-Isoleucine|gamma-Glutamylvaline|L-beta-aspartyl-L-leucine|Prolylhydroxyproline	33.2|1.06|29.1|33.7|27.5|27.5|31.2|32.4|27.5|27.5|30.5|27.5|33.7	13	M-H | M-H2O-H | M-H | M-H2O-H | M-H2O-H | M-H | M-H2O-H | M-H2O-H | M-H2O-H | M-H2O-H | M-H2O-H | M-H	C10H16N2O4 | C10H18N2O5 | C10H16N2O4 | C10H18N2O5 | C10H18N2O5 | C10H16N2O4 | C10H18N2O5 | C10H18N2O5 | C10H18N2O5 | C10H18N2O5 | C10H18N2O5 | C10H16N2O4	46 | 45.1 | 46.1 | 44.8 | 44.8 | 45.6 | 45.8 | 44.8 | 44.8 | 45.4 | 44.8 | 46.1	0.0252608191237993 | 0.023429766134642 | 0.0252608191237993 | 0.023429766134642 | 0.023429766134642 | 0.0252608191237993 | 0.023429766134642 | 0.023429766134642 | 0.023429766134642 | 0.023429766134642 | 0.023429766134642 | 0.0252608191237993	96.7255812093908 | 96.4711784472571 | 96.7255812093908 | 96.4711784472571 | 96.4711784472571 | 96.7255812093908 | 96.4711784472571 | 96.4711784472571 | 96.4711784472571 | 96.4711784472571 | 96.4711784472571 | 96.7255812093908		227.104	1	3.17135	0.253967	15662.1	16138.9	16077.4	16190	16311.2	14815.3	10781.6	11013.4	11608.8	11624.9	11181.4	18879.2	21975.8	21920.8	19913.1	22566.3	12820.3	10727.6	11265	12291.3	11515.4	20946.9	17952.7	20671.5	19555.2	19459.4		1.04286	0.280448	0.123392
6.26_257.0782m/z	L3	HMDB0062585 | HMDB0061093 | HMDB0060262 | HMDB0028818 | HMDB0011737 | HMDB0004813 | HMDB0002331 | HMDB0002234 | HMDB0001843 | HMDB0001369 | HMDB0000884 | HMDB0000805 | HMDB0000267	(3R,5S)-1-pyrroline-3-hydroxy-5-carboxylic Acid | dimethadione | 5-Oxoprolinate | Glutamylglutamic acid | gamma-Glutamylglutamic acid | 3-Methyluridine | Imidazoleacetic acid riboside | 1-Pyrroline-4-hydroxy-2-carboxylate | N-Acryloylglycine | Pyrroline hydroxycarboxylic acid | Ribothymidine | Pyrrolidonecarboxylic acid | Pyroglutamic acid	13	Endogenous|Food	HMDB0062585|HMDB0061093|HMDB0060262|HMDB0042036|HMDB0028818|HMDB0011737|HMDB0004813|HMDB0002331|HMDB0002234|HMDB0001843|HMDB0001369|HMDB0000884|HMDB0000805|HMDB0000267	(3R,5S)-1-pyrroline-3-hydroxy-5-carboxylic Acid|dimethadione|5-Oxoprolinate|Thymidine glycol|Glutamylglutamic acid|gamma-Glutamylglutamic acid|3-Methyluridine|Imidazoleacetic acid riboside|1-Pyrroline-4-hydroxy-2-carboxylate|N-Acryloylglycine|Pyrroline hydroxycarboxylic acid|Ribothymidine|Pyrrolidonecarboxylic acid|Pyroglutamic acid	51|42.6|47.8|38.9|54.2|54.2|47.6|51.7|51|47.8|51|47.6|47.8|47.8	14	2M-H | 2M-H | 2M-H | M-H2O-H | M-H2O-H | M-H | M-H | 2M-H | 2M-H | 2M-H | M-H | 2M-H | 2M-H	C5H7NO3 | C5H7NO3 | C5H7NO3 | C10H16N2O7 | C10H16N2O7 | C10H14N2O6 | C10H14N2O6 | C5H7NO3 | C5H7NO3 | C5H7NO3 | C10H14N2O6 | C5H7NO3 | C5H7NO3	49.2 | 47.5 | 48.6 | 49.7 | 49.7 | 48.4 | 49.2 | 49.2 | 48.6 | 49.2 | 48.4 | 48.6 | 48.6	1.1639079727684 | 1.1639079727684 | 1.16390797254815 | 1.08799829365563 | 1.08799829365563 | 1.1639079727684 | 1.1639079727684 | 1.1639079727684 | 1.16390797298865 | 1.1639079727684 | 1.1639079727684 | 1.16390797254815 | 1.1639079727684	96.400045739905 | 96.400045739905 | 96.400045739905 | 95.5124729985208 | 95.5124729985208 | 95.763530601178 | 95.763530601178 | 96.400045739905 | 96.400045739905 | 96.400045739905 | 95.763530601178 | 96.400045739905 | 96.400045739905		257.078	1	6.25605	0.22865	3977.81	4108.27	3956.74	3873.46	3724.4	3986.82	1955.01	2289.33	2579.47	2343.8	2094.56	4504.59	5392.08	5670.78	4658.14	5812.71	3271.41	2541.37	2939.3	3316.05	3133.35	6333.58	4670.24	6471.64	5755.73	6143.91		1.34978	0.00225158	0.00207038
2.67_173.0087m/z	L3	HMDB0062803 | HMDB0062706 | HMDB0059784 | HMDB0041862 | HMDB0033717 | HMDB0006511 | HMDB0005971 | HMDB0001874 | HMDB0001264 | HMDB0000958 | HMDB0000193 | HMDB0000094 | HMDB0000072	2,3-diketogulonate | Dehydroascorbide(1-) | 5-Hydroxy-2-furoic acid | D-Glucaro-1,4-lactone | (1R,2R)-Isocitric acid | 2,3-Diketo-L-gulonate | Diketogulonic acid | D-threo-Isocitric acid | Dehydroascorbic acid | trans-Aconitic acid | Isocitric acid | Citric acid | cis-Aconitic acid	13	Endogenous|Food	HMDB0062803|HMDB0062706|HMDB0059784|HMDB0041862|HMDB0033717|HMDB0006511|HMDB0005971|HMDB0001874|HMDB0001264|HMDB0001182|HMDB0000958|HMDB0000786|HMDB0000292|HMDB0000193|HMDB0000094|HMDB0000072	2,3-diketogulonate|Dehydroascorbide(1-)|5-Hydroxy-2-furoic acid|D-Glucaro-1,4-lactone|(1R,2R)-Isocitric acid|2,3-Diketo-L-gulonate|Diketogulonic acid|D-threo-Isocitric acid|Dehydroascorbic acid|6,8-Dihydroxypurine|trans-Aconitic acid|Oxypurinol|Xanthine|Isocitric acid|Citric acid|cis-Aconitic acid	14.7|21.6|14.7|15.3|14.7|14.7|14.7|14.7|21.6|0|15.8|0|0|14.7|14.7|15.8	16	M-H2O-H | M-H | M+FA-H | M-H2O-H | M-H2O-H | M-H2O-H | M-H2O-H | M-H2O-H | M-H | M-H | M-H2O-H | M-H2O-H | M-H	C6H8O7 | C6H6O6 | C5H4O4 | C6H8O7 | C6H8O7 | C6H8O7 | C6H8O7 | C6H8O7 | C6H6O6 | C6H6O6 | C6H8O7 | C6H8O7 | C6H6O6	41.4 | 42.8 | 41.5 | 41.5 | 41.4 | 41.4 | 41.4 | 41.4 | 42.8 | 41.6 | 41.4 | 41.4 | 41.6	-2.43458471010076 | -2.686587026434 | -3.65210173813037 | -2.43458471010076 | -2.43458471010076 | -2.43458471024877 | -2.43458471010076 | -2.43458471010076 | -2.686587026434 | -2.68658702627067 | -2.43458471010076 | -2.43458471010076 | -2.686587026434	95.1118212627355 | 95.4386992350242 | 96.9246646566161 | 95.1118212627355 | 95.1118212627355 | 95.1118212627355 | 95.1118212627355 | 95.1118212627355 | 95.4386992350242 | 95.4386992350242 | 95.1118212627355 | 95.1118212627355 | 95.4386992350242		173.009	1	2.66732	0.162217	1085.65	1193.77	1135.92	1127.63	1198.67	881.588	841.046	1040	920.834	1242.75	737.756	1142.63	1252.64	884.177	1075.88	1165.85	820.311	589.876	639.492	781.34	860.497	1948.72	1415.53	1601.58	1891.39	1594.21		-1.29551	0.059994	0.0339173
7.29_211.0013m/z	L3	HMDB0130150 | HMDB0128619 | HMDB0128618 | HMDB0128617 | HMDB0062377 | HMDB0062194 | HMDB0061388 | HMDB0039147 | HMDB0012195 | HMDB0006534 | HMDB0003070 | HMDB0001548 | HMDB0001489	3,4,5-trihydroxycyclohex-1-ene-1-carboxylic acid | 5-hydroxy-1-oxo-1H-isochromene-3-carbaldehyde | 6-hydroxy-1-oxo-1H-isochromene-3-carbaldehyde | 7-hydroxy-1-oxo-1H-isochromene-3-carbaldehyde | 4(R),8-dimethyl-trans-2-nonenoyl-CoA | 2,6-dimethyl-trans-2-heptenoyl-CoA | Dimethyl 2-oxoglutarate | 6-Formylumbelliferone | Beta-L-arabinose 1-phosphate | D-Xylulose 1-phosphate | Shikimic acid | D-Ribo…	13	Endogenous|Food	HMDB0130150|HMDB0128619|HMDB0128618|HMDB0128617|HMDB0128616|HMDB0062377|HMDB0062194|HMDB0061388|HMDB0039147|HMDB0039045|HMDB0032944|HMDB0012195|HMDB0012149|HMDB0011734|HMDB0006534|HMDB0003070|HMDB0001548|HMDB0001489|HMDB0000868|HMDB0000618	3,4,5-trihydroxycyclohex-1-ene-1-carboxylic acid|5-hydroxy-1-oxo-1H-isochromene-3-carbaldehyde|6-hydroxy-1-oxo-1H-isochromene-3-carbaldehyde|7-hydroxy-1-oxo-1H-isochromene-3-carbaldehyde|1-oxo-1H-isochromene-3-carboxylic acid|4(R),8-dimethyl-trans-2-nonenoyl-CoA|2,6-dimethyl-trans-2-heptenoyl-CoA|Dimethyl 2-oxoglutarate|6-Formylumbelliferone|8H-1,3-Dioxolo[4,5-h][1]benzopyran-8-one|Coumarin-4-car…	28.4|20|20|20|0|24.4|24.4|24.4|20|0|0|29.6|0|10.6|32.7|28.4|29.4|30.7|10.6|10.6	20	M+K-2H | M+Na-2H | M+Na-2H | M+Na-2H | M+K-2H | M+K-2H | M+K-2H | M+Na-2H | M-H2O-H | M-H2O-H | M+K-2H | M-H2O-H | M-H2O-H	C7H10O5 | C10H6O4 | C10H6O4 | C10H6O4 | C7H10O5 | C7H10O5 | C7H10O5 | C10H6O4 | C5H11O8P | C5H11O8P | C7H10O5 | C5H11O8P | C5H11O8P	44.2 | 42.1 | 42.1 | 42.1 | 43.4 | 43.4 | 43.4 | 42.1 | 44.8 | 45.5 | 44.2 | 44.8 | 45.1	-0.91738996235954 | -0.039607469751691 | -0.039607469751691 | -0.039607469751691 | -0.917389962522833 | -0.917389962522833 | -0.917389962522833 | -0.039607469751691 | -0.19065830998526 | -0.190658309861697 | -0.91738996235954 | -0.19065830998526 | -0.1906	93.540747105542 | 90.761321851021 | 90.761321851021 | 90.761321851021 | 93.540747105542 | 93.540747105542 | 93.540747105542 | 90.761321851021 | 94.8869706911447 | 94.8869706911447 | 93.540747105542 | 94.8869706911447 | 94.8869706911447		211.001	1	7.28765	0.158167	1393.03	1365.35	1396.59	1343.3	1399.35	1321.84	1308.18	1273.99	1309.22	1309.93	1437.65	2168.17	1761.58	2090.54	2182.59	1920.29	970.467	1479.3	1042.36	1132.48	1126.73	894.437	1036.06	1031.74	1133.19	1047.89		-1.15434	0.0732379	0.040272
1.84_103.0399m/z	L3	HMDB0126088 | HMDB0062640 | HMDB0059748 | HMDB0031652 | HMDB0031558 | HMDB0031212 | HMDB0003366 | HMDB0000710 | HMDB0000442 | HMDB0000357 | HMDB0000336 | HMDB0000023 | HMDB0000011	3-hydroxy-2-methylpropanoic acid | 3-hydroxy-2-isobutyrate | 2-Methyl-3-hydroxypropanoate | Allyl alcohol | Methyloxirane | Ethoxyacetic acid | Propanal | 4-Hydroxybutyric acid | (S)-3-Hydroxybutyric acid | 3-Hydroxybutyric acid | (R)-3-Hydroxyisobutyric acid | (S)-3-Hydroxyisobutyric acid | (R)-3-Hydroxybutyric acid	13	Endogenous|Food	HMDB0126088|HMDB0094689|HMDB0062640|HMDB0059748|HMDB0031652|HMDB0031558|HMDB0031212|HMDB0004136|HMDB0003366|HMDB0002994|HMDB0001659|HMDB0000729|HMDB0000710|HMDB0000442|HMDB0000357|HMDB0000336|HMDB0000023|HMDB0000011|HMDB0000008|HMDB0000112|HMDB0001906|HMDB0003911	3-hydroxy-2-methylpropanoic acid|1,2,3,4-Tetrahydroxybutane|3-hydroxy-2-isobutyrate|2-Methyl-3-hydroxypropanoate|Allyl alcohol|Methyloxirane|Ethoxyacetic acid|D-Threitol|Propanal|Erythritol|Acetone|Alpha-Hydroxyisobutyric acid|4-Hydroxybutyric acid|(S)-3-Hydroxybutyric acid|3-Hydroxybutyric acid|(R)-3-Hydroxyisobutyric acid|(S)-3-Hydroxyisobutyric acid|(R)-3-Hydroxybutyric acid|2-Hydroxybutyric a…	24.4|19.6|24.4|33.6|30.8|27.6|22.8|19.6|22.8|19.6|12.5|20|37.5|22.8|22.8|24.4|24.4|22.8|9.65|0|0|0	22	M-H | M-H | M-H | M+FA-H | M+FA-H | M-H | M+FA-H | M-H | M-H | M-H | M-H | M-H | M-H	C4H8O3 | C4H8O3 | C4H8O3 | C3H6O | C3H6O | C4H8O3 | C3H6O | C4H8O3 | C4H8O3 | C4H8O3 | C4H8O3 | C4H8O3 | C4H8O3	44 | 44 | 45.9 | 45.2 | 44.6 | 43.7 | 43.6 | 46.7 | 43.7 | 43.7 | 44 | 44 | 43.7	-2.07292248617824 | -2.07292248617824 | -2.07292248617824 | -3.71595261346007 | -3.71595261358249 | -2.07292248604166 | -3.71595261370491 | -2.07292248617824 | -2.07292248631482 | -2.07292248631482 | -2.07292248617824 | -2.07292248631482 | -2.072922486041	98.3219140432689 | 98.3219140432689 | 98.3219140432689 | 99.6578339338326 | 99.6578339338326 | 98.3219140432689 | 99.6578339338326 | 98.3219140432689 | 98.3219140432689 | 98.3219140432689 | 98.3219140432689 | 98.3219140432689 | 98.3219140432689		103.04	1	1.84398	0.253983	5512.44	5431.79	5425.76	5569.8	5410.54	6034.89	3288.2	3167.01	3391.56	3164.57	2957.71	3836.39	3743.36	4724.97	4157.35	3971.62	3231.81	2586.07	3565.66	4282.22	4220.14	10429.5	8517.27	8549.53	8498.98	10017.4		1.12003	0.339101	0.143226
8.71_147.0293m/z	L3	HMDB0062739 | HMDB0060256 | HMDB0060255 | HMDB0059750 | HMDB0059655 | HMDB0011676 | HMDB0001900 | HMDB0000867 | HMDB0000694 | HMDB0000606 | HMDB0000539 | HMDB0000428 | HMDB0000426	3-methylmalate(2-) | L-Xylonate | L-Lyxonate | 2,3,4,5-Tetrahydroxypentanoic acid | 2-Hydroxyglutarate | D-Xylono-1,5-lactone | Ribonolactone | Ribonic acid | L-2-Hydroxyglutaric acid | D-2-Hydroxyglutaric acid | Arabinonic acid | 3-Hydroxyglutaric acid | Citramalic acid	13	Endogenous|Food	HMDB0062739|HMDB0060256|HMDB0060255|HMDB0059750|HMDB0059655|HMDB0011676|HMDB0003192|HMDB0002128|HMDB0001900|HMDB0000867|HMDB0000694|HMDB0000606|HMDB0000539|HMDB0000428|HMDB0000426	3-methylmalate(2-)|L-Xylonate|L-Lyxonate|2,3,4,5-Tetrahydroxypentanoic acid|2-Hydroxyglutarate|D-Xylono-1,5-lactone|5-Aminoimidazole-4-carboxamide|2,4-Diamino-6-hydroxypyrimidine|Ribonolactone|Ribonic acid|L-2-Hydroxyglutaric acid|D-2-Hydroxyglutaric acid|Arabinonic acid|3-Hydroxyglutaric acid|Citramalic acid	38.6|39|39|39|39.5|39.4|0|6.18|39.4|39|39.5|39.5|39|39.5|38.6	15	M-H | M-H2O-H | M-H2O-H | M-H2O-H | M-H | M-H | M-H | M-H2O-H | M-H | M-H | M-H2O-H | M-H | M-H	C5H8O5 | C5H10O6 | C5H10O6 | C5H10O6 | C5H8O5 | C5H8O5 | C5H8O5 | C5H10O6 | C5H8O5 | C5H8O5 | C5H10O6 | C5H8O5 | C5H8O5	46.2 | 46.3 | 46.3 | 46.3 | 46.4 | 46.3 | 46.3 | 46.3 | 46.4 | 46.4 | 46.3 | 46.4 | 46.2	-3.872992254658 | -3.45287766380653 | -3.45287766380653 | -3.45287766380653 | -3.872992254658 | -3.872992254658 | -3.87299225446601 | -3.45287766380653 | -3.87299225446601 | -3.87299225446601 | -3.45287766380653 | -3.872992254658 | -3.87299225446601	96.8071784870172 | 96.5631001804914 | 96.5631001804914 | 96.5631001804914 | 96.8071784870172 | 96.8071784870172 | 96.8071784870172 | 96.5631001804914 | 96.8071784870172 | 96.8071784870172 | 96.5631001804914 | 96.8071784870172 | 96.8071784870172		147.029	1	8.70667	0.293383	3825.85	4085.65	4055.89	3813.11	3844.2	3705.68	2947.37	3472.76	3288.62	3195.54	3539.58	2841.75	3866.61	3326.25	3170.85	3161.64	7626.75	4765.78	12141.5	7221.01	6010.11	5207.3	2298.87	2469.6	2440.11	3017.8		2.29661	0.00111538	0.00113725
1.88_158.0817m/z	L3	HMDB0062769 | HMDB0038625 | HMDB0037293 | HMDB0031702 | HMDB0031199 | HMDB0029412 | HMDB0029409 | HMDB0029230 | HMDB0012175 | HMDB0012154 | HMDB0011757 | HMDB0000927 | HMDB0000678 | HMDB0000339	Epsilon-caprolactam | Medicanine | 2-Acetylpyrrolidine | 1-Piperidinecarboxaldehyde | 2,5-Dihydro-2,4,5-trimethyloxazole | Betonicine | Turicine | 4-Hydroxystachydrine | 5-Acetamidovalerate | 3-Dehydrocarnitine | N-Acetylvaline | Valerylglycine | Isovalerylglycine | 2-Methylbutyrylglycine	14	Endogenous|Food	HMDB0062769|HMDB0061678|HMDB0038625|HMDB0038593|HMDB0037293|HMDB0036384|HMDB0035360|HMDB0031702|HMDB0031345|HMDB0031199|HMDB0029412|HMDB0029409|HMDB0029230|HMDB0012175|HMDB0012154|HMDB0011757|HMDB0000927|HMDB0000678|HMDB0000339	Epsilon-caprolactam|Methyl 5-(hydroxymethyl)pyrrolidine-3-carboxylate|Medicanine|Calystegin A3|2-Acetylpyrrolidine|Calystegine A7|N-Methyl-1-deoxynojirimycin|1-Piperidinecarboxaldehyde|Calystegine A6|2,5-Dihydro-2,4,5-trimethyloxazole|Betonicine|Turicine|4-Hydroxystachydrine|5-Acetamidovalerate|3-Dehydrocarnitine|N-Acetylvaline|Valerylglycine|Isovalerylglycine|2-Methylbutyrylglycine	30.8|0|16|11.2|18.4|11.2|10.7|25.6|11.2|16.6|27.1|27.1|27.1|16|16|16|16|16|16	19	M+FA-H | M-H | M+FA-H | M+FA-H | M+FA-H | M-H | M-H | M-H | M-H | M-H | M-H | M-H | M-H | M-H	C6H11NO | C7H13NO3 | C6H11NO | C6H11NO | C6H11NO | C7H13NO3 | C7H13NO3 | C7H13NO3 | C7H13NO3 | C7H13NO3 | C7H13NO3 | C7H13NO3 | C7H13NO3 | C7H13NO3	44.7 | 41.7 | 42.2 | 43.6 | 41.8 | 43.9 | 43.9 | 43.9 | 41.7 | 41.7 | 41.7 | 41.7 | 41.7 | 41.7	-4.98093771751449 | -3.54055915872613 | -4.98093771738883 | -4.98093771751449 | -4.98093771738883 | -3.54055915872613 | -3.54055915854748 | -3.54055915890478 | -3.54055915872613 | -3.54055915872613 | -3.54055915872613 | -3.54055915872613 | -3.540559158726	98.3056403455267 | 96.7958464422555 | 98.3056403455267 | 98.3056403455267 | 98.3056403455267 | 96.7958464422555 | 96.7958464422555 | 96.7958464422555 | 96.7958464422555 | 96.7958464422555 | 96.7958464422555 | 96.7958464422555 | 96.7958464422555 | 96.7958464422555		158.082	1	1.87902	0.253983	6291.5	6268.46	6299.28	6162.64	6391.47	6019.26	4540.53	4457.69	4997.49	4706.8	5189.31	6804.42	7221.23	7911.02	7680.53	8562.95	4734.49	5109.07	6332.97	7379.8	4846.81	5996.69	7115.94	6024.04	6199.61	7254.19		1.18882	0.117754	0.0600186
1.49_775.5507m/z	L3	HMDB0115455 | HMDB0115273 | HMDB0115096 | HMDB0115069 | HMDB0115068 | HMDB0114931 | HMDB0114906 | HMDB0114882 | HMDB0114844 | HMDB0114794 | HMDB0010632 | HMDB0010617 | HMDB0010604 | HMDB0010603	PA(24:1(15Z)/14:0) | PA(22:1(13Z)/16:0) | PA(20:1(11Z)/18:0) | PA(20:0/18:1(9Z)) | PA(20:0/18:1(11Z)) | PA(18:1(9Z)/20:0) | PA(18:1(11Z)/20:0) | PA(18:0/20:1(11Z)) | PA(16:0/22:1(13Z)) | PA(14:0/24:1(15Z)) | PG(18:1(9Z)/18:0) | PG(18:1(11Z)/18:0) | PG(18:0/18:1(9Z)) | PG(18:0/18:1(11Z))	14	Endogenous|Food	HMDB0115455|HMDB0115429|HMDB0115273|HMDB0115244|HMDB0115096|HMDB0115069|HMDB0115068|HMDB0114931|HMDB0114906|HMDB0114882|HMDB0114864|HMDB0114844|HMDB0114810|HMDB0114794|HMDB0010632|HMDB0010617|HMDB0010604|HMDB0010603	PA(24:1(15Z)/14:0)|PA(24:0/14:1(9Z))|PA(22:1(13Z)/16:0)|PA(22:0/16:1(9Z))|PA(20:1(11Z)/18:0)|PA(20:0/18:1(9Z))|PA(20:0/18:1(11Z))|PA(18:1(9Z)/20:0)|PA(18:1(11Z)/20:0)|PA(18:0/20:1(11Z))|PA(16:1(9Z)/22:0)|PA(16:0/22:1(13Z))|PA(14:1(9Z)/24:0)|PA(14:0/24:1(15Z))|PG(18:1(9Z)/18:0)|PG(18:1(11Z)/18:0)|PG(18:0/18:1(9Z))|PG(18:0/18:1(11Z))	24.9|7.21|24.9|7.21|25.1|31.6|31.6|31.6|31.6|25.1|7.21|24.9|7.21|24.9|32.5|32.5|32.5|32.5	18	M+FA-H | M+FA-H | M+FA-H | M+FA-H | M+FA-H | M+FA-H | M+FA-H | M+FA-H | M+FA-H | M+FA-H | M-H | M-H | M-H | M-H	C41H79O8P | C41H79O8P | C41H79O8P | C41H79O8P | C41H79O8P | C41H79O8P | C41H79O8P | C41H79O8P | C41H79O8P | C41H79O8P | C42H81O10P | C42H81O10P | C42H81O10P | C42H81O10P	42.9 | 42.9 | 42.9 | 44.2 | 44.2 | 44.2 | 44.2 | 42.9 | 42.9 | 42.9 | 44.2 | 44.2 | 44.2 | 44.2	1.66309309949938 | 1.66309309949938 | 1.66309309949938 | 1.663093099655 | 1.663093099655 | 1.66309309949938 | 1.66309309949938 | 1.663093099655 | 1.663093099655 | 1.663093099655 | 1.56456500532486 | 1.56456500532486 | 1.56456500547126 | 1.56456500547126	91.584353496816 | 91.584353496816 | 91.584353496816 | 91.584353496816 | 91.584353496816 | 91.584353496816 | 91.584353496816 | 91.584353496816 | 91.584353496816 | 91.584353496816 | 90.1524018172651 | 90.1524018172651 | 90.1524018172651 | 90.1524018172651		775.551	1	1.4893	0.30215	118134	112767	109817	110495	108580	100387	82937.5	85619.2	101933	98427.8	101394	108955	102562	107636	120716	129751	241787	329796	275390	233003	220438	126804	125188	159946	152162	134335		2.765	2.2e-06	5.88e-06
10.46_655.1114m/z	L3	HMDB0140684 | HMDB0140683 | HMDB0135138 | HMDB0135137 | HMDB0135136 | HMDB0128464 | HMDB0128463 | HMDB0128462 | HMDB0128461 | HMDB0128459 | HMDB0038806 | HMDB0031533 | HMDB0030753 | HMDB0030479 | HMDB0013647	11,15,16-trihydroxy-6,8,20-trioxapentacyclo[10.8.0.0Â²,â¹.0Â³,â·.0Â¹â´,Â¹â¹]icosa-1(12),2(9),10,14(19),15,17-hexaen-13-one | 11,15,17-trihydroxy-6,8,20-trioxapentacyclo[10.8.0.0Â²,â¹.0Â³,â·.0Â¹â´,Â¹â¹]icosa-1(12),2(9),10,14,16,18-hexaen-13-one | [7-hydroxy-2-(3-hydroxyphenyl)-4-[3,5,7-trihydroxy-2-(3-hydroxyphenyl)-3,4-dihydro-2H-1-benzopyran-8-yl]-3,4-dihydro-2H-1-benzopyran-3-yl]oxidane…	15	Endogenous|Food	HMDB0142058|HMDB0140684|HMDB0140683|HMDB0135138|HMDB0135137|HMDB0135136|HMDB0128464|HMDB0128463|HMDB0128462|HMDB0128461|HMDB0128459|HMDB0038806|HMDB0031533|HMDB0030753|HMDB0030479|HMDB0030474|HMDB0013647|HMDB0006558	12-methoxy-5,7,9,20-tetraoxahexacyclo[11.7.0.0Â²,Â¹â°.0Â³,â¸.0â´,â¶.0Â¹â´,Â¹â¸]icosa-1(13),2(10),11,14(18)-tetraene-17,19-dione|11,15,16-trihydroxy-6,8,20-trioxapentacyclo[10.8.0.0Â²,â¹.0Â³,â·.0Â¹â´,Â¹â¹]icosa-1(12),2(9),10,14(19),15,17-hexaen-13-one|11,15,17-trihydroxy-6,8,20-trioxapentacyclo[10.8.0.0Â²,â¹.0Â³,â·.0Â¹â´,Â¹â¹]icosa-1(12),2(9),10,14,16,18-hexaen-13-one|[7-hydroxy-2-(3…	7.01|30.2|30.2|20.3|21.6|20.3|30.2|30.2|30.2|30.2|30.2|32.9|30.3|32.9|32.9|9.73|20.3|7.01	18	2M-H | 2M-H | M+FA-H | M+FA-H | M+FA-H | 2M-H | 2M-H | 2M-H | 2M-H | 2M-H | 2M-H | 2M-H | 2M-H | 2M-H | M-H2O-H	C17H12O7 | C17H12O7 | C30H26O12S | C30H26O12S | C30H26O12S | C17H12O7 | C17H12O7 | C17H12O7 | C17H12O7 | C17H12O7 | C17H12O7 | C17H12O7 | C17H12O7 | C17H12O7 | C22H30N9O10P2S+	44.6 | 44.6 | 39.5 | 39.8 | 39.5 | 44.6 | 44.6 | 44.6 | 44.6 | 44.6 | 45.1 | 44.6 | 45.1 | 45.1 | 40.3	3.17813334440996 | 3.17813334440996 | -2.10763875304396 | -2.10763875304396 | -2.10763875304396 | 3.17813334440996 | 3.17813334440996 | 3.17813334440996 | 3.17813334440996 | 3.17813334440996 | 3.17813334440996 | 3.17813334440996 | 3.17813334440996 | 3.17813334440996 | -2.82156268448967	96.4364723724794 | 96.4364723724794 | 79.7504372570431 | 79.7504372570431 | 79.7504372570431 | 96.4364723724794 | 96.4364723724794 | 96.4364723724794 | 96.4364723724794 | 96.4364723724794 | 96.4364723724794 | 96.4364723724794 | 96.4364723724794 | 96.4364723724794 | 84.4611906639544		655.111	1	10.4617	0.2324	15016.3	13848	15453.1	18050	18122.2	22865.4	7078.86	6173.05	9311.66	8873.6	8664.1	11748.5	12049.4	9968.38	12974.5	13513.4	22154.6	25629.2	20920	19149.4	24977.6	18266.5	20036.4	16979.8	17868.8	18778.9		2.81365	4.36e-06	1.02e-05
1.61_165.0188m/z	L3	HMDB0140912 | HMDB0130482 | HMDB0130408 | HMDB0130407 | HMDB0130405 | HMDB0126480 | HMDB0125542 | HMDB0125522 | HMDB0061917 | HMDB0032613 | HMDB0013198 | HMDB0002428 | HMDB0002334 | HMDB0002107 | HMDB0001866	2,3-dihydroxy-4-methoxybenzoic acid | 2,5-dihydroxy-4-methoxybenzoic acid | 2-(2,4,5-trihydroxyphenyl)acetic acid | 2-(2,3,4-trihydroxyphenyl)acetic acid | 2-(3,4,5-trihydroxyphenyl)acetic acid | 2-(2,4-dihydroxyphenyl)-2-hydroxyacetic acid | 2,4-dihydroxy-3-methoxybenzoic acid | 2,4-dihydroxy-5-methoxybenzoic acid | Terephthalate | 3,4-Methylenedioxybenzoic acid | 4-O-Methylgallic acid | Terepht…	15	Endogenous|Food	HMDB0140912|HMDB0130482|HMDB0130408|HMDB0130407|HMDB0130405|HMDB0126480|HMDB0125542|HMDB0125522|HMDB0061917|HMDB0032613|HMDB0029650|HMDB0013198|HMDB0002428|HMDB0002334|HMDB0002107|HMDB0001866	2,3-dihydroxy-4-methoxybenzoic acid|2,5-dihydroxy-4-methoxybenzoic acid|2-(2,4,5-trihydroxyphenyl)acetic acid|2-(2,3,4-trihydroxyphenyl)acetic acid|2-(3,4,5-trihydroxyphenyl)acetic acid|2-(2,4-dihydroxyphenyl)-2-hydroxyacetic acid|2,4-dihydroxy-3-methoxybenzoic acid|2,4-dihydroxy-5-methoxybenzoic acid|Terephthalate|3,4-Methylenedioxybenzoic acid|Methyl 2,4,6-trihydroxybenzoate|4-O-Methylgallic ac…	20.1|25.2|21.4|21.4|21.4|21.4|24.3|25.2|22.6|22.5|2.94|24.3|22.6|22.6|22.6|21.4	16	M-H2O-H | M-H2O-H | M-H2O-H | M-H2O-H | M-H2O-H | M-H2O-H | M-H2O-H | M-H2O-H | M-H | M-H | M-H2O-H | M-H | M-H | M-H | M-H2O-H	C8H8O5 | C8H8O5 | C8H8O5 | C8H8O5 | C8H8O5 | C8H8O5 | C8H8O5 | C8H8O5 | C8H6O4 | C8H6O4 | C8H8O5 | C8H6O4 | C8H6O4 | C8H6O4 | C8H8O5	42.7 | 43.7 | 42.9 | 42.9 | 42.9 | 42.9 | 43.5 | 43.7 | 43.1 | 43.1 | 43.5 | 43.1 | 43.1 | 43.1 | 42.9	-2.87327388631325 | -2.87327388631325 | -2.87327388631325 | -2.87327388631325 | -2.87327388631325 | -2.87327388631325 | -2.87327388631325 | -2.87327388631325 | -3.18499250541591 | -3.18499250541591 | -2.87327388615882 | -3.18499250541591 | -3.184992505587	96.650710100293 | 96.650710100293 | 96.650710100293 | 96.650710100293 | 96.650710100293 | 96.650710100293 | 96.650710100293 | 96.650710100293 | 96.8896308762353 | 96.8896308762353 | 96.650710100293 | 96.8896308762353 | 96.8896308762353 | 96.8896308762353 | 96.650710100293		165.019	1	1.60753	0.3109	6957.89	7258.94	7151.69	6644.28	6813.35	6401.42	11675.1	7528.75	6198.07	7052.99	7308.26	6075.7	5815.44	6906.87	5776.55	6562.27	7389.39	7563.48	8537.95	8456.66	7332.62	6144.32	6534.44	5935.03	7490.01	5994.13		-1.0123	0.928226	0.309289
1.40_185.0815m/z	L3	HMDB0060682 | HMDB0040526 | HMDB0040463 | HMDB0039681 | HMDB0039680 | HMDB0039673 | HMDB0039652 | HMDB0039651 | HMDB0037625 | HMDB0037196 | HMDB0037167 | HMDB0036176 | HMDB0032311 | HMDB0030992 | HMDB0030988	2-Propyl-2,4-pentadienoic acid | 3,4,4-Trimethyl-1,2-cyclopentanedione | Ethyl sorbate | 3-Isopropyl-1,2-cyclopentanedione | 3,5,5-Trimethyl-1,2-cyclopentanedione | 4-Ethyl-2-hydroxy-3-methyl-2-cyclopenten-1-one | 2-Hydroxy-3,4,5-trimethyl-2-cyclopenten-1-one | 3-Propyl-1,2-cyclopentanedione | Allyl tiglate | Ethyl 2-methyl-3,4-pentadienoate | 3-Ethyl-5-methyl-1,2-cyclopentanedione | 3-Ethyl-2-hy…	15	Endogenous|Food	HMDB0061017|HMDB0060682|HMDB0040526|HMDB0040463|HMDB0039681|HMDB0039680|HMDB0039673|HMDB0039652|HMDB0039651|HMDB0037625|HMDB0037196|HMDB0037167|HMDB0036176|HMDB0032311|HMDB0030992|HMDB0030988	1-Pyrimidinylpiperazine|2-Propyl-2,4-pentadienoic acid|3,4,4-Trimethyl-1,2-cyclopentanedione|Ethyl sorbate|3-Isopropyl-1,2-cyclopentanedione|3,5,5-Trimethyl-1,2-cyclopentanedione|4-Ethyl-2-hydroxy-3-methyl-2-cyclopenten-1-one|2-Hydroxy-3,4,5-trimethyl-2-cyclopenten-1-one|3-Propyl-1,2-cyclopentanedione|Allyl tiglate|Ethyl 2-methyl-3,4-pentadienoate|3-Ethyl-5-methyl-1,2-cyclopentanedione|3-Ethyl-2-…	5.48|31.2|38.3|27.1|34.5|26.4|39.2|30.5|35.3|26.4|27.1|27.3|39.1|34.3|36.9|36.9	16	M+FA-H | M+FA-H | M+FA-H | M+FA-H | M+FA-H | M+FA-H | M+FA-H | M+FA-H | M+FA-H | M+FA-H | M+FA-H | M+FA-H | M+FA-H | M-H | M-H	C8H12O2 | C8H12O2 | C8H12O2 | C8H12O2 | C8H12O2 | C8H12O2 | C8H12O2 | C8H12O2 | C8H12O2 | C8H12O2 | C8H12O2 | C8H12O2 | C8H12O2 | C9H14O4 | C9H14O4	44.7 | 46.1 | 43.9 | 45.4 | 43.8 | 46.3 | 44.6 | 45.5 | 43.8 | 43.9 | 43.9 | 46.3 | 45.3 | 45.7 | 45.7	-2.73836583747949 | -2.73836583747949 | -2.73836583747949 | -2.73836583747949 | -2.73836583747949 | -2.73836583747949 | -2.73836583747949 | -2.73836583747949 | -2.73836583747949 | -2.73836583747949 | -2.73836583747949 | -2.73836583747949 | -2.738365837479	95.6220374865907 | 95.6220374865907 | 95.6220374865907 | 95.6220374865907 | 95.6220374865907 | 95.6220374865907 | 95.6220374865907 | 95.6220374865907 | 95.6220374865907 | 95.6220374865907 | 95.6220374865907 | 95.6220374865907 | 95.6220374865907 | 94.1638820413787 | 94.1638820413787		185.082	1	1.39733	0.284633	4487.2	4620.85	4380.43	4639.47	4471.25	4916.75	5303.01	4840.06	4622.88	4643.29	4536.29	3680.85	3600.97	3862.31	3754.96	3758.06	4128.06	4893.99	4525	4233.5	4434.95	3513.19	4371.32	3554.51	3921.64	3866.78		-1.07788	0.101633	0.0533043
4.26_149.0449m/z	L3	HMDB0127617 | HMDB0094694 | HMDB0060254 | HMDB0059753 | HMDB0029942 | HMDB0029941 | HMDB0012325 | HMDB0003371 | HMDB0001644 | HMDB0000751 | HMDB0000646 | HMDB0000621 | HMDB0000366 | HMDB0000283 | HMDB0000098	3-hydroxy-2,2-bis(hydroxymethyl)propanoic acid | beta-Arabinose | Aldehydo-D-xylose | 2-Deoxypentonic acid | D-Arabinose | D-Apiose | Arabinofuranose | L-Ribulose | D-Xylulose | L-Threo-2-pentulose | L-Arabinose | D-Ribulose | 2-Deoxyribonic acid | D-Ribose | D-Xylose	15	Endogenous|Food	HMDB0127617|HMDB0094694|HMDB0060254|HMDB0059753|HMDB0029942|HMDB0029941|HMDB0012325|HMDB0003371|HMDB0001644|HMDB0000751|HMDB0000646|HMDB0000621|HMDB0000366|HMDB0000283|HMDB0000098	3-hydroxy-2,2-bis(hydroxymethyl)propanoic acid|beta-Arabinose|Aldehydo-D-xylose|2-Deoxypentonic acid|D-Arabinose|D-Apiose|Arabinofuranose|L-Ribulose|D-Xylulose|L-Threo-2-pentulose|L-Arabinose|D-Ribulose|2-Deoxyribonic acid|D-Ribose|D-Xylose	10.6|22.9|20.1|17.9|16.7|20.7|22.9|21.9|15.7|15.7|20.1|15.7|17.9|22.9|20.1	15	M-H	C5H10O5	40.5 | 42.9 | 42.4 | 41.9 | 41.7 | 42.5 | 42.9 | 42.7 | 41.5 | 41.5 | 42.4 | 41.5 | 41.9 | 42.9 | 42.4	-4.09132639395764 | -4.09132639395764 | -4.09132639395764 | -4.09132639395764 | -4.09132639395764 | -4.09132639395764 | -4.09132639395764 | -4.09132639395764 | -4.09132639395764 | -4.09132639395764 | -4.09132639395764 | -4.09132639395764 | -4.091326394147	96.5506		149.045	1	4.25813	0.315317	7898.4	8513.43	8117.8	7609.89	7855.63	6344.35	5659.1	6108.78	5629.07	5653.29	5897.38	10436.1	12004.3	10417.9	11404.2	11275.8	7824.37	3837.01	5809.55	6723.01	6684.78	9410.9	7420.21	7757.65	7895.47	9636.5		1.06671	0.765744	0.268259
7.98_515.0612m/z	L3	HMDB0133822 | HMDB0129320 | HMDB0129310 | HMDB0128549 | HMDB0126573 | HMDB0126140 | HMDB0040510 | HMDB0040509 | HMDB0039338 | HMDB0039211 | HMDB0037360 | HMDB0037332 | HMDB0036120 | HMDB0033650 | HMDB0030805 | HMDB0030548 | HMDB0029479	2-(3,4-dihydroxyphenyl)-5-hydroxy-7-methoxy-3-{[3,4,5-trihydroxy-6-(hydroxymethyl)oxan-2-yl]oxy}-4H-chromen-4-one | 2-(2,5-dihydroxy-4-methoxyphenyl)-5,7-dihydroxy-8-[3,4,5-trihydroxy-6-(hydroxymethyl)oxan-2-yl]-4H-chromen-4-one | 5,6,7-trihydroxy-2-(4-hydroxy-3-methoxyphenyl)-8-[3,4,5-trihydroxy-6-(hydroxymethyl)oxan-2-yl]-4H-chromen-4-one | 5-hydroxy-7-methoxy-6-[3,4,5-trihydroxy-6-(hydroxymeth…	17	Endogenous|Food	HMDB0137325|HMDB0133844|HMDB0133842|HMDB0133822|HMDB0130197|HMDB0130196|HMDB0130195|HMDB0130194|HMDB0130193|HMDB0130192|HMDB0129991|HMDB0129990|HMDB0129989|HMDB0129425|HMDB0129320|HMDB0129310|HMDB0128599|HMDB0128598|HMDB0128597|HMDB0128549|HMDB0128149|HMDB0128148|HMDB0128147|HMDB0128146|HMDB0128145|HMDB0128144|HMDB0128121|HMDB0128120|HMDB0128119|HMDB0128068|HMDB0128067|HMDB0128066|HMDB0128065|HMD…	3,4,5-trihydroxy-6-{[5-hydroxy-2-(2-hydroxyphenyl)-6-methoxy-4-oxo-3,4-dihydro-2H-1-benzopyran-7-yl]oxy}oxane-2-carboxylic acid|6-[2-(5,7-dihydroxy-4-oxo-3,4-dihydro-2H-1-benzopyran-3-yl)-5-methoxyphenoxy]-3,4,5-trihydroxyoxane-2-carboxylic acid|3,4,5-trihydroxy-6-{[7-hydroxy-3-(2-hydroxy-4-methoxyphenyl)-4-oxo-3,4-dihydro-2H-1-benzopyran-5-yl]oxy}oxane-2-carboxylic acid|2-(3,4-dihydroxyphenyl)-5…	9.51|1.86|9.49|21.2|1.86|1.86|1.86|1.86|1.89|1.89|1.86|1.86|1.86|1.89|21.2|28.8|1.89|9.51|9.51|21.2|1.86|1.86|1.86|1.86|9.81|9.81|1.86|1.86|1.86|9.6|9.94|9.94|1.89|9.51|9.51|1.86|1.86|9.49|9.49|1.86|1.86|9.49|9.49|21.2|21.2|1.86|1.86|1.86|1.86|9.51|1.89|21.2|21.2|21.2|21.2|1.86|21.2|28.8|21.2|28.8|21.2|21.2|21.2	63	M+K-2H	C22H22O12	40.4 | 40.4 | 41.9 | 40.4 | 40.4 | 40.4 | 40.4 | 40.4 | 40.4 | 40.4 | 40.4 | 41.9 | 40.4 | 41.9 | 40.4 | 40.4 | 40.4	3.00656306130376 | 3.00656306130376 | 3.00656306130376 | 3.00656306130376 | 3.00656306130376 | 3.00656306130376 | 3.00656306130376 | 3.00656306130376 | 3.00656306130376 | 3.00656306130376 | 3.00656306142265 | 3.00656306130376 | 3.00656306130376 | 3.00656306130376 | 3.00656306130376 | 3.00656306130376 | 3.00656306142265	84.1161		515.061	1	7.98413	0.126983	4478.99	5241.82	4424.24	4293.09	3835.1	2879.88	12128.2	16700.9	11671	12200.7	19847.2	11736.9	9440.02	1749.1	13361.3	9960.57	2120.63	0	1363.74	388.276	1815.83	471.77	0	0	0	1788.69		-12.7535	0.0348377	0.0214215
1.38_173.1178m/z	L3	HMDB0061913 | HMDB0061912 | HMDB0037181 | HMDB0035768 | HMDB0035231 | HMDB0032450 | HMDB0032402 | HMDB0031513 | HMDB0031300 | HMDB0031299 | HMDB0031298 | HMDB0031296 | HMDB0031295 | HMDB0031294 | HMDB0030030 | HMDB0029574 | HMDB0001140	3,5-Dimethylcyclohexanol | 3,4-Dimethylcyclohexanol | xi-7-Octen-2-ol | (E)-3-Octen-1-ol | (Z)-3-Octen-1-ol | trans-3-Octen-2-ol | 2-Methyl-3-heptanone | (Â±)-3-Hydroxynonanoic acid | (Â±)-(E)-2-Octen-4-ol | (R)-1-Octen-3-ol | (Z)-5-Octen-1-ol | (E)-2-Octen-1-ol | Ethyl pentyl ketone | 2-Octanone | (R)-Sulcatol | 2,5-Diethyltetrahydrofuran | Octanal	17	Endogenous|Food	HMDB0061913|HMDB0061912|HMDB0037181|HMDB0035768|HMDB0035231|HMDB0034040|HMDB0032450|HMDB0032402|HMDB0031513|HMDB0031300|HMDB0031299|HMDB0031298|HMDB0031296|HMDB0031295|HMDB0031294|HMDB0030030|HMDB0029574|HMDB0001140	3,5-Dimethylcyclohexanol|3,4-Dimethylcyclohexanol|xi-7-Octen-2-ol|(E)-3-Octen-1-ol|(Z)-3-Octen-1-ol|2,4,6-Triethyl-1,3,5-trioxane|trans-3-Octen-2-ol|2-Methyl-3-heptanone|(Â±)-3-Hydroxynonanoic acid|(Â±)-(E)-2-Octen-4-ol|(R)-1-Octen-3-ol|(Z)-5-Octen-1-ol|(E)-2-Octen-1-ol|Ethyl pentyl ketone|2-Octanone|(R)-Sulcatol|2,5-Diethyltetrahydrofuran|Octanal	24.5|24.5|18.8|25.2|25.2|5.93|25.2|16.5|25.6|25|25.4|24.1|25.3|16.8|16.8|24.1|16|16.8	18	M+FA-H | M+FA-H | M+FA-H | M+FA-H | M+FA-H | M+FA-H | M+FA-H | M-H | M+FA-H | M+FA-H | M+FA-H | M+FA-H | M+FA-H | M+FA-H | M+FA-H | M+FA-H | M+FA-H	C8H16O | C8H16O | C8H16O | C8H16O | C8H16O | C8H16O | C8H16O | C9H18O3 | C8H16O | C8H16O | C8H16O | C8H16O | C8H16O | C8H16O | C8H16O | C8H16O | C8H16O	43.4 | 43.4 | 42.3 | 43.6 | 43.6 | 43.6 | 41.8 | 43.6 | 43.5 | 43.6 | 43.3 | 43.6 | 41.9 | 41.9 | 43.3 | 41.7 | 41.9	-3.71607888824194 | -3.71607888824194 | -3.71607888824194 | -3.71607888824194 | -3.71607888824194 | -3.71607888824194 | -3.71607888824194 | -2.73426612879981 | -3.71607888824194 | -3.71607888824194 | -3.71607888824194 | -3.71607888824194 | -3.716078888241	96.8748567044613 | 96.8748567044613 | 96.8748567044613 | 96.8748567044613 | 96.8748567044613 | 96.8748567044613 | 96.8748567044613 | 95.3948993507831 | 96.8748567044613 | 96.8748567044613 | 96.8748567044613 | 96.8748567044613 | 96.8748567044613 | 96.8748567044613 | 96.8748567044613 | 96.8748567044613 | 96.8748567044613		173.118	1	1.37982	0.179533	3028.72	3158.79	3136.59	3252.36	3323.87	3301.93	1597.08	1497.05	1748.52	1513.06	2186.29	2089.24	1555.07	1972.26	1919.21	2311.12	1285.88	1859.61	1738.11	1703.12	1577.13	1066.82	2492.13	1315.45	1615.56	2711.33		-1.04632	0.662087	0.241045
3.53_129.0187m/z	L3	HMDB0062739 | HMDB0061185 | HMDB0060365 | HMDB0059743 | HMDB0059655 | HMDB0033809 | HMDB0013233 | HMDB0011676 | HMDB0002092 | HMDB0001900 | HMDB0000749 | HMDB0000694 | HMDB0000634 | HMDB0000620 | HMDB0000606 | HMDB0000428 | HMDB0000426	3-methylmalate(2-) | 2-Pentendioate | 2,5-Dioxopentanoate | 2-Hydroxyglutaric acid lactone | 2-Hydroxyglutarate | Methyl hydrogen fumarate | Gamma-delta-Dioxovaleric acid | D-Xylono-1,5-lactone | Itaconic acid | Ribonolactone | Mesaconic acid | L-2-Hydroxyglutaric acid | Citraconic acid | Glutaconic acid | D-2-Hydroxyglutaric acid | 3-Hydroxyglutaric acid | Citramalic acid	17	Endogenous|Food	HMDB0062739|HMDB0061185|HMDB0060365|HMDB0059743|HMDB0059655|HMDB0033809|HMDB0013233|HMDB0011676|HMDB0002092|HMDB0001900|HMDB0000749|HMDB0000694|HMDB0000634|HMDB0000620|HMDB0000606|HMDB0000428|HMDB0000426	3-methylmalate(2-)|2-Pentendioate|2,5-Dioxopentanoate|2-Hydroxyglutaric acid lactone|2-Hydroxyglutarate|Methyl hydrogen fumarate|Gamma-delta-Dioxovaleric acid|D-Xylono-1,5-lactone|Itaconic acid|Ribonolactone|Mesaconic acid|L-2-Hydroxyglutaric acid|Citraconic acid|Glutaconic acid|D-2-Hydroxyglutaric acid|3-Hydroxyglutaric acid|Citramalic acid	26.8|18.1|29.7|29.7|26.8|18.1|30.5|29|18|29.1|18.1|26.8|18.1|18.1|26.8|26|26.7	17	M-H2O-H | M-H | M-H | M-H | M-H2O-H | M-H | M-H | M-H2O-H | M-H | M-H2O-H | M-H | M-H2O-H | M-H | M-H | M-H2O-H | M-H2O-H | M-H2O-H	C5H8O5 | C5H6O4 | C5H6O4 | C5H6O4 | C5H8O5 | C5H6O4 | C5H6O4 | C5H8O5 | C5H6O4 | C5H8O5 | C5H6O4 | C5H8O5 | C5H6O4 | C5H6O4 | C5H8O5 | C5H8O5 | C5H8O5	43.6 | 41.8 | 44.1 | 44.1 | 43.6 | 41.8 | 44.3 | 44 | 41.8 | 44.1 | 41.8 | 43.6 | 41.8 | 41.8 | 43.6 | 43.4 | 43.6	-4.25154342127395 | -4.84047670641452 | -4.84047670641452 | -4.84047670619594 | -4.25154342127395 | -4.84047670641452 | -4.84047670641452 | -4.25154342127395 | -4.84047670641452 | -4.25154342108196 | -4.84047670619594 | -4.25154342108196 | -4.840476706195	96.1435013855198 | 96.3871011559738 | 96.3871011559738 | 96.3871011559738 | 96.1435013855198 | 96.3871011559738 | 96.3871011559738 | 96.1435013855198 | 96.3871011559738 | 96.1435013855198 | 96.3871011559738 | 96.1435013855198 | 96.3871011559738 | 96.3871011559738 | 96.1435013855198 | 96.1435013855198 | 96.1435013855198		129.019	1	3.52603	0.192667	1358.41	1417.1	1394.11	1430.52	1421.55	1285.77	1229.51	1110.37	1138.92	1148.59	1170.53	1573.77	1763.43	1693.49	1621.55	1752.93	1387.58	1008.77	1632.35	1315.96	1142.24	1632.29	1355.57	1546.67	1472.15	1605.8		1.11883	0.272302	0.120762
1.72_159.0657m/z	L3	HMDB0061676 | HMDB0060476 | HMDB0059738 | HMDB0033568 | HMDB0031562 | HMDB0031561 | HMDB0031560 | HMDB0031501 | HMDB0031492 | HMDB0031158 | HMDB0029487 | HMDB0029167 | HMDB0010719 | HMDB0003843 | HMDB0002441 | HMDB0000857 | HMDB0000555 | HMDB0000453	2,2-Dimethylglutaric acid | epsilon-Caprolactone | 2-Ethylglutaric acid | 5-Oxohexanal | 2-Methyl-3-pentenoic acid | 4-Methyl-2-pentenoic acid | 2-Methyl-2-pentenoic acid | 3-Hexenoic acid | 3,4-Hexanedione | 2-Methyl-4-pentenoic acid | Allyl propionate | 2-Methyladipic acid | trans-Hex-2-enoic acid | Gamma-Caprolactone | 3,3-Dimethylglutaric acid | Pimelic acid | 3-Methyladipic acid | Delta-Hexa…	18	Endogenous|Food	HMDB0061929|HMDB0061676|HMDB0060476|HMDB0059893|HMDB0059738|HMDB0059722|HMDB0041605|HMDB0040328|HMDB0039581|HMDB0033789|HMDB0033568|HMDB0032490|HMDB0031562|HMDB0031561|HMDB0031560|HMDB0031559|HMDB0031501|HMDB0031492|HMDB0031491|HMDB0031158|HMDB0029573|HMDB0029487|HMDB0029167|HMDB0010719|HMDB0003843|HMDB0002441|HMDB0000857|HMDB0000555|HMDB0000453	Dihydro-4,4-dimethyl-2(3H)-furanone|2,2-Dimethylglutaric acid|epsilon-Caprolactone|Ethyl methyl_succinate|2-Ethylglutaric acid|Mono-methyl-adipate|Propyleneglycol diacetate|Methyl 4-pentenoate|Ethyl crotonate|2-O-Methyl-L-fucose|5-Oxohexanal|Prenyl formate|2-Methyl-3-pentenoic acid|4-Methyl-2-pentenoic acid|2-Methyl-2-pentenoic acid|4-Methyl-2,3-pentanedione|3-Hexenoic acid|3,4-Hexanedione|2,3-He…	30.5|34.9|46.1|0.286|34.9|12.9|0.286|30|29.9|26.7|45.2|30|44.7|34.5|34.5|30|34.6|45.2|30|44.7|0|45|34.9|34.5|46.2|34.9|34.9|34.9|46.1	29	M-H | M+FA-H | M-H | M+FA-H | M+FA-H | M+FA-H | M+FA-H | M+FA-H | M+FA-H | M+FA-H | M+FA-H | M-H | M+FA-H | M+FA-H | M-H | M-H | M-H | M+FA-H	C7H12O4 | C6H10O2 | C7H12O4 | C6H10O2 | C6H10O2 | C6H10O2 | C6H10O2 | C6H10O2 | C6H10O2 | C6H10O2 | C6H10O2 | C7H12O4 | C6H10O2 | C6H10O2 | C7H12O4 | C7H12O4 | C7H12O4 | C6H10O2	45.7 | 48 | 45.7 | 47.8 | 47.7 | 45.7 | 45.7 | 45.7 | 47.8 | 47.7 | 47.8 | 45.7 | 45.7 | 48 | 45.7 | 45.7 | 45.7 | 48	-3.44146662050085 | -4.82945405749509 | -3.4414666206784 | -4.82945405749509 | -4.8294540573705 | -4.8294540573705 | -4.8294540573705 | -4.82945405749509 | -4.82945405749509 | -4.82945405749509 | -4.82945405749509 | -3.4414666206784 | -4.8294540573705 | -	97.8265758883137 | 99.3510152963272 | 97.8265758883137 | 99.3510152963272 | 99.3510152963272 | 99.3510152963272 | 99.3510152963272 | 99.3510152963272 | 99.3510152963272 | 99.3510152963272 | 99.3510152963272 | 97.8265758883137 | 99.3510152963272 | 99.3510152963272 | 97.8265758883137 | 97.8265758883137 | 97.8265758883137 | 99.3510152963272		159.066	1	1.717	0.245217	8199.56	8684.47	8668.85	8671.65	8702.13	7387.43	8715.96	8958.04	7467	9358.36	9586.34	7859.64	7736.44	8209.86	7937.15	7379.57	9576.64	11070	10292.6	9764.8	9883.14	8350.29	9556.55	9145.17	9884.63	8641.96		1.14747	0.024942	0.0160661
4.14_339.0493m/z	L3	HMDB0133838 | HMDB0133572 | HMDB0132136 | HMDB0130677 | HMDB0130326 | HMDB0129356 | HMDB0129350 | HMDB0129342 | HMDB0128759 | HMDB0128212 | HMDB0128108 | HMDB0127501 | HMDB0126509 | HMDB0126505 | HMDB0125011 | HMDB0125009 | HMDB0124876 | HMDB0124873 | HMDB0037501 | HMDB0033892 | HMDB0002937	5,6,7-trihydroxy-3-(2-hydroxy-4-methoxyphenyl)-3,4-dihydro-2H-1-benzopyran-4-one | 2,4,6-trihydroxy-2-[(4-hydroxy-3-methoxyphenyl)methyl]-2,3-dihydro-1-benzofuran-3-one | 3,5,7-trihydroxy-2-(4-hydroxyphenyl)-8-methoxy-3,4-dihydro-2H-1-benzopyran-4-one | 5,6,7-trihydroxy-2-(4-hydroxyphenyl)-8-methoxy-3,4-dihydro-2H-1-benzopyran-4-one | 5,6,7-trihydroxy-2-(4-hydroxy-3-methoxyphenyl)-3,4-dihydro-2H-…	21	Endogenous|Food	HMDB0133838|HMDB0133572|HMDB0132136|HMDB0130677|HMDB0130328|HMDB0130326|HMDB0130176|HMDB0130174|HMDB0129356|HMDB0129350|HMDB0129342|HMDB0128864|HMDB0128863|HMDB0128862|HMDB0128760|HMDB0128759|HMDB0128212|HMDB0128199|HMDB0128111|HMDB0128110|HMDB0128109|HMDB0128108|HMDB0127502|HMDB0127501|HMDB0126511|HMDB0126509|HMDB0126506|HMDB0126505|HMDB0125446|HMDB0125011|HMDB0125009|HMDB0124876|HMDB0124873|HMD…	5,6,7-trihydroxy-3-(2-hydroxy-4-methoxyphenyl)-3,4-dihydro-2H-1-benzopyran-4-one|2,4,6-trihydroxy-2-[(4-hydroxy-3-methoxyphenyl)methyl]-2,3-dihydro-1-benzofuran-3-one|3,5,7-trihydroxy-2-(4-hydroxyphenyl)-8-methoxy-3,4-dihydro-2H-1-benzopyran-4-one|5,6,7-trihydroxy-2-(4-hydroxyphenyl)-8-methoxy-3,4-dihydro-2H-1-benzopyran-4-one|3-(4-hydroxy-3-methoxyphenyl)-1-(2,3,4,6-tetrahydroxyphenyl)prop-2-en-…	57.9|57.6|57.9|57.9|5.27|57.7|0|0|52.6|52.6|57.9|0|0|0|5.47|57.9|57.7|0.195|0|0|0|56.2|5.36|52.5|5.22|57.8|5.36|52.5|5.22|52.6|52.6|52.6|52.6|1.51|0|57.8|0|0|52.7|0|0|0|57.8|0	44	M+Na-2H	C16H14O7	49.6 | 49.5 | 49.6 | 49.6 | 49.5 | 48.5 | 48.5 | 49.6 | 49.6 | 49.5 | 49.2 | 48.5 | 49.6 | 48.5 | 48.5 | 48.5 | 48.5 | 48.5 | 49.6 | 48.5 | 49.6	2.26526328732216 | 2.26526328732216 | 2.26526328732216 | 2.26526328750087 | 2.26526328732216 | 2.26526328732216 | 2.26526328732216 | 2.26526328732216 | 2.26526328732216 | 2.26526328732216 | 2.26526328732216 | 2.26526328732216 | 2.26526328732216 | 2.26526328732216 | 2.26526328732216 | 2.26526328732216 | 2.26526328732216 | 2.26526328732216 | 2.26526328732216 | 2.26526328732216 | 2.26526328750087	92.6905		339.049	1	4.13988	0.223767	38066.4	35238.4	34999.6	34305.9	35174.7	40207.3	44752.9	45808.9	47582.1	46018.9	44609.3	34190.8	31234.5	33485.8	34541.8	30362.7	41175.7	45189.3	47718.4	43435.6	45250.2	31685.1	33048.6	27855.6	31323.4	31547.3		-1.02695	0.339967	0.143327
[truncated: 2,438 more rows]

## Sheet: S6 UT raw reads
Locus	WT UT 1 TotalCount	WT UT 1 DvalGenome	WT UT 2 TotalCount	WT UT 2 DvalGenome	WT UT 3 TotalCount	WT UT 3 DvalGenome		aimS UT 1 TotalCount	aimS UT 1 DvalGenome	aimS UT 2 TotalCount	aimS UT 2 DvalGenome	aimS UT 3 TotalCount	aimS UT 3 DvalGenome
ACX60_00005	86	0.0239123	174	0.0823081	1	0.000578008		16	0.00892146	15	0.00845711	71	0.0339794
ACX60_00010	1	0.000338359	90	0.0518072	0	0		40	0.0271413	0	0	0	0
ACX60_00015	3847	1.38107	2557	1.56168	2121	1.58287		1277	0.919339	964	0.701741	1758	1.08629
[truncated: 3,638 more rows]

## Sheet: S7 UT analysis
Locus	WT UT 1 Log2 fitness score	WT UT 2 Log2 fitness score	WT UT 3 Log2 fitness score	Average WT log2 fitness score	aimS UT 1 Log2 fitness score	aimS UT 2 Log2 fitness score	aimS UT 3 Log2 fitness score	Average aimS log2 fitness score	P value
[truncated: 3,400 more rows]

[truncated: 4 more sheets: S8 Dipyridyl raw reads, S9 Dipyridyl analysis, S10 aimS vs WT, S11 aimS06475 vs aimS]
