# Supplementary material for: An Acinetobacter baumannii acyltransferase represses pilin production to maintain energy homeostasis and overcome nutritional immunity
Source: Research Square preprint supplement (doi:10.21203/rs.3.rs-10119738/v1), 2026-06-30
Supplement: Supplementary file 1 [file f5e4afd79c0c307b74643502.docx]

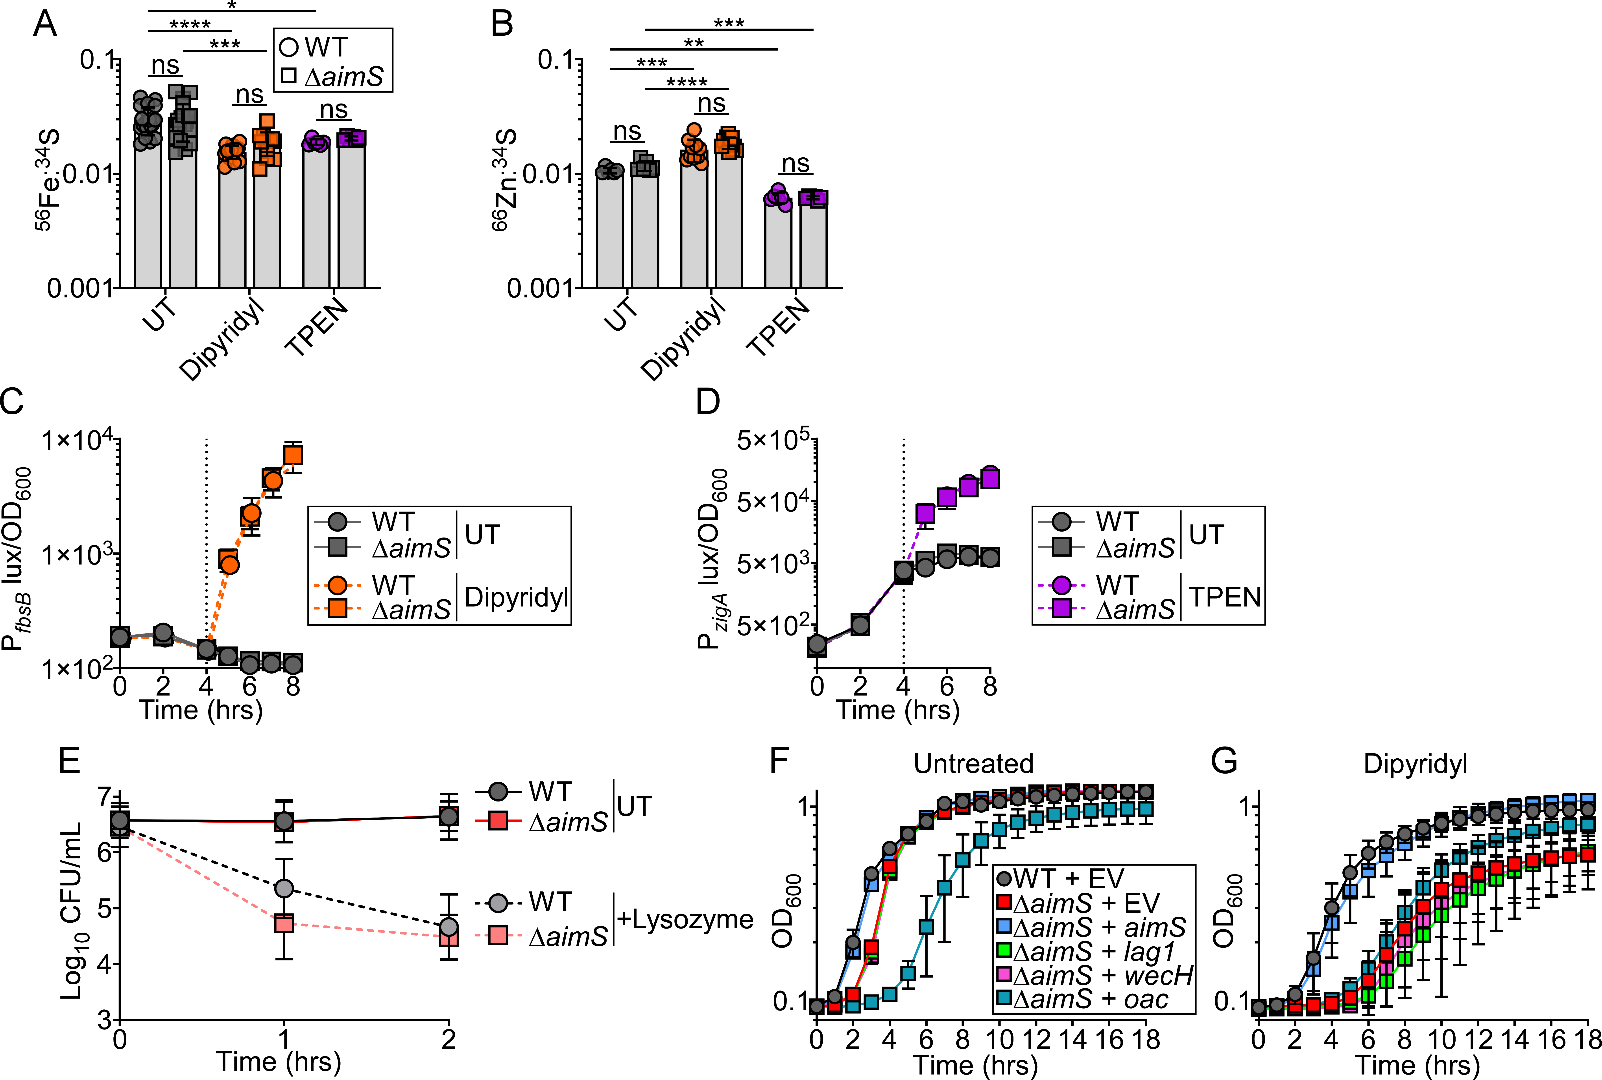


**Figure S1. AimS functions independently of nutrient metal concentrations.**

(**A-B**) Total cellular iron (Fe) (**A**) and zinc (Zn) (**B**) concentrations, normalized to the S concentration, in WT and Δ*aimS* cultured in LB medium for 4 hrs before being left untreated (UT) or treated with either 100 µM of the Fe chelator 2,2’-dipyridyl or 30 µM of the Zn chelator TPEN and cultured for an additional hour. Mean ± SD are shown. Each dot represents an individual biological replicate measured in technical triplicate. * *p* < 0.05, ** *p* < 0.01, ***, *p* < 0.001, **** *p* < 0.0001 determined by Šídák's multiple comparisons test. (**C-D**) WT and ∆*aimS* *A. baumannii* harboring either a Fe-responsive P*fbsB*-lux (**C**) or Zn-responsive P*zigA*-lux (**D**) transcriptional fusion reporter plasmid cultured to mid-log phase before being left untreated or treated with the indicated chelators at 4 hrs (dotted line). Transcriptional activity was monitored overtime by measuring luminescence every hour and dividing by the OD600 value of the culture. Data represent mean ± SD of at least 3 biological replicates performed technical triplicate. (**E**) WT or Δ*aimS* survival in the presence and absence of 1 mg/mL lysozyme in sterile TBS at the indicated time points. Data represent mean ± SD of at least 9 biological replicates. (**F-G**) WT or Δ*aimS* harboring either an empty vector (EV) control plasmid or plasmids encoding the indicated codon optimized AT3 proteins under the control of the *aimS* promoter were cultured in LB medium alone (**F**) or with the addition of 200 µM of the iron chelator 2,2’-dipyridyl (**G**) and bacterial fitness was monitored by recording OD600 of the culture every hour. Data represent mean ± SD of at least 6 biological replicates performed in technical triplicate.


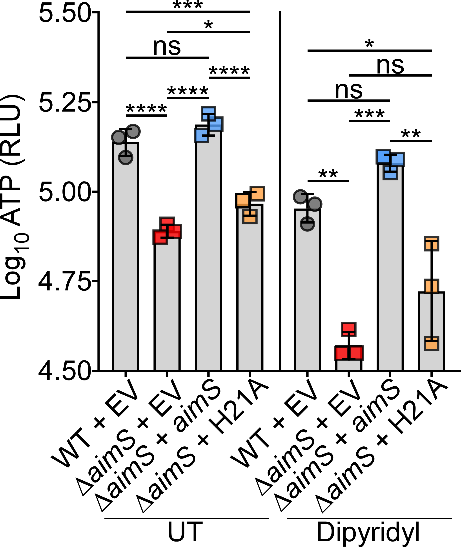


**Figure S2: AimS activity is required to maintain cellular ATP concentrations.**

Total cellular ATP concentration in mid-log phase cultures of WT and Δ*aimS* harboring either an empty vector control plasmid (EV), or a plasmid expressing the indicated *aimS* alleles under the control of the native *aimS* promoter either left untreated (UT) or treated for 1 hr with 100 µM of the iron chelator 2,2’-dipyridyl. Mean ± SD are shown. Each dot represents an individual biological replicate measured in technical triplicate. * *p* < 0.05, ** *p* < 0.01, *** *p* < 0.001, **** *p* < 0.0001 determined by Holm-Šídák's multiple comparisons test.


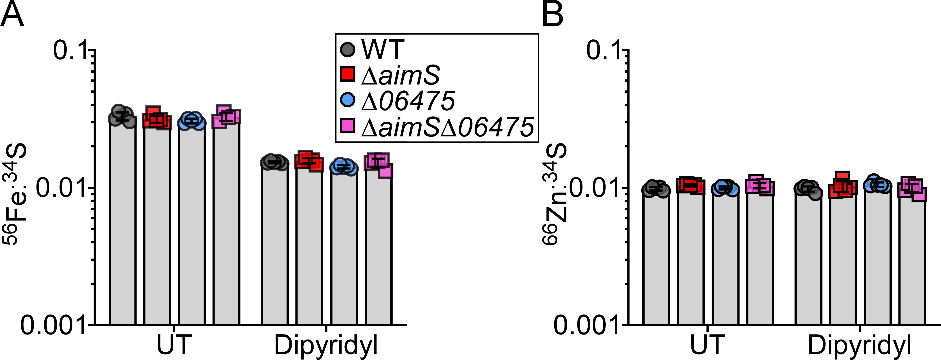


**Figure S3: ACX60_06475 does not impact cellular nutrient metal content.**

(**A-B**) Total cellular iron (Fe) (**A**) and zinc (Zn) (**B**) concentrations, normalized to the S concentration, in indicated *A. baumannii* strains cultured in LB medium for 4 hrs before being left untreated (UT) or treated with either 100 µM of the Fe chelator 2,2’-dipyridyl and cultured for an additional hour. Mean ± SD are shown. Each dot represents an individual biological replicate measured in technical triplicate.


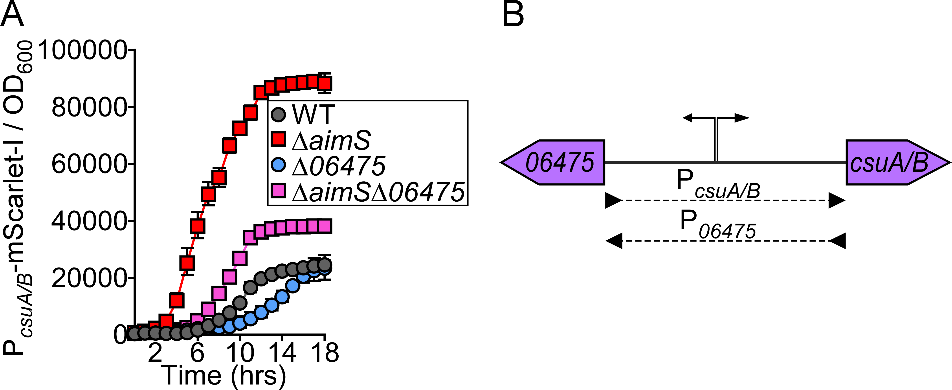


**Figure S4: ACX60_06475 mediates induced *csu* expression in the absence of AimS.**

(**A**) Indicated *A.* *baumannii* strainsharboring a P*csuA/B*-mScarlet-I transcriptional fusion reporter plasmid were cultured in LB medium and transcriptional activity was monitored overtime by measuring mScarlet-I fluorescence every hour and dividing by the OD600 value of the culture. Data represent mean ± SD of 3 biological replicates performed technical. (**B**) Cartoon diagram of the intergenic region between the *06475* and *csuA/B* genes. Predicted promoters (phiSITE) are indicated with arrows. The DNA regions and directionality used for P*csuA/B* and and P*06475* mScarlet-I transcriptional fusion reporters used to generate data in Figures 5 D&E and S4 A are indicated below.


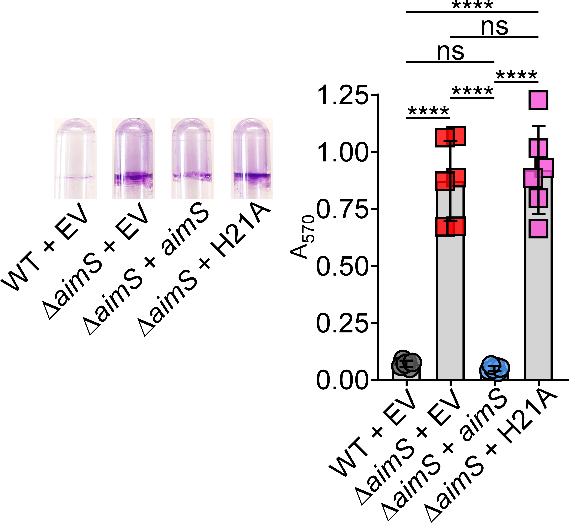


**Figure S5: AimS activity represses biofilm production.**

Static biofilm formation on polystyrene of WT and Δ*aimS* strains harboring either an empty vector control plasmid (EV), or a plasmid expressing the indicated *aimS* alleles under the control of the native *aimS* promoter measured via crystal violet staining at 16 hrs. Mean ± SD are shown. Each dot represents an individual biological replicate measured in technical triplicate. **** *p* < 0.0001 determined by Tukey's multiple comparisons test.

| **Strain** | **Description** | **Reference** |
| --- | --- | --- |
| *E. coli* DH5α | Plasmid maintenance *E. coli* strain used for all cloning in this study | Lab stock |
| *E. coli* HB101 | *E. coli* mating strain | Lab stock |
| *A. baumannii* 17978VU | Used for WT in this study | Lab stock |
| *A. baumannii* 17978VU ∆*aimS* | *A. baumannii* strain with *ACX60_00365* deleted | This study |
| *A. baumannii* 17978VU ∆*06475* | *A. baumannii* strain with the *ACX60_06475* gene replaced with *aph* KanR marker | This study |
| *A. baumannii* 17978VU ∆*aimS*∆*06475* | *A. baumannii* strain with *ACX60_00365* deleted and the *ACX60_06475* gene replaced with *aph* KanR marker | This study |
| *A. baumannii* 17978VU ∆*csu* | *A. baumannii* strain with the whole *csu* operon (*csuA/B, csuA, csuB, csuC. csuD, csuE*) deleted | This study |
| *A. baumannii* 17978VU ∆*aimS*∆*csu* | *A. baumannii* strain with *ACX60_00365* and the whole *csu* operon (*csuA/B, csuA, csuB, csuC. csuD, csuE*) deleted | This study |
|  |  |  |
| **Plasmid** | **Description** | **Reference** |
| pWH1266 | *Acinetobacter* expression plasmid | (1) |
| pFLP2 | *Acinetobacter* allelic exchange vector | (2) |
| pUCK1 | Template of *aph* kanamycin resistance cassette | Lab stock |
| pRK2013 | Bacterial mating helper plasmid | (3) |
| pMU368(tet)-lux | Tetracycline marked vector harboring promoterless lux operon *luxABCDE* | (4) |
| pJNW684 | Himar1 transposon | (5) |
| pBAD33.1 | L-arabinose inducible expression plasmid | Lab stock |
| pWH1266-CG-VmS | mScarlet-I based transcription fusion reporter in pWH1266 background | This study |
| pCG-VmS | *Pseudomonas aeruginosa* transcriptional reporter plasmid used for creation of pWH1266-CG-VmS | (6) |
| pLDP29 | pWH1266 with strong constitutive *rpsA* promoter | (7) |
| pWH1266-*aimS* | AimS native promoter complementation construct | This study |
| pWH1266-*aimSH21A* | AimSH21A variant native promoter complementation construct | This study |
| pWH1266-*aimSR88A* | AimSR88A variant native promoter complementation construct | This study |
| pFLP2-*aimS* | *aimS* markerless allelic exchange construct | This study |
| pFLP2-*06475-Kan* | *06475* KanR allelic exchange construct | This study |
| pFLP2-*csu* | *csuA/B,A,B,C,D,E* markerless allelic exchange construct | This study |
| pMU368(tet)-lux-*aimS* | P*aimS* -lux transcriptional fusion reporter construct | This study |
| pMU368(tet)-lux-*fbsB* | P*fbsB* -lux transcriptional fusion reporter construct | (8) |
| pMU368(tet)-lux-*zigA* | P*zigA* -lux transcriptional fusion reporter construct | This study |
| pWH1266-CG-VmS-P*csuA/B* | P*csuA/B* -mScarlet transcriptional fusion reporter construct | This study |
| pWH1266-CG-VmS-P*06475* | P*ACX60_06475* -mScarlet transcriptional fusion reporter construct | This study |
| pBAD33.1-*06475* | L-arabinose inducible *06475* expression plasmid | This study |
| pLDP29-*csuR* | *csuR* overexpression construct | This study |

**Table S1. Strains and plasmids used in this study**

| **Primer** | **Sequence** | **Description** |
| --- | --- | --- |
| pWH1266_seq_F | TAGGCTTGGTTATGCCGGTACTG | 5’ primer for screening pWH1266 constructs |
| pWH1266_seq_R | GGAAGGAGCTGACTGGGTTGA | 3’ primer for PCR screening pWH1266 constructs |
| pMU368_lux_PaimS_F | ggacggcgcggtaccgagctAAAGTTTTATGTAGAGAAATTCAAATATATAAAG | 5’ primer for amplifying *aimS* promoter |
| pMU368_lux_PaimS_R | tcctcttgcttcatctgcagTCGATGTGCTTCCAGTTTTATTAATATAC | 3’ primer for amplifying *aimS* promoter |
| pWH1266_aimS_F | gcgaccacacccgtcctgtgAAAGTTTTATGTAGAGAAATTCAAATATATAAAG | 5’ primer for amplifying *aimS* promoter and ORF |
| pWH1266_aimS_R | aaggctctcaagggcatcggTTATGATTTATCTTTAATAAAAACCTTTC | 3’ primer for amplifying *aimS* promoter and ORF |
| pFLP2_aimS_up_F | ggttaaaaaggatcgatcctctagACACGGTTCAGCTTTAGTAATC | 5’ primer for amplifying 1000 bp upstream from *aimS* |
| pFLP2_aimS_up_R | ggcttattttTCGATGTGCTTCCAGTTTTATTAATATAC | 3’ primer for amplifying 1000 bp upstream from *aimS* |
| pFLP2_aimS_dwn_F | agcacatcgaAAAATAAGCCCCTTGAAAATAG | 5’ primer for amplifying 1000 bp downstream from *aimS* |
| pFLP2_aimS_dwn_R | aagttcctattctctagggggatccATTGGTTGAAGTGAGACG | 3’ primer for amplifying 1000 bp downstream from *aimS* |
| aimS_KO_ex_F | cgaaagctcagtatgttcttgttttgatgttctgggc | 5’ primer for screening ∆*aimS* clones |
| aimS_KO_ex_R | gaagactggccgagtgacctcgccag | 3’ primer for screening ∆*aimS* clones |
| pFLP2_seq_F | tgaacggcaggtatatgtgatggg | 5’ primer for screening pFLP2 constructs |
| pFLP2_seq_R | aagcgctcgttttcggaaacg | 3’ primer for screening pFLP2 constructs |
| pMU368(tet)lux_seq_F | gccatacccgctcgctacccg | 5’ primer for screening pMU368(tet)-lux constructs |
| pMU368(tet)lux_seq_R | gatgctccagtaaccatacgg | 3’ primer for screening pMU368(tet)-lux constructs |
| pMU368_lux_PzigA_F | ggacggcgcggtaccgagctAAGCAATTTTTTCAAACACTAAG | 5’ primer for amplifying *zigA* promoter |
| pMU368_lux_PzigA_R | tcctcttgcttcatctgcagGGCTGGCCATTTAAATATG | 3’ primer for amplifying *zigA* promoter |
| pWH1266_aimSH21A_F | TCTTTTACATgctTTTAATATTCCCTATAAACTTAAAG | 5’ primer for introducing H21A point mutation |
| pWH1266_aimSH21A_R | ACCAAAAGGATAGAAATTCC | 3’ primer for introducing H21A point mutation |
| pWH1266_aimSR88A_F | TTATATCCGAgctGCAGCGCGTATTTTAC | 5’ primer for introducing R88A point mutation |
| pWH1266_aimSR88A_R | AAATGTTTGAGGTTAATTGC | 3’ primer for introducing R88A point mutation |
| pFLP2_06475_up_F | ggttaaaaaggatcgatcctATATATAAAACAAATTACCTTTTACTATTG | 5’ primer for amplifying 500 pb upstream of *06475* |
| pFLP2_06475_up_R | tagttagtcaTATCCAGCCTGTAAGTAC | 3’ primer for amplifying 500 pb upstream of *06475* |
| pFLP2_06475_kan_F | aggctggataTGACTAACTAGGAGGAATAAATG | 5’ primer for amplifying KanR cassette |
| pFLP2_06475_kan_R | gttttaaaatTCATTATTCCCTCCAGGTAC | 3’ primer for amplifying KanR cassette |
| pFLP2_06475_dwn_F | ggaataatgaATTTTAAAACATAGGAGCCAG | 5’ primer for amplifying 500 pb downstream of *06475* |
| pFLP2_06475_dwn_R | aagttcctattctctaggggTATGAGTATTTCTTAAACTCAAGC | 3’ primer for amplifying 500 pb downstream of *06475* |
| 06475_ex_F | ggtgtacctgtgtttggagcaattgcaccg | 5’ primer for screening ∆*06475* clones |
| 06475_ex_R | ggcgattgcctcatctaagacatctacag | 3’ primer for screening ∆*06475* clones |
| pWH1266_oac_PaimS_R | ttttgtgcattcgatgtgcttccagttttattaatatac | 3’ primer to amplify aimS promoter (pWH1266_aimS_F used as 5’ primer in reaction) |
| pWH1266_oac_F | agcacatcgaatgcacaaaagtaactgtttc | 5’ primer for amplifying codon optimized *oac* |
| pWH1266_oac_R | aaggctctcaagggcatcggttagtccaatgacaactttg | 3’ primer for amplifying codon optimized *oac* |
| pWH1266_wecH_PaimS_R | taggctgcattcgatgtgcttccagttttattaatatac | 3’ primer to amplify aimS promoter (pWH1266_aimS_F used as 5’ primer in reaction) |
| pWH1266_wecH_F | agcacatcgaatgcagcctaaaatttattg | 5’ primer to amplify codon optimized *wecH* |
| pWH1266_wecH_R | aaggctctcaagggcatcggttaagataccaaacgattacg | 3’ primer to amplify codon optimized *wecH* |
| pWH1266_lag1_PaimS_R | tattatacattcgatgtgcttccagttttattaatatac | 3’ primer to amplify aimS promoter (pWH1266_aimS_F used as 5’ primer in reaction) |
| pWH1266_lag1_F | agcacatcgaatgtataataagttaactactagtcaag | 5’ primer to amplify codon optimized *lag1* |
| pWH1266_lag1_R | aaggctctcaagggcatcggttaagtgctgtaagctagtttattac | 3’ primer to amplify codon optimized *lag1* |
| csuAB_qPCR_F | tgctggttatgcggtaaatact | 5’ qPCR primer to quantify *csuAB* transcripts |
| csuAB_qPCR_R | ccttcagtttgactaccacctac | 3’ qPCR primer to quantify *csuAB* transcripts |
| csuA_qPCR_F | gtaaatgcgggtgaaattggag | 5’ qPCR primer to quantify *csuA* transcripts |
| csuA_qPCR_R | aaagctgtggtagcttcacc | 3’ qPCR primer to quantify *csuA* transcripts |
| qPCR_16S_F | ctgtagcgggtctgagaggat | 5’ qPCR primer to quantify housekeeping *16S* transcripts |
| qPCR_16S_R | ccataaggccttcttcacac | 3’ qPCR primer to quantify housekeeping *16S* transcripts |
| pBAD33.1_06475_F | ctttaagaaggagatatacaatgatcaaaattgatacctttg | 5’ primer to amplify *06475* |
| pBAD33.1_06475_R | ctcatccgccaaaacagccattatggttcactgactaatc | 3’ primer to amplify *06475* |
| pBAD33.1_seq_F | atgccatagcatttttatcc | 5’ primer for screening pBAD33.1 constructs |
| pBAD33.1_seq_R | gatttaatctgtatcagg | 3’ primer for PCR screening pBAD33.1 constructs |
| pFLP2_Csu_up_F | ggttaaaaaggatcgatcctcaaagcttcatatacataggg | 5’ primer for amplifying 1000 bp upstream from *csuA/B* |
| pFLP2_Csu_up_R | aaaacagcttattcataacctacatatataatgattag | 3’ primer for amplifying 1000 bp upstream from *csuA/B* |
| pFLP2_Csu_dwn_F | ggttatgaataagctgttttatatagaagataaaagctcag | 5’ primer for amplifying 1000 bp downstream from *csuE* |
| pFLP2_Csu_dwn_R | aagttcctattctctaggggttaccgcaacgctggttg | 3’ primer for amplifying 1000 bp downstream from *csuE* |
| csu_ex_F | gctctatttgactcttacgaattggcttatcgc | 5’ primer for screening ∆*csu* clones |
| csu_ex_R | gtcgaatacgcatcggctatagagcttatgc | 3’ primer for screening ∆*csu* clones |
| P06475_mscarlet_F | cggccgctctagaactagtgattcataacctacatatataatgattag | 5’ primer for amplifying *06475* promoter |
| P06475_mScarletI_R | tggtatatctccttcgctaatatccagcctgtaagtac | 3’ primer for amplifying *06475* promoter |
| PcsuAB_mScarletI_F | cggccgctctagaactagtgtatccagcctgtaagtac | 5’ primer for amplifying *csuA/B* promoter |
| PcsuAB_mScarletI_R | tggtatatctccttcgctaaattcataacctacatatataatgattag | 3’ primer for amplifying *csuA/B* promoter |
| HindIII-SacI-sfGFP-F1 | agctgagctcttacttataaagctcatccatgccgtg | 5’ primer for insertion of pCG-VmS reporter cassette into pWH1266 |
| HindIII-SacI-sfGFP-F2 | gagctcttacttataaagctcatccatgccgtg | 5’ primer for insertion of pCG-VmS reporter cassette into pWH1266 |
| BamHI-KpnI-mScarlet-I-R1 | gatcggtacctcatttataaagctcgtccatgcc | 3’ primer for insertion of pCG-VmS reporter cassette into pWH1266 |
| BamHI-KpnI-mScarlet-I-R2 | ggtacctcatttataaagctcgtccatgcc | 3’ primer for insertion of pCG-VmS reporter cassette into pWH1266 |
| LDP_06475_F | tgactttatcaggtatatccatgatcaaaattgatacctttg | 5’ primer for screening *csuR* overexpression construct |
| LDP_06475_R | agggcatcggtcgacggtacttatggttcactgactaatc | 3’ primer for screening *csuR* overexpression construct |

**Table S2. Primers used in this study**

| *Shigella* o*ac* | atgcacaaaagtaactgtttcgataccgcccgccttgttgctgctatgatggttttggtatcacatcattatgcattatctggacaaccagagccatacctttttggattcgaaagtgctggaggtattgctgttattattttttttagcatttcaggctatttaatttctaaaagtgccatccgttcagactcttttatcgatttcatggctaaacgcgctagacgtatttttccagctttagttccatgttctattttaacatactttcttttcggatggattcttaatgatttcagcgctgaatatttttctcatgatattgtgcgtaagacaatttcatctatctttatgagccaggctcctgatgccgatattaccagtcacctaattcatgccggtataaatggatcattgtggaccttgcctcttgagtttctatgttatatcattactggggtcgcagttgccctattgaaaaatggtaaggccttcatagtcattcttttggtttttgtttcactttcattgattggatctgtctcagaaaatcgcgacgtgatgttttcaatacctttgtggttatatccacttagaggtttggcttttttcttcggtgccacaatggccatgtatgaaaaatcttggaacgttagcaatgtgaagataacagtagtaagtttgttagcaatgtatgcatatgctagttatggaaaggggatagactatacgatgacttgttatattttggttagtttctctaccatagcgatatgtacctctgtaggagatccattagttaaaggtcgttttgattatagctacggagtttatatttatgcttttccagttcaacaggtcgtcataaatacacttcatatgggattttatccatcaatgttattaagcgccgtaactgtcttgttcttgtcacatttgtcttggaaccttgtggaaaagagattcttgacccgaagttctccaaagttgtcattggactaa |
| --- | --- |
| *E. coli* *wecH* | atgcagcctaaaatttattggattgataacttgcgcggtattgcttgtcttatggtcgtcatgattcatacaactacgtggtacgtgaccaatgctcattcagttagcccagtaacttgggatatcgctaacgtgttgaatagtgcatctagagttagcgttcctttgttttttatgattagtggatatttgttttttggagaaagatctgctcaaccacgccatttccttagaattggactttgtcttattttttattcagcgattgcattattgtatatcgcattattcaccagtatcaatatggaattagccctaaagaatttgttacagaagccggtcttttatcacctttggtttttttttgccattgccgtaatatatctagtatcacctttgatccaagttaaaaacgtcggaggcaagatgttgttggtattgatggctgtgatcggtattattgctaacccaaacactgttccgcaaaaaattgacggttttgaatggttgccaattaacttgtatataaatggagatacattttattacatattatatgggatgctagggagagctattgggatgatggatactcagcacaaagctttgtcatgggtttctgctgcattattcgcaaccggagtatttatcatcagtagaggaaccttatatgagctacagtggcgtggtaattttgccgatacatggtatctatattgtggccctatggtatttatctgtgcgattgctttgcttacgcttgtgaagaacactttagatacccgcaccatacgaggattaggtttgatttctcgtcatagtttgggcatatatggttttcacgcgttgattattcatgcacttcgtacaagaggaattgaactaaagaattggcctattttggatattatttggatcttctgcgcaacattagcggccagcctattattatcaatgcttgtccaaagaatcgatcgtaatcgtttggtatcttaa |
| *Legionella lag1* | atgtataataagttaactactagtcaagctacgtatttgaattttttacgtggtttcagtgctatcattgtattagcagggcatactttatcaggaattccaggtgttatctcatttggtaagcaattacctttccaatctttggccgtcaatgcttttttctggttgtctgggtttttaatcacttatcactgtataaccaagaaaccttatactttcgccgagtatatgatagatagattttgccgtatatatgttatctatattcctgtcttgatattgagcgtttttttgttggtcaaagccgatttggctagtatgccagagctaaaggaatgggtagctaatatctttatgatacaacacactcctttcaaccgcatttttgagtttttgccaacaatacctccattggcccaaatcagtccattatggtcaattgctgtcgaatggtggttatacacattatttggtattgcttttttcttccataaatcttcattcgcaaatcgtttgattatgtcaatacttataatcccagcactattagttgccgggtattttactttaaaggagtacgtagctttggtctggttcttaggaagtggttgtgcttatcatttttgcaatattaatagaaagtataataaccacggaatattgatgttaagtttgattacaggagcggccttcttggttcgtttccacgtccttaaacattctttgatgaatatgtatgatcttcagttagttataccaggttgtatatttctatactcattgttacttctattgtctactaataaactttctaagaaaatagagttaattagtgcatttttggcttttatttcatatactttatatctatctcacgagccaatccgacgtgtcgtttctacttttatagaacctactaacttaaagagagggtttcttatatgtggtgtttgtattgcttgtgctacaattattgcttatttactagagaacaaacacttggtcgtccgtgagtggttgaaaagcaaattattgcaaaagaatactagtaataaactagcttacagcacttaa |

**Table S3. Codon optimized sequences of Gram-negative At3 proteins used in Fig S1 F&G.**

| **Sample** | **Index** | **Primer sequence** |
| --- | --- | --- |
| WT UT 1 | cgtcttag | caagcagaagacggcatacgagatctaagacggtgactggagttcagacgtgtgctcttccgatct |
| WT UT 1 | ctgacagt | caagcagaagacggcatacgagatactgtcaggtgactggagttcagacgtgtgctcttccgatct |
| WT UT 3 | aggcagaa | caagcagaagacggcatacgagatttctgcctgtgactggagttcagacgtgtgctcttccgatct |
| *aimS* UT 1 | tatcctct | caagcagaagacggcatacgagatagaggatagtgactggagttcagacgtgtgctcttccgatct |
| *aimS* UT 2 | tcctgagc | caagcagaagacggcatacgagatgctcaggagtgactggagttcagacgtgtgctcttccgatct |
| *aimS* UT 3 | agagtaga | caagcagaagacggcatacgagattctactctgtgactggagttcagacgtgtgctcttccgatct |
| WT dipyridyl 175 1 | ggactcct | caagcagaagacggcatacgagataggagtccgtgactggagttcagacgtgtgctcttccgatct |
| WT dipyridyl 175 2 | gtaaggag | caagcagaagacggcatacgagatctccttacgtgactggagttcagacgtgtgctcttccgatct |
| WT dipyridyl 175 3 | taggcatg | caagcagaagacggcatacgagatcatgcctagtgactggagttcagacgtgtgctcttccgatct |
| *aimS* dipyridyl 175 1 | actgcata | caagcagaagacggcatacgagattatgcagtgtgactggagttcagacgtgtgctcttccgatct |
| *aimS* dipyridyl 175 2 | ctctctac | caagcagaagacggcatacgagatgtagagaggtgactggagttcagacgtgtgctcttccgatct |
| *aimS* dipyridyl 175 3 | aaggagta | caagcagaagacggcatacgagattactccttgtgactggagttcagacgtgtgctcttccgatct |

**Table S4. Indexing primers for Tn-seq**

1. Hunger, M., Schmucker, R., Kishan, V., and Hillen, W., Analysis and nucleotide sequence of an origin of DNA replication in *Acinetobacter calcoaceticus* and its use for *Escherichia coli* shuttle plasmids. Gene, 1990. *87*, 1. <https://doi.org/10.1016/0378-1119(90)90494-c>.

2. Hoang, T.T., Karkhoff-Schweizer, R.R., Kutchma, A.J., and Schweizer, H.P., A broad-host-range Flp-FRT recombination system for site-specific excision of chromosomally-located DNA sequences: application for isolation of unmarked *Pseudomonas aeruginosa* mutants. Gene, 1998. *212*, 1. <https://doi.org/10.1016/s0378-1119(98)00130-9>.

3. Figurski, D.H. and Helinski, D.R., Replication of an origin-containing derivative of plasmid RK2 dependent on a plasmid function provided in trans. Proc Natl Acad Sci U S A, 1979. *76*, 4. <https://doi.org/10.1073/pnas.76.4.1648>.

4. Juttukonda, L.J., Chazin, W.J., and Skaar, E.P., *Acinetobacter baumannii* Coordinates Urea Metabolism with Metal Import To Resist Host-Mediated Metal Limitation. mBio, 2016. *7*, 5. <https://doi.org/10.1128/mBio.01475-16>.

5. Wang, N., Ozer, E.A., Mandel, M.J., and Hauser, A.R., Genome-wide identification of *Acinetobacter baumannii* genes necessary for persistence in the lung. MBio, 2014. *5*, 3. <https://doi.org/10.1128/mBio.01163-14>.

6. Corcoran, C.J., Glanville, D.G., Resko, Z.J., Cassin, E.K., Marten, A.D., Kamp, D.L., Visick, K.L., Nyholm, S.V., Tseng, B.S., Kroken, A.R.*, et al.*, A versatile dual-color bacterial reporter system highlights two distinct *Pseudomonas aeruginosa* type 3 secretion system intracellular populations. Appl Environ Microbiol, 2026, <https://doi.org/10.1128/aem.00490-26>.

7. Palmer, L.D., Minor, K.E., Mettlach, J.A., Rivera, E.S., Boyd, K.L., Caprioli, R.M., Spraggins, J.M., Dalebroux, Z.D., and Skaar, E.P., Modulating Isoprenoid Biosynthesis Increases Lipooligosaccharides and Restores *Acinetobacter baumannii* Resistance to Host and Antibiotic Stress. Cell Rep, 2020. *32*, 10. <https://doi.org/10.1016/j.celrep.2020.108129>.

8. Sheldon, J.R., Himmel, L.E., Kunkle, D.E., Monteith, A.J., Maloney, K.N., and Skaar, E.P., Lipocalin-2 is an essential component of the innate immune response to *Acinetobacter baumannii* infection. PLoS Pathog, 2022. *18*, 9. <https://doi.org/10.1371/journal.ppat.1010809>.
